# Supplementary material for: Comparative transcriptome analysis revealed genes involved in the fruiting body development of Ophiocordyceps sinensis
Source: PeerJ. 2020 Jan 16;8:e8379. doi: 10.7717/peerj.8379 (PMC6970007; doi:10.7717/peerj.8379)
Supplement: Supplemental Information 3 — The enriched GO functional classification of DEGs with a threshold value of p ≤ 0.01 in FB vs. DF, DF vs. CM, and FB vs. CM, respectively. [file peerj-08-8379-s003.xls]

## Sheet: FB_vs_CM.DEGs.significant
Supplemental information 3. GO enrichment of DEGs in FB vs.CM with log2FC ≥ 2, p ≤ 0.01
Class	GO	Description	Annotated	Significant	Pvalue	AdjustedP(fdr)	Gene ID
Molecular Function	GO:0003735	structural constituent of ribosome	58	21	1.1e-08	3.861e-06	MSTRG.10395,MSTRG.10551,MSTRG.1119,MSTRG.1266,MSTRG.16,MSTRG.1771,MSTRG.1924,MSTRG.2068,MSTRG.2397,MSTRG.245,MSTRG.2518,MSTRG.2526,MSTRG.2878,MSTRG.2906,MSTRG.2926,MSTRG.2990,MSTRG.3485,MSTRG.3513,MSTRG.3515,MSTRG.3745,MSTRG.3932,MSTRG.3941,MSTRG.4280,MSTRG.4331,MSTRG.448,MSTRG.450,MSTRG.4528,MSTRG.4768,MSTRG.4788,MSTRG.4917,MSTRG.4961,MSTRG.5003,MSTRG.5013,MSTRG.5041,MSTRG.5110,MSTRG.5469,MSTRG.…
	GO:0005506	iron ion binding	63	18	7e-06	0.0012285	gene1321,gene5078,MSTRG.10357,MSTRG.10382,MSTRG.10421,MSTRG.10437,MSTRG.10613,MSTRG.11160,MSTRG.11259,MSTRG.1478,MSTRG.1595,MSTRG.1669,MSTRG.1686,MSTRG.2228,MSTRG.2308,MSTRG.2513,MSTRG.2669,MSTRG.2786,MSTRG.2794,MSTRG.2817,MSTRG.3006,MSTRG.3097,MSTRG.3133,MSTRG.3201,MSTRG.3434,MSTRG.3489,MSTRG.3496,MSTRG.3691,MSTRG.3707,MSTRG.3757,MSTRG.3808,MSTRG.3912,MSTRG.4512,MSTRG.4629,MSTRG.4681,MSTRG.4837,…
	GO:0020037	heme binding	66	17	5.6e-05	0.006552	gene1321,gene5078,MSTRG.10008,MSTRG.10245,MSTRG.10357,MSTRG.10421,MSTRG.10437,MSTRG.10458,MSTRG.10613,MSTRG.10887,MSTRG.11160,MSTRG.130,MSTRG.1478,MSTRG.1595,MSTRG.1669,MSTRG.2071,MSTRG.2228,MSTRG.2513,MSTRG.2669,MSTRG.2794,MSTRG.2817,MSTRG.3006,MSTRG.3097,MSTRG.3201,MSTRG.3434,MSTRG.3489,MSTRG.3496,MSTRG.365,MSTRG.3707,MSTRG.3708,MSTRG.3757,MSTRG.3808,MSTRG.3912,MSTRG.4397,MSTRG.4512,MSTRG.4629,…
	GO:0016491	oxidoreductase activity	385	71	0.00056	0.04914	gene1030,gene1321,gene1323,gene1611,gene2681,gene2682,gene288,gene3739,gene4033,gene5078,gene5712,gene6241,gene704,gene927,MSTRG.10008,MSTRG.10028,MSTRG.10064,MSTRG.10068,MSTRG.10096,MSTRG.10118,MSTRG.10205,MSTRG.10221,MSTRG.10245,MSTRG.10253,MSTRG.10314,MSTRG.10357,MSTRG.10382,MSTRG.10412,MSTRG.10413,MSTRG.10421,MSTRG.10437,MSTRG.1050,MSTRG.1051,MSTRG.10603,MSTRG.10613,MSTRG.10633,MSTRG.10678,MS…
	GO:0004497	monooxygenase activity	60	13	0.00243	0.170586	gene1321,gene1611,gene5078,MSTRG.10357,MSTRG.10421,MSTRG.10437,MSTRG.10613,MSTRG.1224,MSTRG.1225,MSTRG.1238,MSTRG.1478,MSTRG.1595,MSTRG.1648,MSTRG.1667,MSTRG.1668,MSTRG.1669,MSTRG.2457,MSTRG.2513,MSTRG.2669,MSTRG.2786,MSTRG.2794,MSTRG.2817,MSTRG.2923,MSTRG.3006,MSTRG.3037,MSTRG.3097,MSTRG.3496,MSTRG.356,MSTRG.3682,MSTRG.3707,MSTRG.3757,MSTRG.3808,MSTRG.3847,MSTRG.3852,MSTRG.3912,MSTRG.3982,MSTRG.…
	GO:0030246	carbohydrate binding	18	6	0.00431	0.252135	gene3927,MSTRG.2084,MSTRG.2108,MSTRG.2308,MSTRG.2405,MSTRG.2919,MSTRG.2972,MSTRG.2973,MSTRG.3492,MSTRG.5107,MSTRG.5232,MSTRG.6732,MSTRG.7559,MSTRG.8275,MSTRG.837,MSTRG.8579,MSTRG.9077,MSTRG.950
	GO:0008080	N-acetyltransferase activity	14	5	0.00627	0.314396	MSTRG.111,MSTRG.11142,MSTRG.2337,MSTRG.2367,MSTRG.3017,MSTRG.4423,MSTRG.4991,MSTRG.508,MSTRG.5493,MSTRG.6290,MSTRG.6778,MSTRG.7186,MSTRG.8101,MSTRG.955
	GO:0016705	oxidoreductase activity, acting on paired donors, with incorporation or reduction of molecular oxygen	61	14	0.00806	0.33969	gene1321,gene5078,MSTRG.10357,MSTRG.10421,MSTRG.10437,MSTRG.1050,MSTRG.10613,MSTRG.1224,MSTRG.1238,MSTRG.1478,MSTRG.1595,MSTRG.1667,MSTRG.1668,MSTRG.1669,MSTRG.2228,MSTRG.2308,MSTRG.2457,MSTRG.2513,MSTRG.2669,MSTRG.2794,MSTRG.2817,MSTRG.3006,MSTRG.3037,MSTRG.3097,MSTRG.3201,MSTRG.3496,MSTRG.3707,MSTRG.3757,MSTRG.3808,MSTRG.3912,MSTRG.4512,MSTRG.4629,MSTRG.4681,MSTRG.4752,MSTRG.4769,MSTRG.4916,MST…
	GO:0016620	oxidoreductase activity, acting on the aldehyde or oxo group of donors, NAD or NADP as acceptor	15	5	0.00871	0.33969	MSTRG.10253,MSTRG.1343,MSTRG.136,MSTRG.287,MSTRG.2912,MSTRG.2913,MSTRG.3749,MSTRG.4245,MSTRG.6647,MSTRG.6654,MSTRG.7331,MSTRG.7627,MSTRG.9730,MSTRG.9913,MSTRG.9965
Biological Process	GO:0055114	oxidation-reduction process	390	74	1.1e-11	1.0758e-08	gene1030,gene1321,gene1323,gene1611,gene2681,gene2682,gene2840,gene288,gene3739,gene4033,gene5078,gene5712,gene704,gene927,MSTRG.10008,MSTRG.10028,MSTRG.10038,MSTRG.10064,MSTRG.10068,MSTRG.10096,MSTRG.10118,MSTRG.10205,MSTRG.10221,MSTRG.10245,MSTRG.10253,MSTRG.10339,MSTRG.10357,MSTRG.104,MSTRG.10412,MSTRG.10413,MSTRG.10421,MSTRG.10437,MSTRG.1050,MSTRG.1051,MSTRG.10603,MSTRG.10613,MSTRG.10633,MSTR…
	GO:0006412	translation	166	29	1.1e-08	5.379e-06	gene1772,MSTRG.100,MSTRG.10294,MSTRG.10395,MSTRG.10470,MSTRG.10551,MSTRG.10962,MSTRG.11000,MSTRG.1119,MSTRG.11248,MSTRG.1525,MSTRG.16,MSTRG.1771,MSTRG.1924,MSTRG.2068,MSTRG.2106,MSTRG.2131,MSTRG.22,MSTRG.2397,MSTRG.2433,MSTRG.245,MSTRG.2518,MSTRG.2524,MSTRG.2526,MSTRG.2574,MSTRG.26,MSTRG.2709,MSTRG.2711,MSTRG.2832,MSTRG.2878,MSTRG.2906,MSTRG.2926,MSTRG.2981,MSTRG.2990,MSTRG.3029,MSTRG.3310,MSTRG.…
	GO:0008152	metabolic process	2491	248	1.7e-06	0.0005542	gene1030,gene1071,gene1172,gene1187,gene1321,gene1322,gene1323,gene1532,gene1611,gene1612,gene1725,gene1772,gene1773,gene1774,gene1876,gene1882,gene1929,gene2071,gene217,gene2372,gene2404,gene2484,gene2679,gene2681,gene2682,gene2772,gene2839,gene2840,gene288,gene3230,gene3252,gene3301,gene3630,gene3739,gene40,gene4033,gene4157,gene4261,gene4267,gene4390,gene4429,gene4728,gene5063,gene5074,gene507…
	GO:0042254	ribosome biogenesis	117	24	4.5e-06	0.00110025	MSTRG.10056,MSTRG.10238,MSTRG.10272,MSTRG.10395,MSTRG.10551,MSTRG.10703,MSTRG.1119,MSTRG.1168,MSTRG.1250,MSTRG.1266,MSTRG.1275,MSTRG.1315,MSTRG.1432,MSTRG.1516,MSTRG.16,MSTRG.1771,MSTRG.1924,MSTRG.2015,MSTRG.2068,MSTRG.2397,MSTRG.2429,MSTRG.245,MSTRG.25,MSTRG.2518,MSTRG.2526,MSTRG.2528,MSTRG.2533,MSTRG.2587,MSTRG.2768,MSTRG.2831,MSTRG.2833,MSTRG.2878,MSTRG.2906,MSTRG.2926,MSTRG.2945,MSTRG.2990,MS…
	GO:0005975	carbohydrate metabolic process	166	32	0.00024	0.046944	gene2484,gene2840,gene677,gene939,MSTRG.10038,MSTRG.10060,MSTRG.10061,MSTRG.10064,MSTRG.10138,MSTRG.10339,MSTRG.104,MSTRG.10557,MSTRG.10558,MSTRG.10602,MSTRG.1062,MSTRG.10640,MSTRG.1069,MSTRG.10714,MSTRG.10743,MSTRG.10830,MSTRG.11135,MSTRG.11259,MSTRG.1218,MSTRG.1323,MSTRG.133,MSTRG.1544,MSTRG.1572,MSTRG.1598,MSTRG.164,MSTRG.1658,MSTRG.1659,MSTRG.1727,MSTRG.1759,MSTRG.1788,MSTRG.2086,MSTRG.2096,M…
	GO:0072525	pyridine-containing compound biosynthetic process	12	5	0.00066	0.0936086	MSTRG.10382,MSTRG.2535,MSTRG.2668,MSTRG.2849,MSTRG.2850,MSTRG.3175,MSTRG.6601,MSTRG.7714,MSTRG.7774,MSTRG.8436,MSTRG.9,MSTRG.959
	GO:0044106	cellular amine metabolic process	35	6	0.00067	0.0936086	MSTRG.10008,MSTRG.10043,MSTRG.10489,MSTRG.10566,MSTRG.1520,MSTRG.1556,MSTRG.26,MSTRG.2832,MSTRG.2913,MSTRG.3862,MSTRG.4177,MSTRG.4374,MSTRG.4753,MSTRG.5005,MSTRG.5988,MSTRG.5989,MSTRG.6100,MSTRG.6205,MSTRG.6370,MSTRG.6393,MSTRG.6601,MSTRG.6649,MSTRG.6817,MSTRG.6889,MSTRG.7302,MSTRG.7409,MSTRG.7650,MSTRG.8003,MSTRG.8620,MSTRG.865,MSTRG.8654,MSTRG.8720,MSTRG.959,MSTRG.9657,MSTRG.9658
	GO:0044262	cellular carbohydrate metabolic process	38	11	0.001	0.12225	gene2840,MSTRG.10743,MSTRG.11135,MSTRG.11259,MSTRG.1323,MSTRG.133,MSTRG.2086,MSTRG.2205,MSTRG.2277,MSTRG.2296,MSTRG.2946,MSTRG.3155,MSTRG.32,MSTRG.3495,MSTRG.4540,MSTRG.4891,MSTRG.499,MSTRG.4992,MSTRG.5107,MSTRG.5548,MSTRG.5575,MSTRG.5942,MSTRG.6214,MSTRG.707,MSTRG.7386,MSTRG.7601,MSTRG.774,MSTRG.775,MSTRG.777,MSTRG.8101,MSTRG.8221,MSTRG.8412,MSTRG.8518,MSTRG.8626,MSTRG.9077,MSTRG.9495,MSTRG.9556…
	GO:1901617	organic hydroxy compound biosynthetic process	16	5	0.00248	0.269493	gene1725,MSTRG.10566,MSTRG.1556,MSTRG.2205,MSTRG.2849,MSTRG.2850,MSTRG.4750,MSTRG.4992,MSTRG.5575,MSTRG.5781,MSTRG.5942,MSTRG.5943,MSTRG.7031,MSTRG.7714,MSTRG.9556,MSTRG.968
	GO:0072593	reactive oxygen species metabolic process	9	4	0.00513	0.501714	MSTRG.11169,MSTRG.1544,MSTRG.5954,MSTRG.5955,MSTRG.6370,MSTRG.6889,MSTRG.6951,MSTRG.865,MSTRG.9418
	GO:0006414	translational elongation	25	4	0.00768	0.657705	gene1772,MSTRG.100,MSTRG.10470,MSTRG.1525,MSTRG.2397,MSTRG.2574,MSTRG.2711,MSTRG.3479,MSTRG.3531,MSTRG.3564,MSTRG.3833,MSTRG.438,MSTRG.4414,MSTRG.6527,MSTRG.6720,MSTRG.6814,MSTRG.6925,MSTRG.6998,MSTRG.7430,MSTRG.7578,MSTRG.767,MSTRG.9308,MSTRG.9383,MSTRG.9967,MSTRG.9968
	GO:0051171	regulation of nitrogen compound metabolic process	229	16	0.00807	0.657705	gene2682,MSTRG.10036,MSTRG.10037,MSTRG.10058,MSTRG.10136,MSTRG.10152,MSTRG.10190,MSTRG.10259,MSTRG.10385,MSTRG.10480,MSTRG.10495,MSTRG.10566,MSTRG.10573,MSTRG.1063,MSTRG.10647,MSTRG.10683,MSTRG.10684,MSTRG.10721,MSTRG.10769,MSTRG.10777,MSTRG.10813,MSTRG.10814,MSTRG.10859,MSTRG.10882,MSTRG.10883,MSTRG.10884,MSTRG.10892,MSTRG.10893,MSTRG.10961,MSTRG.10993,MSTRG.1104,MSTRG.11043,MSTRG.11082,MSTRG.11…
Cellular Component	GO:0015935	small ribosomal subunit	11	7	2.4e-06	0.0005448	MSTRG.1266,MSTRG.245,MSTRG.2926,MSTRG.448,MSTRG.5003,MSTRG.5601,MSTRG.5846,MSTRG.6998,MSTRG.7189,MSTRG.8419,MSTRG.9634
	GO:0005840	ribosome	162	31	5.4e-05	0.006129	gene1772,gene2068,gene940,MSTRG.100,MSTRG.10179,MSTRG.10219,MSTRG.10272,MSTRG.10395,MSTRG.10470,MSTRG.10533,MSTRG.10551,MSTRG.10962,MSTRG.1119,MSTRG.11248,MSTRG.1165,MSTRG.1266,MSTRG.1514,MSTRG.1516,MSTRG.1525,MSTRG.16,MSTRG.1771,MSTRG.1912,MSTRG.1924,MSTRG.2068,MSTRG.22,MSTRG.2326,MSTRG.2397,MSTRG.245,MSTRG.2518,MSTRG.2526,MSTRG.2574,MSTRG.2598,MSTRG.2709,MSTRG.2711,MSTRG.2878,MSTRG.2904,MSTRG.2…

## Sheet: FB vs DF
Supplemental information 3. GO enrichment of DEGs in FB vs.DF with log2FC ≥ 2, p ≤ 0.01
Class	GO	Gene Description	Annotated	Significant	Pvalue	adjusted p（FDR）	GeneID
Molecualr Fucntion	GO:0003735	structural constituent of ribosome	58	20	1.5e-11	5.265e-09	MSTRG.10395,MSTRG.10551,MSTRG.1119,MSTRG.1266,MSTRG.16,MSTRG.1771,MSTRG.1924,MSTRG.2068,MSTRG.2397,MSTRG.245,MSTRG.2518,MSTRG.2526,MSTRG.2878,MSTRG.2906,MSTRG.2926,MSTRG.2990,MSTRG.3485,MSTRG.3513,MSTRG.3515,MSTRG.3745,MSTRG.3932,MSTRG.3941,MSTRG.4280,MSTRG.4331,MSTRG.448,MSTRG.450,MSTRG.4528,MSTRG.4768,MSTRG.4788,MSTRG.4917,MSTRG.4961,MSTRG.5003,MSTRG.5013,MSTRG.5041,MSTRG.5110,MSTRG.5469,MSTRG.…
	GO:0004298	threonine-type endopeptidase activity	13	4	0.0051	0.6435	MSTRG.10070,MSTRG.2028,MSTRG.2548,MSTRG.2958,MSTRG.3594,MSTRG.4139,MSTRG.4521,MSTRG.4522,MSTRG.5414,MSTRG.7028,MSTRG.7098,MSTRG.9078,MSTRG.9239
	GO:0003688	DNA replication origin binding	7	3	0.0055	0.6435	MSTRG.10127,MSTRG.10423,MSTRG.1434,MSTRG.3972,MSTRG.507,MSTRG.5848,MSTRG.9495
Biological Process	GO:0006412	translation	166	27	3.8e-11	3.7164e-08	gene1772,MSTRG.100,MSTRG.10294,MSTRG.10395,MSTRG.10470,MSTRG.10551,MSTRG.10962,MSTRG.11000,MSTRG.1119,MSTRG.11248,MSTRG.1525,MSTRG.16,MSTRG.1771,MSTRG.1924,MSTRG.2068,MSTRG.2106,MSTRG.2131,MSTRG.22,MSTRG.2397,MSTRG.2433,MSTRG.245,MSTRG.2518,MSTRG.2524,MSTRG.2526,MSTRG.2574,MSTRG.26,MSTRG.2709,MSTRG.2711,MSTRG.2832,MSTRG.2878,MSTRG.2906,MSTRG.2926,MSTRG.2981,MSTRG.2990,MSTRG.3029,MSTRG.3310,MSTRG.…
	GO:0042254	ribosome biogenesis	117	23	7.8e-08	3.8142e-05	MSTRG.10056,MSTRG.10238,MSTRG.10272,MSTRG.10395,MSTRG.10551,MSTRG.10703,MSTRG.1119,MSTRG.1168,MSTRG.1250,MSTRG.1266,MSTRG.1275,MSTRG.1315,MSTRG.1432,MSTRG.1516,MSTRG.16,MSTRG.1771,MSTRG.1924,MSTRG.2015,MSTRG.2068,MSTRG.2397,MSTRG.2429,MSTRG.245,MSTRG.25,MSTRG.2518,MSTRG.2526,MSTRG.2528,MSTRG.2533,MSTRG.2587,MSTRG.2768,MSTRG.2831,MSTRG.2833,MSTRG.2878,MSTRG.2906,MSTRG.2926,MSTRG.2945,MSTRG.2990,MS…
	GO:0000070	mitotic sister chromatid segregation	7	4	0.00035	0.1141	MSTRG.1046,MSTRG.1272,MSTRG.1871,MSTRG.1872,MSTRG.4986,MSTRG.7792,MSTRG.8367
	GO:1901617	organic hydroxy compound biosynthetic process	16	4	0.00076	0.18582	gene1725,MSTRG.10566,MSTRG.1556,MSTRG.2205,MSTRG.2849,MSTRG.2850,MSTRG.4750,MSTRG.4992,MSTRG.5575,MSTRG.5781,MSTRG.5942,MSTRG.5943,MSTRG.7031,MSTRG.7714,MSTRG.9556,MSTRG.968
	GO:0008152	metabolic process	2491	160	0.00181	0.354036	gene1030,gene1071,gene1172,gene1187,gene1321,gene1322,gene1323,gene1532,gene1611,gene1612,gene1725,gene1772,gene1773,gene1774,gene1876,gene1882,gene1929,gene2071,gene217,gene2372,gene2404,gene2484,gene2679,gene2681,gene2682,gene2772,gene2839,gene2840,gene288,gene3230,gene3252,gene3301,gene3630,gene3739,gene40,gene4033,gene4157,gene4261,gene4267,gene4390,gene4429,gene4728,gene5063,gene5074,gene507…
	GO:0032508	DNA duplex unwinding	18	5	0.003	0.37816	MSTRG.10127,MSTRG.1023,MSTRG.1024,MSTRG.10423,MSTRG.1434,MSTRG.1999,MSTRG.2488,MSTRG.2605,MSTRG.3592,MSTRG.3972,MSTRG.502,MSTRG.507,MSTRG.5848,MSTRG.6167,MSTRG.6199,MSTRG.6298,MSTRG.7322,MSTRG.7641
	GO:0006414	translational elongation	25	5	0.00335	0.37816	gene1772,MSTRG.100,MSTRG.10470,MSTRG.1525,MSTRG.2397,MSTRG.2574,MSTRG.2711,MSTRG.3479,MSTRG.3531,MSTRG.3564,MSTRG.3833,MSTRG.438,MSTRG.4414,MSTRG.6527,MSTRG.6720,MSTRG.6814,MSTRG.6925,MSTRG.6998,MSTRG.7430,MSTRG.7578,MSTRG.767,MSTRG.9308,MSTRG.9383,MSTRG.9967,MSTRG.9968
	GO:0006081	cellular aldehyde metabolic process	19	5	0.0034	0.37816	MSTRG.10489,MSTRG.1343,MSTRG.2507,MSTRG.2849,MSTRG.2850,MSTRG.2912,MSTRG.2913,MSTRG.3528,MSTRG.499,MSTRG.5088,MSTRG.5548,MSTRG.6107,MSTRG.6649,MSTRG.7195,MSTRG.7386,MSTRG.7714,MSTRG.775,MSTRG.8221,MSTRG.8828
	GO:0000727	double-strand break repair via break-induced replication	6	3	0.00348	0.37816	MSTRG.10127,MSTRG.10423,MSTRG.1434,MSTRG.3972,MSTRG.507,MSTRG.5848
	GO:0006270	DNA replication initiation	13	4	0.00538	0.47433	gene217,MSTRG.10127,MSTRG.10423,MSTRG.1434,MSTRG.3972,MSTRG.502,MSTRG.507,MSTRG.5848,MSTRG.7467,MSTRG.8910,MSTRG.9104,MSTRG.9308,MSTRG.9495
	GO:0006267	pre-replicative complex assembly involved in nuclear cell cycle DNA replication	7	3	0.00582	0.47433	MSTRG.10127,MSTRG.10423,MSTRG.1434,MSTRG.3972,MSTRG.507,MSTRG.5848,MSTRG.9495
	GO:0006271	DNA strand elongation involved in DNA replication	7	3	0.00582	0.47433	MSTRG.10127,MSTRG.10423,MSTRG.3972,MSTRG.4230,MSTRG.507,MSTRG.5848,MSTRG.610
Cellular Component	GO:0015935	small ribosomal subunit	11	7	1.4e-06	0.0003178	MSTRG.1266,MSTRG.245,MSTRG.2926,MSTRG.448,MSTRG.5003,MSTRG.5601,MSTRG.5846,MSTRG.6998,MSTRG.7189,MSTRG.8419,MSTRG.9634
	GO:0005840	ribosome	162	29	0.00013	0.014755	gene1772,gene2068,gene940,MSTRG.100,MSTRG.10179,MSTRG.10219,MSTRG.10272,MSTRG.10395,MSTRG.10470,MSTRG.10533,MSTRG.10551,MSTRG.10962,MSTRG.1119,MSTRG.11248,MSTRG.1165,MSTRG.1266,MSTRG.1514,MSTRG.1516,MSTRG.1525,MSTRG.16,MSTRG.1771,MSTRG.1912,MSTRG.1924,MSTRG.2068,MSTRG.22,MSTRG.2326,MSTRG.2397,MSTRG.245,MSTRG.2518,MSTRG.2526,MSTRG.2574,MSTRG.2598,MSTRG.2709,MSTRG.2711,MSTRG.2878,MSTRG.2904,MSTRG.2…
	GO:0042555	MCM complex	7	4	0.00058	0.032915	MSTRG.10127,MSTRG.10423,MSTRG.1434,MSTRG.3972,MSTRG.502,MSTRG.507,MSTRG.5848
	GO:0044815	DNA packaging complex	7	4	0.00058	0.032915	MSTRG.1046,MSTRG.1871,MSTRG.1872,MSTRG.6681,MSTRG.7792,MSTRG.9132,MSTRG.9345
	GO:0000793	condensed chromosome	21	5	0.00441	0.145564	MSTRG.1046,MSTRG.1272,MSTRG.1871,MSTRG.1872,MSTRG.2330,MSTRG.2856,MSTRG.287,MSTRG.3406,MSTRG.3444,MSTRG.4986,MSTRG.5290,MSTRG.6176,MSTRG.6829,MSTRG.7043,MSTRG.7414,MSTRG.7792,MSTRG.7869,MSTRG.8266,MSTRG.8337,MSTRG.9559,MSTRG.9689
	GO:0031261	DNA replication preinitiation complex	6	3	0.00513	0.145564	MSTRG.10127,MSTRG.10423,MSTRG.1434,MSTRG.3972,MSTRG.507,MSTRG.5848
	GO:0005656	nuclear pre-replicative complex	6	3	0.00513	0.145564	MSTRG.10127,MSTRG.10423,MSTRG.1434,MSTRG.3972,MSTRG.507,MSTRG.5848
	GO:0031298	replication fork protection complex	6	3	0.00513	0.145564	MSTRG.10127,MSTRG.10423,MSTRG.1434,MSTRG.3972,MSTRG.507,MSTRG.5848
	GO:0046809	replication compartment	7	3	0.00855	0.21565	MSTRG.10127,MSTRG.10423,MSTRG.1434,MSTRG.3972,MSTRG.507,MSTRG.5848,MSTRG.9495

## Sheet: DF vs CM
Supplemental information 3. GO enrichment of DEGs in DF vs.CM with log2FC ≥ 2, p ≤ 0.01
Class	GO	Description	Annotated	Significant	Pvalue	AdjustedP(fdr)	Gene ID
Molecular Function	GO:0005524	ATP binding	454	79	7.1e-05	0.024921	gene1071,gene1187,gene1772,gene2839,gene4157,MSTRG.10024,MSTRG.10036,MSTRG.10037,MSTRG.10094,MSTRG.10127,MSTRG.10129,MSTRG.1023,MSTRG.1024,MSTRG.10272,MSTRG.10274,MSTRG.10294,MSTRG.10306,MSTRG.10317,MSTRG.10330,MSTRG.104,MSTRG.10423,MSTRG.10458,MSTRG.1046,MSTRG.1047,MSTRG.105,MSTRG.10652,MSTRG.1072,MSTRG.10758,MSTRG.10766,MSTRG.10777,MSTRG.10779,MSTRG.10780,MSTRG.1084,MSTRG.10887,MSTRG.10894,MSTR…
	GO:0003688	DNA replication origin binding	7	5	0.00038	0.06669	MSTRG.10127,MSTRG.10423,MSTRG.1434,MSTRG.3972,MSTRG.507,MSTRG.5848,MSTRG.9495
	GO:0019829	cation-transporting ATPase activity	34	10	0.00195	0.22464	MSTRG.11157,MSTRG.1275,MSTRG.1593,MSTRG.1758,MSTRG.1762,MSTRG.1931,MSTRG.219,MSTRG.2798,MSTRG.2959,MSTRG.3401,MSTRG.4089,MSTRG.4095,MSTRG.451,MSTRG.4515,MSTRG.498,MSTRG.5053,MSTRG.5055,MSTRG.5056,MSTRG.5057,MSTRG.5127,MSTRG.5796,MSTRG.5797,MSTRG.6406,MSTRG.6890,MSTRG.7125,MSTRG.763,MSTRG.7709,MSTRG.7721,MSTRG.8380,MSTRG.9120,MSTRG.9427,MSTRG.9489,MSTRG.9490,MSTRG.9491
	GO:0008026	ATP-dependent helicase activity	41	12	0.00256	0.22464	MSTRG.10127,MSTRG.1023,MSTRG.1024,MSTRG.1047,MSTRG.10766,MSTRG.1084,MSTRG.11085,MSTRG.1250,MSTRG.1704,MSTRG.1999,MSTRG.2488,MSTRG.2605,MSTRG.2614,MSTRG.2803,MSTRG.2936,MSTRG.3592,MSTRG.3718,MSTRG.3972,MSTRG.4216,MSTRG.4314,MSTRG.4382,MSTRG.4383,MSTRG.4819,MSTRG.4900,MSTRG.507,MSTRG.613,MSTRG.6167,MSTRG.6199,MSTRG.6298,MSTRG.6324,MSTRG.6567,MSTRG.7322,MSTRG.7368,MSTRG.7553,MSTRG.7641,MSTRG.8113,MS…
	GO:0003678	DNA helicase activity	18	6	0.00583	0.409266	MSTRG.10127,MSTRG.1023,MSTRG.1024,MSTRG.10423,MSTRG.1434,MSTRG.1999,MSTRG.2488,MSTRG.2605,MSTRG.3592,MSTRG.3972,MSTRG.502,MSTRG.507,MSTRG.5848,MSTRG.6167,MSTRG.6199,MSTRG.6298,MSTRG.7322,MSTRG.7641
	GO:0003697	single-stranded DNA binding	8	4	0.00896	0.52416	MSTRG.10127,MSTRG.10423,MSTRG.1434,MSTRG.3528,MSTRG.3972,MSTRG.4050,MSTRG.4215,MSTRG.5175
Biological Process	GO:0006200	ATP catabolic process	94	25	3.6e-05	0.035208	gene1187,gene2839,MSTRG.10036,MSTRG.10037,MSTRG.10094,MSTRG.10127,MSTRG.1023,MSTRG.1024,MSTRG.10272,MSTRG.1047,MSTRG.10766,MSTRG.1084,MSTRG.11085,MSTRG.11249,MSTRG.1250,MSTRG.1576,MSTRG.1704,MSTRG.1882,MSTRG.1995,MSTRG.2055,MSTRG.2249,MSTRG.2416,MSTRG.2515,MSTRG.2605,MSTRG.2614,MSTRG.2789,MSTRG.2803,MSTRG.2936,MSTRG.3190,MSTRG.3191,MSTRG.3330,MSTRG.3380,MSTRG.3458,MSTRG.3479,MSTRG.3693,MSTRG.3718…
	GO:0000727	double-strand break repair via break-induced replication	6	5	0.00011	0.05379	MSTRG.10127,MSTRG.10423,MSTRG.1434,MSTRG.3972,MSTRG.507,MSTRG.5848
	GO:0006270	DNA replication initiation	13	7	0.00024	0.06846	gene217,MSTRG.10127,MSTRG.10423,MSTRG.1434,MSTRG.3972,MSTRG.502,MSTRG.507,MSTRG.5848,MSTRG.7467,MSTRG.8910,MSTRG.9104,MSTRG.9308,MSTRG.9495
	GO:0006267	pre-replicative complex assembly involved in nuclear cell cycle DNA replication	7	5	0.00035	0.06846	MSTRG.10127,MSTRG.10423,MSTRG.1434,MSTRG.3972,MSTRG.507,MSTRG.5848,MSTRG.9495
	GO:0006271	DNA strand elongation involved in DNA replication	7	5	0.00035	0.06846	MSTRG.10127,MSTRG.10423,MSTRG.3972,MSTRG.4230,MSTRG.507,MSTRG.5848,MSTRG.610
	GO:0000070	mitotic sister chromatid segregation	7	4	0.00467	0.76121	MSTRG.1046,MSTRG.1272,MSTRG.1871,MSTRG.1872,MSTRG.4986,MSTRG.7792,MSTRG.8367
Cellular Component	GO:0042555	MCM complex	7	6	1.3e-05	0.002951	MSTRG.10127,MSTRG.10423,MSTRG.1434,MSTRG.3972,MSTRG.502,MSTRG.507,MSTRG.5848
	GO:0031298	replication fork protection complex	6	5	9.7e-05	0.00550475	MSTRG.10127,MSTRG.10423,MSTRG.1434,MSTRG.3972,MSTRG.507,MSTRG.5848
	GO:0031261	DNA replication preinitiation complex	6	5	9.7e-05	0.00550475	MSTRG.10127,MSTRG.10423,MSTRG.1434,MSTRG.3972,MSTRG.507,MSTRG.5848
	GO:0005656	nuclear pre-replicative complex	6	5	9.7e-05	0.00550475	MSTRG.10127,MSTRG.10423,MSTRG.1434,MSTRG.3972,MSTRG.507,MSTRG.5848
	GO:0046809	replication compartment	7	5	0.00031	0.014074	MSTRG.10127,MSTRG.10423,MSTRG.1434,MSTRG.3972,MSTRG.507,MSTRG.5848,MSTRG.9495
	GO:0000793	condensed chromosome	21	6	0.00199	0.0752883	MSTRG.1046,MSTRG.1272,MSTRG.1871,MSTRG.1872,MSTRG.2330,MSTRG.2856,MSTRG.287,MSTRG.3406,MSTRG.3444,MSTRG.4986,MSTRG.5290,MSTRG.6176,MSTRG.6829,MSTRG.7043,MSTRG.7414,MSTRG.7792,MSTRG.7869,MSTRG.8266,MSTRG.8337,MSTRG.9559,MSTRG.9689
	GO:0030686	90S preribosome	10	5	0.00278	0.0901514	MSTRG.10703,MSTRG.1168,MSTRG.2533,MSTRG.2945,MSTRG.3961,MSTRG.452,MSTRG.5904,MSTRG.7672,MSTRG.8410,MSTRG.8411
	GO:0032040	small-subunit processome	11	5	0.00464	0.13166	MSTRG.1432,MSTRG.2429,MSTRG.2533,MSTRG.348,MSTRG.452,MSTRG.5267,MSTRG.5699,MSTRG.5904,MSTRG.8025,MSTRG.8410,MSTRG.8411
	GO:0030687	preribosome, large subunit precursor	8	4	0.00776	0.195724	MSTRG.10703,MSTRG.1168,MSTRG.2015,MSTRG.2768,MSTRG.2945,MSTRG.3328,MSTRG.3815,MSTRG.7074
