# Supplementary material for: Comparative transcriptome analysis revealed genes involved in the fruiting body development of Ophiocordyceps sinensis
Source: PeerJ. 2020 Jan 16;8:e8379. doi: 10.7717/peerj.8379 (PMC6970007; doi:10.7717/peerj.8379)
Supplement: Supplemental Information 4 — FDR < 0.001 and |log2FPKMratio| ≥ 2 were set as the threshold. [file peerj-08-8379-s004.xlsx]

## Sheet: FB_vs_DF
Supplemental information 4-1.DEGs involved in enriched GO terms in FB vs. DF with | log2FC | ≥2, FDR < 0.001.
Gene_ID	representative_transcript_id	representative_transcript_length	KEGG_accession	KEGG_identity	KEGG_description	KOG_accession	KOG_identity	KOG_description	NR_accession	NR_identity	NR_description	SwissProt_accession	SwissProt_identity	SwissProt_description	GO	count_FB-1	count_FB-2	count_DF-1	count_DF-2	TMM_FB-1	TMM_FB-2	TMM_DF-1	TMM_DF-2	FB_vs_DF_logFC	FB_vs_DF_PValue	FB_vs_DF_FDR
MSTRG.879	MSTRG.879.1	1015	mgr:MGG_06420	83.49	MG06420.4; similar to serine/threonine protein kinase FSK; K08286 protein-serine/threonine kinase [EC:2.7.11.-]	SPAC29A4.16	64.91	[D] KOG0590 Checkpoint kinase and related serine/threonine protein kinases	gi|590073031|gb|EXL00556.1|	89.82	HAL protein kinase [Fusarium oxysporum f. sp. raphani 54005]	sp|O14019|HAL4_SCHPO	64.91	Serine/threonine-protein kinase hal4 OS=Schizosaccharomyces pombe (strain 972 / ATCC 24843) GN=hal4 PE=1 SV=1	GO:0004674,GO:0005524,GO:0006468,GO:0009069	38.77	0	410.6	1340.19	5.453	0	49.393	209.393	5.52547	1.08e-05	0.000306149
MSTRG.9968	MSTRG.9968.1	2789	fgr:FG08532.1	82.44	hypothetical protein; K03235 elongation factor 3	YPL226w_2	68.38	[EJ] KOG0062 ATPase component of ABC transporters with duplicated ATPase domains/Translation elongation factor EF-3b	gi|629694293|ref|XP_007812438.1|	86.15	elongation factor 3 [Metarhizium acridum CQMa 102]	sp|Q08972|NEW1_YEAST	48.29	[NU+] prion formation protein 1 OS=Saccharomyces cerevisiae (strain ATCC 204508 / S288c) GN=NEW1 PE=1 SV=1	GO:0003746,GO:0005524,GO:0005634,GO:0005739,GO:0005840,GO:0005844,GO:0006200,GO:0006448,GO:0016887,GO:0042274	207.99	643.94	5000.73	18676.4	9.168	30.853	189.631	919.008	4.78306	6.15e-08	4.09e-06
MSTRG.3348	rna2569-EQL01717.1	1010	pcs:Pc16g04540	52.48	Pc16g04540	Hs6601590	43.01	[R] KOG0510 Ankyrin repeat protein	gi|531864697|gb|EQL01717.1|	100	Ankyrin repeat-containing domain protein [Ophiocordyceps sinensis CO18]	sp|Q9D2X0|ANR39_MOUSE	40	Ankyrin repeat domain-containing protein 39 OS=Mus musculus GN=Ankrd39 PE=2 SV=1	GO:0003700,GO:0005667,GO:0006355,GO:0043565,GO:0045449	6	5	123	135	0.96	0.865	16.718	23.84	4.43249	1.47e-07	8.52e-06
MSTRG.9954	MSTRG.9954.1	1114	fgr:FG10182.1	67.65	hypothetical protein; K01483 ureidoglycolate hydrolase [EC:3.5.3.19]	-	-	-	gi|629690789|ref|XP_007810686.1|	72.68	hypothetical protein MAC_04346 [Metarhizium acridum CQMa 102]	-	-	-	GO:0000256,GO:0004848,GO:0006144	11.91	13.99	296.56	274.46	1.682	2.182	35.904	43.572	4.3331	1.76e-09	2.08e-07
MSTRG.6040	rna4412-EQK99874.1	1476	fgr:FG09791.1	50.1	hypothetical protein	-	-	-	gi|531862024|gb|EQK99874.1|	100	Homeodomain-like protein [Ophiocordyceps sinensis CO18]	-	-	-	GO:0000785,GO:0003677,GO:0003682	68	72	526	1530	6.097	7.023	40.44	152.726	3.86661	6.31e-08	4.17e-06
MSTRG.104	rna92-EQL04193.1	2583	fgr:FG08601.1	86.17	similar to phosphoenolpyruvate carboxykinase; K01610 phosphoenolpyruvate carboxykinase (ATP) [EC:4.1.1.49]	-	-	-	gi|531867435|gb|EQL04193.1|	94.49	phosphoenolpyruvate carboxykinase [Ophiocordyceps sinensis CO18]	sp|Q7RVS9|PCKA_NEUCR	84.47	Phosphoenolpyruvate carboxykinase [ATP] OS=Neurospora crassa (strain ATCC 24698 / 74-OR23-1A / CBS 708.71 / DSM 1257 / FGSC 987) GN=acu-6 PE=3 SV=2	GO:0004612,GO:0005524,GO:0006094,GO:0006099,GO:0015976,GO:0016301,GO:0016310	1054	1611	28723	13032	77.294	128.552	1809.15	1065.46	3.78139	1.11e-09	1.44e-07
MSTRG.502	rna409-EQL03861.1	729	fgr:FG02470.1	65.1	hypothetical protein; K02542 minichromosome maintenance protein 6	SPBC211.04c	33.14	[L] KOG0480 DNA replication licensing factor, MCM6 component	gi|531867089|gb|EQL03861.1|	90.91	DNA replication licensing factor mcm6 [Ophiocordyceps sinensis CO18]	sp|P49731|MCM6_SCHPO	33.14	DNA replication licensing factor mcm6 OS=Schizosaccharomyces pombe (strain 972 / ATCC 24843) GN=mcm6 PE=1 SV=2	GO:0003677,GO:0003678,GO:0005524,GO:0005634,GO:0005657,GO:0006270,GO:0032508,GO:0042555	38	32	366	591	9.326	8.591	76.39	160.376	3.71719	4.07e-08	2.99e-06
MSTRG.8009	rna5599-EQK98687.1	543	bfu:BC1G_01237	51.7	hypothetical protein	-	-	-	gi|531859702|gb|EQK98687.1|	89.44	bZIP transcription factor (Fcr3) [Ophiocordyceps sinensis CO18]	sp|Q8X229|FCR3_CANAX	35.44	Fluconazole resistance protein 3 OS=Candida albicans GN=FCR3 PE=3 SV=1	GO:0003700,GO:0005667,GO:0006355,GO:0043565,GO:0045449	0	7.68	63.12	53.96	0	3.424	21.551	23.996	3.68796	0.000546677	0.00647076
MSTRG.2798	MSTRG.2798.1	4398	fgr:FG04995.1	72.78	hypothetical protein	SPBC839.06	46.18	[P] KOG0202 Ca2+ transporting ATPase	gi|531865190|gb|EQL02121.1|	99.53	calcium-transporting ATPase 3 [Ophiocordyceps sinensis CO18]	sp|P22189|ATC3_SCHPO	46.18	Calcium-transporting ATPase 3 OS=Schizosaccharomyces pombe (strain 972 / ATCC 24843) GN=cta3 PE=1 SV=1	GO:0005524,GO:0005849,GO:0008440,GO:0016021,GO:0016310,GO:0019829,GO:0031124,GO:0046872,GO:0098655	426	335	3242.48	6533.81	13.492	10.51	86.558	234.675	3.65385	1.29e-08	1.21e-06
MSTRG.6374	rna4624-EQK99667.1	1084	fgr:FG01555.1	60.43	hypothetical protein	-	-	-	gi|531861696|gb|EQK99667.1|	94.93	ribonuclease Z [Ophiocordyceps sinensis CO18]	-	-	-	GO:0003700,GO:0005667,GO:0006355,GO:0043565,GO:0045449	69	175	778	2207	9.506	26.275	91.68	337.788	3.58386	1.41e-06	5.77e-05
MSTRG.6725	MSTRG.6725.1	3363	fgr:FG10327.1	73.55	similar to chitin synthase class I; K00698 chitin synthase [EC:2.4.1.16]	SPAC13G6.12c	50.7	[M] KOG2571 Chitin synthase/hyaluronan synthase (glycosyltransferases)	gi|531861336|gb|EQK99432.1|	94.13	glycosyltransferase family 2 protein [Ophiocordyceps sinensis CO18]	sp|P30588|CHS3_NEUCR	74.21	Chitin synthase 3 OS=Neurospora crassa (strain ATCC 24698 / 74-OR23-1A / CBS 708.71 / DSM 1257 / FGSC 987) GN=chs-3 PE=3 SV=2	GO:0004100,GO:0006031	606.72	417.68	3588.6	8091.84	26.34	19.728	134.662	395.27	3.4936	1.34e-07	7.93e-06
MSTRG.1650	rna1330-EQL02939.1	1643	bmy:Bm1_31570	33.74	Cam kinase protein 1; K08794 calcium/calmodulin-dependent protein kinase I [EC:2.7.11.17]	CE25046	35.06	[T] KOG0032 Ca2+/calmodulin-dependent protein kinase, EF-Hand protein superfamily	gi|531866102|gb|EQL02939.1|	99.62	Protein kinase-like domain protein [Ophiocordyceps sinensis CO18]	sp|Q9TXJ0|CMK1_CAEEL	35.06	Calcium/calmodulin-dependent protein kinase type 1 OS=Caenorhabditis elegans GN=cmk-1 PE=1 SV=1	GO:0004674,GO:0005524,GO:0006468,GO:0009069	103	132	746	1515	8.456	11.789	52.547	138.533	3.22504	3.65e-07	1.87e-05
MSTRG.10037	MSTRG.10037.1	3287	fgr:FG06330.1	82.84	MSH2_NEUCR DNA mismatch repair protein MSH2; K08735 DNA mismatch repair protein MSH2	YOL090w	44.43	[L] KOG0219 Mismatch repair ATPase MSH2 (MutS family)	gi|594723418|gb|EXV06304.1|	84.89	mismatch repair ATPase (MutS family) [Metarhizium robertsii]	sp|O13396|MSH2_NEUCR	78.14	DNA mismatch repair protein msh-2 OS=Neurospora crassa (strain ATCC 24698 / 74-OR23-1A / CBS 708.71 / DSM 1257 / FGSC 987) GN=msh-2 PE=3 SV=1	GO:0000228,GO:0000400,GO:0000403,GO:0000404,GO:0000406,GO:0000710,GO:0000735,GO:0005524,GO:0006200,GO:0006311,GO:0016887,GO:0030466,GO:0032137,GO:0032138,GO:0032301,GO:0032302	23.24	27.21	189.97	268.89	0.881	1.116	6.169	11.34	3.12168	1.16e-05	0.000323708
MSTRG.1272	MSTRG.1272.1	5758	fgr:FG06754.1	76.08	hypothetical protein; K06669 structural maintenance of chromosome 3 (chondroitin sulfate proteoglycan 6)	SPAC10F6.09c	41.4	[D] KOG0964 Structural maintenance of chromosome protein 3 (sister chromatid cohesion complex Cohesin, subunit SMC3)	gi|531866417|gb|EQL03224.1|	98.05	RecF/RecN/SMC [Ophiocordyceps sinensis CO18]	sp|Q00737|SUDA_EMENI	52.42	Chromosome segregation protein sudA OS=Emericella nidulans (strain FGSC A4 / ATCC 38163 / CBS 112.46 / NRRL 194 / M139) GN=sudA PE=2 SV=3	GO:0000785,GO:0003682,GO:0005524,GO:0006281,GO:0007064,GO:0008280	204.07	206.31	1289.15	2348.2	6.639	7.437	34.976	84.165	3.1045	1.29e-07	7.69e-06
MSTRG.4397	MSTRG.4397.1	3074	mgr:MGG_03619	79.97	MG03619.4; hypothetical protein	SPAC17A2.05	48.89	[C] KOG2404 Fumarate reductase, flavoprotein subunit	gi|531863772|gb|EQL00985.1|	97.07	flavocytochrome c [Ophiocordyceps sinensis CO18]	sp|O13755|OSM1_SCHPO	48.89	Fumarate reductase OS=Schizosaccharomyces pombe (strain 972 / ATCC 24843) GN=osm1 PE=3 SV=1	GO:0000104,GO:0006118,GO:0006119,GO:0018874,GO:0019643,GO:0020037,GO:0045281	1766	1248	10992	13010	90.515	63.373	497.576	772.01	2.91755	4.25e-07	2.14e-05
MSTRG.10423	MSTRG.10423.1	1909	pan:PODANSg9150	84.84	hypothetical protein; K02540 minichromosome maintenance protein 2	SPBC4.04c	60.84	[L] KOG0477 DNA replication licensing factor, MCM2 component	gi|629684509|ref|XP_007807550.1|	84.12	DNA replication licensing factor mcm2 [Metarhizium acridum CQMa 102]	sp|P40377|MCM2_SCHPO	60.84	DNA replication licensing factor mcm2 OS=Schizosaccharomyces pombe (strain 972 / ATCC 24843) GN=mcm2 PE=1 SV=1	GO:0000727,GO:0000785,GO:0003678,GO:0003682,GO:0003688,GO:0003697,GO:0005524,GO:0005656,GO:0005737,GO:0006267,GO:0006270,GO:0006271,GO:0031261,GO:0031298,GO:0032508,GO:0042555,GO:0046809	287	200	1506	2290	19.905	15.088	89.741	177.109	2.91016	2.61e-07	1.4e-05
MSTRG.5053	MSTRG.5053.1	3032	fgr:FG01425.1	86.14	PMA1_NEUCR Plasma membrane ATPase (Proton pump); K01535 H+-transporting ATPase [EC:3.6.3.6]	YGL008c	75.79	[P] KOG0205 Plasma membrane H+-transporting ATPase	gi|590045136|gb|EXK46994.1|	85.79	plasma membrane ATPase [Fusarium oxysporum f. sp. melonis 26406]	sp|P07038|PMA1_NEUCR	83.51	Plasma membrane ATPase OS=Neurospora crassa (strain ATCC 24698 / 74-OR23-1A / CBS 708.71 / DSM 1257 / FGSC 987) GN=pma-1 PE=1 SV=1	GO:0005524,GO:0006200,GO:0006754,GO:0016021,GO:0019829,GO:0046872,GO:0098655	9100.28	9240.52	80933.2	65099.3	502.06	554.907	3811.82	3980.08	2.87006	3.03e-07	1.59e-05
MSTRG.10791	rna6862-EQK97424.1	838	fgr:FG02538.1	66.46	hypothetical protein	-	-	-	gi|531852766|gb|EQK97424.1|	100	MYB DNA-binding domain-containing protein [Ophiocordyceps sinensis CO18]	-	-	-	GO:0000785,GO:0003677,GO:0003682	10	48	208	246	2.269	11.877	40.088	61.642	2.85161	0.000511396	0.00616434
MSTRG.10317	MSTRG.10317.1	769	fgr:FG01964.1	86.59	similar to AF484941_1 class V chitin synthase; K00698 chitin synthase [EC:2.4.1.16]	-	-	-	gi|94469539|gb|ABF20219.1|	93.9	class V chitin synthase [Neotyphodium lolii]	-	-	-	GO:0003774,GO:0005524,GO:0008152,GO:0016459	96	34	472	514	19.397	7.5	81.252	114.996	2.84937	1.99e-05	0.000489596
MSTRG.10127	MSTRG.10127.1	2730	fgr:FG00504.1	88.22	hypothetical protein; K02212 minichromosome maintenance protein 4 (cell division control protein 54)	YPR019w	69.97	[L] KOG0478 DNA replication licensing factor, MCM4 component	gi|672385536|gb|KFG87623.1|	89.32	cell division control protein 54 [Metarhizium anisopliae]	sp|P29458|MCM4_SCHPO	73.15	DNA replication licensing factor mcm4 OS=Schizosaccharomyces pombe (strain 972 / ATCC 24843) GN=mcm4 PE=1 SV=2	GO:0000727,GO:0003688,GO:0003697,GO:0005524,GO:0005656,GO:0005737,GO:0006200,GO:0006267,GO:0006268,GO:0006270,GO:0006271,GO:0009378,GO:0009379,GO:0031261,GO:0031298,GO:0042555,GO:0043140,GO:0043142,GO:0046809,GO:0051301	351	242	1425	2780	16.529	12.391	57.733	146.162	2.79653	2.7e-06	9.85e-05
MSTRG.5229	MSTRG.5229.1	1434	pan:PODANSg3118	77.71	hypothetical protein; K00606 3-methyl-2-oxobutanoate hydroxymethyltransferase [EC:2.1.2.11]	At3g61530	48.17	[H] KOG2949 Ketopantoate hydroxymethyltransferase	gi|531863004|gb|EQL00410.1|	95.01	Ketopantoate hydroxymethyltransferase [Ophiocordyceps sinensis CO18]	sp|Q9Y7B6|PANB_EMENI	63.61	3-methyl-2-oxobutanoate hydroxymethyltransferase OS=Emericella nidulans (strain FGSC A4 / ATCC 38163 / CBS 112.46 / NRRL 194 / M139) GN=panB PE=3 SV=1	GO:0003864,GO:0008168,GO:0015940,GO:0032259	231	212	721	2345	23.202	24.168	66.547	286.921	2.794	3.86e-05	0.00085067
MSTRG.1872	MSTRG.1872.2	2354	fgr:FG07115.1	71.4	hypothetical protein; K06676 condensin complex subunit 2	SPCC306.03c	62.5	[BD] KOG2328 Chromosome condensation complex Condensin, subunit H	gi|531865949|gb|EQL02797.1|	100	condensin complex component cnd2 [Ophiocordyceps sinensis CO18]	sp|Q9Y7R3|CND2_SCHPO	62.5	Condensin complex subunit 2 OS=Schizosaccharomyces pombe (strain 972 / ATCC 24843) GN=cnd2 PE=1 SV=1	GO:0000796,GO:0007076,GO:0051301	643	379	3687	3791	39.889	25.823	196.44	269.007	2.78519	6.91e-07	3.25e-05
MSTRG.2849	MSTRG.2849.1	817	fgr:FG05035.1	94.03	hypothetical protein; K06215 pyridoxine biosynthesis protein [EC:4.-.-.-]	SPAC29B12.04	69.09	[H] KOG1606 Stationary phase-induced protein, SOR/SNZ family	gi|531865148|gb|EQL02084.1|	100	pyridoxine biosynthesis protein [Ophiocordyceps sinensis CO18]	sp|O59905|PDX1_CERNC	70.9	Pyridoxine biosynthesis protein PDX1 OS=Cercospora nicotianae GN=PDX1 PE=1 SV=1	GO:0003824,GO:0042823	96.39	122.48	852.93	722.47	22.592	31.392	170.074	187.278	2.72875	1.32e-06	5.49e-05
MSTRG.507	rna408-EQL03860.1	1944	fgr:FG02470.1	79.08	hypothetical protein; K02542 minichromosome maintenance protein 6	SPBC211.04c	59.6	[L] KOG0480 DNA replication licensing factor, MCM6 component	gi|531867088|gb|EQL03860.1|	96.45	DNA replication licensing factor mcm6 [Ophiocordyceps sinensis CO18]	sp|P49731|MCM6_SCHPO	59.6	DNA replication licensing factor mcm6 OS=Schizosaccharomyces pombe (strain 972 / ATCC 24843) GN=mcm6 PE=1 SV=2	GO:0000727,GO:0003688,GO:0005524,GO:0005656,GO:0005737,GO:0006200,GO:0006267,GO:0006268,GO:0006270,GO:0006271,GO:0009378,GO:0009379,GO:0031261,GO:0031298,GO:0042555,GO:0043140,GO:0043142,GO:0046809	284	314	1388	2437	19.363	23.302	81.326	185.334	2.62757	4.01e-06	0.000139015
MSTRG.4991	rna3718-EQL00567.1	1121	fgr:FG08775.1	57.37	hypothetical protein	SPBC13E7.02_2	33.75	[R] KOG3138 Predicted N-acetyltransferase	gi|531863219|gb|EQL00567.1|	100	GCN5-related N acetyltransferase [Ophiocordyceps sinensis CO18]	sp|Q9P6R8|CWC24_SCHPO	32.93	Pre-mRNA-splicing factor cwf24 OS=Schizosaccharomyces pombe (strain 972 / ATCC 24843) GN=cwf24 PE=1 SV=1	GO:0008080,GO:0042967	128	164	347	1338	18.934	26.45	43.892	219.834	2.53438	0.000524698	0.0062529
MSTRG.2850	rna2199-EQL02084.1	465	fgr:FG05035.1	94.81	hypothetical protein; K06215 pyridoxine biosynthesis protein [EC:4.-.-.-]	SPAC29B12.04	62.34	[H] KOG1606 Stationary phase-induced protein, SOR/SNZ family	gi|531865148|gb|EQL02084.1|	100	pyridoxine biosynthesis protein [Ophiocordyceps sinensis CO18]	sp|O59905|PDX1_CERNC	74.68	Pyridoxine biosynthesis protein PDX1 OS=Cercospora nicotianae GN=PDX1 PE=1 SV=1	GO:0003824,GO:0042823	88.61	79.52	537.07	492.53	38.85	38.34	197.841	236.316	2.49872	1.84e-05	0.000463613
MSTRG.7927	MSTRG.7927.1	2336	nfi:NFIA_031150	45.07	hypothetical protein	-	-	-	gi|531859820|gb|EQK98725.1|	89.9	basic-Leucine zipper transcription factor [Ophiocordyceps sinensis CO18]	-	-	-	GO:0003700,GO:0005667,GO:0006355,GO:0043565,GO:0045449	702	718	4351	4257.54	48.187	53.478	264.295	331.266	2.49629	3.4e-06	0.000120062
MSTRG.1497	MSTRG.1497.1	3309	fgr:FG00792.1	70.96	hypothetical protein	YPL140c	35.67	[T] KOG0581 Mitogen-activated protein kinase kinase (MAP2K)	gi|531866262|gb|EQL03086.1|	100	serine/threonine protein kinase-like protein [Ophiocordyceps sinensis CO18]	sp|Q55CE0|MKCF_DICDI	30.17	Probable serine/threonine-protein kinase mkcF OS=Dictyostelium discoideum GN=mkcF PE=3 SV=1	GO:0004674,GO:0005524,GO:0006468,GO:0009069	1854	1156	11470	6803	70.113	47.721	556.321	440.117	2.45983	1.08e-05	0.000306392
MSTRG.4230	MSTRG.4230.1	5017	fgr:FG09509.1	79.11	hypothetical protein; K10742 DNA replication ATP-dependent helicase Dna2 [EC:3.6.4.12]	YHR164c	38.55	[L] KOG1805 DNA replication helicase	gi|531863911|gb|EQL01088.1|	99.89	DNA replication factor Dna2 [Ophiocordyceps sinensis CO18]	sp|P38859|DNA2_YEAST	38.55	DNA replication ATP-dependent helicase/nuclease DNA2 OS=Saccharomyces cerevisiae (strain ATCC 204508 / S288c) GN=DNA2 PE=1 SV=1	GO:0000737,GO:0004386,GO:0006200,GO:0017108,GO:0033567,GO:0043142	194	118	641	1074	4.923	3.248	13.87	30.194	2.41757	6.25e-05	0.00121821
MSTRG.5225	MSTRG.5225.1	3881	fgr:FG09311.1	65.98	hypothetical protein	At3g10340	38.4	[Q] KOG0222 Phenylalanine and histidine ammonia-lyase	gi|531863002|gb|EQL00408.1|	100	phenylalanine ammonia-lyase [Ophiocordyceps sinensis CO18]	sp|P11544|PALY_RHOTO	39.16	Phenylalanine/tyrosine ammonia-lyase OS=Rhodosporidium toruloides GN=PAL PE=1 SV=2	GO:0005737,GO:0006559,GO:0006570,GO:0009800,GO:0009821,GO:0045548	672.62	522.19	2095.05	4208.63	27.774	21.283	73.737	198.597	2.37003	8.46e-05	0.00153989
MSTRG.1434	MSTRG.1434.1	2331	fgr:FG06777.1	87.55	hypothetical protein; K02209 minichromosome maintenance protein 5 (cell division control protein 46)	SPAC3F10.01	64.78	[L] KOG0481 DNA replication licensing factor, MCM5 component	gi|531866310|gb|EQL03127.1|	99.37	DNA replication licensing factor mcm5 [Ophiocordyceps sinensis CO18]	sp|P41389|MCM5_SCHPO	64.78	DNA replication licensing factor mcm5 OS=Schizosaccharomyces pombe (strain 972 / ATCC 24843) GN=mcm5 PE=1 SV=2	GO:0000727,GO:0000784,GO:0000785,GO:0003678,GO:0003682,GO:0003688,GO:0003697,GO:0005524,GO:0005656,GO:0005737,GO:0006267,GO:0006343,GO:0030174,GO:0031261,GO:0031298,GO:0031939,GO:0032508,GO:0042555,GO:0046809	365	450	1505	2685	21.226	28.47	75.166	174.214	2.31145	5.65e-05	0.00113264
MSTRG.4462	MSTRG.4462.1	2496	fgr:FG01839.1	70.3	hypothetical protein; K02685 DNA primase large subunit [EC:2.7.7.-]	SPBC17D11.06	45.89	[L] KOG2267 Eukaryotic-type DNA primase, large subunit	gi|531863706|gb|EQL00939.1|	94.39	DNA primase large subunit [Ophiocordyceps sinensis CO18]	sp|Q8NIZ4|PRI2_NEUCR	68.28	Probable DNA primase large subunit OS=Neurospora crassa (strain ATCC 24698 / 74-OR23-1A / CBS 708.71 / DSM 1257 / FGSC 987) GN=5F3.150 PE=3 SV=1	GO:0003896,GO:0005657,GO:0005730,GO:0006269,GO:0006351	95	44	252	450	6.56	3.286	15.141	36.831	2.30466	0.000783686	0.00854405
MSTRG.7792	rna5495-EQK98791.1	3169	fgr:FG02510.1	77.3	hypothetical protein; K06678 condensin complex subunit 3	SPCC188.03	33.83	[BD] KOG2025 Chromosome condensation complex Condensin, subunit G	gi|531860009|gb|EQK98791.1|	99.78	Armadillo-type fold protein [Ophiocordyceps sinensis CO18]	sp|Q10429|CND3_SCHPO	33.83	Condensin complex subunit 3 OS=Schizosaccharomyces pombe (strain 972 / ATCC 24843) GN=cnd3 PE=1 SV=1	GO:0000796,GO:0007076	390	219	1570	1616	15.332	9.356	53.113	70.944	2.30195	1.88e-05	0.000470701
MSTRG.10887	MSTRG.10887.1	2103	fgr:FG01964.1	79.65	similar to AF484941_1 class V chitin synthase; K00698 chitin synthase [EC:2.4.1.16]	Hs11037057	23.78	[N] KOG4229 Myosin VII, myosin IXB and related myosins	gi|672382450|gb|KFG84576.1|	84.96	class V chitin synthase [Metarhizium anisopliae]	sp|Q4P9K9|CHS8_USTMA	31.25	Chitin synthase 8 OS=Ustilago maydis (strain 521 / FGSC 9021) GN=CHS8 PE=3 SV=1	GO:0003677,GO:0003774,GO:0004100,GO:0005524,GO:0006031,GO:0016459,GO:0020037	1062	631	4117	4591	63.723	41.187	212.342	307.322	2.28482	4.02e-05	0.000880092
MSTRG.1871	MSTRG.1871.1	1646	mgr:MGG_01639	55.11	MG01639.4; hypothetical protein; K06676 condensin complex subunit 2	YBL097w	33.82	[BD] KOG2328 Chromosome condensation complex Condensin, subunit H	gi|531865948|gb|EQL02796.1|	85.8	condensin complex component cnd2 [Ophiocordyceps sinensis CO18]	sp|P38170|CND2_YEAST	33.82	Condensin complex subunit 2 OS=Saccharomyces cerevisiae (strain ATCC 204508 / S288c) GN=BRN1 PE=1 SV=3	GO:0000796,GO:0007076	396.82	221.51	1418.23	1719.42	97.007	63.285	302.435	466.068	2.2724	3.41e-05	0.000775715
MSTRG.772	rna628-EQL03673.1	2405	fgr:FG09899.1	68.97	hypothetical protein; K02325 DNA polymerase epsilon subunit 2 [EC:2.7.7.7]	YPR175w	48.24	[L] KOG3818 DNA polymerase epsilon, subunit B	gi|531866891|gb|EQL03673.1|	94.68	DNA polymerase alpha/epsilon, subunit B [Ophiocordyceps sinensis CO18]	sp|Q6C030|DPB2_YARLI	27.37	DNA polymerase epsilon subunit B OS=Yarrowia lipolytica (strain CLIB 122 / E 150) GN=DPB2 PE=3 SV=1	GO:0003677,GO:0003887,GO:0006260,GO:0042575,GO:0071897	107	100	352	666	9.495	9.67	26.812	65.864	2.2574	0.000396029	0.00507426
MSTRG.1531	MSTRG.1531.1	4094	fgr:FG05088.1	86.2	similar to kinesin	SPAC1834.07	65.57	[Z] KOG0240 Kinesin (SMY1 subfamily)	gi|531866221|gb|EQL03048.1|	99.88	kinesin [Ophiocordyceps sinensis CO18]	sp|Q86Z98|KINH_GIBMO	87.28	Kinesin heavy chain OS=Gibberella moniliformis GN=KLP1 PE=3 SV=1	GO:0003777,GO:0005524,GO:0005737,GO:0005871,GO:0005874,GO:0007018,GO:0008017,GO:0008152,GO:0045298	1012	1358	4532	7087	35.553	52.462	137.538	278.403	2.22927	0.000134399	0.0021742
MSTRG.8476	MSTRG.8476.2	6650	fgr:FG01433.1	89.11	similar to T49818 glutamate synthase (NADH2) (EC 1.4.1.14) B24H17.40 precursor [similarity] - Neurospora crassa; K00264 glutamate synthase (NADPH/NADH) [EC:1.4.1.13 1.4.1.14]	SPAPB1E7.07	69.17	[E] KOG0399 Glutamate synthase	gi|531858976|gb|EQK98430.1|	98.26	glutamate synthase [Ophiocordyceps sinensis CO18]	sp|Q9C102|GLT1_SCHPO	69.17	Putative glutamate synthase [NADPH] OS=Schizosaccharomyces pombe (strain 972 / ATCC 24843) GN=glt1 PE=2 SV=1	GO:0005506,GO:0005739,GO:0006118,GO:0006537,GO:0010181,GO:0016040,GO:0019676,GO:0050660,GO:0051536,GO:0055114	1120	573	3897	4437	37.066	21.233	103.935	153.415	2.22683	8.9e-05	0.00160753
MSTRG.4283	MSTRG.4283.2	8365	fgr:FG05996.1	68.54	hypothetical protein	At2g01830	38.25	[T] KOG0519 Sensory transduction histidine kinase	gi|531863877|gb|EQL01061.1|	98.18	ATPase-like, ATP-binding domain protein [Ophiocordyceps sinensis CO18]	sp|Q86CZ2|DHKK_DICDI	34.73	Hybrid signal transduction histidine kinase K OS=Dictyostelium discoideum GN=dhkK PE=1 SV=1	GO:0000155,GO:0000160,GO:0004674,GO:0005524,GO:0006468,GO:0009069,GO:0009365,GO:0016020,GO:0023014	646	594	2584	3458	9.292	9.231	32.397	56.803	2.2144	5.41e-05	0.00109793
MSTRG.9104	MSTRG.9104.4	4142	pan:PODANSg6163	66.49	hypothetical protein; K06628 cell division control protein 45	SPAC17D4.02	39.95	[L] KOG2475 CDC45 (cell division cycle 45)-like protein	gi|531857793|gb|EQK98113.1|	94.02	CDC45 family [Ophiocordyceps sinensis CO18]	sp|O74113|CDC45_SCHPO	39.95	Cell division control protein 45 homolog OS=Schizosaccharomyces pombe (strain 972 / ATCC 24843) GN=sna41 PE=1 SV=1	GO:0005509,GO:0006270,GO:0051301	261.22	120.77	924.75	928.57	17.534	8.817	45.163	59.75	2.19478	0.000128703	0.00211794
MSTRG.6783	MSTRG.6783.1	853	mgr:MGG_09550	77.66	MG09550.4; homoserine kinase, putative; K00872 homoserine kinase [EC:2.7.1.39]	YHR025w	52.75	[E] KOG1537 Homoserine kinase	gi|358390201|gb|EHK39607.1|	88.17	hypothetical protein TRIATDRAFT_133259 [Trichoderma atroviride IMI 206040]	sp|P17423|KHSE_YEAST	52.75	Homoserine kinase OS=Saccharomyces cerevisiae (strain ATCC 204508 / S288c) GN=THR1 PE=1 SV=4	GO:0000166,GO:0006566,GO:0016301	91	51	342	332	15.998	9.783	51.323	64.725	2.15333	0.000556927	0.00656248
MSTRG.5090	MSTRG.5090.1	4767	fgr:FG10269.1	88.82	hypothetical protein	YOR304w	56.14	[K] KOG0385 Chromatin remodeling complex WSTF-ISWI, small subunit	gi|531863130|gb|EQL00508.1|	95.78	chromatin remodelling complex ATPase chain ISW1 [Ophiocordyceps sinensis CO18]	sp|Q5A310|ISW2_CANAL	55.51	ISWI chromatin-remodeling complex ATPase ISW2 OS=Candida albicans (strain SC5314 / ATCC MYA-2876) GN=ISW2 PE=2 SV=1	GO:0000785,GO:0003677,GO:0005524,GO:0005634,GO:0008152,GO:0016818,GO:0031491,GO:0043044	1118.64	950.68	4128.96	5445.13	29.863	27.529	95.548	163.846	2.1398	0.00011086	0.00189872
MSTRG.4990	MSTRG.4990.1	1684	aor:AOR_1_6174	63.25	AO090005000005; serine-threonine protein kinase	SPBC530.14c	26.79	[T] KOG1290 Serine/threonine protein kinase	gi|531863218|gb|EQL00566.1|	99.18	serine/threonine protein kinase [Ophiocordyceps sinensis CO18]	sp|P36616|DSK1_SCHPO	26.79	Protein kinase dsk1 OS=Schizosaccharomyces pombe (strain 972 / ATCC 24843) GN=dsk1 PE=3 SV=2	GO:0004674,GO:0005524,GO:0006468,GO:0009069	365	115	1313	953	31.026	10.623	95.956	90.185	2.12991	0.000424457	0.00532422
MSTRG.2446	MSTRG.2446.2	6927	fgr:FG10189.1	80.77	hypothetical protein	7302884	53.81	[Z] KOG0245 Kinesin-like protein	gi|531865483|gb|EQL02380.1|	100	kinesin [Ophiocordyceps sinensis CO18]	sp|Q7PHR1|KIF1A_ANOGA	53.94	Kinesin-like protein unc-104 OS=Anopheles gambiae GN=unc-104 PE=3 SV=3	GO:0003777,GO:0005524,GO:0005871,GO:0005874,GO:0007018,GO:0008017,GO:0008152,GO:0045298	694.92	602.2	2659.5	3301.51	14.745	14.611	49.69	81.05	2.12446	8.4e-05	0.00153667
MSTRG.8692	MSTRG.8692.1	3110	ncr:NCU06971	58.86	transcriptional activator xlnR	-	-	-	gi|531858637|gb|EQK98330.1|	98.11	XlnR [Ophiocordyceps sinensis CO18]	sp|A1DIC0|XLNR_NEOFI	54.95	Xylanolytic transcriptional activator xlnR OS=Neosartorya fischeri (strain ATCC 1020 / DSM 3700 / FGSC A1164 / NRRL 181) GN=xlnR PE=3 SV=2	GO:0003677,GO:0005634,GO:0006355,GO:0006366,GO:0008270	674	536	3220	2499	75.002	62.433	295.848	313.436	2.11962	4.5e-05	0.000958023
MSTRG.9403	MSTRG.9403.1	4191	fgr:FG01877.1	75.28	hypothetical protein	YLR131c	34.88	[R] KOG1721 FOG: Zn-finger	gi|531857204|gb|EQK97946.1|	100	zinc finger domain-containing protein [Ophiocordyceps sinensis CO18]	sp|P21192|ACE2_YEAST	34.88	Metallothionein expression activator OS=Saccharomyces cerevisiae (strain ATCC 204508 / S288c) GN=ACE2 PE=1 SV=1	GO:0003676,GO:0003700,GO:0005634,GO:0005667,GO:0006355,GO:0045449	1873	2801	8908	12435	89.42	147.578	370.327	694.001	2.11366	0.000289988	0.00395915
MSTRG.10681	MSTRG.10681.1	2838	fgr:FG01234.1	75.2	similar to adenylate cyclase, ACY; K01768 adenylate cyclase [EC:4.6.1.1]	SPBC19C7.03_2	32.33	[T] KOG0618 Serine/threonine phosphatase 2C containing leucine-rich repeats, similar to SCN circadian oscillatory protein (SCOP)	gi|672384764|gb|KFG86858.1|	73.09	adenylate cyclase, ACY [Metarhizium anisopliae]	sp|Q01631|CYAA_NEUCR	52.82	Adenylate cyclase OS=Neurospora crassa (strain ATCC 24698 / 74-OR23-1A / CBS 708.71 / DSM 1257 / FGSC 987) GN=cr-1 PE=3 SV=2	GO:0000287,GO:0004016,GO:0006144,GO:0006171,GO:0035556	282	138	1006	926	13.176	7.011	40.422	48.285	2.10771	0.000165243	0.00254756
MSTRG.5056	MSTRG.5056.1	1080	fgr:FG01425.1	91.09	PMA1_NEUCR Plasma membrane ATPase (Proton pump); K01535 H+-transporting ATPase [EC:3.6.3.6]	SPAC1071.10c	76.92	[P] KOG0205 Plasma membrane H+-transporting ATPase	gi|573992303|ref|XP_006674072.1|	93	Plasma membrane ATPase (Proton pump) [Cordyceps militaris CM01]	sp|P07038|PMA1_NEUCR	87.85	Plasma membrane ATPase OS=Neurospora crassa (strain ATCC 24698 / 74-OR23-1A / CBS 708.71 / DSM 1257 / FGSC 987) GN=pma-1 PE=1 SV=1	GO:0005524,GO:0006200,GO:0006754,GO:0016021,GO:0019829,GO:0046872,GO:0098655	4223.5	6304	27372	22106	585.271	952.329	3244.91	3403.78	2.10085	0.00016466	0.00254591
MSTRG.8549	MSTRG.8549.1	1473	mgr:MGG_07707	69.18	MG07707.4; hypothetical protein; K01120 3',5'-cyclic-nucleotide phosphodiesterase [EC:3.1.4.17]	-	-	-	gi|594716829|gb|EXU99730.1|	87.18	cAMP phosphodiesterases class-II domain protein [Metarhizium robertsii]	sp|P36599|PDE1_SCHPO	35.21	3',5'-cyclic-nucleotide phosphodiesterase OS=Schizosaccharomyces pombe (strain 972 / ATCC 24843) GN=cgs2 PE=3 SV=1	GO:0004115,GO:0006198	293	311	1026	1610	29.66	36.559	96.179	201.586	2.06671	0.000177003	0.00269327
MSTRG.7605	MSTRG.7605.1	3476	fgr:FG07175.1	84.82	hypothetical protein; K02327 DNA polymerase delta subunit 1 [EC:2.7.7.7]	SPBC336.04	64.33	[L] KOG0969 DNA polymerase delta, catalytic subunit	gi|531860249|gb|EQK98892.1|	97.03	DNA polymerase delta catalytic subunit [Ophiocordyceps sinensis CO18]	sp|P30316|DPOD_SCHPO	64.33	DNA polymerase delta catalytic subunit OS=Schizosaccharomyces pombe (strain 972 / ATCC 24843) GN=pol3 PE=1 SV=2	GO:0000166,GO:0003677,GO:0003887,GO:0006260,GO:0042575,GO:0071897	341	235	1166	1337	12.295	9.206	36.228	53.981	2.04035	0.000115424	0.00196408
MSTRG.8270	MSTRG.8270.2	4188	pan:PODANSg09666	58.33	hypothetical protein; K12236 transcriptional repressor NF-X1 [EC:6.3.2.-]	SPCC18.03	41.9	[K] KOG1952 Transcription factor NF-X1, contains NFX-type Zn2+-binding and R3H domains	gi|531859284|gb|EQK98547.1|	100	zinc finger domain-containing protein [Ophiocordyceps sinensis CO18]	sp|O74853|FAP1H_SCHPO	41.9	FKBP12-associated protein 1 homolog OS=Schizosaccharomyces pombe (strain 972 / ATCC 24843) GN=fap1 PE=1 SV=1	GO:0005488,GO:0006351,GO:0010556,GO:0016881	283	189	926	1104	10.342	6.283	28.714	52.037	2.02981	0.000198439	0.00294267
MSTRG.6232	MSTRG.6232.1	10307	fgr:FG09406.1	66.06	hypothetical protein; K03128 transcription initiation factor TFIID subunit 2	SPAC3A12.05c	32.85	[K] KOG1932 TATA binding protein associated factor	gi|531861840|gb|EQK99760.1|	100	hypothetical protein OCS_04528 [Ophiocordyceps sinensis CO18]	sp|P87121|TAF2_SCHPO	32.85	Transcription initiation factor TFIID subunit 2 OS=Schizosaccharomyces pombe (strain 972 / ATCC 24843) GN=taf2 PE=3 SV=3	GO:0003743,GO:0005634,GO:0005840,GO:0006355,GO:0006446	5927	4941	17038	27838	696.797	522.023	1872.48	4040.78	1.99703	0.000641119	0.00736445
MSTRG.3961	MSTRG.3961.1	2465	fgr:FG09795.1	68.27	hypothetical protein; K14569 ribosome biogenesis protein BMS1	SPBC31E1.06	39.84	[J] KOG1951 GTP-binding protein AARP2 involved in 40S ribosome biogenesis	gi|322707405|gb|EFY98983.1|	72.13	ribosome biogenesis protein (Bms1) [Metarhizium anisopliae ARSEF 23]	sp|O94653|BMS1_SCHPO	39.84	Ribosome biogenesis protein bms1 OS=Schizosaccharomyces pombe (strain 972 / ATCC 24843) GN=bms1 PE=1 SV=2	GO:0003924,GO:0005525,GO:0005634,GO:0005739,GO:0006184,GO:0006364,GO:0030686,GO:0034511,GO:0042255	477	640	1909	2757	25.392	37.061	87.403	163.814	1.99066	0.000335941	0.00447595
MSTRG.802	MSTRG.802.1	3440	fgr:FG00341.1	52.8	hypothetical protein	-	-	-	gi|531866831|gb|EQL03615.1|	90.67	Fungal specific transcription factor [Ophiocordyceps sinensis CO18]	sp|P41809|HKR1_YEAST	30.29	Signaling mucin HKR1 OS=Saccharomyces cerevisiae (strain ATCC 204508 / S288c) GN=HKR1 PE=1 SV=2	GO:0003677,GO:0005634,GO:0006351,GO:0008270	233	111	919	566	11.821	6.158	40.366	32.42	1.97649	0.000616554	0.0071527
MSTRG.8934	MSTRG.8934.1	4577	fgr:FG08716.1	51.74	hypothetical protein; K11699 RNA-dependent RNA polymerase 1 [EC:2.7.7.48]	SPAC6F12.09	35.56	[A] KOG0988 RNA-directed RNA polymerase QDE-1 required for posttranscriptional gene silencing and RNA interference	gi|531858156|gb|EQK98200.1|	97.12	suppressor of ascus dominance [Ophiocordyceps sinensis CO18]	sp|O14227|RDR1_SCHPO	35.56	RNA-dependent RNA polymerase 1 OS=Schizosaccharomyces pombe (strain 972 / ATCC 24843) GN=rdr1 PE=1 SV=1	GO:0001172,GO:0003968,GO:0006144,GO:0031379	2792	3181	10357	13609	78.897	99.343	247.522	423.834	1.9276	0.000558279	0.00657104
MSTRG.7278	MSTRG.7278.1	1270	fgr:FG05610.1	77.6	hypothetical protein; K00235 succinate dehydrogenase (ubiquinone) iron-sulfur protein [EC:1.3.5.1]	SPAC140.01	62.72	[C] KOG3049 Succinate dehydrogenase, Fe-S protein subunit	gi|630009131|ref|XP_007828551.1|	74.86	Succinate dehydrogenase [ubiquinone] iron-sulfur subunit [Pestalotiopsis fici W106-1]	sp|O42772|SDHB_MYCGR	67.4	Succinate dehydrogenase [ubiquinone] iron-sulfur subunit, mitochondrial OS=Mycosphaerella graminicola GN=SDH2 PE=3 SV=1	GO:0005743,GO:0006099,GO:0006118,GO:0006119,GO:0008177,GO:0009055,GO:0045281,GO:0046872,GO:0051537,GO:0051538,GO:0051539	759.06	668.82	2504.84	3081.38	108.286	102.541	315.887	502.982	1.89037	0.000400024	0.00510696
MSTRG.8076	MSTRG.8076.1	6629	ncr:NCU04548	82.87	DNA polymerase epsilon; K02324 DNA polymerase epsilon subunit 1 [EC:2.7.7.7]	YNL262w	60.07	[L] KOG1798 DNA polymerase epsilon, catalytic subunit A	gi|531859579|gb|EQK98651.1|	99.76	DNA polymerase epsilon [Ophiocordyceps sinensis CO18]	sp|O93845|DPOE_EMENI	71.58	DNA polymerase epsilon catalytic subunit A OS=Emericella nidulans (strain FGSC A4 / ATCC 38163 / CBS 112.46 / NRRL 194 / M139) GN=pol2 PE=3 SV=2	GO:0000166,GO:0003677,GO:0003887,GO:0006260,GO:0006281,GO:0008270,GO:0008622,GO:0071897	470	238	1258	1481	8.694	4.716	19.705	29.912	1.8822	0.000552362	0.00652334
MSTRG.2249	rna1763-EQL02526.1	13242	fgr:FG09607.1	86.12	DYHC_FUSSO Dynein heavy chain, cytosolic (DYHC); K10413 dynein heavy chain 1, cytosolic	7292540	49.03	[Z] KOG3595 Dyneins, heavy chain	gi|531865643|gb|EQL02526.1|	99.22	Dynein heavy chain, cytoplasmic [Ophiocordyceps sinensis CO18]	sp|P78716|DYHC_FUSSO	86.77	Dynein heavy chain, cytoplasmic OS=Fusarium solani subsp. pisi GN=DHC1 PE=3 SV=1	GO:0003777,GO:0005524,GO:0005874,GO:0006200,GO:0007018,GO:0016887,GO:0030286	1353	886	4539	3954	12.002	8.528	34.716	39.224	1.81856	0.000612897	0.00712603
MSTRG.5160	rna3830-EQL00462.1	931	fgr:FG00373.1	71.93	hypothetical protein; K02127 F-type H+-transporting ATPase subunit b [EC:3.6.3.14]	YPL078c	41.33	[C] KOG3976 Mitochondrial F1F0-ATP synthase, subunit b/ATP4	gi|531863072|gb|EQL00462.1|	88.99	ATP synthase subunit 4 [Ophiocordyceps sinensis CO18]	sp|Q7SE71|ATPF_NEUCR	68.7	ATP synthase subunit 4, mitochondrial OS=Neurospora crassa (strain ATCC 24698 / 74-OR23-1A / CBS 708.71 / DSM 1257 / FGSC 987) GN=atp-3 PE=3 SV=1	GO:0000276,GO:0015078,GO:0015986	1345	1187	567	281	289.124	278.777	103.787	66.857	1.74418	0.000620676	0.00718465
MSTRG.8874	rna6050-EQK98236.1	1836	fgr:FG04202.1	59.18	hypothetical protein; K01875 seryl-tRNA synthetase [EC:6.1.1.11]	At5g27470	39.55	[J] KOG2509 Seryl-tRNA synthetase	gi|322706038|gb|EFY97620.1|	70.27	putative serine-tRNA ligase, cytosolic [Metarhizium anisopliae ARSEF 23]	sp|Q39230|SYS_ARATH	39.55	Serine--tRNA ligase OS=Arabidopsis thaliana GN=At5g27470 PE=2 SV=1	GO:0004828,GO:0005524,GO:0005737,GO:0006434,GO:0006544,GO:0006563,GO:0006566	2952	2413	1229	507	286.877	255.336	102.432	54.859	1.80921	0.00088854	0.00944208
MSTRG.10830	rna6877-EQK97409.1	1480	fgr:FG05454.1	84.46	hypothetical protein; K00161 pyruvate dehydrogenase E1 component subunit alpha [EC:1.2.4.1]	YER178w	63.85	[C] KOG0225 Pyruvate dehydrogenase E1, alpha subunit	gi|531852566|gb|EQK97409.1|	93.59	pyruvate dehydrogenase E1 component alpha subunit [Ophiocordyceps sinensis CO18]	sp|P16387|ODPA_YEAST	63.85	Pyruvate dehydrogenase E1 component subunit alpha, mitochondrial OS=Saccharomyces cerevisiae (strain ATCC 204508 / S288c) GN=PDA1 PE=1 SV=2	GO:0004739,GO:0006094,GO:0006096,GO:0009097,GO:0009098,GO:0009099,GO:0043231,GO:0045254,GO:0055114	2937	2726	1231	585	319.811	323.325	114.882	70.892	1.81256	0.000672801	0.00764033
MSTRG.3810	MSTRG.3810.1	843	fgr:FG10885.1	90.16	SUCB_NEUCR Probable succinyl-CoA ligase [GDP-forming] beta-chain, mitochondrial precursor (Succinyl-CoA synthetase, beta chain) (SCS-beta); K01900 succinyl-CoA synthetase beta subunit [EC:6.2.1.4 6.2.1.5]	SPCC1620.08	68.03	[C] KOG2799 Succinyl-CoA synthetase, beta subunit	gi|632915042|gb|KDB14658.1|	93.44	putative succinyl-CoA ligase [Villosiclava virens]	sp|Q9P567|SUCB_NEUCR	86.89	Probable succinyl-CoA ligase [GDP-forming] subunit beta, mitochondrial OS=Neurospora crassa (strain ATCC 24698 / 74-OR23-1A / CBS 708.71 / DSM 1257 / FGSC 987) GN=B9J10.140 PE=3 SV=1	GO:0004774,GO:0005524,GO:0008152,GO:0042709,GO:0046872	1373.98	1085.47	542	241	268.496	231.62	90.297	52.173	1.8241	0.000524633	0.0062529
MSTRG.7955	MSTRG.7955.1	1443	fgr:FG01345.1	80.24	hypothetical protein; K11884 RNA-binding protein PNO1	YOR145c	66.81	[O] KOG3273 Predicted RNA-binding protein Pno1p interacting with Nob1p and involved in 26S proteasome assembly	gi|531859790|gb|EQK98716.1|	93.6	KH domain containing protein [Ophiocordyceps sinensis CO18]	sp|Q4IN63|PNO1_GIBZE	80.24	Pre-rRNA-processing protein PNO1 OS=Gibberella zeae (strain PH-1 / ATCC MYA-4620 / FGSC 9075 / NRRL 31084) GN=PNO1 PE=3 SV=1	GO:0003723,GO:0005730,GO:0005737,GO:0042254	1425	2053	542	479	178.783	271.967	57.474	69.752	1.89001	0.000221946	0.00324091
MSTRG.4515	rna3392-EQL00894.1	762	pan:PODANSg3902	81.06	hypothetical protein; K02138 F-type H+-transporting ATPase subunit d [EC:3.6.3.14]	YKL016c	49.02	[C] KOG3366 Mitochondrial F1F0-ATP synthase, subunit d/ATP7	gi|531863647|gb|EQL00894.1|	100	ATP synthase D chain [Ophiocordyceps sinensis CO18]	sp|Q7SI16|ATP7_NEUCR	78.03	ATP synthase subunit d, mitochondrial OS=Neurospora crassa (strain ATCC 24698 / 74-OR23-1A / CBS 708.71 / DSM 1257 / FGSC 987) GN=atp7 PE=3 SV=1	GO:0000274,GO:0006119,GO:0006200,GO:0006461,GO:0015986,GO:0046933,GO:0046961	946	747	383	138	340.123	294.667	116.246	54.514	1.8906	0.000818526	0.00887779
MSTRG.898	MSTRG.898.1	1654	fgr:FG07970.1	55.11	hypothetical protein; K00658 2-oxoglutarate dehydrogenase E2 component (dihydrolipoamide succinyltransferase) [EC:2.3.1.61]	SPBC776.15c	43.34	[C] KOG0559 Dihydrolipoamide succinyltransferase (2-oxoglutarate dehydrogenase, E2 subunit)	gi|531866756|gb|EQL03544.1|	90.27	Dihydrolipoamide succinyltransferase [Ophiocordyceps sinensis CO18]	sp|O94681|ODO2_SCHPO	43.34	Probable dihydrolipoyllysine-residue succinyltransferase component of 2-oxoglutarate dehydrogenase complex, mitochondrial OS=Schizosaccharomyces pombe (strain 972 / ATCC 24843) GN=kgd2 PE=3 SV=1	GO:0004149,GO:0006099,GO:0006554,GO:0042967,GO:0045252	1954	2183	726	475	198.157	239.822	62.669	53.135	1.92991	0.000150547	0.00235169
MSTRG.8830	MSTRG.8830.1	2138	fgr:FG01313.1	41.36	hypothetical protein	-	-	-	gi|531858363|gb|EQK98251.1|	78.44	bZIP-type transcription factor [Ophiocordyceps sinensis CO18]	-	-	-	GO:0003700,GO:0005667,GO:0006355,GO:0043565,GO:0045449	788	477	261	111	55.695	36.283	15.985	8.664	1.9354	0.000875647	0.00935366
MSTRG.7421	rna5288-EQK98997.1	900	fgr:FG07938.1	76.59	hypothetical protein; K03031 26S proteasome regulatory subunit N12	YFR052w	30.56	[O] KOG3151 26S proteasome regulatory complex, subunit RPN12/PSMD8	gi|531860479|gb|EQK98997.1|	91.3	26S proteasome non-ATPase regulatory subunit 8 [Ophiocordyceps sinensis CO18]	sp|P32496|RPN12_YEAST	30.56	26S proteasome regulatory subunit RPN12 OS=Saccharomyces cerevisiae (strain ATCC 204508 / S288c) GN=RPN12 PE=1 SV=3	GO:0005838,GO:0006508	843	904	337	175	155.649	182.206	53.085	35.817	1.93636	0.000273658	0.00379042
MSTRG.7467	MSTRG.7467.1	1520	mgr:MGG_01058	74.19	MG01058.4; hypothetical protein; K00939 adenylate kinase [EC:2.7.4.3]	YDR226w	65.44	[F] KOG3078 Adenylate kinase	gi|531860411|gb|EQK98972.1|	98.71	Adenylate kinase [Ophiocordyceps sinensis CO18]	sp|A4RD93|KAD2_MAGO7	74.19	Adenylate kinase OS=Magnaporthe oryzae (strain 70-15 / ATCC MYA-4617 / FGSC 8958) GN=ADK1 PE=3 SV=1	GO:0004017,GO:0005524,GO:0005743,GO:0005758,GO:0005829,GO:0006144,GO:0006172,GO:0006270,GO:0046033,GO:0046034,GO:0046939	1410.72	1171.83	515.73	231.85	178.241	163.933	61.769	39.684	1.96115	0.000171011	0.00262109
MSTRG.2946	MSTRG.2946.1	4212	fgr:FG06822.1	92.9	GYS_NEUCR Glycogen [starch] synthase; K00693 glycogen(starch) synthase [EC:2.4.1.11]	YFR015c	66.35	[G] KOG3742 Glycogen synthase	gi|531865066|gb|EQL02021.1|	99.81	glycogen synthase [Ophiocordyceps sinensis CO18]	sp|O93869|GYS_NEUCR	89.64	Glycogen [starch] synthase OS=Neurospora crassa (strain ATCC 24698 / 74-OR23-1A / CBS 708.71 / DSM 1257 / FGSC 987) GN=gsy-1 PE=2 SV=2	GO:0004373,GO:0005739,GO:0005978,GO:0005982,GO:0005985	1613	1198	529	268	66.975	53.064	18.592	13.346	1.97832	0.00013979	0.00223106
MSTRG.1166	MSTRG.1166.1	2067	ncr:NCU04414	85.53	hypothetical protein; K03065 26S proteasome regulatory subunit T5	YOR117w	70.07	[O] KOG0652 26S proteasome regulatory complex, ATPase RPT5	gi|531866515|gb|EQL03316.1|	89.51	26S protease regulatory subunit 6A [Ophiocordyceps sinensis CO18]	sp|P33297|PRS6A_YEAST	70.07	26S protease regulatory subunit 6A OS=Saccharomyces cerevisiae (strain ATCC 204508 / S288c) GN=RPT5 PE=1 SV=3	GO:0000502,GO:0005524,GO:0005737,GO:0006508,GO:0008233,GO:0030163	2013	1634	692	340	142.665	125.756	42.138	26.818	1.98631	0.000109078	0.00187433
MSTRG.3478	rna2663-EQL01624.1	2060	ncr:NCU07926	77.23	glutaminyl-tRNA synthetase; K01886 glutaminyl-tRNA synthetase [EC:6.1.1.18]	SPBC342.02	51.53	[J] KOG1148 Glutaminyl-tRNA synthetase	gi|531864587|gb|EQL01624.1|	98.34	glutaminyl-tRNA synthetase [Ophiocordyceps sinensis CO18]	sp|Q9Y7Y8|SYQ_SCHPO	51.53	Probable glutamine--tRNA ligase OS=Schizosaccharomyces pombe (strain 972 / ATCC 24843) GN=qrs1 PE=3 SV=1	GO:0004819,GO:0005524,GO:0005739,GO:0005829,GO:0006425	1341	808	474	147	89.521	58.683	27.192	10.943	1.98751	0.00068801	0.00778385
MSTRG.1176	rna974-EQL03323.1	1151	fgr:FG02778.1	64.76	hypothetical protein; K11419 histone-lysine N-methyltransferase SUV39H [EC:2.1.1.43]	SPBC428.08c_2	33.33	[BK] KOG1082 Histone H3 (Lys9) methyltransferase SUV39H1/Clr4, required for transcriptional silencing	gi|531866522|gb|EQL03323.1|	92.57	SET domain protein [Ophiocordyceps sinensis CO18]	sp|Q8X225|DIM5_NEUCR	54.05	Histone-lysine N-methyltransferase, H3 lysine-9 specific dim-5 OS=Neurospora crassa (strain ATCC 24698 / 74-OR23-1A / CBS 708.71 / DSM 1257 / FGSC 987) GN=dim-5 PE=1 SV=2	GO:0005634,GO:0005694,GO:0006554,GO:0008270,GO:0018024,GO:0034968	331	343	89	91	46.437	52.462	10.678	14.182	2.00461	0.000749849	0.00825227
MSTRG.7287	MSTRG.7287.2	2162	fgr:FG07528.1	89.43	KPYK_TRIRE Pyruvate kinase; K00873 pyruvate kinase [EC:2.7.1.40]	SPAC4H3.10c	63.16	[G] KOG2323 Pyruvate kinase	gi|531860648|gb|EQK99076.1|	100	Pyruvate kinase [Ophiocordyceps sinensis CO18]	sp|P31865|KPYK_HYPJE	89.18	Pyruvate kinase OS=Hypocrea jecorina GN=pki1 PE=3 SV=1	GO:0000287,GO:0004743,GO:0005524,GO:0006094,GO:0006096,GO:0006144,GO:0015976,GO:0016310,GO:0030955	6083	5089	1843	1219	443.046	405.548	112.804	98.692	2.00524	0.000151472	0.0023577
MSTRG.4525	MSTRG.4525.1	997	ncr:NCU00635	71.6	hypothetical protein; K03626 nascent polypeptide-associated complex subunit alpha	Hs14042953	62.5	[K] KOG2239 Transcription factor containing NAC and TS-N domains	gi|531863648|gb|EQL00895.1|	100	ATP synthase D chain [Ophiocordyceps sinensis CO18]	sp|Q2H4Z2|NACA_CHAGB	76.54	Nascent polypeptide-associated complex subunit alpha OS=Chaetomium globosum (strain ATCC 6205 / CBS 148.51 / DSM 1962 / NBRC 6347 / NRRL 1970) GN=EGD2 PE=3 SV=2	GO:0003231,GO:0003713,GO:0005634,GO:0005667,GO:0005737,GO:0010664,GO:0017025,GO:0030239,GO:0043403,GO:0045941,GO:0048633,GO:0048742,GO:0051451,GO:0061384,GO:1901227,GO:1901228,GO:2000138	4302	4353	1391	933	1109.6	1236.49	305.181	265.088	2.03791	0.000109555	0.00187944
MSTRG.9063	MSTRG.9063.1	1790	fgr:FG02608.1	72.65	hypothetical protein	YOR358w	65.83	[K] KOG1657 CCAAT-binding factor, subunit C (HAP5)	gi|399164759|emb|CCE34345.1|	82.43	probable CCAAT-binding transcription factor subunit aab-1 [Claviceps purpurea 20.1]	sp|Q02516|HAP5_YEAST	65.83	Transcriptional activator HAP5 OS=Saccharomyces cerevisiae (strain ATCC 204508 / S288c) GN=HAP5 PE=1 SV=1	GO:0003700,GO:0006355,GO:0016602,GO:0043565,GO:0045449,GO:0046982	844	945	252	220	71.784	87.491	18.397	20.85	2.03929	0.000102534	0.00178917
MSTRG.6402	MSTRG.6402.1	1773	fgr:FG01333.1	52.12	hypothetical protein; K01881 prolyl-tRNA synthetase [EC:6.1.1.15]	SPBC24C6.03	51	[J] KOG2324 Prolyl-tRNA synthetase	gi|531861664|gb|EQK99644.1|	91.47	prolyl-tRNA synthetase [Ophiocordyceps sinensis CO18]	sp|O74765|SYPM_SCHPO	51	Probable proline--tRNA ligase, mitochondrial OS=Schizosaccharomyces pombe (strain 972 / ATCC 24843) GN=SPBC24C6.03 PE=3 SV=1	GO:0004827,GO:0005524,GO:0005737,GO:0006433,GO:0006525,GO:0006560	571	513	202	94	49.982	48.888	15.178	9.584	2.04291	0.000384115	0.00495433
MSTRG.8609	MSTRG.8609.1	3920	fgr:FG00710.1	72.86	CGPB_FUSSO Cutinase gene palindrome-binding protein (PBP)	-	-	-	gi|531858749|gb|EQK98372.1|	99.77	white-collar 2 [Ophiocordyceps sinensis CO18]	sp|Q00858|CGPB_FUSSO	72.2	Cutinase gene palindrome-binding protein OS=Fusarium solani subsp. pisi PE=2 SV=1	GO:0003700,GO:0004871,GO:0005667,GO:0006355,GO:0007165,GO:0008270,GO:0043565,GO:0045449	3369	1874	1087	360	149.247	87.152	43.149	17.475	2.04821	0.000520021	0.00623253
MSTRG.4977	MSTRG.4977.1	4699	afv:AFLA_066440	66.42	hypothetical protein	CE13740	31.1	[F] KOG1712 Adenine phosphoribosyl transferases	gi|531863239|gb|EQL00581.1|	99	phosphoribosyl transferase domain protein [Ophiocordyceps sinensis CO18]	sp|A7NG77|APT_ROSCS	33.53	Adenine phosphoribosyltransferase OS=Roseiflexus castenholzii (strain DSM 13941 / HLO8) GN=apt PE=3 SV=1	GO:0006040,GO:0008762,GO:0009116,GO:0016740,GO:0050660,GO:0055114	445	294	135	64	14.26	9.808	3.999	2.404	2.0531	0.000746448	0.0082321
MSTRG.6778	MSTRG.6778.1	2426	fgr:FG06375.1	77.41	hypothetical protein; K00679 phospholipid:diacylglycerol acyltransferase [EC:2.3.1.158]	SPBC776.14	46.43	[I] KOG2369 Lecithin:cholesterol acyltransferase (LCAT)/Acyl-ceramide synthase	gi|531861271|gb|EQK99399.1|	100	Lecithin:cholesterol/phospholipid:diacylglycerol acyltransferase [Ophiocordyceps sinensis CO18]	sp|O94680|PDAT_SCHPO	47.93	Phospholipid:diacylglycerol acyltransferase OS=Schizosaccharomyces pombe (strain 972 / ATCC 24843) GN=plh1 PE=1 SV=2	GO:0008374,GO:0019432,GO:0019915,GO:0042967,GO:0046027	3609	2553	1087	550	215.737	164.723	56.333	37.228	2.07184	0.000119653	0.00201968
MSTRG.1758	rna1406-EQL02875.1	1034	fgr:FG00300.1	56.41	hypothetical protein; K02137 F-type H+-transporting ATPase oligomycin sensitivity conferral protein [EC:3.6.3.14]	SPCC1840.06	33.33	[C] KOG1662 Mitochondrial F1F0-ATP synthase, subunit OSCP/ATP5	gi|531866033|gb|EQL02875.1|	73.44	ATP synthase subunit 5 [Ophiocordyceps sinensis CO18]	sp|Q9P602|ATPO_NEUCR	54.17	ATP synthase subunit 5, mitochondrial OS=Neurospora crassa (strain ATCC 24698 / 74-OR23-1A / CBS 708.71 / DSM 1257 / FGSC 987) GN=atp-5 PE=3 SV=2	GO:0005739,GO:0006754,GO:0015078,GO:0015992,GO:0016020,GO:0019829,GO:0044769	1157	838	399	142	278.703	220.709	81.716	37.813	2.07211	0.000267411	0.00373344
MSTRG.2878	MSTRG.2878.2	846	fgr:FG09531.1	83.33	hypothetical protein	YHR147c	38.46	[J] KOG3254 Mitochondrial/chloroplast ribosomal protein L6	gi|531865124|gb|EQL02065.1|	100	Ribosomal protein L6 [Ophiocordyceps sinensis CO18]	sp|P32904|RM06_YEAST	38.46	54S ribosomal protein L6, mitochondrial OS=Saccharomyces cerevisiae (strain ATCC 204508 / S288c) GN=MRPL6 PE=1 SV=2	GO:0003735,GO:0005840,GO:0006412,GO:0019843,GO:0042254	1003	892	380	131	240.248	233.351	77.188	34.698	2.08745	0.000237646	0.00340854
MSTRG.8683	MSTRG.8683.1	2433	fgr:FG06342.1	86.85	hypothetical protein; K01027 3-oxoacid CoA-transferase [EC:2.8.3.5]	Hs4557817	56.36	[C] KOG3822 Succinyl-CoA:alpha-ketoacid-CoA transferase	gi|531858649|gb|EQK98333.1|	100	succinyl-CoA:3-ketoacid-coenzyme A transferase subunit A [Ophiocordyceps sinensis CO18]	sp|P55809|SCOT1_HUMAN	56.36	Succinyl-CoA:3-ketoacid coenzyme A transferase 1, mitochondrial OS=Homo sapiens GN=OXCT1 PE=1 SV=1	GO:0005739,GO:0006550,GO:0006552,GO:0006574,GO:0008260,GO:0046952	1461	2436	663	366	95.596	166.779	38.548	27.759	2.09216	0.000101127	0.0017725
MSTRG.1490	MSTRG.1490.1	2010	fgr:FG00781.1	80.38	hypothetical protein; K03030 26S proteasome regulatory subunit N11	SPAC31G5.13	68.85	[O] KOG1555 26S proteasome regulatory complex, subunit RPN11	gi|531866250|gb|EQL03074.1|	92.6	26S proteasome regulatory subunit [Ophiocordyceps sinensis CO18]	sp|P41878|RPN11_SCHPO	68.85	26S proteasome regulatory subunit rpn11 OS=Schizosaccharomyces pombe (strain 972 / ATCC 24843) GN=rpn11 PE=1 SV=2	GO:0000502	1947	1323	563	278	242.291	169.576	56.462	32.786	2.11934	5.03e-05	0.0010367
MSTRG.4331	MSTRG.4331.1	1930	fgr:FG01016.1	63.52	hypothetical protein; K02934 large subunit ribosomal protein L6e	YLR448w	46.32	[J] KOG1694 60s ribosomal protein L6	gi|531863818|gb|EQL01019.1|	83.94	Ribosomal protein L6E [Ophiocordyceps sinensis CO18]	sp|P05739|RL6B_YEAST	46.32	60S ribosomal protein L6-B OS=Saccharomyces cerevisiae (strain ATCC 204508 / S288c) GN=RPL6B PE=1 SV=4	GO:0003735,GO:0005840,GO:0006412,GO:0042254	13690	11018	4822	1597	1642.52	1412.36	429.322	189.734	2.14466	0.000278121	0.00383704
MSTRG.5131	rna3813-EQL00479.1	1469	scm:SCHCODRAFT_76066	82.35	hypothetical protein; K03064 26S proteasome regulatory subunit T4	YOR259c	82.12	[O] KOG0651 26S proteasome regulatory complex, ATPase RPT4	gi|302662898|ref|XP_003023099.1|	92.26	hypothetical protein TRV_02789 [Trichophyton verrucosum HKI 0517]	sp|P53549|PRS10_YEAST	82.12	26S protease subunit RPT4 OS=Saccharomyces cerevisiae (strain ATCC 204508 / S288c) GN=RPT4 PE=1 SV=4	GO:0000502,GO:0005524,GO:0005737,GO:0006508,GO:0008233,GO:0017111,GO:0030163	1185	998	470	104	139.007	127.549	47.222	13.566	2.15513	0.000542373	0.00643432
MSTRG.7721	MSTRG.7721.2	945	pan:PODANSg6204	86.96	hypothetical protein; K02151 V-type H+-transporting ATPase subunit F [EC:3.6.3.14]	YGR020c	73.91	[C] KOG3432 Vacuolar H+-ATPase V1 sector, subunit F	gi|672796584|gb|KFH47129.1|	90.2	V-type proton ATPase subunit F-like protein [Acremonium chrysogenum ATCC 11550]	sp|Q9Y756|VATF_NEUCR	57.65	V-type proton ATPase subunit F OS=Neurospora crassa (strain ATCC 24698 / 74-OR23-1A / CBS 708.71 / DSM 1257 / FGSC 987) GN=vma-7 PE=3 SV=1	GO:0006119,GO:0015991,GO:0033180,GO:0046961	710	658	198	136	203.182	206.549	42.518	35.639	2.16956	6.47e-05	0.00123896
MSTRG.5904	MSTRG.5904.1	1413	fgr:FG09853.1	90.13	hypothetical protein; K14568 essential for mitotic growth 1	YLR186w	72.37	[J] KOG3073 Protein required for 18S rRNA maturation and 40S ribosome biogenesis	gi|531862148|gb|EQK99949.1|	100	Ribosomal biogenesis, methyltransferase, EMG1/NEP1 [Ophiocordyceps sinensis CO18]	sp|Q9P8P7|NEP1_CANAX	75.5	Ribosomal RNA small subunit methyltransferase NEP1 OS=Candida albicans GN=NEP1 PE=3 SV=1	GO:0000447,GO:0000472,GO:0000480,GO:0003723,GO:0005730,GO:0005737,GO:0005880,GO:0008168,GO:0030686,GO:0032040,GO:0032259,GO:0042803	748	1104	380	101	99.875	167.62	43.437	13.158	2.1732	0.000452691	0.00560472
MSTRG.8843	MSTRG.8843.1	1416	fgr:FG02606.1	62.98	hypothetical protein	YDR041w	43.59	[J] KOG3321 Mitochondrial ribosomal protein S10	gi|531858350|gb|EQK98246.1|	91.7	Ribosomal protein S10 [Ophiocordyceps sinensis CO18]	sp|Q4IJK2|RT10_GIBZE	62.98	37S ribosomal protein S10, mitochondrial OS=Gibberella zeae (strain PH-1 / ATCC MYA-4620 / FGSC 9075 / NRRL 31084) GN=RSM10 PE=3 SV=1	GO:0003735,GO:0004812,GO:0005840,GO:0006418,GO:0042254	634	664	195	121	109.02	141.897	27.433	23.568	2.18608	7.05e-05	0.00132884
MSTRG.5516	MSTRG.5516.1	2354	ssl:SS1G_01191	79.13	adenosylhomocysteinase ; K01251 adenosylhomocysteinase [EC:3.3.1.1]	YER043c	69.29	[H] KOG1370 S-adenosylhomocysteine hydrolase	gi|531862532|gb|EQL00197.1|	92.55	adenosylhomocysteinase [Ophiocordyceps sinensis CO18]	sp|P83783|SAHH_CANAL	70.08	Adenosylhomocysteinase OS=Candida albicans (strain SC5314 / ATCC MYA-2876) GN=SAH1 PE=1 SV=2	GO:0004013,GO:0006555,GO:0006730	3384.43	4977.43	1758.61	409.85	199.524	308.664	89.601	25.031	2.18653	0.000674626	0.00764892
MSTRG.10096	rna6626-EQK97660.1	946	ncr:NCU07853	70.5	uricase; K00365 urate oxidase [EC:1.7.3.3]	SPCC1223.09	42.96	[Q] KOG1599 Uricase (urate oxidase)	gi|531855464|gb|EQK97660.1|	99.24	uricase [Ophiocordyceps sinensis CO18]	sp|P33282|URIC_EMENI	67.05	Uricase OS=Emericella nidulans (strain FGSC A4 / ATCC 38163 / CBS 112.46 / NRRL 194 / M139) GN=uaZ PE=3 SV=1	GO:0004846,GO:0005777,GO:0006144,GO:0019628,GO:0055114	510	691	156	130	84.689	125.191	22.127	23.954	2.19582	9.53e-05	0.00168997
MSTRG.9337	MSTRG.9337.1	2705	fgr:FG09850.1	61.42	hypothetical protein	Hs18582141	26.53	[S] KOG3758 Uncharacterized conserved protein	gi|531857320|gb|EQK97976.1|	100	golgi transport complex subunit Cog6 [Ophiocordyceps sinensis CO18]	sp|Q2HH52|COG6_CHAGB	55.95	Conserved oligomeric Golgi complex subunit 6 OS=Chaetomium globosum (strain ATCC 6205 / CBS 148.51 / DSM 1962 / NBRC 6347 / NRRL 1970) GN=COG6 PE=3 SV=1	GO:0006891,GO:0017119	806	557	199	127	45.873	34.778	9.611	7.661	2.19932	7.18e-05	0.0013513
MSTRG.11160	rna6952-EQK97334.1	306	fgr:FG00561.1	91.09	hypothetical protein; K00413 ubiquinol-cytochrome c reductase cytochrome c1 subunit [EC:1.10.2.2]	YOR065w	60.82	[C] KOG3052 Cytochrome c1	gi|531850505|gb|EQK97334.1|	100	Cytochrome c1 [Ophiocordyceps sinensis CO18]	sp|P07142|CY1_NEUCR	92.55	Cytochrome c1, heme protein, mitochondrial OS=Neurospora crassa (strain ATCC 24698 / 74-OR23-1A / CBS 708.71 / DSM 1257 / FGSC 987) GN=cyt-1 PE=2 SV=1	GO:0005506,GO:0005750,GO:0006118,GO:0020037,GO:0045153	574	513	195	74	648.835	650.764	177.867	88.46	2.2017	0.000229035	0.00332133
MSTRG.7601	rna5389-EQK98897.1	1275	fgr:FG02770.1	76.83	hypothetical protein; K01624 fructose-bisphosphate aldolase, class II [EC:4.1.2.13]	YKL060c	64.24	[G] KOG4153 Fructose 1,6-bisphosphate aldolase	gi|531860258|gb|EQK98897.1|	87.32	fructose-bisphosphate aldolase, class II [Ophiocordyceps sinensis CO18]	sp|Q9HGY9|ALF_ASPOR	73.16	Fructose-bisphosphate aldolase OS=Aspergillus oryzae (strain ATCC 42149 / RIB 40) GN=fbaA PE=2 SV=2	GO:0004332,GO:0005739,GO:0005829,GO:0006000,GO:0006013,GO:0006020,GO:0006094,GO:0006096,GO:0006098,GO:0008270,GO:0015976	3202	4994	1152	817	415.407	706.123	127.927	117.829	2.20299	5.69e-05	0.0011374
MSTRG.2548	MSTRG.2548.1	1748	fgr:FG04410.1	86.21	PSA2_NEUCR Probable proteasome subunit alpha type 2; K02726 20S proteasome subunit alpha 2 [EC:3.4.25.1]	YML092c	62.81	[O] KOG0181 20S proteasome, regulatory subunit alpha type PSMA2/PRE8	gi|531865407|gb|EQL02312.1|	100	proteasome subunit alpha type 2 [Ophiocordyceps sinensis CO18]	sp|Q8X077|PSA2_NEUCR	76.5	Probable proteasome subunit alpha type-2 OS=Neurospora crassa (strain ATCC 24698 / 74-OR23-1A / CBS 708.71 / DSM 1257 / FGSC 987) GN=pca-2 PE=3 SV=1	GO:0004298,GO:0005634,GO:0005737,GO:0006511,GO:0019773	1027	622	313	94	156.767	104.272	27.925	9.239	2.21646	0.000286912	0.0039325
MSTRG.10070	MSTRG.10070.1	1390	mgr:MGG_07727	76.5	MG07727.4; proteasome subunit alpha type 3; K02727 20S proteasome subunit alpha 7 [EC:3.4.25.1]	SPCC1795.04c	44.75	[O] KOG0184 20S proteasome, regulatory subunit alpha type PSMA3/PRE10	gi|531855550|gb|EQK97673.1|	97.87	proteasome subunit alpha 3 [Ophiocordyceps sinensis CO18]	sp|O59770|PSA7_SCHPO	44.75	Probable proteasome subunit alpha type-7 OS=Schizosaccharomyces pombe (strain 972 / ATCC 24843) GN=pre10 PE=1 SV=1	GO:0004298,GO:0005634,GO:0005737,GO:0006511,GO:0019773	1173	618	249	163	141.739	78.875	23.082	18.718	2.24737	5.37e-05	0.00109719
MSTRG.4092	rna3107-EQL01184.1	1047	fgr:FG00597.1	81.38	hypothetical protein; K03124 transcription initiation factor TFIIB	SPAC16E8.16	46.36	[K] KOG1597 Transcription initiation factor TFIIB	gi|531864041|gb|EQL01184.1|	100	transcription initiation protein [Ophiocordyceps sinensis CO18]	sp|O13749|TF2B_SCHPO	46.36	Transcription initiation factor IIB OS=Schizosaccharomyces pombe (strain 972 / ATCC 24843) GN=sua7 PE=3 SV=1	GO:0003743,GO:0005840,GO:0006352,GO:0006355,GO:0006446,GO:0008270,GO:0017025	712	741	203	133	96.318	109.276	23.5	19.993	2.25512	3.6e-05	0.00080998
MSTRG.3513	MSTRG.3513.1	3257	pan:PODANSg9148	76.01	hypothetical protein; K02932 large subunit ribosomal protein L5e	YPL131w	64.49	[J] KOG0875 60S ribosomal protein L5	gi|531864560|gb|EQL01602.1|	93.19	Ribosomal protein L5, eukaryotic/archaeal [Ophiocordyceps sinensis CO18]	sp|O59953|RL5_NEUCR	73.9	60S ribosomal protein L5 OS=Neurospora crassa (strain ATCC 24698 / 74-OR23-1A / CBS 708.71 / DSM 1257 / FGSC 987) GN=rpl-5 PE=3 SV=1	GO:0003735,GO:0005840,GO:0006412,GO:0008097,GO:0042254	10418.6	7437.88	2656.08	1489.83	944.982	655.291	175.325	134.666	2.25696	4.35e-05	0.00093687
MSTRG.11256	MSTRG.11256.1	1023	fgr:FG10739.1	85.19	hypothetical protein; K00228 coproporphyrinogen III oxidase [EC:1.3.3.3]	7297203	59.63	[H] KOG1518 Coproporphyrinogen III oxidase CPO/HEM13	gi|632912348|gb|KDB12145.1|	91.36	coproporphyrinogen III oxidase [Villosiclava virens]	sp|Q9V3D2|HEM6_DROME	59.63	Oxygen-dependent coproporphyrinogen-III oxidase OS=Drosophila melanogaster GN=Coprox PE=1 SV=1	GO:0004109,GO:0006779,GO:0015994,GO:0055114	551	475	177	66	125.651	116.763	30.885	15.249	2.2652	0.000190149	0.00284384
MSTRG.2287	MSTRG.2287.1	4399	fgr:FG07493.1	37.67	hypothetical protein	At5g10720	33.55	[T] KOG0519 Sensory transduction histidine kinase	gi|531865613|gb|EQL02499.1|	98.08	histidine kinase [Ophiocordyceps sinensis CO18]	sp|Q8D5Z6|LUXQ_VIBVU	31.07	Autoinducer 2 sensor kinase/phosphatase LuxQ OS=Vibrio vulnificus (strain CMCP6) GN=luxQ PE=3 SV=1	GO:0000155,GO:0000160,GO:0009365,GO:0016020,GO:0023014	1237	638	343	101	38.286	21.484	9.073	3.491	2.27449	0.000240241	0.00343636
MSTRG.9077	MSTRG.9077.1	3221	fgr:FG01199.1	74.36	hypothetical protein; K00820 glucosamine--fructose-6-phosphate aminotransferase (isomerizing) [EC:2.6.1.16]	YKL104c	63.42	[M] KOG1268 Glucosamine 6-phosphate synthetases, contain amidotransferase and phosphosugar isomerase domains	gi|531857835|gb|EQK98125.1|	82.33	glutamine:fructose-6-phosphate amidotransferase [Ophiocordyceps sinensis CO18]	sp|P14742|GFA1_YEAST	63.42	Glutamine--fructose-6-phosphate aminotransferase [isomerizing] OS=Saccharomyces cerevisiae (strain ATCC 204508 / S288c) GN=GFA1 PE=1 SV=4	GO:0004360,GO:0030246,GO:0034221	10159.5	27755.6	5439.55	2691.59	439.41	1305.34	207.638	131.917	2.41331	0.000181385	0.00273704
MSTRG.8132	rna5664-EQK98622.1	905	fgr:FG09722.1	81.25	hypothetical protein; K01823 isopentenyl-diphosphate delta-isomerase [EC:5.3.3.2]	SPBC106.15	64.91	[Q] KOG0142 Isopentenyl pyrophosphate:dimethylallyl pyrophosphate isomerase	gi|531859487|gb|EQK98622.1|	100	Isopentenyl-diphosphate delta-isomerase, type 1 [Ophiocordyceps sinensis CO18]	sp|Q10132|IDI1_SCHPO	64.91	Isopentenyl-diphosphate Delta-isomerase OS=Schizosaccharomyces pombe (strain 972 / ATCC 24843) GN=idi1 PE=2 SV=2	GO:0004452,GO:0006694,GO:0016114,GO:0016787	575	315	134	52	114.53	68.515	22.748	11.476	2.43106	0.000134001	0.0021711
MSTRG.287	rna232-EQL04078.1	1677	ncr:NCU03415	85.38	aldehyde dehydrogenase; K00128 aldehyde dehydrogenase (NAD+) [EC:1.2.1.3]	SPAC9E9.09c	65.89	[C] KOG2450 Aldehyde dehydrogenase	gi|531867314|gb|EQL04078.1|	98.68	aldehyde dehydrogenase [Ophiocordyceps sinensis CO18]	sp|P40108|ALDH_DAVTA	78.19	Aldehyde dehydrogenase OS=Davidiella tassiana GN=CLAH10 PE=1 SV=2	GO:0016620,GO:0030472,GO:0042729,GO:0055114,GO:0072686	2919	2319	833	271	257.917	223.054	63.161	26.672	2.44637	2.59e-05	0.000608562
MSTRG.7673	rna5429-EQK98851.1	1224	fgr:FG10256.1	52.78	hypothetical protein	Hs14150149	36.36	[S] KOG4829 Uncharacterized conserved protein	gi|531860164|gb|EQK98851.1|	100	proteasome subunit alpha type 6 [Ophiocordyceps sinensis CO18]	sp|Q5I0E3|CG050_RAT	39.06	Uncharacterized protein C7orf50 homolog OS=Rattus norvegicus PE=2 SV=1	GO:0000502	1633	3474	508	492	182.532	422.994	48.66	61.193	2.47352	2.22e-05	0.000534237
MSTRG.5875	MSTRG.5875.1	2715	fgr:FG08875.1	80.38	hypothetical protein; K00958 sulfate adenylyltransferase [EC:2.7.7.4]	YJR010w	53.25	[P] KOG0636 ATP sulfurylase (sulfate adenylyltransferase)	gi|531862171|gb|EQK99959.1|	92.83	Sulfate adenylyltransferase [Ophiocordyceps sinensis CO18]	sp|Q4I1N3|MET3_GIBZE	80.38	Sulfate adenylyltransferase OS=Gibberella zeae (strain PH-1 / ATCC MYA-4620 / FGSC 9075 / NRRL 31084) GN=MET3 PE=3 SV=2	GO:0000103,GO:0004020,GO:0004781,GO:0005524,GO:0005737,GO:0006144,GO:0009086,GO:0016310,GO:0019344,GO:0070814	3152	1643	564	376	208.59	118.92	32.072	26.745	2.47672	6.41e-06	0.000204041
MSTRG.2397	MSTRG.2397.1	1622	pan:PODANSg5730	74.58	hypothetical protein; K02941 large subunit ribosomal protein LP0	YLR340w	59.87	[J] KOG0815 60S acidic ribosomal protein P0	gi|531865521|gb|EQL02415.1|	89.3	60S acidic ribosomal protein P0 [Ophiocordyceps sinensis CO18]	sp|Q9C3Z6|RLA0_PODAS	74.58	60S acidic ribosomal protein P0 OS=Podospora anserina PE=3 SV=1	GO:0003735,GO:0005840,GO:0006414,GO:0042254	12129	9845	2591	1674	1405.4	1213.28	280.457	243.976	2.50471	4.79e-06	0.000161896
MSTRG.4196	rna3171-EQL01122.1	1731	fgr:FG05249.1	80.15	hypothetical protein; K01881 prolyl-tRNA synthetase [EC:6.1.1.15]	YHR020w	55.08	[J] KOG4163 Prolyl-tRNA synthetase	gi|531863955|gb|EQL01122.1|	96.32	prolyl-tRNA synthetase [Ophiocordyceps sinensis CO18]	sp|P38708|YHI0_YEAST	55.08	Putative proline--tRNA ligase YHR020W OS=Saccharomyces cerevisiae (strain ATCC 204508 / S288c) GN=YHR020W PE=1 SV=1	GO:0004827,GO:0005524,GO:0005840,GO:0006433,GO:0006525,GO:0006560,GO:0051276	526	342	134	37	40.86	28.909	8.934	3.209	2.54523	0.000136289	0.00219709
MSTRG.1062	MSTRG.1062.1	2346	fgr:FG04171.1	71.79	hypothetical protein; K00627 pyruvate dehydrogenase E2 component (dihydrolipoamide acetyltransferase) [EC:2.3.1.12]	YNL071w	45.22	[C] KOG0557 Dihydrolipoamide acetyltransferase	gi|531866611|gb|EQL03407.1|	100	dihydrolipoamide acetyltransferase component [Ophiocordyceps sinensis CO18]	sp|P20285|ODP2_NEUCR	70.66	Dihydrolipoyllysine-residue acetyltransferase component of pyruvate dehydrogenase complex, mitochondrial OS=Neurospora crassa (strain ATCC 24698 / 74-OR23-1A / CBS 708.71 / DSM 1257 / FGSC 987) GN=mrp-3 PE=1 SV=2	GO:0004742,GO:0005967,GO:0006086,GO:0006094,GO:0006096,GO:0042967	3654	3766	874	504	264.906	297.226	55.229	40.415	2.58476	1.5e-06	6e-05
MSTRG.2926	MSTRG.2926.1	1867	pan:PODANSg8334	82.19	hypothetical protein; K02984 small subunit ribosomal protein S3Ae	YML063w	61.47	[J] KOG1628 40S ribosomal protein S3A	gi|269969605|sp|B2B5P2.1|RS3A_PODAN	82.19	RecName: Full=40S ribosomal protein S1 [Podospora anserina S mat+]	sp|B2B5P2|RS3A_PODAN	82.19	40S ribosomal protein S1 OS=Podospora anserina (strain S / ATCC MYA-4624 / DSM 980 / FGSC 10383) GN=RPS1 PE=3 SV=1	GO:0003735,GO:0006412,GO:0022627,GO:0042254	12321.5	11988	2687.74	1676.98	1857.85	1969.2	283.806	241.876	2.62478	1.63e-06	6.39e-05
MSTRG.438	MSTRG.438.1	2415	pan:PODANSg4470	93.43	hypothetical protein; K03231 elongation factor 1-alpha	SPCC794.09c	85.71	[J] KOG0052 Translation elongation factor EF-1 alpha/Tu	gi|2494242|sp|Q01520.1|EF1A_PODAS	93.43	RecName: Full=Elongation factor 1-alpha; Short=EF-1-alpha [Podospora anserina]	sp|Q01520|EF1A_PODAS	93.43	Elongation factor 1-alpha OS=Podospora anserina GN=TEF PE=3 SV=1	GO:0003746,GO:0003924,GO:0005525,GO:0005840,GO:0006184,GO:0006448	59617.9	72145.1	15116.7	8658.49	4358.06	5738.35	949.1	705.634	2.63136	3.35e-06	0.000119279
MSTRG.318	MSTRG.318.1	3856	fgr:FG09483.1	76.55	hypothetical protein; K00058 D-3-phosphoglycerate dehydrogenase [EC:1.1.1.95]	At1g17740	42.64	[E] KOG0068 D-3-phosphoglycerate dehydrogenase, D-isomer-specific 2-hydroxy acid dehydrogenase superfamily	gi|531867287|gb|EQL04052.1|	100	d-3-phosphoglycerate dehydrogenase [Ophiocordyceps sinensis CO18]	sp|P73821|SERA_SYNY3	42.63	D-3-phosphoglycerate dehydrogenase OS=Synechocystis sp. (strain PCC 6803 / Kazusa) GN=serA PE=3 SV=1	GO:0004617,GO:0006544,GO:0006564,GO:0006566,GO:0016597,GO:0051287,GO:0055114	5278	2503	980	410	359.757	170.504	53.744	29.076	2.65261	9.51e-06	0.000277994
MSTRG.2576	MSTRG.2576.1	2978	fgr:FG09572.1	80.33	hypothetical protein; K00297 methylenetetrahydrofolate reductase (NADPH) [EC:1.5.1.20]	SPAC56F8.10	50	[E] KOG0564 5,10-methylenetetrahydrofolate reductase	gi|531865377|gb|EQL02286.1|	96.43	methylenetetrahydrofolate reductase 1 [Ophiocordyceps sinensis CO18]	sp|Q10258|MTHR1_SCHPO	50	Methylenetetrahydrofolate reductase 1 OS=Schizosaccharomyces pombe (strain 972 / ATCC 24843) GN=met9 PE=1 SV=1	GO:0004489,GO:0005739,GO:0006555,GO:0035999,GO:0055114	2088	1417	567	92	97.447	67.437	21.384	4.651	2.65269	0.000106479	0.00184173
MSTRG.2854	MSTRG.2854.1	1037	fgr:FG01552.1	87.14	hypothetical protein; K07095	SPAC15E1.06	45.71	[U] KOG3325 Membrane coat complex Retromer, subunit VPS29/PEP11	gi|531865135|gb|EQL02072.1|	99.28	retrograde transporter [Ophiocordyceps sinensis CO18]	sp|Q9UTI5|VPS29_SCHPO	45.71	Vacuolar protein sorting-associated protein 29 OS=Schizosaccharomyces pombe (strain 972 / ATCC 24843) GN=vps29 PE=3 SV=1	GO:0004647,GO:0006544,GO:0006563,GO:0006566,GO:0016311,GO:0030904,GO:0042147	279.52	249.9	77.38	18.58	52.218	49.966	11.884	4.233	2.67616	0.000171313	0.00262189
MSTRG.7650	MSTRG.7650.1	1888	act:ACLA_009490	72.43	tyrosyl-tRNA synthetase; K01866 tyrosyl-tRNA synthetase [EC:6.1.1.1]	YGR185c	55.14	[J] KOG2144 Tyrosyl-tRNA synthetase, cytoplasmic	gi|531860206|gb|EQK98870.1|	89.73	tyrosyl-tRNA synthetase, class Ib [Ophiocordyceps sinensis CO18]	sp|P36421|SYYC_YEAST	55.14	Tyrosine--tRNA ligase, cytoplasmic OS=Saccharomyces cerevisiae (strain ATCC 204508 / S288c) GN=TYS1 PE=1 SV=3	GO:0000162,GO:0004831,GO:0005524,GO:0005737,GO:0006437,GO:0006571,GO:0009094	435	423	140	19	43.355	46.53	11.699	1.85	2.68381	0.000440707	0.00546925
MSTRG.5003	MSTRG.5003.1	2019	fgr:FG05433.1	97.3	similar to 40S RIBOSOMAL PROTEIN S3; K02985 small subunit ribosomal protein S3e	SPBC16G5.14c	77.98	[J] KOG3181 40S ribosomal protein S3	gi|531863210|gb|EQL00562.1|	100	40s ribosomal protein [Ophiocordyceps sinensis CO18]	sp|O60128|RS3_SCHPO	77.98	40S ribosomal protein S3 OS=Schizosaccharomyces pombe (strain 972 / ATCC 24843) GN=rps3 PE=1 SV=1	GO:0003723,GO:0003735,GO:0006412,GO:0015935,GO:0042254	8304.29	7733.6	1526.49	1180.51	1116.8	1113.53	165.064	165.476	2.69152	7.7e-07	3.58e-05
MSTRG.2574	MSTRG.2574.1	3415	fgr:FG09574.1	91.89	EF2_NEUCR Elongation factor 2 (EF-2) (Colonial temperature-sensitive 3); K03234 elongation factor 2	SPCP31B10.07	74.87	[J] KOG0469 Elongation factor 2	gi|531865375|gb|EQL02284.1|	100	elongation factor 2 [Ophiocordyceps sinensis CO18]	sp|Q96X45|EF2_NEUCR	88.34	Elongation factor 2 OS=Neurospora crassa (strain ATCC 24698 / 74-OR23-1A / CBS 708.71 / DSM 1257 / FGSC 987) GN=cot-3 PE=3 SV=3	GO:0003746,GO:0003924,GO:0005525,GO:0005840,GO:0006184,GO:0045901	8965	11269	2580	1002	344.447	470.627	85.315	42.997	2.69518	5.19e-06	0.000171954
MSTRG.4753	MSTRG.4753.1	1306	scm:SCHCODRAFT_56595	45.95	hypothetical protein; K01866 tyrosyl-tRNA synthetase [EC:6.1.1.1]	YGR185c	39.55	[J] KOG2144 Tyrosyl-tRNA synthetase, cytoplasmic	gi|531863444|gb|EQL00732.1|	100	tyrosyl-tRNA synthetase [Ophiocordyceps sinensis CO18]	sp|Q5ZJ08|SYYC_CHICK	41.61	Tyrosine--tRNA ligase, cytoplasmic OS=Gallus gallus GN=YARS PE=2 SV=1	GO:0000162,GO:0004831,GO:0005524,GO:0005737,GO:0006437,GO:0006571,GO:0009094	588	518	121	64	69.797	67.575	12.265	8.183	2.7364	3.32e-06	0.000118581
MSTRG.5846	rna4305-EQK99981.1	495	fgr:FG10733.1	86.59	RS23_NEUCR 40S ribosomal protein S23; K02973 small subunit ribosomal protein S23e	YPR132w	77.44	[J] KOG1749 40S ribosomal protein S23	gi|531862213|gb|EQK99981.1|	88.41	Ribosomal protein S12/S23 [Ophiocordyceps sinensis CO18]	sp|Q9HE74|RS23_NEUCR	84.15	40S ribosomal protein S23 OS=Neurospora crassa (strain ATCC 24698 / 74-OR23-1A / CBS 708.71 / DSM 1257 / FGSC 987) GN=crp-28 PE=3 SV=1	GO:0003735,GO:0005739,GO:0006412,GO:0015935,GO:0042254	4586	4106	866	553	2244	2212.63	354.945	295.366	2.75754	3.21e-07	1.66e-05
MSTRG.4750	rna3549-EQL00745.1	1666	fgr:FG09266.1	77.48	hypothetical protein; K01641 hydroxymethylglutaryl-CoA synthase [EC:2.3.3.10]	SPAC4F8.14c	59.02	[I] KOG1393 Hydroxymethylglutaryl-CoA synthase	gi|531863460|gb|EQL00745.1|	95.13	hydroxymethylglutaryl-CoA synthase [Ophiocordyceps sinensis CO18]	sp|P54874|HMCS_SCHPO	59.02	Hydroxymethylglutaryl-CoA synthase OS=Schizosaccharomyces pombe (strain 972 / ATCC 24843) GN=hcs1 PE=1 SV=1	GO:0004421,GO:0006084,GO:0006550,GO:0006552,GO:0006574,GO:0006696,GO:0008299,GO:0046950	12467	16559	2340	2263	1220.94	1765.81	196.533	246.767	2.76752	1.02e-06	4.51e-05
MSTRG.6681	rna4824-EQK99464.1	564	afm:AFUA_3G05360	76.06	histone H2A; K11251 histone H2A	SPAC19G12.06c	97.85	[B] KOG1756 Histone 2A	gi|212545086|ref|XP_002152697.1|	74.82	histone H2A [Talaromyces marneffei ATCC 18224]	sp|Q4HTT1|H2A_GIBZE	98.95	Histone H2A OS=Gibberella zeae (strain PH-1 / ATCC MYA-4620 / FGSC 9075 / NRRL 31084) GN=HTA1 PE=3 SV=3	GO:0000786,GO:0003677,GO:0005634,GO:0006281,GO:0046982	12176.9	7884.96	2655.83	607	6942.82	4962.8	1262.34	376.249	2.84235	2.17e-05	0.00052531
MSTRG.1190	MSTRG.1190.1	2456	fgr:FG08642.1	54.04	hypothetical protein; K01164 ribonuclease P/MRP protein subunit POP1 [EC:3.1.26.5]	YNL221c	23.42	[A] KOG3322 Ribonucleases P/MRP protein subunit	gi|531866505|gb|EQL03307.1|	100	Ribonucleases P/MRP protein subunit [Ophiocordyceps sinensis CO18]	sp|P41812|POP1_YEAST	23.42	Ribonucleases P/MRP protein subunit POP1 OS=Saccharomyces cerevisiae (strain ATCC 204508 / S288c) GN=POP1 PE=1 SV=1	GO:0001682,GO:0004526,GO:0030677,GO:0051252,GO:0090502	7083	4397	1221	556	358.345	241.892	53.132	31.396	2.85782	8.01e-07	3.7e-05
MSTRG.5548	rna4103-EQL00181.1	1655	fgr:FG02504.1	69.41	hypothetical protein; K00026 malate dehydrogenase [EC:1.1.1.37]	CE09512	49.29	[C] KOG1494 NAD-dependent malate dehydrogenase	gi|531862512|gb|EQL00181.1|	82.17	malate dehydrogenase [Ophiocordyceps sinensis CO18]	sp|O02640|MDHM_CAEEL	49.29	Probable malate dehydrogenase, mitochondrial OS=Caenorhabditis elegans GN=mdh-2 PE=3 SV=1	GO:0006090,GO:0006108,GO:0019643,GO:0030060,GO:0044262,GO:0046487	1394	1675	368	116	153.109	200.391	34.642	14.182	2.87521	9.51e-07	4.23e-05
MSTRG.4626	MSTRG.4626.1	3633	fgr:FG00843.1	81.52	hypothetical protein; K03021 DNA-directed RNA polymerase III subunit RPC2 [EC:2.7.7.6]	SPAC4G9.08c	61.69	[K] KOG0215 RNA polymerase III, second largest subunit	gi|531863575|gb|EQL00839.1|	99.17	DNA-directed RNA polymerase III polypeptide [Ophiocordyceps sinensis CO18]	sp|Q10233|RPC2_SCHPO	61.69	DNA-directed RNA polymerase III subunit RPC2 OS=Schizosaccharomyces pombe (strain 972 / ATCC 24843) GN=rpc2 PE=2 SV=1	GO:0003677,GO:0003899,GO:0005730,GO:0006144,GO:0006206,GO:0006351,GO:0032549	1596	930	284	101	55.695	35.292	8.535	3.94	2.89736	9.36e-07	4.19e-05
MSTRG.9370	MSTRG.9370.1	623	fgr:FG05670.1	59.57	hypothetical protein; K10251 beta-keto reductase [EC:1.1.1.-]	YBR159w	38.17	[I] KOG1014 17 beta-hydroxysteroid dehydrogenase type 3, HSD17B3	gi|572275173|gb|ETR98623.1|	61.18	NAD(P)-binding protein [Trichoderma reesei RUT C-30]	sp|Q2H1V7|MKAR_CHAGB	51.61	Very-long-chain 3-oxoacyl-CoA reductase OS=Chaetomium globosum (strain ATCC 6205 / CBS 148.51 / DSM 1962 / NBRC 6347 / NRRL 1970) GN=CHGG_04239 PE=3 SV=1	GO:0005783,GO:0006633,GO:0016491,GO:0044425	700	342	130	21	220.975	118.306	34.735	7.295	3.01404	8.84e-05	0.00159968
MSTRG.5107	MSTRG.5107.1	3214	mgr:MGG_01096	51.72	MG01096.4; hypothetical protein; K01178 glucoamylase [EC:3.2.1.3]	-	-	-	gi|531863118|gb|EQL00498.1|	95.36	glucoamylase I precursor [Ophiocordyceps sinensis CO18]	sp|P69328|AMYG_ASPNG	46.07	Glucoamylase OS=Aspergillus niger GN=GLAA PE=1 SV=1	GO:0000272,GO:0004339,GO:0005982,GO:0005985,GO:0017177,GO:2001070	2188.46	928.52	350.2	73.39	121.688	55.309	15.725	4.337	3.09708	8.56e-06	0.000253902
MSTRG.7269	MSTRG.7269.3	1702	fgr:FG08335.1	66.51	hypothetical protein; K02873 large subunit ribosomal protein L13e	Hs15431295	42.6	[J] KOG3295 60S Ribosomal protein L13	gi|531860674|gb|EQK99089.1|	82.17	60S ribosomal protein L13 [Ophiocordyceps sinensis CO18]	sp|Q90YV5|RL13_ICTPU	45.74	60S ribosomal protein L13 OS=Ictalurus punctatus GN=rpl13 PE=2 SV=3	GO:0003735,GO:0005840,GO:0006412,GO:0042254	10677.2	8718.93	1813.55	724.91	1752.73	1449.41	242.846	120.18	3.11778	1.42e-07	8.33e-06
MSTRG.5601	rna4143-EQL00142.1	736	fgr:FG00395.1	98.85	RS15_PODAN 40S RIBOSOMAL PROTEIN S15 (S12); K02958 small subunit ribosomal protein S15e	7302912	71.26	[J] KOG0898 40S ribosomal protein S15	gi|587671140|gb|EWY93481.1|	73.33	40S ribosomal protein S15 [Fusarium oxysporum FOSC 3-a]	sp|P34737|RS15_PODAS	96.55	40S ribosomal protein S15 OS=Podospora anserina GN=RPS15 PE=3 SV=1	GO:0003723,GO:0003735,GO:0006412,GO:0015935,GO:0042254,GO:0043581	5109	4358	791	424	2293	2151.51	298.093	208.139	3.12022	2.34e-08	1.95e-06
MSTRG.3749	rna2869-EQL01424.1	882	ncr:NCU01528	83.28	glyceraldehyde 3-phosphate dehydrogenase; K00134 glyceraldehyde 3-phosphate dehydrogenase [EC:1.2.1.12]	Hs7669492	70.73	[G] KOG0657 Glyceraldehyde 3-phosphate dehydrogenase	gi|531864346|gb|EQL01424.1|	100	Glyceraldehyde/Erythrose phosphate dehydrogenase family [Ophiocordyceps sinensis CO18]	sp|Q00584|G3P_CLAP2	85.67	Glyceraldehyde-3-phosphate dehydrogenase OS=Claviceps purpurea (strain 20.1) GN=GPD-1 PE=3 SV=1	GO:0004365,GO:0005737,GO:0006094,GO:0006096,GO:0050661,GO:0051287,GO:0055114	3196	2534	492	238	537.783	465.234	70.694	44.429	3.13805	1.96e-08	1.72e-06
MSTRG.8620	rna5923-EQK98363.1	1554	fgr:FG01346.1	82.67	ENO_ALTAL Enolase (2-phosphoglycerate dehydratase) (2-phospho-D-glycerate hydro-lyase) (Major allergen Alt a 11) (Alt a XI); K01689 enolase [EC:4.2.1.11]	YGR254w	67.8	[G] KOG2670 Enolase	gi|531858726|gb|EQK98363.1|	93.67	Enolase [Ophiocordyceps sinensis CO18]	sp|Q7RV85|ENO_NEUCR	83	Enolase OS=Neurospora crassa (strain ATCC 24698 / 74-OR23-1A / CBS 708.71 / DSM 1257 / FGSC 987) GN=emp-7 PE=3 SV=1	GO:0000015,GO:0000162,GO:0000287,GO:0004634,GO:0006094,GO:0006096,GO:0006571,GO:0009094	5255	4065	974	241	538.257	453.42	85.529	27.477	3.15937	1e-06	4.44e-05
MSTRG.9331	rna6305-EQK97980.1	1080	ssl:SS1G_09262	97.59	hypothetical protein ; K02949 small subunit ribosomal protein S11e	SPAC31G5.03	90.36	[J] KOG1728 40S ribosomal protein S11	gi|573982795|ref|XP_006669318.1|	90.43	40S ribosomal protein S11 [Cordyceps militaris CM01]	sp|P79013|RS11_SCHPO	90.36	40S ribosomal protein S11 OS=Schizosaccharomyces pombe (strain 972 / ATCC 24843) GN=rps11a PE=2 SV=2	GO:0003735,GO:0005840,GO:0006412,GO:0042254	4757	4261	716	392	1077.52	1054.86	138.011	98.222	3.18221	9.9e-09	9.6e-07
MSTRG.16	MSTRG.16.1	643	cbr:CBG14053	69.07	Cbr-rpl-11.2; C. briggsae CBR-RPL-11.2 protein; K02868 large subunit ribosomal protein L11e	CE07033	69.07	[J] KOG0397 60S ribosomal protein L11	gi|672791666|gb|KFH42297.1|	94	60S ribosomal protein-like protein [Acremonium chrysogenum ATCC 11550]	sp|Q94300|RL11_CAEEL	70.1	60S ribosomal protein L11 OS=Caenorhabditis elegans GN=rpl-11.1 PE=3 SV=1	GO:0002119,GO:0003735,GO:0005840,GO:0006412,GO:0006915,GO:0007276,GO:0009792,GO:0030218,GO:0040035,GO:0040039,GO:0042254,GO:0042593	2848	2528	456	185	1023.51	996.801	138.317	72.982	3.25162	1.46e-08	1.32e-06
MSTRG.3201	rna2444-EQL01842.1	1531	bfu:BC1G_13792	80.2	acyl-CoA desaturase ; K00507 stearoyl-CoA desaturase (delta-9 desaturase) [EC:1.14.19.1]	SPCC1281.06c_1	61.42	[I] KOG1600 Fatty acid desaturase	gi|531864851|gb|EQL01842.1|	99.48	acyl-CoA desaturase [Ophiocordyceps sinensis CO18]	sp|Q12618|ACO1_AJECA	80.05	Acyl-CoA desaturase OS=Ajellomyces capsulatus GN=OLE1 PE=3 SV=1	GO:0004768,GO:0005506,GO:0005783,GO:0006633,GO:0016021,GO:0020037,GO:0055114	2349	4306	656	163	222.578	444.239	53.317	17.203	3.2617	1.35e-06	5.59e-05
MSTRG.7714	rna5449-EQK98835.1	692	mgr:MGG_10497	73.05	MG10497.4; hypothetical protein	-	-	-	gi|531860118|gb|EQK98835.1|	99.28	bli-3 [Ophiocordyceps sinensis CO18]	sp|Q01358|BLI3_NEUCR	63.23	Protein bli-3 OS=Neurospora crassa (strain ATCC 24698 / 74-OR23-1A / CBS 708.71 / DSM 1257 / FGSC 987) GN=bli-3 PE=2 SV=1	GO:0004733,GO:0008615,GO:0010181,GO:0042823,GO:0055114	2532	1142	250	159	698.603	344.859	58.522	48.4	3.29378	9.79e-09	9.6e-07
MSTRG.5512	rna4083-EQL00210.1	792	fgr:FG04476.1	87.95	hypothetical protein; K02974 small subunit ribosomal protein S24e	YIL069c	68.67	[J] KOG3424 40S ribosomal protein S24	gi|531862546|gb|EQL00210.1|	97.65	Ribosomal protein S24e [Ophiocordyceps sinensis CO18]	sp|P0CX32|RS24B_YEAST	68.67	40S ribosomal protein S24-B OS=Saccharomyces cerevisiae (strain ATCC 204508 / S288c) GN=RPS24B PE=1 SV=1	GO:0000166,GO:0003735,GO:0005840,GO:0006412,GO:0042254	3886	3110	446	307	2151.03	1899.43	206.005	184.895	3.34819	1.22e-09	1.55e-07
MSTRG.9292	MSTRG.9292.1	1283	mgr:MGG_06044	100	MG06044.4; ubiquitin fusion protein; K02927 large subunit ribosomal protein L40e	SPAC1805.12c	100	[J] KOG0003 Ubiquitin/60s ribosomal protein L40 fusion	gi|322712459|gb|EFZ04032.1|	100	ubiquitin [Metarhizium anisopliae ARSEF 23]	sp|P0CH07|RL402_SCHPO	100	Ubiquitin-60S ribosomal protein L40 OS=Schizosaccharomyces pombe (strain 972 / ATCC 24843) GN=ubi2 PE=1 SV=1	GO:0000027,GO:0000055,GO:0005634,GO:0005840,GO:0006412,GO:0016567	4730	3776	586	322	877.815	832.33	108.611	78.709	3.38182	1.8e-09	2.1e-07
MSTRG.9239	rna6253-EQK98033.1	942	fgr:FG05365.1	87.95	hypothetical protein; K02728 20S proteasome subunit alpha 3 [EC:3.4.25.1]	YGR135w	65.18	[O] KOG0178 20S proteasome, regulatory subunit alpha type PSMA4/PRE9	gi|531857543|gb|EQK98033.1|	89.29	proteasome component Y13 [Ophiocordyceps sinensis CO18]	sp|Q09682|PSA3_SCHPO	66.52	Probable proteasome subunit alpha type-3 OS=Schizosaccharomyces pombe (strain 972 / ATCC 24843) GN=SPAC13C5.01c PE=3 SV=1	GO:0004298,GO:0005634,GO:0005737,GO:0006511,GO:0019773	687	582	131	14	142.056	131.45	23.073	3.209	3.38698	2.32e-05	0.000553207
MSTRG.4522	rna3386-EQL00904.1	845	fgr:FG01160.1	81.36	hypothetical protein; K02732 20S proteasome subunit beta 6 [EC:3.4.25.1]	YBL041w	54.31	[O] KOG0179 20S proteasome, regulatory subunit beta type PSMB1/PRE7	gi|531863659|gb|EQL00904.1|	91.44	proteasome component C5 [Ophiocordyceps sinensis CO18]	sp|P23724|PSB6_YEAST	54.31	Proteasome subunit beta type-6 OS=Saccharomyces cerevisiae (strain ATCC 204508 / S288c) GN=PRE7 PE=1 SV=1	GO:0004298,GO:0005839,GO:0051603	920.3	629.25	124	38	178.614	133.343	20.522	8.173	3.45115	7.8e-08	4.99e-06
MSTRG.871	rna714-EQL03564.1	889	fgr:FG06924.1	79.65	hypothetical protein; K02865 large subunit ribosomal protein L10Ae	SPCC1183.08c	70.35	[J] KOG1570 60S ribosomal protein L10A	gi|531866777|gb|EQL03564.1|	87.79	ribosomal protein L1 [Ophiocordyceps sinensis CO18]	sp|Q7RZS0|RL10A_NEUCR	79.07	60S ribosomal protein L10a OS=Neurospora crassa (strain ATCC 24698 / 74-OR23-1A / CBS 708.71 / DSM 1257 / FGSC 987) GN=crp-74 PE=3 SV=1	GO:0003723,GO:0003735,GO:0006412,GO:0015934,GO:0042254	9064	7293	1117	548	2300.19	2024.33	240.814	153.614	3.46168	2.4e-09	2.62e-07
MSTRG.2028	MSTRG.2028.1	1417	fgr:FG06159.1	97.22	hypothetical protein; K02729 20S proteasome subunit alpha 5 [EC:3.4.25.1]	YGR253c	73.74	[O] KOG0176 20S proteasome, regulatory subunit alpha type PSMA5/PUP2	gi|531865824|gb|EQL02688.1|	100	proteasome component PUP2 [Ophiocordyceps sinensis CO18]	sp|P32379|PSA5_YEAST	73.74	Proteasome subunit alpha type-5 OS=Saccharomyces cerevisiae (strain ATCC 204508 / S288c) GN=PUP2 PE=1 SV=2	GO:0004298,GO:0005634,GO:0005737,GO:0006511,GO:0019773	889.91	532.64	136.11	16.5	92.694	60.451	12.144	1.913	3.47287	1.27e-05	0.000350218
MSTRG.6156	MSTRG.6156.1	2131	fgr:FG00634.1	72.68	hypothetical protein; K02991 small subunit ribosomal protein S6e	SPAPB1E7.12	61.03	[J] KOG1646 40S ribosomal protein S6	gi|584127203|gb|EWG36622.1|	72.48	40S ribosomal protein S6-B [Fusarium verticillioides 7600]	sp|Q6BXH8|RS6_DEBHA	65.64	40S ribosomal protein S6 OS=Debaryomyces hansenii (strain ATCC 36239 / CBS 767 / JCM 1990 / NBRC 0083 / IGC 2968) GN=RPS6 PE=3 SV=1	GO:0002376,GO:0005840,GO:0010467,GO:0044238,GO:0044260,GO:0044763,GO:0048731,GO:0050794	9725.38	8384.47	1240.27	550.83	1392.72	1239.16	139.022	68.279	3.51394	2.5e-09	2.7e-07
MSTRG.4917	MSTRG.4917.1	749	fgr:FG07186.1	89.36	hypothetical protein; K02930 large subunit ribosomal protein L4e	YDR012w	56.38	[A] KOG1475 Ribosomal protein RPL1/RPL2/RL4L4	gi|591476855|gb|EXM08007.1|	93.62	50S ribosomal protein L4e [Fusarium oxysporum f. sp. cubense tropical race 4 54006]	sp|P49626|RL4B_YEAST	56.38	60S ribosomal protein L4-B OS=Saccharomyces cerevisiae (strain ATCC 204508 / S288c) GN=RPL4B PE=1 SV=2	GO:0003735,GO:0005840,GO:0006412,GO:0042254,GO:0043227	3136	2633	460	122	656.772	602.378	82.059	28.292	3.52471	2.97e-08	2.32e-06
MSTRG.1119	MSTRG.1119.1	1564	fgr:FG07292.1	79.31	RS12_ERYGR 40S ribosomal protein S12; K02951 small subunit ribosomal protein S12e	SPBC1685.02c	59.42	[J] KOG3406 40S ribosomal protein S12	gi|531866581|gb|EQL03379.1|	87.65	Ribosomal protein S12e [Ophiocordyceps sinensis CO18]	sp|O59936|RS12_BLUGH	75.86	40S ribosomal protein S12 OS=Blumeria graminis f. sp. hordei GN=RPS12 PE=3 SV=1	GO:0003735,GO:0005840,GO:0006412,GO:0042254	7059.08	6364.67	917.48	379.82	1567.66	1285.1	156.315	91.094	3.55462	1.99e-09	2.3e-07
MSTRG.133	MSTRG.133.1	2361	pan:PODANSg6774	92.58	hypothetical protein; K01648 ATP citrate (pro-S)-lyase [EC:2.3.3.8]	SPBC1703.07	78.66	[C] KOG1254 ATP-citrate lyase	gi|531867410|gb|EQL04169.1|	99.8	ATP-citrate synthase subunit 1 [Ophiocordyceps sinensis CO18]	sp|Q8X097|ACL1_NEUCR	91.02	Probable ATP-citrate synthase subunit 1 OS=Neurospora crassa (strain ATCC 24698 / 74-OR23-1A / CBS 708.71 / DSM 1257 / FGSC 987) GN=B14D6.310 PE=3 SV=1	GO:0003878,GO:0004775,GO:0016829,GO:0019643,GO:0042709,GO:0044262,GO:0048037	1260	2735	325	75	75.781	180.839	16.848	4.902	3.56583	2.75e-07	1.46e-05
MSTRG.245	MSTRG.245.1	715	afv:AFLA_101160	78.82	40S ribosomal protein S9; K02997 small subunit ribosomal protein S9e	SPBC29A3.12	74.12	[J] KOG3301 Ribosomal protein S4	gi|399166426|emb|CCE32701.1|	73.85	probable 40S ribosomal protein S9 (S7) [Claviceps purpurea 20.1]	sp|O59675|RS9B_SCHPO	74.12	40S ribosomal protein S9-B OS=Schizosaccharomyces pombe (strain 972 / ATCC 24843) GN=rps9b PE=1 SV=3	GO:0003735,GO:0006412,GO:0015935,GO:0019843,GO:0042254	7533	5687	893	363	2313.51	1913.01	232.121	122.835	3.57632	2.3e-09	2.55e-07
MSTRG.1771	MSTRG.1771.1	916	fgr:FG06587.1	82.04	RS7_NEUCR 40S ribosomal protein S7; K02993 small subunit ribosomal protein S7e	Hs4506741	57.14	[J] KOG3320 40S ribosomal protein S7	gi|531866016|gb|EQL02859.1|	89.22	Ribosomal protein S7e [Ophiocordyceps sinensis CO18]	sp|O43105|RS7_NEUCR	77.84	40S ribosomal protein S7 OS=Neurospora crassa (strain ATCC 24698 / 74-OR23-1A / CBS 708.71 / DSM 1257 / FGSC 987) GN=crp-15 PE=3 SV=2	GO:0003735,GO:0005840,GO:0006412,GO:0042254	5432	4669	679	277	1481.45	1369.55	145.684	70.254	3.58427	1.42e-09	1.73e-07
MSTRG.9985	rna6579-EQK97705.1	555	fgr:FG05670.1	76.09	hypothetical protein; K10251 beta-keto reductase [EC:1.1.1.-]	YBR159w	50	[I] KOG1014 17 beta-hydroxysteroid dehydrogenase type 3, HSD17B3	gi|531855804|gb|EQK97705.1|	100	3-ketoacyl-CoA reductase [Ophiocordyceps sinensis CO18]	sp|Q2H1V7|MKAR_CHAGB	71.2	Very-long-chain 3-oxoacyl-CoA reductase OS=Chaetomium globosum (strain ATCC 6205 / CBS 148.51 / DSM 1962 / NBRC 6347 / NRRL 1970) GN=CHGG_04239 PE=3 SV=1	GO:0005789,GO:0016021,GO:0030497,GO:0045703,GO:0055114	655	384	84	16	213.275	137.043	23.138	5.738	3.59392	1.36e-06	5.59e-05
MSTRG.4521	MSTRG.4521.1	1039	mgr:MGG_04622	83.76	MG04622.4; hypothetical protein; K02732 20S proteasome subunit beta 6 [EC:3.4.25.1]	YBL041w	59.17	[O] KOG0179 20S proteasome, regulatory subunit beta type PSMB1/PRE7	gi|531863659|gb|EQL00904.1|	100	proteasome component C5 [Ophiocordyceps sinensis CO18]	sp|P23724|PSB6_YEAST	59.17	Proteasome subunit beta type-6 OS=Saccharomyces cerevisiae (strain ATCC 204508 / S288c) GN=PRE7 PE=1 SV=1	GO:0004298,GO:0005839,GO:0051603	194.7	141.75	17	11	28.655	22.751	2.143	1.798	3.70959	5.49e-07	2.66e-05
MSTRG.6171	rna4485-EQK99798.1	666	fgr:FG02541.1	79.13	RS14_NEUCR 40S ribosomal protein S14 (CRP2); K02955 small subunit ribosomal protein S14e	CE00821	74.78	[J] KOG0407 40S ribosomal protein S14	gi|531861894|gb|EQK99798.1|	80.87	Ribosomal protein S11 [Ophiocordyceps sinensis CO18]	sp|P19115|RS14_NEUCR	73.91	40S ribosomal protein S14 OS=Neurospora crassa (strain ATCC 24698 / 74-OR23-1A / CBS 708.71 / DSM 1257 / FGSC 987) GN=rps-14 PE=3 SV=2	GO:0003735,GO:0005840,GO:0006412,GO:0042254	5464	4215	524	287	2511.71	2132	202.127	144.218	3.73057	9e-11	1.82e-08
MSTRG.7584	MSTRG.7584.1	414	fgr:FG06270.1	97.22	hypothetical protein; K02947 small subunit ribosomal protein S10e	YMR230w	77.46	[J] KOG3344 40s ribosomal protein s10	gi|632919077|gb|KDB18472.1|	98.59	40s ribosomal protein S10b [Villosiclava virens]	sp|P46784|RS10B_YEAST	77.46	40S ribosomal protein S10-B OS=Saccharomyces cerevisiae (strain ATCC 204508 / S288c) GN=RPS10B PE=1 SV=1	GO:0005840	2240	1735	263	71	1627.56	1398	157.846	55.643	3.78303	1.18e-09	1.51e-07
MSTRG.2277	MSTRG.2277.2	3746	fgr:FG00524.1	82.51	hypothetical protein; K00963 UTP--glucose-1-phosphate uridylyltransferase [EC:2.7.7.9]	SPCC1322.04	62.19	[G] KOG2638 UDP-glucose pyrophosphorylase	gi|531865623|gb|EQL02508.1|	88.48	UTP-glucose-1-phosphate uridylyltransferase [Ophiocordyceps sinensis CO18]	sp|P78811|UGPA1_SCHPO	62.19	Probable UTP--glucose-1-phosphate uridylyltransferase OS=Schizosaccharomyces pombe (strain 972 / ATCC 24843) GN=fuy1 PE=1 SV=2	GO:0003983,GO:0005737,GO:0005978,GO:0005982,GO:0005985,GO:0005992,GO:0006011,GO:0006012,GO:0006078	5697	10474	1000	325	354.755	748.94	55.377	23.913	3.82932	8.97e-09	8.88e-07
MSTRG.3941	MSTRG.3941.1	1029	fgr:FG10941.1	83.91	similar to T46664 ubiquitin/S27a fusion protein [imported] - Neurospora crassa; K02977 small subunit ribosomal protein S27Ae	7297689	76.16	[J] KOG0004 Ubiquitin/40S ribosomal protein S27a fusion	gi|531864178|gb|EQL01284.1|	88.44	ubiquitin [Ophiocordyceps sinensis CO18]	sp|P14799|RS27A_NEUCR	83.14	Ubiquitin-40S ribosomal protein S27a OS=Neurospora crassa (strain ATCC 24698 / 74-OR23-1A / CBS 708.71 / DSM 1257 / FGSC 987) GN=ubi::crp-6 PE=1 SV=4	GO:0003735,GO:0005840,GO:0006412,GO:0042254	12004.9	10285.1	1264.75	484.49	2374.45	2221.46	213.232	106.154	3.8608	4.02e-10	6.39e-08
MSTRG.6998	MSTRG.6998.1	1522	fgr:FG05640.1	71.67	RS17_NEUCR 40S ribosomal protein S17 (CRP3); K02962 small subunit ribosomal protein S17e	YDR447c	64.34	[J] KOG0187 40S ribosomal protein S17	gi|531861007|gb|EQK99268.1|	73.33	Ribosomal protein S17e [Ophiocordyceps sinensis CO18]	sp|P27770|RS17_NEUCR	71.51	40S ribosomal protein S17 OS=Neurospora crassa (strain ATCC 24698 / 74-OR23-1A / CBS 708.71 / DSM 1257 / FGSC 987) GN=rps-17 PE=3 SV=1	GO:0000028,GO:0006414,GO:0022627	6965	5699	705	276	1326.99	1152.01	109.873	45.369	3.87568	1.94e-10	3.64e-08
MSTRG.7313	rna5231-EQK99054.1	822	fgr:FG07856.1	63.64	RL2A_ERYGR 60S ribosomal protein L27a (L29); K02900 large subunit ribosomal protein L27Ae	YGL103w	49.09	[J] KOG1742 60s ribosomal protein L15/L27	gi|531860612|gb|EQK99054.1|	73.64	60S ribosomal protein L27a (L29) [Ophiocordyceps sinensis CO18]	sp|P78987|RL27A_BLUGH	72.6	60S ribosomal protein L27a OS=Blumeria graminis f. sp. hordei PE=2 SV=1	GO:0030529	3390	2739	307	103	1577.43	1402.64	119.827	52.382	4.09764	4.02e-11	1e-08
MSTRG.4528	MSTRG.4528.1	772	fgr:FG08561.1	76.19	hypothetical protein; K02875 large subunit ribosomal protein L14e	YKL006w	46	[J] KOG3421 60S ribosomal protein L14	gi|531863649|gb|EQL00896.1|	99.05	ribosomal protein L14 [Ophiocordyceps sinensis CO18]	sp|P36105|RL14A_YEAST	46	60S ribosomal protein L14-A OS=Saccharomyces cerevisiae (strain ATCC 204508 / S288c) GN=RPL14A PE=1 SV=1	GO:0003735,GO:0005840,GO:0006412,GO:0042254	7639	5898	610	251	2057.8	1738.59	139.468	74.633	4.15426	1.29e-11	3.87e-09
MSTRG.7189	rna5142-EQK99143.1	771	cim:CIMG_03305	97.14	40S ribosomal protein S5-A; K02989 small subunit ribosomal protein S5e	SPAC328.10c	49.19	[J] KOG3291 Ribosomal protein S7	gi|119186515|ref|XP_001243864.1|	97.14	40S ribosomal protein S5 [Coccidioides immitis RS]	sp|Q7RVI1|RS5_NEUCR	53.12	40S ribosomal protein S5 OS=Neurospora crassa (strain ATCC 24698 / 74-OR23-1A / CBS 708.71 / DSM 1257 / FGSC 987) GN=rps-5 PE=3 SV=2	GO:0003723,GO:0003735,GO:0005576,GO:0006412,GO:0015935,GO:0016021,GO:0042254,GO:0055085	5052	4611	474	131	1317.28	1315.32	104.956	37.719	4.21207	1.38e-10	2.64e-08
MSTRG.4177	rna3158-EQL01127.1	1947	afv:AFLA_090550	53.61	hypothetical protein	-	-	-	gi|531863961|gb|EQL01127.1|	100	beta-lactamase domain-containing protein [Ophiocordyceps sinensis CO18]	sp|Q08347|BDS1_YEAST	42.59	Alkyl/aryl-sulfatase BDS1 OS=Saccharomyces cerevisiae (strain ATCC 204508 / S288c) GN=BDS1 PE=1 SV=1	GO:0008270,GO:0008800,GO:0017001,GO:0042318,GO:0046983	1472	2555	152	65	96.239	181.717	8.535	4.734	4.40486	7.85e-13	2.75e-10
MSTRG.8641	MSTRG.8641.1	2833	pan:PODANSg5532	85.71	hypothetical protein	-	-	-	gi|531858708|gb|EQK98354.1|	97.69	cyclopropane-fatty-acyl-phospholipid synthase [Ophiocordyceps sinensis CO18]	sp|P0A9H7|CFA_ECOLI	31.17	Cyclopropane-fatty-acyl-phospholipid synthase OS=Escherichia coli (strain K12) GN=cfa PE=1 SV=2	GO:0008610	5660.41	5650.5	401.69	79.48	404.579	441.806	24.056	7.034	4.79424	6.78e-11	1.48e-08
MSTRG.3745	MSTRG.3745.1	2192	pan:PODANSg6566	82.71	hypothetical protein; K02925 large subunit ribosomal protein L3e	SPAC17A5.03	64.31	[J] KOG0746 60S ribosomal protein L3 and related proteins	gi|531864343|gb|EQL01421.1|	88.18	60S ribosomal protein L3 [Ophiocordyceps sinensis CO18]	sp|P59671|RL3_NEUCR	79.54	60S ribosomal protein L3 OS=Neurospora crassa (strain ATCC 24698 / 74-OR23-1A / CBS 708.71 / DSM 1257 / FGSC 987) GN=rpl-3 PE=3 SV=1	GO:0003735,GO:0005840,GO:0006412,GO:0042254	13822.5	10344.7	677.13	186.83	1448.16	1178.4	57.362	19.011	5.01674	6.92e-13	2.6e-10
MSTRG.2107	rna1658-EQL02627.1	886	mgr:MGG_08622	40.44	MG08622.4; nucleoside diphosphate kinase; K00940 nucleoside-diphosphate kinase [EC:2.7.4.6]	YKL067w	65.08	[F] KOG0888 Nucleoside diphosphate kinase	gi|531865755|gb|EQL02627.1|	65.22	Nucleoside diphosphate kinase [Ophiocordyceps sinensis CO18]	sp|Q7Z8P9|NDK_ASPFU	71.43	Nucleoside diphosphate kinase OS=Neosartorya fumigata (strain ATCC MYA-4609 / Af293 / CBS 101355 / FGSC A1100) GN=ndk1 PE=3 SV=1	GO:0009201,GO:0009260,GO:0016740,GO:0042455	1507	938	35	3	517.325	353.111	10.15	1.129	6.23217	1.46e-13	8.07e-11
MSTRG.4719	rna3524-EQL00769.1	510	fgr:FG02012.1	66.67	hypothetical protein	-	-	-	gi|531863489|gb|EQL00769.1|	100	hypothetical protein OCS_03525 [Ophiocordyceps sinensis CO18]	-	-	-	GO:0005840	76.8	98.71	0	0	28.7	40.485	0	0	9.5337	7.16e-11	1.51e-08
MSTRG.763	MSTRG.763.1	539	mgr:MGG_03185	96.3	MG03185.4; ATP synthase beta chain, mitochondrial; K02133 F-type H+-transporting ATPase subunit beta [EC:3.6.3.14]	SPAC222.12c	77.78	[C] KOG1350 F0F1-type ATP synthase, beta subunit	gi|530474356|gb|EQB54598.1|	96.3	hypothetical protein CGLO_05538 [Colletotrichum gloeosporioides Cg-14]	sp|P23704|ATPB_NEUCR	93.83	ATP synthase subunit beta, mitochondrial OS=Neurospora crassa (strain ATCC 24698 / 74-OR23-1A / CBS 708.71 / DSM 1257 / FGSC 987) GN=atp-2 PE=2 SV=1	GO:0000275,GO:0001525,GO:0001649,GO:0005509,GO:0005524,GO:0005634,GO:0006119,GO:0006172,GO:0006200,GO:0006629,GO:0006898,GO:0006933,GO:0007165,GO:0009986,GO:0015986,GO:0015991,GO:0030228,GO:0042288,GO:0042612,GO:0042645,GO:0046933,GO:0046961,GO:0051453,GO:0070062	124.43	131.25	0	0	57.434	66.659	0	0	10.0636	7.18e-13	2.6e-10
MSTRG.4435	MSTRG.4435.1	2902	-	-	-	-	-	-	gi|531863717|gb|EQL00946.1|	99.75	Homeodomain-like protein [Ophiocordyceps sinensis CO18]	-	-	-	GO:0000785,GO:0003677,GO:0003682	948	2	0	0	48.357	0.138	0	0	11.9107	1.74e-06	6.83e-05

## Sheet: FB_vs_CM
Supplemental information 4-2. DEGs involved in enriched GO terms in FB vs.CM with log2FC | ≥2, FDR < 0.001.
Gene_ID	representative_transcript_id	representative_transcript_length	KEGG_accession	KEGG_identity	KEGG_description	KOG_accession	KOG_identity	KOG_description	NR_accession	NR_identity	NR_description	SwissProt_accession	SwissProt_identity	SwissProt_description	GO	count_FB-1	count_FB-2	count_DF-1	count_DF-2	count_CM-1	count_CM-2	TMM_FB-1	TMM_FB-2	TMM_DF-1	TMM_DF-2	TMM_CM-1	TMM_CM-2	FB_vs_CM_logFC	FB_vs_CM_logCPM	FB_vs_CM_PValue	FB_vs_CM_FDR
MSTRG.1997	rna1582-EQL02707.1	16579	afv:AFLA_008770	38.5	nonribosomal peptide synthase, putative	SPAC23G3.02c	23.04	[Q] KOG1178 Non-ribosomal peptide synthetase/alpha-aminoadipate reductase and related enzymes	gi|531865846|gb|EQL02707.1|	99.97	non-ribosomal peptide synthetase [Ophiocordyceps sinensis CO18]	sp|Q4WVN4|NRPS8_ASPFU	32.33	Nonribosomal peptide synthetase 8 OS=Neosartorya fumigata (strain ATCC MYA-4609 / Af293 / CBS 101355 / FGSC A1100) GN=NRPS8 PE=3 SV=1	GO:0003824,GO:0008152,GO:0031177	1548	0	0	0	0	0	10.805	0	0	0	0	0	-12.8074	5.32642	4.07877e-06	5.14186e-05
MSTRG.9491	MSTRG.9491.1	2722	fgr:FG08466.1	61.94	hypothetical protein	At1g63440	29.72	[P] KOG0207 Cation transport ATPase	gi|594723012|gb|EXV05898.1|	67.16	copper-(or silver)-translocating P-type ATPase [Metarhizium robertsii]	sp|Q8CN02|COPA_STAES	29.72	Copper-exporting P-type ATPase A OS=Staphylococcus epidermidis (strain ATCC 12228) GN=copA PE=3 SV=1	GO:0005524,GO:0008152,GO:0016021,GO:0019829,GO:0030001,GO:0046872,GO:0098655	616.18	271.27	562.73	433.05	0	0	30.586	14.649	24.029	23.996	0	0	-12.0417	4.56157	4.93702e-24	2.43642e-21
MSTRG.3655	rna2797-EQL01482.1	2697	fgr:FG02314.1	54.36	hypothetical protein	At1g09010	24.35	[G] KOG2230 Predicted beta-mannosidase	gi|531864415|gb|EQL01482.1|	100	exo-beta-D-glucosaminidase [Ophiocordyceps sinensis CO18]	sp|C0LRA7|EBDG_HYPVI	58.17	Exo-beta-D-glucosaminidase OS=Hypocrea virens GN=gls1 PE=2 SV=1	GO:0000272,GO:0005576,GO:0052761	712.15	160.79	456.02	7.37	0	0	32.539	7.989	17.933	0.376	0	0	-12.0042	4.52457	1.28424e-18	2.08104e-16
MSTRG.1995	MSTRG.1995.1	4974	cim:CIMG_09753	37.65	similar to multidrug resistance protein MDR	Hs4826838	27.85	[Q] KOG0054 Multidrug resistance-associated protein/mitoxantrone resistance protein, ABC superfamily	gi|531865844|gb|EQL02705.1|	97.67	ABC transporter [Ophiocordyceps sinensis CO18]	sp|O88563|MRP3_RAT	27.05	Canalicular multispecific organic anion transporter 2 OS=Rattus norvegicus GN=Abcc3 PE=2 SV=1	GO:0005524,GO:0006200,GO:0016021,GO:0042626,GO:0055085	185	0	0	0	0	0	4.686	0	0	0	0	0	-9.74476	2.28967	9.99263e-05	0.00078559
MSTRG.9490	MSTRG.9490.1	3691	fgr:FG08466.1	61.94	hypothetical protein	At1g63440	29.72	[P] KOG0207 Cation transport ATPase	gi|594723012|gb|EXV05898.1|	67.16	copper-(or silver)-translocating P-type ATPase [Metarhizium robertsii]	sp|Q8CN02|COPA_STAES	29.72	Copper-exporting P-type ATPase A OS=Staphylococcus epidermidis (strain ATCC 12228) GN=copA PE=3 SV=1	GO:0005524,GO:0008152,GO:0016021,GO:0019829,GO:0030001,GO:0046872,GO:0098655	108.56	18.32	0	0	0	0	3.545	0.652	0	0	0	0	-9.22132	1.77644	7.64104e-08	1.63305e-06
MSTRG.9538	rna6406-EQK97880.1	1217	pcs:Pc22g20780	42.98	Pc22g20780	-	-	-	gi|531856863|gb|EQK97880.1|	100	Protein kinase-like domain protein [Ophiocordyceps sinensis CO18]	-	-	-	GO:0016301,GO:0016310	19	29	54	6	0	0	2.247	3.737	5.474	0.794	0	0	-7.8729	0.492545	1.12986e-06	1.75492e-05
MSTRG.4177	rna3158-EQL01127.1	1947	afv:AFLA_090550	53.61	hypothetical protein	-	-	-	gi|531863961|gb|EQL01127.1|	100	beta-lactamase domain-containing protein [Ophiocordyceps sinensis CO18]	sp|Q08347|BDS1_YEAST	42.59	Alkyl/aryl-sulfatase BDS1 OS=Saccharomyces cerevisiae (strain ATCC 204508 / S288c) GN=BDS1 PE=1 SV=1	GO:0008270,GO:0008800,GO:0017001,GO:0042318,GO:0046983	1472	2555	152	65	50	28	96.239	181.717	8.535	4.734	2.282	1.29	-6.20122	6.79882	1.8007e-26	1.15001e-23
MSTRG.4516	MSTRG.4516.1	2937	ncr:NCU02741	73.3	DNA repair protein RAD51; K04482 DNA repair protein RAD51	SPAC644.14c	83.97	[L] KOG1433 DNA repair protein RAD51/RHP55	gi|531863656|gb|EQL00901.1|	78.33	DNA repair protein RAD51 [Ophiocordyceps sinensis CO18]	sp|P36601|RAD51_SCHPO	83.97	DNA repair protein rhp51 OS=Schizosaccharomyces pombe (strain 972 / ATCC 24843) GN=rhp51 PE=1 SV=1	GO:0003684,GO:0005524,GO:0006200,GO:0006281,GO:0008094	230251	185087	318178	75762.3	6243.76	6993.72	44669.6	38590.9	55123	16890.6	718.598	815.604	-5.46252	13.4772	6.34746e-24	2.87143e-21
MSTRG.4540	MSTRG.4540.1	609	mgr:MGG_03094	52.81	MG03094.4; hypothetical protein; K01803 triosephosphate isomerase (TIM) [EC:5.3.1.1]	-	-	-	gi|125601826|gb|ABN45967.1|	65.88	mitochondrial triosephosphate isomerase [Epichloe typhina]	sp|P0CL22|TPIS_COCIM	35.51	Putative triosephosphate isomerase OS=Coccidioides immitis (strain RS) GN=CIMG_07933 PE=1 SV=1	GO:0004807,GO:0006000,GO:0006013,GO:0006020,GO:0006094,GO:0006096,GO:0015976,GO:0046486	37.24	31.16	51.59	41.32	2.1	0	10.5	9.619	12.339	12.855	0.415	0	-5.39022	0.975311	2.90744e-07	5.32312e-06
MSTRG.10780	MSTRG.10780.1	1875	pan:PODANSg5281	81.16	hypothetical protein	SPBC16D10.08c	60.93	[O] KOG1051 Chaperone HSP104 and related ATP-dependent Clp proteases	gi|632918532|gb|KDB17961.1|	88.85	heat shock protein 101 [Villosiclava virens]	sp|P31540|HSP98_NEUCR	78.54	Heat shock protein hsp98 OS=Neurospora crassa (strain ATCC 24698 / 74-OR23-1A / CBS 708.71 / DSM 1257 / FGSC 987) GN=hsp98 PE=1 SV=2	GO:0005524,GO:0019538	20457.5	9792.5	15533	4244	693	343	1395.13	726.54	910.088	322.748	32.95	16.437	-5.34829	9.68603	6.80618e-18	9.85263e-16
MSTRG.10779	MSTRG.10779.1	1875	pan:PODANSg5281	81.16	hypothetical protein	SPBC16D10.08c	60.93	[O] KOG1051 Chaperone HSP104 and related ATP-dependent Clp proteases	gi|632918532|gb|KDB17961.1|	88.85	heat shock protein 101 [Villosiclava virens]	sp|P31540|HSP98_NEUCR	78.54	Heat shock protein hsp98 OS=Neurospora crassa (strain ATCC 24698 / 74-OR23-1A / CBS 708.71 / DSM 1257 / FGSC 987) GN=hsp98 PE=1 SV=2	GO:0005524,GO:0019538	20457.5	9792.5	15533	4244	693	343	1395.13	726.54	910.088	322.748	32.95	16.437	-5.34829	9.68603	6.70433e-18	9.85263e-16
MSTRG.6071	rna4427-EQK99857.1	1262	pan:PODANSg432	64.56	hypothetical protein	-	-	-	gi|531861995|gb|EQK99857.1|	93.29	alpha-ketoglutarate-dependent taurine dioxygenase [Ophiocordyceps sinensis CO18]	sp|Q12358|JLP1_YEAST	46.15	Alpha-ketoglutarate-dependent sulfonate dioxygenase OS=Saccharomyces cerevisiae (strain ATCC 204508 / S288c) GN=JLP1 PE=1 SV=1	GO:0051213,GO:0055114	1350	31	14	18	29	33	167.143	4.176	1.484	2.477	2.498	2.87	-4.91057	5.21196	3.15008e-05	0.000297137
MSTRG.3256	rna2486-EQL01810.1	1921	ncr:NCU06720	52.51	carboxypeptidase cpdS precursor; K01288 carboxypeptidase D [EC:3.4.16.6]	YMR297w	33.07	[OE] KOG1282 Serine carboxypeptidases (lysosomal cathepsin A)	gi|629691461|ref|XP_007811022.1|	58.05	serine-type carboxypeptidase [Metarhizium acridum CQMa 102]	sp|P52718|PEPF_ASPNG	38.33	Serine-type carboxypeptidase F OS=Aspergillus niger GN=pepF PE=1 SV=3	GO:0004185,GO:0006508	573	251	25	1	21	19	48.165	22.964	1.8	0.094	1.228	1.123	-4.83	4.50535	1.98157e-13	1.37032e-11
MSTRG.6910	MSTRG.6910.1	5576	fgr:FG02668.1	76.23	hypothetical protein	CE05227	47.8	[C] KOG1255 Succinyl-CoA synthetase, alpha subunit	gi|531861138|gb|EQK99321.1|	100	linoleate diol synthase [Ophiocordyceps sinensis CO18]	sp|Q4WY82|PPOC_ASPFU	45.65	Linoleate 10R-lipoxygenase OS=Neosartorya fumigata (strain ATCC MYA-4609 / Af293 / CBS 101355 / FGSC A1100) GN=ppoC PE=1 SV=2	GO:0004601,GO:0005506,GO:0006804,GO:0006979,GO:0016705,GO:0020037,GO:0055114	57026.1	276634	55741.5	17655.6	2921.65	15458.8	2077.96	11244.4	1687.94	675.084	73.859	392.037	-4.71102	13.228	2.49212e-07	4.64099e-06
MSTRG.1190	MSTRG.1190.1	2456	fgr:FG08642.1	54.04	hypothetical protein; K01164 ribonuclease P/MRP protein subunit POP1 [EC:3.1.26.5]	YNL221c	23.42	[A] KOG3322 Ribonucleases P/MRP protein subunit	gi|531866505|gb|EQL03307.1|	100	Ribonucleases P/MRP protein subunit [Ophiocordyceps sinensis CO18]	sp|P41812|POP1_YEAST	23.42	Ribonucleases P/MRP protein subunit POP1 OS=Saccharomyces cerevisiae (strain ATCC 204508 / S288c) GN=POP1 PE=1 SV=1	GO:0001682,GO:0004526,GO:0030677,GO:0051252,GO:0090502	7083	4397	1221	556	354	266	358.345	241.892	53.132	31.396	12.491	9.451	-4.69582	8.31517	3.38577e-19	6.12656e-17
MSTRG.3933	rna2989-EQL01298.1	687	fgr:FG07334.1	69.13	hypothetical protein	YBR101c	40.8	[O] KOG2160 Armadillo/beta-catenin-like repeat-containing protein	gi|531864194|gb|EQL01298.1|	100	Nucleotide exchange factor Fes1 [Ophiocordyceps sinensis CO18]	sp|Q4I624|FES1_GIBZE	69.13	Hsp70 nucleotide exchange factor FES1 OS=Gibberella zeae (strain PH-1 / ATCC MYA-4620 / FGSC 9075 / NRRL 31084) GN=FES1 PE=3 SV=1	GO:0005737,GO:0006417	3242.55	2560.51	1542.72	1000.2	166.74	156.43	766.492	661.7	310.135	261.399	27.431	26.002	-4.65771	7.33985	2.6735e-21	7.07956e-19
MSTRG.7820	rna5517-EQK98770.1	1209	zma:100382687	52.52	hypothetical protein LOC100382687	-	-	-	gi|531859953|gb|EQK98770.1|	100	Glycoside hydrolase [Ophiocordyceps sinensis CO18]	sp|Q09788|ASL1_SCHPO	30.15	Alkali-sensitive linkage protein 1 OS=Schizosaccharomyces pombe (strain 972 / ATCC 24843) GN=asl1 PE=1 SV=1	GO:0005975,GO:0016787	41537.9	66205.3	7603.92	8159.62	4984.07	1294.99	4712.39	8181.99	739.105	1029.89	394.037	103.261	-4.61916	11.5757	4.10799e-11	1.87397e-09
MSTRG.4722	MSTRG.4722.2	3081	cdu:CD36_71850	72.34	ATP-dependent molecular chaperone, HSP90 family, putative; K04079 molecular chaperone HtpG	YMR186w	76.59	[O] KOG0019 Molecular chaperone (HSP90 family)	gi|531863491|gb|EQL00771.1|	100	heat shock protein 90 [Ophiocordyceps sinensis CO18]	sp|O43109|HSP90_PODAS	88.64	Heat shock protein 90 homolog OS=Podospora anserina GN=MOD-E PE=3 SV=1	GO:0005524,GO:0006457,GO:0006950,GO:0051082	187969	167868	122961	42120.8	11087.8	9754.67	10036.6	9738.31	5563.22	2482.99	405.134	353.389	-4.58906	13.2836	6.62623e-19	1.12408e-16
MSTRG.613	MSTRG.613.1	3481	fgr:FG10791.1	88.44	hypothetical protein; K12614 ATP-dependent RNA helicase DDX6/DHH1 [EC:3.6.4.13]	SPBC776.09	80.35	[A] KOG0326 ATP-dependent RNA helicase	gi|672376646|gb|KFG78933.1|	90.83	ATP-dependent RNA helicase DHH1 [Metarhizium anisopliae]	sp|Q4HW67|DHH1_GIBZE	88.44	ATP-dependent RNA helicase DHH1 OS=Gibberella zeae (strain PH-1 / ATCC MYA-4620 / FGSC 9075 / NRRL 31084) GN=DHH1 PE=3 SV=1	GO:0003676,GO:0005524,GO:0006200,GO:0008026	975	1146.85	532.92	352.75	78.09	48.37	33.894	43.332	15.948	13.702	1.892	1.185	-4.57589	5.90413	1.06251e-18	1.77472e-16
MSTRG.1640	rna1324-EQL02964.1	1113	nfi:NFIA_044260	73.4	aspartate aminotransferase, putative	At5g53970	29.52	[E] KOG0259 Tyrosine aminotransferase	gi|531866128|gb|EQL02964.1|	100	Pyridoxal phosphate-dependent transferase, major domain protein [Ophiocordyceps sinensis CO18]	sp|Q84CG1|CAMYS_STRVI	27.89	Capreomycidine synthase OS=Streptomyces vinaceus GN=vioD PE=1 SV=1	GO:0008483,GO:0009058,GO:0030170	13	105	1	8	2	5	1.626	14.348	0.111	1.118	0.174	0.439	-4.55775	1.80299	0.000127545	0.000972441
MSTRG.6117	MSTRG.6117.1	2818	bfu:BC1G_13520	36.13	hypothetical protein	YLR121c	29.3	[O] KOG1339 Aspartyl protease	gi|531861949|gb|EQK99830.1|	87.67	aspartic protease [Ophiocordyceps sinensis CO18]	sp|C5FRQ0|OPSB_ARTOC	29.61	Probable aspartic-type endopeptidase OPSB OS=Arthroderma otae (strain ATCC MYA-4605 / CBS 113480) GN=OPSB PE=3 SV=1	GO:0004190,GO:0006508	159	384	1032	801	14	20	6.932	18.198	38.696	38.973	0.423	0.614	-4.50602	3.96404	4.37478e-10	1.69028e-08
MSTRG.891	rna731-EQL03540.1	1561	ncr:NCU00582	61.26	hypothetical protein; K01669 deoxyribodipyrimidine photo-lyase [EC:4.1.99.3]	At5g24850	42.91	[LT] KOG0133 Deoxyribodipyrimidine photolyase/cryptochrome	gi|531866752|gb|EQL03540.1|	100	Cryptochrome, DASH [Ophiocordyceps sinensis CO18]	sp|Q7SI68|CRYD_NEUCR	61.26	Putative cryptochrome DASH, mitochondrial OS=Neurospora crassa (strain ATCC 24698 / 74-OR23-1A / CBS 708.71 / DSM 1257 / FGSC 987) GN=cry PE=3 SV=1	GO:0003913,GO:0006281	1466	1295	5841	1461	81	94	128.631	123.699	439.806	142.818	4.955	5.801	-4.47121	6.27954	7.28389e-22	2.08109e-19
MSTRG.4750	rna3549-EQL00745.1	1666	fgr:FG09266.1	77.48	hypothetical protein; K01641 hydroxymethylglutaryl-CoA synthase [EC:2.3.3.10]	SPAC4F8.14c	59.02	[I] KOG1393 Hydroxymethylglutaryl-CoA synthase	gi|531863460|gb|EQL00745.1|	95.13	hydroxymethylglutaryl-CoA synthase [Ophiocordyceps sinensis CO18]	sp|P54874|HMCS_SCHPO	59.02	Hydroxymethylglutaryl-CoA synthase OS=Schizosaccharomyces pombe (strain 972 / ATCC 24843) GN=hcs1 PE=1 SV=1	GO:0004421,GO:0006084,GO:0006550,GO:0006552,GO:0006574,GO:0006696,GO:0008299,GO:0046950	12467	16559	2340	2263	1070	846	1220.94	1765.81	196.533	246.767	73.037	58.225	-4.42874	9.68633	2.82396e-17	3.739e-15
MSTRG.7150	rna5116-EQK99171.1	1146	ure:UREG_02676	53.63	hypothetical protein	Hs18921093	29.2	[PT] KOG3614 Ca2+/Mg2+-permeable cation channels (LTRPC family)	gi|531860827|gb|EQK99171.1|	100	Protein kinase-like domain protein [Ophiocordyceps sinensis CO18]	sp|Q6B9X6|VWKA_DICDI	29.9	Alpha-protein kinase vwkA OS=Dictyostelium discoideum GN=vwkA PE=1 SV=1	GO:0004674,GO:0005524,GO:0006468,GO:0009069	55	86	21	44	3	7	6.661	11.338	2.18	5.926	0.249	0.597	-4.28604	2.03977	4.50908e-07	7.80783e-06
MSTRG.3491	MSTRG.3491.1	3639	fgr:FG07891.1	81.77	hypothetical protein	-	-	-	gi|531864578|gb|EQL01617.1|	100	Glycosyl transferase, family 2 [Ophiocordyceps sinensis CO18]	sp|Q9WX75|BCSA5_KOMXY	31.06	Putative cellulose synthase 3 OS=Komagataeibacter xylinus GN=bcsABII-B PE=3 SV=1	GO:0008152,GO:0016740	5536	7973	690	551	380	690	198.677	299.671	22.247	21.467	9.744	16.682	-4.16342	8.59822	2.89601e-14	2.2784e-12
MSTRG.11107	MSTRG.11107.1	1196	fgr:FG08525.1	79.44	hypothetical protein	-	-	-	gi|531850914|gb|EQK97352.1|	100	Ferric reductase, NAD binding protein [Ophiocordyceps sinensis CO18]	-	-	-	GO:0016021,GO:0016491,GO:0055114	3091	2753	420	303	300	162	809.023	667.557	83.682	64.318	48.587	20.412	-4.15807	7.37588	5.02938e-16	5.10317e-14
MSTRG.10603	MSTRG.10603.1	1639	fgr:FG08525.1	67.79	hypothetical protein	-	-	-	gi|629694279|ref|XP_007812431.1|	74.76	ferric reductase [Metarhizium acridum CQMa 102]	-	-	-	GO:0016021,GO:0016491,GO:0055114	4525	2589	716	539	434	179	376.399	234.342	51.054	49.853	25.115	10.46	-4.02258	7.65425	1.91086e-12	1.1399e-10
MSTRG.7821	MSTRG.7821.1	1583	zma:100382687	53.77	hypothetical protein LOC100382687	-	-	-	gi|531859953|gb|EQK98770.1|	100	Glycoside hydrolase [Ophiocordyceps sinensis CO18]	sp|Q09788|ASL1_SCHPO	30.7	Alkali-sensitive linkage protein 1 OS=Schizosaccharomyces pombe (strain 972 / ATCC 24843) GN=asl1 PE=1 SV=1	GO:0005975,GO:0016787	2450.1	2924.66	822.08	859.38	447.93	95.01	354.631	461.56	101.755	138.167	45.167	9.671	-3.81709	7.28414	9.62306e-09	2.67891e-07
MSTRG.3041	rna2330-EQL01957.1	1149	fgr:FG10060.1	71.92	hypothetical protein; K14549 U3 small nucleolar RNA-associated protein 15	SPBC428.19c	44.71	[S] KOG0310 Conserved WD40 repeat-containing protein	gi|531864991|gb|EQL01957.1|	100	WD40 repeat-like-containing domain protein [Ophiocordyceps sinensis CO18]	sp|O94365|UTP15_SCHPO	44.71	U3 small nucleolar RNA-associated protein 15 OS=Schizosaccharomyces pombe (strain 972 / ATCC 24843) GN=utp15 PE=3 SV=1	GO:0005730,GO:0006364,GO:0019013,GO:0030529	1859	1078	938	521	171	133	224.306	141.721	96.931	69.92	14.375	11.277	-3.75461	6.3961	1.04893e-15	1.0448e-13
MSTRG.4681	rna3490-EQL00803.1	2651	ang:ANI_1_1752134	44.11	An15g07260; 2OG-Fe(II) oxygenase family oxidoreductase	At3g46490	22.89	[QR] KOG0143 Iron/ascorbate family oxidoreductases	gi|531863531|gb|EQL00803.1|	80.95	1-aminocyclopropane-1-carboxylate oxidase [Ophiocordyceps sinensis CO18]	sp|P40902|ISP7_SCHPO	27.15	Sexual differentiation process protein isp7 OS=Schizosaccharomyces pombe (strain 972 / ATCC 24843) GN=isp7 PE=2 SV=1	GO:0005506,GO:0016706,GO:0055114	372	622	127	28	10	105	40.984	75.827	12.163	3.449	0.797	8.188	-3.61234	4.87607	2.72096e-05	0.000260506
MSTRG.8748	MSTRG.8748.1	1686	cpw:CPC735_070800	36.13	oxidoreductase, 2OG-Fe(II) oxygenase family protein	-	-	-	gi|531858526|gb|EQK98296.1|	100	oxidoreductase [Ophiocordyceps sinensis CO18]	-	-	-	GO:0016706,GO:0046872,GO:0055114	213	125	13	6	12	27	19.555	12.454	0.983	0.617	0.772	1.694	-3.58533	3.3012	2.50313e-07	4.64554e-06
MSTRG.3056	rna2339-EQL01954.1	1176	mgr:MGG_10247	39.09	MG10247.4; hypothetical protein; K01175 [EC:3.1.-.-]	Hs4826884	33.57	[I] KOG3847 Phospholipase A2 (platelet-activating factor acetylhydrolase in humans)	gi|531864987|gb|EQL01954.1|	94.63	PAF acetylhydrolase family protein [Ophiocordyceps sinensis CO18]	sp|Q13093|PAFA_HUMAN	33.57	Platelet-activating factor acetylhydrolase OS=Homo sapiens GN=PLA2G7 PE=1 SV=1	GO:0003847,GO:0008247,GO:0016042,GO:0046486	455	1072	880	683	93	100	57.073	146.55	94.518	95.264	8.125	8.819	-3.5033	5.51155	1.11595e-09	3.8839e-08
MSTRG.2654	MSTRG.2654.1	3152	fgr:FG03975.1	50	hypothetical protein	YLR121c	26.84	[O] KOG1339 Aspartyl protease	gi|531865327|gb|EQL02244.1|	90.49	secreted aspartic proteinase [Ophiocordyceps sinensis CO18]	sp|Q4WDN4|OPSB_ASPFU	26.65	Probable aspartic-type endopeptidase opsB OS=Neosartorya fumigata (strain ATCC MYA-4609 / Af293 / CBS 101355 / FGSC A1100) GN=opsB PE=3 SV=1	GO:0004190,GO:0006508	12698.9	15970.9	4364.68	3322.47	2091.67	1714.78	626.988	818.208	184.63	181.247	72.681	58.129	-3.41871	9.73044	4.92504e-12	2.67356e-10
MSTRG.3963	MSTRG.3963.1	1664	ncr:NCU00787	49.24	hypothetical protein	SPBC16H5.10c	52.69	[A] KOG0925 mRNA splicing factor ATP-dependent RNA helicase	gi|531864161|gb|EQL01269.1|	100	pre-mRNA splicing factor ATP-dependent RNA helicase PRP43 [Ophiocordyceps sinensis CO18]	sp|O42945|DHX15_SCHPO	52.69	Probable pre-mRNA-splicing factor ATP-dependent RNA helicase prp43 OS=Schizosaccharomyces pombe (strain 972 / ATCC 24843) GN=prp43 PE=3 SV=1	GO:0004386,GO:0008152	49	64	4	2	7	8	3.827	5.431	0.38	0.24	0.382	0.614	-3.39277	1.78525	1.34844e-05	0.000142969
MSTRG.883	rna729-EQL03538.1	938	fgr:FG03358.1	43.87	hypothetical protein	SPAC8E11.04c	33.99	[I] KOG2112 Lysophospholipase	gi|531866750|gb|EQL03538.1|	100	acyl-protein thioesterase [Ophiocordyceps sinensis CO18]	sp|O42881|APTH1_SCHPO	33.99	Acyl-protein thioesterase 1 OS=Schizosaccharomyces pombe (strain 972 / ATCC 24843) GN=SPAC8E11.04c PE=3 SV=1	GO:0008152,GO:0016787	118.13	224.27	184.91	256.17	26.48	20.66	20.142	41.726	26.923	48.463	3.146	2.475	-3.37185	3.36691	6.64035e-07	1.09068e-05
MSTRG.2964	MSTRG.2964.1	5095	fgr:FG00916.1	86.86	hypothetical protein; K03006 DNA-directed RNA polymerase II subunit RPB1 [EC:2.7.7.6]	SPBC28F2.12	57.3	[K] KOG0260 RNA polymerase II, large subunit	gi|629705559|ref|XP_007816847.1|	91.51	DNA-directed RNA polymerase II largest subunit [Metarhizium anisopliae ARSEF 23]	sp|P36594|RPB1_SCHPO	57.3	DNA-directed RNA polymerase II subunit rpb1 OS=Schizosaccharomyces pombe (strain 972 / ATCC 24843) GN=rpb1 PE=1 SV=1	GO:0003677,GO:0003899,GO:0005665,GO:0005730,GO:0006144,GO:0006206,GO:0006366	13199	6907	14931	13085	1622	1152	311.705	177.227	303.762	345.386	26.717	19.113	-3.33882	9.20018	1.28714e-10	5.48019e-09
MSTRG.3495	MSTRG.3495.1	2233	act:ACLA_060930	41.49	hypothetical protein	-	-	-	gi|531864579|gb|EQL01618.1|	92.12	glycoside hydrolase family 12 [Ophiocordyceps sinensis CO18]	sp|A1CRJ0|XGEA_ASPCL	29.94	Probable xyloglucan-specific endo-beta-1,4-glucanase A OS=Aspergillus clavatus (strain ATCC 1007 / CBS 513.65 / DSM 816 / NCTC 3887 / NRRL 1) GN=xgeA PE=3 SV=1	GO:0000272,GO:0005982,GO:0005985,GO:0008810	3059	4754	270	140	505	632	393.402	683.585	28.936	19.513	37.382	48.414	-3.28997	7.87269	3.69418e-11	1.71401e-09
MSTRG.4796	MSTRG.4796.2	6213	fgr:FG08422.1	57.39	hypothetical protein; K10589 ubiquitin-protein ligase E3 C [EC:6.3.2.19]	SPAC167.07c	38.23	[O] KOG0942 E3 ubiquitin protein ligase	gi|531863412|gb|EQL00708.1|	96.47	E3 ubiquitin-protein ligase [Ophiocordyceps sinensis CO18]	sp|Q1K9C4|YFK7_SCHPO	38.23	Probable E3 ubiquitin protein ligase C167.07c OS=Schizosaccharomyces pombe (strain 972 / ATCC 24843) GN=SPAC167.07c PE=2 SV=1	GO:0004842,GO:0016567,GO:0016874	7828.73	4379.1	3486.78	1031.71	957.47	860.68	240.372	146.086	89.908	33.622	19.463	17.305	-3.22908	8.49256	6.48928e-11	2.87568e-09
MSTRG.3201	rna2444-EQL01842.1	1531	bfu:BC1G_13792	80.2	acyl-CoA desaturase ; K00507 stearoyl-CoA desaturase (delta-9 desaturase) [EC:1.14.19.1]	SPCC1281.06c_1	61.42	[I] KOG1600 Fatty acid desaturase	gi|531864851|gb|EQL01842.1|	99.48	acyl-CoA desaturase [Ophiocordyceps sinensis CO18]	sp|Q12618|ACO1_AJECA	80.05	Acyl-CoA desaturase OS=Ajellomyces capsulatus GN=OLE1 PE=3 SV=1	GO:0004768,GO:0005506,GO:0005783,GO:0006633,GO:0016021,GO:0020037,GO:0055114	2349	4306	656	163	463	559	222.578	444.239	53.317	17.203	30.576	37.226	-3.21705	7.65277	2.98987e-10	1.18471e-08
MSTRG.6193	MSTRG.6193.1	7508	fgr:FG05322.1	81.59	hypothetical protein; K00668 fatty acid synthase subunit beta, fungi type [EC:2.3.1.86]	-	-	-	gi|531861874|gb|EQK99784.1|	100	fatty acid synthase beta subunit dehydratase [Ophiocordyceps sinensis CO18]	sp|P34229|FAS1_YARLI	57.54	Fatty acid synthase subunit beta OS=Yarrowia lipolytica (strain CLIB 122 / E 150) GN=FAS1 PE=3 SV=2	GO:0004318,GO:0004319,GO:0005739,GO:0005811,GO:0005835,GO:0006633,GO:0006807,GO:0016409,GO:0018580,GO:0019171,GO:0042967,GO:0055114	2846	3800	2750	2319	550	488	48.165	67.662	40.181	44.774	6.499	5.625	-3.18557	7.64509	1.77941e-11	8.86196e-10
MSTRG.3932	MSTRG.3932.1	2273	fgr:FG07333.1	76.39	hypothetical protein	YBR101c	40.8	[O] KOG2160 Armadillo/beta-catenin-like repeat-containing protein	gi|531864195|gb|EQL01299.1|	99.57	54S ribosomal protein L7 [Ophiocordyceps sinensis CO18]	sp|Q4I624|FES1_GIBZE	69.13	Hsp70 nucleotide exchange factor FES1 OS=Gibberella zeae (strain PH-1 / ATCC MYA-4620 / FGSC 9075 / NRRL 31084) GN=FES1 PE=3 SV=1	GO:0003735,GO:0005840,GO:0006412,GO:0042254	7927.45	5638.49	4338.28	2651.8	1092.26	1029.57	473.18	366.054	222.584	176.586	54.388	49.792	-3.16464	8.65773	2.81548e-11	1.34659e-09
MSTRG.3344	rna2565-EQL01713.1	1721	nfi:NFIA_086990	57.58	mitochondrial DnaJ chaperone (Mdj1), putative; K03686 molecular chaperone DnaJ	SPCC4G3.14	42.86	[O] KOG0715 Molecular chaperone (DnaJ superfamily)	gi|531864693|gb|EQL01713.1|	95.71	Heat shock protein DnaJ [Ophiocordyceps sinensis CO18]	sp|C8V213|MDJ1_EMENI	56.29	DnaJ homolog 1, mitochondrial OS=Emericella nidulans (strain FGSC A4 / ATCC 38163 / CBS 112.46 / NRRL 194 / M139) GN=AN10778 PE=3 SV=1	GO:0005524,GO:0006457,GO:0009408,GO:0016491,GO:0031072,GO:0046872,GO:0051082,GO:0055114	13505	11250	11864	5291	2130	1760	1101.02	998.206	830.321	480.689	121.06	100.831	-3.16357	9.53016	3.45422e-11	1.62348e-09
MSTRG.2786	MSTRG.2786.1	2562	fgr:FG09830.1	79.15	hypothetical protein; K07750 methylsterol monooxygenase [EC:1.14.13.72]	YGR060w	59.77	[I] KOG0873 C-4 sterol methyl oxidase	gi|531865204|gb|EQL02134.1|	100	C-4 sterol methyl oxidase [Ophiocordyceps sinensis CO18]	sp|O59933|MSMO_CANAL	59.4	Methylsterol monooxygenase OS=Candida albicans (strain SC5314 / ATCC MYA-2876) GN=ERG25 PE=3 SV=1	GO:0004497,GO:0005506,GO:0006633,GO:0016021,GO:0055114	1947.1	3287.87	1130.31	1896.84	552.27	292.63	156.146	274.538	73.282	171.475	32.103	16.752	-3.14732	7.31136	2.06581e-09	6.67513e-08
MSTRG.2981	rna2291-EQL02007.1	3036	fgr:FG00906.1	78.42	hypothetical protein; K01872 alanyl-tRNA synthetase [EC:6.1.1.7]	YOR335c	56.9	[J] KOG0188 Alanyl-tRNA synthetase	gi|531865049|gb|EQL02007.1|	99.54	alanyl-tRNA synthetase [Ophiocordyceps sinensis CO18]	sp|Q5AQL1|SYA_EMENI	61.65	Alanine--tRNA ligase OS=Emericella nidulans (strain FGSC A4 / ATCC 38163 / CBS 112.46 / NRRL 194 / M139) GN=ala1 PE=3 SV=2	GO:0000049,GO:0004813,GO:0005524,GO:0005739,GO:0006522,GO:0006531,GO:0008270,GO:0070143	9777	5659	5432	2134	1506	966	418.105	263.087	199.882	101.901	44.918	29.021	-3.12709	8.84206	8.60375e-10	3.10335e-08
MSTRG.7435	MSTRG.7435.1	1408	fgr:FG00313.1	60.23	hypothetical protein	-	-	-	gi|629693365|ref|XP_007811974.1|	73.1	C6 transcription factor [Metarhizium acridum CQMa 102]	-	-	-	GO:0000981,GO:0005634,GO:0006357,GO:0008270	1142	932	500	779	211	128	140.904	123.799	51.824	105.162	17.977	11.382	-3.10672	5.95992	5.86141e-11	2.61882e-09
MSTRG.4721	MSTRG.4721.1	4557	cdu:CD36_71850	72.34	ATP-dependent molecular chaperone, HSP90 family, putative; K04079 molecular chaperone HtpG	YMR186w	76.59	[O] KOG0019 Molecular chaperone (HSP90 family)	gi|531863491|gb|EQL00771.1|	100	heat shock protein 90 [Ophiocordyceps sinensis CO18]	sp|O43109|HSP90_PODAS	88.64	Heat shock protein 90 homolog OS=Podospora anserina GN=MOD-E PE=3 SV=1	GO:0005524,GO:0006457,GO:0006950,GO:0051082	3424.92	4102.05	2299.15	721.29	489.24	752.33	186.765	243.158	108.193	43.979	31.348	33.715	-3.10135	7.83003	1.6694e-10	6.9443e-09
MSTRG.162	rna122-EQL04164.1	1175	fgr:FG06035.1	86.35	similar to AF429823_1 septin 3	SPAC821.06	60.33	[DTZ] KOG1547 Septin CDC10 and related P-loop GTPases	gi|531867405|gb|EQL04164.1|	94.6	cell division control protein 10 [Ophiocordyceps sinensis CO18]	sp|Q09116|SPN2_SCHPO	60.33	Septin homolog spn2 OS=Schizosaccharomyces pombe (strain 972 / ATCC 24843) GN=spn2 PE=1 SV=2	GO:0000144,GO:0000921,GO:0001400,GO:0003924,GO:0005525,GO:0005545,GO:0005628,GO:0005876,GO:0006184,GO:0010458,GO:0031105,GO:0032160,GO:0032947,GO:0043332,GO:0043934,GO:0051301,GO:0072687	4915	6698	2161	2619	1061	920	689.492	1024.37	259.313	408.198	103.697	90.721	-3.05924	8.46365	2.05499e-10	8.41064e-09
MSTRG.6068	MSTRG.6068.1	477	ang:ANI_1_724114	60.87	An13g02430; polyketide synthase	CE04187_1	36.99	[I] KOG1202 Animal-type fatty acid synthase and related proteins	gi|615404519|ref|XP_007581405.1|	75.36	putative polyketide synthase protein [Neofusicoccum parvum UCRNP2]	sp|Q9Y7D5|LOVF_ASPTE	44.78	Lovastatin diketide synthase LovF OS=Aspergillus terreus GN=lovF PE=1 SV=1	GO:0003824,GO:0008152	129	79	214	884	23	12	67.166	45.338	93.155	501.581	8.308	4.397	-3.04772	2.66059	1.75128e-05	0.000180053
MSTRG.3479	rna2664-EQL01625.1	3457	pan:PODANSg415	84	hypothetical protein; K03235 elongation factor 3	YNL014w_2	72.87	[EJ] KOG0062 ATPase component of ABC transporters with duplicated ATPase domains/Translation elongation factor EF-3b	gi|531864588|gb|EQL01625.1|	97.85	elongation factor 3 [Ophiocordyceps sinensis CO18]	sp|O93796|EF3_CANGA	64.46	Elongation factor 3 OS=Candida glabrata (strain ATCC 2001 / CBS 138 / JCM 3761 / NBRC 0622 / NRRL Y-65) GN=TEF3 PE=3 SV=2	GO:0003746,GO:0005524,GO:0006200,GO:0006415,GO:0006448,GO:0016887,GO:0022626	8519	14200	9964	7730	2276	1660	327.748	593.849	329.943	332.144	61.069	44.869	-3.04365	9.43901	3.3771e-09	1.03574e-07
MSTRG.6979	MSTRG.6979.1	1181	fgr:FG07377.1	68.82	hypothetical protein	SPBC36B7.08c	32.33	[L] KOG1508 DNA replication factor/protein phosphatase inhibitor SET/SPR-2	gi|358389816|gb|EHK27408.1|	78.11	hypothetical protein TRIVIDRAFT_215132 [Trichoderma virens Gv29-8]	sp|Q9HGN2|YO48_SCHPO	32.33	Putative nucleosome assembly protein C36B7.08c OS=Schizosaccharomyces pombe (strain 972 / ATCC 24843) GN=SPBC36B7.08c PE=1 SV=1	GO:0005634,GO:0006334	938	2114	722	910	274	268	129.512	318.195	85.287	139.609	26.36	26.011	-3.01349	6.55507	2.85256e-09	8.95095e-08
MSTRG.11173	MSTRG.11173.1	922	fgr:FG05481.1	60.36	hypothetical protein	-	-	-	gi|531850408|gb|EQK97329.1|	100	hypothetical protein OCS_06958 [Ophiocordyceps sinensis CO18]	sp|Q8W0Z7|BCAL1_ARATH	30.6	Branched-chain-amino-acid aminotransferase-like protein 1 OS=Arabidopsis thaliana GN=At3g05190 PE=2 SV=1	GO:0008152,GO:0016740	2877	1749	1918	533	273	551	465.096	309.379	264.537	105.977	39.183	79.524	-2.96851	7.12276	6.91238e-09	1.97494e-07
MSTRG.10877	MSTRG.10877.1	1371	fgr:FG06849.1	55.64	hypothetical protein; K12858 ATP-dependent RNA helicase DDX23/PRP28 [EC:3.6.4.13]	-	-	-	gi|629684119|ref|XP_007807355.1|	64.52	pre-mRNA-splicing ATP-dependent RNA helicase PRP28 [Metarhizium acridum CQMa 102]	sp|Q4I7F9|PRP28_GIBZE	55.64	Pre-mRNA-splicing ATP-dependent RNA helicase PRP28 OS=Gibberella zeae (strain PH-1 / ATCC MYA-4620 / FGSC 9075 / NRRL 31084) GN=PRP28 PE=3 SV=1	GO:0000166,GO:0004386,GO:0008152	532.09	205.71	339.11	80.8	90.23	52.54	56.903	24.118	31.209	9.364	6.515	3.765	-2.83987	4.48349	5.02983e-06	6.0953e-05
MSTRG.10437	MSTRG.10437.1	2375	ncr:NCU05278	69.94	cytochrome P450 61	YMR015c	49.89	[QI] KOG0157 Cytochrome P450 CYP4/CYP19/CYP26 subfamilies	gi|531854265|gb|EQK97534.1|	95.67	cytochrome P450 61 [Ophiocordyceps sinensis CO18]	sp|P54781|ERG5_YEAST	49.89	Cytochrome P450 61 OS=Saccharomyces cerevisiae (strain ATCC 204508 / S288c) GN=ERG5 PE=1 SV=1	GO:0004497,GO:0005506,GO:0016705,GO:0020037,GO:0055114	3305	5211	589	330	1016	723	199.885	342.727	30.838	22.7	42.893	30.793	-2.80491	8.0499	1.29867e-08	3.49001e-07
MSTRG.2030	MSTRG.2030.1	2982	fgr:FG06154.1	86.64	similar to 70 kDa heat shock protein; K04043 molecular chaperone DnaK	YJR045c	71.93	[O] KOG0102 Molecular chaperones mortalin/PBP74/GRP75, HSP70 superfamily	gi|531865828|gb|EQL02692.1|	93	heat shock 70 kDa protein [Ophiocordyceps sinensis CO18]	sp|Q5B0C0|HSP7M_EMENI	80.03	Heat shock 70 kDa protein OS=Emericella nidulans (strain FGSC A4 / ATCC 38163 / CBS 112.46 / NRRL 194 / M139) GN=AN6010 PE=1 SV=1	GO:0005524,GO:0005739,GO:0006626,GO:0042026,GO:0051082	14147.3	15369.4	22327.5	14403.7	3376.99	2767.51	651.94	737.991	911.146	757.075	107.141	83.183	-2.76566	9.83706	5.69489e-09	1.67106e-07
MSTRG.8248	MSTRG.8248.1	2490	pno:SNOG_09267	52.92	hypothetical protein; K09510 DnaJ homolog subfamily B member 4	At2g20560	36.19	[O] KOG0714 Molecular chaperone (DnaJ superfamily)	gi|697091552|ref|XP_009658509.1|	60.38	psi1 [Verticillium dahliae VdLs.17]	sp|Q09912|PSI1_SCHPO	48.91	Protein psi1 OS=Schizosaccharomyces pombe (strain 972 / ATCC 24843) GN=psi1 PE=2 SV=2	GO:0006457,GO:0051082	15983	15993	11142	10553	3606	3221	1546.3	1673.95	940.806	1165.14	232.973	197.572	-2.7264	9.95521	6.76368e-09	1.94268e-07
MSTRG.2585	MSTRG.2585.2	3758	ncr:NCU06230	58.4	hypothetical protein	SPBC16E9.13	44.54	[T] KOG0583 Serine/threonine protein kinase	gi|531865356|gb|EQL02267.1|	100	Protein kinase-like domain protein [Ophiocordyceps sinensis CO18]	sp|O14328|KSP1_SCHPO	44.54	Serine/threonine-protein kinase ksp1 OS=Schizosaccharomyces pombe (strain 972 / ATCC 24843) GN=ksp1 PE=1 SV=1	GO:0004674,GO:0005524,GO:0006468,GO:0009069	37890.7	30693.3	21216.9	7763.15	8151.67	6587.71	1785.92	1619.38	799.817	382.624	250.709	187.611	-2.7112	11.0518	1.30849e-08	3.49907e-07
MSTRG.2277	MSTRG.2277.2	3746	fgr:FG00524.1	82.51	hypothetical protein; K00963 UTP--glucose-1-phosphate uridylyltransferase [EC:2.7.7.9]	SPCC1322.04	62.19	[G] KOG2638 UDP-glucose pyrophosphorylase	gi|531865623|gb|EQL02508.1|	88.48	UTP-glucose-1-phosphate uridylyltransferase [Ophiocordyceps sinensis CO18]	sp|P78811|UGPA1_SCHPO	62.19	Probable UTP--glucose-1-phosphate uridylyltransferase OS=Schizosaccharomyces pombe (strain 972 / ATCC 24843) GN=fuy1 PE=1 SV=2	GO:0003983,GO:0005737,GO:0005978,GO:0005982,GO:0005985,GO:0005992,GO:0006011,GO:0006012,GO:0006078	5697	10474	1000	325	2056	1625	354.755	748.94	55.377	23.913	97.455	70.783	-2.65199	8.99911	2.08847e-07	3.97102e-06
MSTRG.3629	MSTRG.3629.1	2865	pan:PODANSg09690	35.67	hypothetical protein	-	-	-	gi|531864448|gb|EQL01509.1|	97	transcription factor AbaA [Ophiocordyceps sinensis CO18]	-	-	-	GO:0003700,GO:0005634,GO:0005667,GO:0006355,GO:0045449	1890	3163	1933	2273	585	564	84.667	154.062	74.507	113.69	18.276	17.753	-2.64959	7.3192	2.96852e-08	7.26446e-07
MSTRG.541	MSTRG.541.1	2738	fgr:FG07918.1	55.7	hypothetical protein	-	-	-	gi|531867078|gb|EQL03851.1|	99.35	Six-bladed beta-propeller, TolB-like protein [Ophiocordyceps sinensis CO18]	sp|Q62087|PON3_MOUSE	25.83	Serum paraoxonase/lactonase 3 OS=Mus musculus GN=Pon3 PE=1 SV=2	GO:0004064,GO:0008152	10193.5	16263.1	5904.13	1513.09	3041.06	3130.17	819.997	1411.05	411.194	133.077	170.111	167.902	-2.61152	9.71102	1.27485e-07	2.57747e-06
MSTRG.2959	MSTRG.2959.1	4153	fgr:FG01265.1	84.64	hypothetical protein; K05853 Ca2+ transporting ATPase, sarcoplasmic/endoplasmic reticulum [EC:3.6.3.8]	CE18885	54.2	[P] KOG0202 Ca2+ transporting ATPase	gi|531865057|gb|EQL02013.1|	99.66	ATPase, P-type, calcium-transporting [Ophiocordyceps sinensis CO18]	sp|Q7PPA5|ATC1_ANOGA	55.01	Calcium-transporting ATPase sarcoplasmic/endoplasmic reticulum type OS=Anopheles gambiae GN=Ca-P60A PE=3 SV=5	GO:0005388,GO:0005524,GO:0008152,GO:0016021,GO:0016529,GO:0046872,GO:0070588	4997.59	3878.89	5478.52	3439.24	1095.8	956.07	188.391	157.474	170.018	139.923	28.385	25.133	-2.60428	8.11583	1.15476e-08	3.15799e-07
MSTRG.5335	rna3968-EQL00326.1	2108	fgr:FG06173.1	66.83	hypothetical protein	YDR338c	43.14	[R] KOG1347 Uncharacterized membrane protein, predicted efflux pump	gi|531862897|gb|EQL00326.1|	92.62	Multi antimicrobial extrusion protein [Ophiocordyceps sinensis CO18]	sp|Q05497|YD338_YEAST	43.14	Uncharacterized transporter YDR338C OS=Saccharomyces cerevisiae (strain ATCC 204508 / S288c) GN=YDR338C PE=1 SV=1	GO:0005634,GO:0006281,GO:0006855,GO:0008081,GO:0015238,GO:0015297,GO:0016020	1283	1648	2027	4651	370	326	85.954	120.112	116.673	347.487	17.28	15.348	-2.57984	6.53635	1.9119e-09	6.27113e-08
MSTRG.4129	MSTRG.4129.1	3613	fgr:FG09019.1	71.03	hypothetical protein	SPAC32A11.03c	29.45	[K] KOG0849 Transcription factor PRD and related proteins, contain PAX and HOX domains	gi|531864014|gb|EQL01168.1|	99.76	homeoprotein [Ophiocordyceps sinensis CO18]	sp|Q99160|HOY1_YARLI	57.81	Homeobox protein HOY1 OS=Yarrowia lipolytica (strain CLIB 122 / E 150) GN=HOY1 PE=3 SV=2	GO:0005634,GO:0006355,GO:0043565	15572.3	18340.3	3428.82	6866.2	4940.15	3268.04	693.873	848.22	151.5	373.364	163.388	103.103	-2.55192	10.069	1.71062e-07	3.35239e-06
MSTRG.968	MSTRG.968.1	4307	fgr:FG09197.1	72.18	hypothetical protein; K00021 hydroxymethylglutaryl-CoA reductase (NADPH) [EC:1.1.1.34]	YLR450w	55.71	[I] KOG2480 3-hydroxy-3-methylglutaryl-CoA (HMG-CoA) reductase	gi|531866708|gb|EQL03499.1|	97.6	HMG CoA reductase [Ophiocordyceps sinensis CO18]	sp|S0DQM8|HMDH_GIBF5	74.02	3-hydroxy-3-methylglutaryl-coenzyme A reductase OS=Gibberella fujikuroi (strain CBS 195.34 / IMI 58289 / NRRL A-6831) GN=HMGR PE=3 SV=1	GO:0004420,GO:0005789,GO:0007165,GO:0008158,GO:0008299,GO:0015936,GO:0016021,GO:0016126,GO:0050661,GO:0055114	4421	5131	3258	7730	1263	1049	142.676	183.673	88.924	272.352	27.771	24.115	-2.55007	8.24118	2.70956e-08	6.76269e-07
MSTRG.3745	MSTRG.3745.1	2192	pan:PODANSg6566	82.71	hypothetical protein; K02925 large subunit ribosomal protein L3e	SPAC17A5.03	64.31	[J] KOG0746 60S ribosomal protein L3 and related proteins	gi|531864343|gb|EQL01421.1|	88.18	60S ribosomal protein L3 [Ophiocordyceps sinensis CO18]	sp|P59671|RL3_NEUCR	79.54	60S ribosomal protein L3 OS=Neurospora crassa (strain ATCC 24698 / 74-OR23-1A / CBS 708.71 / DSM 1257 / FGSC 987) GN=rpl-3 PE=3 SV=1	GO:0003735,GO:0005840,GO:0006412,GO:0042254	13822.5	10344.7	677.13	186.83	3620.68	2221.84	1448.16	1178.4	57.362	19.011	262.96	163.918	-2.54054	9.56859	1.9751e-07	3.78196e-06
MSTRG.2394	MSTRG.2394.1	3972	fgr:FG06825.1	79.57	hypothetical protein; K09503 DnaJ homolog subfamily A member 2	SPBC1734.11	50.34	[O] KOG0712 Molecular chaperone (DnaJ superfamily)	gi|531865520|gb|EQL02414.1|	95.67	DnaJ domain-containing protein [Ophiocordyceps sinensis CO18]	sp|O74752|MAS5_SCHPO	50.34	Mitochondrial protein import protein mas5 OS=Schizosaccharomyces pombe (strain 972 / ATCC 24843) GN=mas5 PE=3 SV=1	GO:0005488,GO:0006396,GO:0032259	20441.3	18622.5	23943	20666.5	5182.37	4354.51	1252.15	1160.43	1271.59	1418.54	210.448	171.491	-2.53051	10.2685	7.34598e-08	1.58235e-06
MSTRG.9077	MSTRG.9077.1	3221	fgr:FG01199.1	74.36	hypothetical protein; K00820 glucosamine--fructose-6-phosphate aminotransferase (isomerizing) [EC:2.6.1.16]	YKL104c	63.42	[M] KOG1268 Glucosamine 6-phosphate synthetases, contain amidotransferase and phosphosugar isomerase domains	gi|531857835|gb|EQK98125.1|	82.33	glutamine:fructose-6-phosphate amidotransferase [Ophiocordyceps sinensis CO18]	sp|P14742|GFA1_YEAST	63.42	Glutamine--fructose-6-phosphate aminotransferase [isomerizing] OS=Saccharomyces cerevisiae (strain ATCC 204508 / S288c) GN=GFA1 PE=1 SV=4	GO:0004360,GO:0030246,GO:0034221	10159.5	27755.6	5439.55	2691.59	4816.24	4643.53	439.41	1305.34	207.638	131.917	151.536	141.11	-2.52842	10.2558	9.85728e-06	0.000108982
MSTRG.10558	MSTRG.10558.1	662	fgr:FG00173.1	57.82	hypothetical protein	-	-	-	gi|594716200|gb|EXU99105.1|	72.6	glycoside hydrolase family 16 protein [Metarhizium robertsii]	sp|Q8J0P4|CRF1_ASPFU	48.65	Probable glycosidase crf1 OS=Neosartorya fumigata (strain ATCC MYA-4609 / Af293 / CBS 101355 / FGSC A1100) GN=crf1 PE=1 SV=2	GO:0004553,GO:0005975	280.16	119.11	0	24.29	45.87	51.26	69.854	32.483	0	6.689	7.959	8.986	-2.51091	3.64908	7.50079e-05	0.000614612
MSTRG.10857	rna6883-EQK97403.1	1540	fgr:FG00665.1	79.25	hypothetical protein; K05544 tRNA-dihydrouridine synthase 3 [EC:1.-.-.-]	SPAC16.04	44.47	[R] KOG2333 Uncharacterized conserved protein	gi|531852387|gb|EQK97403.1|	100	tRNA-dihydrouridine synthase 3 [Ophiocordyceps sinensis CO18]	sp|A7EKL8|DUS3_SCLS1	67.47	tRNA-dihydrouridine(47) synthase [NAD(P)(+)] OS=Sclerotinia sclerotiorum (strain ATCC 18683 / 1980 / Ss-1) GN=dus3 PE=3 SV=1	GO:0002943,GO:0017150,GO:0046872,GO:0050660,GO:0055114	593	605	636	400	148	152	54.295	60.3	49.959	40.792	9.445	9.776	-2.49497	5.25345	1.72221e-07	3.36902e-06
MSTRG.9612	rna6435-EQK97851.1	2731	mgr:MGG_05193	97.21	MG05193.4; cell division control protein Cdc48; K13525 transitional endoplasmic reticulum ATPase	YDL126c	86.23	[O] KOG0730 AAA+-type ATPase	gi|531856712|gb|EQK97851.1|	99.4	cell division cycle protein [Ophiocordyceps sinensis CO18]	sp|Q5AWS6|CDC48_EMENI	93.01	Cell division control protein 48 OS=Emericella nidulans (strain FGSC A4 / ATCC 38163 / CBS 112.46 / NRRL 194 / M139) GN=cdc48 PE=1 SV=2	GO:0005524,GO:0008152,GO:0016787,GO:0043581,GO:0051301	15200	10406	16748	7826	3237	3137	766.617	570.685	726.497	440.556	113.847	111.168	-2.49332	9.65641	1.19279e-07	2.43882e-06
MSTRG.3703	MSTRG.3703.1	1913	fgr:FG09413.1	71.37	hypothetical protein	YKL027w	41.47	[O] KOG2018 Predicted dinucleotide-utilizing enzyme involved in molybdopterin and thiamine biosynthesis	gi|531864383|gb|EQL01456.1|	100	Molybdenum cofactor biosynthesis, MoeB [Ophiocordyceps sinensis CO18]	sp|P36101|TCD2_YEAST	41.47	tRNA threonylcarbamoyladenosine dehydratase 2 OS=Saccharomyces cerevisiae (strain ATCC 204508 / S288c) GN=TCD2 PE=1 SV=1	GO:0008152,GO:0016874	482	365	168	28	137	81	33.205	29.222	10.177	2.477	6.582	3.923	-2.44919	4.7532	5.30592e-06	6.38652e-05
MSTRG.1062	MSTRG.1062.1	2346	fgr:FG04171.1	71.79	hypothetical protein; K00627 pyruvate dehydrogenase E2 component (dihydrolipoamide acetyltransferase) [EC:2.3.1.12]	YNL071w	45.22	[C] KOG0557 Dihydrolipoamide acetyltransferase	gi|531866611|gb|EQL03407.1|	100	dihydrolipoamide acetyltransferase component [Ophiocordyceps sinensis CO18]	sp|P20285|ODP2_NEUCR	70.66	Dihydrolipoyllysine-residue acetyltransferase component of pyruvate dehydrogenase complex, mitochondrial OS=Neurospora crassa (strain ATCC 24698 / 74-OR23-1A / CBS 708.71 / DSM 1257 / FGSC 987) GN=mrp-3 PE=1 SV=2	GO:0004742,GO:0005967,GO:0006086,GO:0006094,GO:0006096,GO:0042967	3654	3766	874	504	1010	923	264.906	297.226	55.229	40.415	52.853	46.168	-2.43992	7.89003	5.22446e-08	1.17681e-06
MSTRG.2515	MSTRG.2515.1	14956	fgr:FG07258.1	70.78	hypothetical protein; K14572 midasin	YLR106c	46.02	[R] KOG1808 AAA ATPase containing von Willebrand factor type A (vWA) domain	gi|531865422|gb|EQL02325.1|	99.76	ATPase, AAA-5 [Ophiocordyceps sinensis CO18]	sp|Q12019|MDN1_YEAST	46.02	Midasin OS=Saccharomyces cerevisiae (strain ATCC 204508 / S288c) GN=MDN1 PE=1 SV=1	GO:0005524,GO:0005634,GO:0006200,GO:0006461,GO:0016887	2289	3117	9138	5318	551	875	17.794	26.312	61.259	46.247	2.988	4.783	-2.42696	7.44354	4.13324e-07	7.28484e-06
MSTRG.11085	MSTRG.11085.1	1343	fgr:FG05687.1	79.58	hypothetical protein; K14776 ATP-dependent RNA helicase DDX10/DBP4 [EC:3.6.4.13]	SPAC1093.05	50.47	[A] KOG0343 RNA Helicase	gi|672794737|gb|KFH45304.1|	80.61	ATP-dependent RNA helicase-like protein [Acremonium chrysogenum ATCC 11550]	sp|Q4IAS1|DBP4_GIBZE	79.58	ATP-dependent RNA helicase DBP4 OS=Gibberella zeae (strain PH-1 / ATCC MYA-4620 / FGSC 9075 / NRRL 31084) GN=DBP4 PE=3 SV=1	GO:0003723,GO:0005524,GO:0006200,GO:0008026	286	413	577	772	87	98	28.621	45.012	49.523	86.025	6.067	6.898	-2.42387	4.49954	7.28385e-06	8.3772e-05
MSTRG.2538	MSTRG.2538.1	5672	fgr:FG06568.1	56.68	hypothetical protein	-	-	-	gi|531865411|gb|EQL02315.1|	100	HET-s/LopB domain-containing protein [Ophiocordyceps sinensis CO18]	-	-	-	GO:0008152,GO:0016772	5129.34	8596.47	14145.3	27923.2	1537.66	2130.53	156.823	284.508	378.38	977.724	31.265	43.992	-2.41445	8.79507	1.4761e-06	2.17154e-05
MSTRG.6156	MSTRG.6156.1	2131	fgr:FG00634.1	72.68	hypothetical protein; K02991 small subunit ribosomal protein S6e	SPAPB1E7.12	61.03	[J] KOG1646 40S ribosomal protein S6	gi|584127203|gb|EWG36622.1|	72.48	40S ribosomal protein S6-B [Fusarium verticillioides 7600]	sp|Q6BXH8|RS6_DEBHA	65.64	40S ribosomal protein S6 OS=Debaryomyces hansenii (strain ATCC 36239 / CBS 767 / JCM 1990 / NBRC 0083 / IGC 2968) GN=RPS6 PE=3 SV=1	GO:0002376,GO:0005840,GO:0010467,GO:0044238,GO:0044260,GO:0044763,GO:0048731,GO:0050794	9725.38	8384.47	1240.27	550.83	1993.17	2784.94	1392.72	1239.16	139.022	68.279	199.699	252.006	-2.41402	9.17569	2.92436e-07	5.34509e-06
MSTRG.6986	rna5013-EQK99273.1	5789	aor:AOR_1_584034	40.54	AO090103000355; hypothetical protein	SPAC23G3.02c	25.85	[Q] KOG1178 Non-ribosomal peptide synthetase/alpha-aminoadipate reductase and related enzymes	gi|531861015|gb|EQK99273.1|	100	non-ribosomal peptide synthetase [Ophiocordyceps sinensis CO18]	sp|Q4WLW5|NRP12_ASPFU	36.95	Nonribosomal peptide synthetase 12 OS=Neosartorya fumigata (strain ATCC MYA-4609 / Af293 / CBS 101355 / FGSC A1100) GN=NRPS12 PE=1 SV=1	GO:0003824,GO:0008152	8033	9291	10183	1684	1798	2880	165.291	207.703	180.548	38.733	25.812	41.631	-2.38855	9.12451	8.16198e-07	1.31281e-05
MSTRG.4218	MSTRG.4218.1	1575	pan:PODANSg8144	59.78	hypothetical protein	Hs4757702	30.48	[J] KOG1669 Predicted mRNA cap-binding protein related to eIF-4E	gi|672796834|gb|KFH47377.1|	68.85	Eukaryotic translation initiation factor 4E type-like protein [Acremonium chrysogenum ATCC 11550]	sp|O60573|IF4E2_HUMAN	30.48	Eukaryotic translation initiation factor 4E type 2 OS=Homo sapiens GN=EIF4E2 PE=1 SV=1	GO:0003723,GO:0006412	4088	3234	1693	852	1007	981	376.399	324.178	133.734	87.373	64.63	63.473	-2.3721	7.87382	1.13099e-07	2.33002e-06
MSTRG.7079	MSTRG.7079.1	3371	fgr:FG05514.1	64.95	hypothetical protein	At3g07020	46.98	[GC] KOG1192 UDP-glucuronosyl and UDP-glucosyl transferase	gi|530472808|gb|EQB53341.1|	63.63	hypothetical protein CGLO_06946 [Colletotrichum gloeosporioides Cg-14]	sp|Q9M8Z7|U80A2_ARATH	46.98	Sterol 3-beta-glucosyltransferase UGT80A2 OS=Arabidopsis thaliana GN=UGT80A2 PE=1 SV=1	GO:0005975,GO:0016740	2603	1695	1532	991	819	352	93.631	66.27	47.436	39.82	20.55	8.898	-2.36568	7.10109	2.76064e-06	3.6821e-05
MSTRG.5206	rna3869-EQL00415.1	558	fgr:FG10131.1	50.81	hypothetical protein	-	-	-	gi|531863011|gb|EQL00415.1|	80	amidohydrolase family protein [Ophiocordyceps sinensis CO18]	sp|A3LZU8|RMGL_PICST	31.78	L-rhamnono-gamma-lactonase OS=Scheffersomyces stipitis (strain ATCC 58785 / CBS 6054 / NBRC 10063 / NRRL Y-11545) GN=LRA2 PE=1 SV=2	GO:0008152,GO:0016787	280	279	278	218	69	84	127.175	139.413	105.985	108.266	21.762	26.862	-2.36406	4.17785	1.11338e-05	0.000121064
MSTRG.8202	MSTRG.8202.1	5479	fgr:FG02561.1	67.05	hypothetical protein; K14792 rRNA biogenesis protein RRP5	SPCC1183.07	38	[A] KOG1070 rRNA processing protein Rrp5	gi|531859384|gb|EQK98580.1|	97.48	Nucleic acid-binding, OB-fold-like protein [Ophiocordyceps sinensis CO18]	sp|O74835|RRP5_SCHPO	38	rRNA biogenesis protein rrp5 OS=Schizosaccharomyces pombe (strain 972 / ATCC 24843) GN=rrp5 PE=1 SV=1	GO:0003723,GO:0005634,GO:0006396	2638	2772	4936	3082	936	558	58.134	66.371	93.73	75.929	14.392	8.635	-2.35864	7.44798	4.44246e-07	7.74186e-06
MSTRG.5825	MSTRG.5825.1	2444	fgr:FG02025.1	90.72	hypothetical protein; K06185 ATP-binding cassette, sub-family F, member 2	YER036c	77.45	[R] KOG0927 Predicted transporter (ABC superfamily)	gi|531862232|gb|EQK99995.1|	100	ATP-binding cassette sub-family F member 2 [Ophiocordyceps sinensis CO18]	sp|P40024|ARB1_YEAST	77.45	ABC transporter ATP-binding protein ARB1 OS=Saccharomyces cerevisiae (strain ATCC 204508 / S288c) GN=ARB1 PE=1 SV=1	GO:0000056,GO:0005524,GO:0005634,GO:0005840,GO:0006144,GO:0006200,GO:0042624	1271.33	3581.59	1729.64	574.76	730.68	646.62	83.696	239.07	102.84	45.077	31.016	24.914	-2.34275	7.3203	2.05219e-05	0.000204974
MSTRG.7213	MSTRG.7213.1	1219	fgr:FG05547.1	64.09	hypothetical protein; K08269 unc51-like kinase [EC:2.7.11.1]	YGL180w	28.78	[OUT] KOG0595 Serine/threonine-protein kinase involved in autophagy	gi|531860743|gb|EQK99135.1|	100	Serine/threonine-protein kinase [Ophiocordyceps sinensis CO18]	sp|Q7RX99|ATG1_NEUCR	62.77	Serine/threonine-protein kinase apg-1 OS=Neurospora crassa (strain ATCC 24698 / 74-OR23-1A / CBS 708.71 / DSM 1257 / FGSC 987) GN=apg-1 PE=3 SV=2	GO:0000166,GO:0004674,GO:0006468,GO:0009069	3220	1728	1327	1080	541	823	390.241	234.981	141.694	149.611	44.785	68.712	-2.33664	7.30353	1.31733e-06	1.97642e-05
MSTRG.4331	MSTRG.4331.1	1930	fgr:FG01016.1	63.52	hypothetical protein; K02934 large subunit ribosomal protein L6e	YLR448w	46.32	[J] KOG1694 60s ribosomal protein L6	gi|531863818|gb|EQL01019.1|	83.94	Ribosomal protein L6E [Ophiocordyceps sinensis CO18]	sp|P05739|RL6B_YEAST	46.32	60S ribosomal protein L6-B OS=Saccharomyces cerevisiae (strain ATCC 204508 / S288c) GN=RPL6B PE=1 SV=4	GO:0003735,GO:0005840,GO:0006412,GO:0042254	13690	11018	4822	1597	3238	3652	1642.52	1412.36	429.322	189.734	275.351	288.179	-2.33338	9.63491	4.59043e-07	7.93604e-06
MSTRG.1866	MSTRG.1866.1	4296	fgr:FG07112.1	70.7	hypothetical protein; K08736 DNA mismatch repair protein MSH3	Hs4505249	39.24	[L] KOG0218 Mismatch repair MSH3	gi|531865953|gb|EQL02801.1|	98.19	DNA mismatch repair protein msh3 [Ophiocordyceps sinensis CO18]	sp|Q2HFD4|MSH3_CHAGB	59.95	DNA mismatch repair protein MSH3 OS=Chaetomium globosum (strain ATCC 6205 / CBS 148.51 / DSM 1962 / NBRC 6347 / NRRL 1970) GN=MSH3 PE=3 SV=1	GO:0005524,GO:0006298,GO:0030983	820.37	1925.92	896.83	2199.05	310.36	473.21	38.816	102.604	31.729	105.172	9.628	15.427	-2.32918	6.49733	6.23989e-06	7.33187e-05
MSTRG.4067	MSTRG.4067.1	832	fgr:FG00305.1	77.55	hypothetical protein; K03687 molecular chaperone GrpE	YOR232w	53.69	[O] KOG3003 Molecular chaperone of the GrpE family	gi|531864081|gb|EQL01214.1|	99.32	GrpE nucleotide exchange factor [Ophiocordyceps sinensis CO18]	sp|Q9P5U4|GRPE_NEUCR	70.13	GrpE protein homolog, mitochondrial OS=Neurospora crassa (strain ATCC 24698 / 74-OR23-1A / CBS 708.71 / DSM 1257 / FGSC 987) GN=grpe PE=3 SV=1	GO:0000774,GO:0005759,GO:0006457,GO:0042803,GO:0050790,GO:0051087	1018	1707	557	383	364	430	216.312	396.355	100.799	90.112	53.857	64.272	-2.29062	6.48404	3.4824e-07	6.27005e-06
MSTRG.9331	rna6305-EQK97980.1	1080	ssl:SS1G_09262	97.59	hypothetical protein ; K02949 small subunit ribosomal protein S11e	SPAC31G5.03	90.36	[J] KOG1728 40S ribosomal protein S11	gi|573982795|ref|XP_006669318.1|	90.43	40S ribosomal protein S11 [Cordyceps militaris CM01]	sp|P79013|RS11_SCHPO	90.36	40S ribosomal protein S11 OS=Schizosaccharomyces pombe (strain 972 / ATCC 24843) GN=rps11a PE=2 SV=2	GO:0003735,GO:0005840,GO:0006412,GO:0042254	4757	4261	716	392	1271	1353	1077.52	1054.86	138.011	98.222	200.388	215.518	-2.27543	8.19404	3.33044e-07	6.02644e-06
MSTRG.1142	rna942-EQL03327.1	972	fgr:FG08686.1	56.67	hypothetical protein	7293898	33.33	[S] KOG4059 Uncharacterized conserved protein	gi|531866527|gb|EQL03327.1|	100	AIG2 family protein [Ophiocordyceps sinensis CO18]	-	-	-	GO:0003839,GO:0006750	902	1239	384	458	241	392	133.96	200.655	48.762	75.542	24.932	40.929	-2.26219	6.13579	1.31687e-06	1.97642e-05
MSTRG.4086	rna3096-EQL01189.1	999	fgr:FG00511.1	57.51	hypothetical protein	-	-	-	gi|531864047|gb|EQL01189.1|	100	Tho complex subunit 7/Mft1p [Ophiocordyceps sinensis CO18]	sp|Q9P7J4|MFT1_SCHPO	27.93	THO complex subunit mft1 OS=Schizosaccharomyces pombe (strain 972 / ATCC 24843) GN=mft1 PE=3 SV=1	GO:0000445,GO:0006397	909	1214	581	443	260	368	130.404	189.894	71.288	70.599	25.986	37.112	-2.26137	6.12297	5.96706e-07	9.98219e-06
MSTRG.4314	rna3262-EQL01031.1	3654	fgr:FG06101.1	66.18	hypothetical protein; K14780 ATP-dependent RNA helicase DHX37/DHR1 [EC:3.6.4.13]	SPAPB1A10.06c	39.58	[AJ] KOG0926 DEAH-box RNA helicase	gi|531863831|gb|EQL01031.1|	100	DEAH-box RNA helicase [Ophiocordyceps sinensis CO18]	sp|Q9HDY4|YK16_SCHPO	39.58	Putative ATP-dependent RNA helicase PB1A10.06c OS=Schizosaccharomyces pombe (strain 972 / ATCC 24843) GN=SPAPB1A10.06c PE=3 SV=1	GO:0003676,GO:0005524,GO:0006200,GO:0008026	565	801	1075	1809	233	175	18.652	28.746	30.56	66.721	5.37	4.063	-2.2522	5.49116	3.65019e-06	4.68996e-05
MSTRG.2335	rna1833-EQL02445.1	1814	fgr:FG00861.1	87.11	hypothetical protein; K00088 IMP dehydrogenase [EC:1.1.1.205]	YML056c	65	[F] KOG2550 IMP dehydrogenase/GMP reductase	gi|531865554|gb|EQL02445.1|	99.74	inosine-5'-monophosphate dehydrogenase IMD2 [Ophiocordyceps sinensis CO18]	sp|Q7SFX7|IMDH_NEUCR	86.84	Inosine-5'-monophosphate dehydrogenase OS=Neurospora crassa (strain ATCC 24698 / 74-OR23-1A / CBS 708.71 / DSM 1257 / FGSC 987) GN=NCU03117 PE=3 SV=1	GO:0003938,GO:0006144,GO:0006177,GO:0030554,GO:0042720,GO:0046872,GO:0055114	1712	2985	1490	1749	690	731	137.799	261.482	102.961	156.885	38.718	41.35	-2.23832	7.27899	2.45267e-06	3.32442e-05
MSTRG.5267	rna3907-EQL00375.1	3246	fgr:FG05081.1	76.27	hypothetical protein; K14554 U3 small nucleolar RNA-associated protein 21	SPCC1672.07	35.66	[R] KOG1539 WD repeat protein	gi|531862958|gb|EQL00375.1|	99.78	WD repeat containing protein 36 [Ophiocordyceps sinensis CO18]	sp|O14053|UTP21_SCHPO	35.66	U3 small nucleolar RNA-associated protein 21 homolog OS=Schizosaccharomyces pombe (strain 972 / ATCC 24843) GN=SPCC1672.07 PE=3 SV=1	GO:0006364,GO:0032040	1010	1226	1924	2234	365	308	39.494	52.123	64.756	97.574	9.951	8.46	-2.23644	6.19926	1.96168e-07	3.76954e-06
MSTRG.10684	MSTRG.10684.1	1400	fgr:FG07067.1	73.91	hypothetical protein	-	-	-	gi|672796669|gb|KFH47213.1|	71.98	Transcriptional regulatory protein-like protein [Acremonium chrysogenum ATCC 11550]	sp|Q9P326|PRO1_NEUCR	66.99	Transcriptional regulatory protein pro1 OS=Neurospora crassa (strain ATCC 24698 / 74-OR23-1A / CBS 708.71 / DSM 1257 / FGSC 987) GN=adv-1 PE=2 SV=1	GO:0000981,GO:0005634,GO:0006357,GO:0008270	277.88	156.5	137.87	5.94	64.27	65.39	26.487	16.241	11.272	0.627	4.266	4.379	-2.22951	3.8222	0.000121496	0.000931551
MSTRG.7154	MSTRG.7154.1	1676	fgr:FG05547.1	76.19	hypothetical protein; K08269 unc51-like kinase [EC:2.7.11.1]	YGL180w	51.79	[OUT] KOG0595 Serine/threonine-protein kinase involved in autophagy	gi|322709329|gb|EFZ00905.1|	79.74	Serine/threonine-protein kinase [Metarhizium anisopliae ARSEF 23]	sp|Q52EB3|ATG1_MAGO7	80.31	Serine/threonine-protein kinase ATG1 OS=Magnaporthe oryzae (strain 70-15 / ATCC MYA-4617 / FGSC 8958) GN=ATG1 PE=1 SV=1	GO:0004674,GO:0005524,GO:0006468,GO:0009069	2651	1018	1279	1090	606	484	229.262	95.831	94.927	105.015	36.535	29.415	-2.22361	6.88313	6.06123e-06	7.14515e-05
MSTRG.4199	MSTRG.4199.1	6244	fgr:FG02800.1	43.07	hypothetical protein; K11701 helicase required for RNAi-mediated heterochromatin assembly 1 [EC:3.6.4.13]	SPCC1739.03	34.04	[L] KOG1807 Helicases	gi|531863937|gb|EQL01109.1|	100	helicase-like protein [Ophiocordyceps sinensis CO18]	sp|O74465|HRR1_SCHPO	34.04	Helicase required for RNAi-mediated heterochromatin assembly 1 OS=Schizosaccharomyces pombe (strain 972 / ATCC 24843) GN=hrr1 PE=1 SV=2	GO:0004386,GO:0008152	3208.31	3629.67	2062.57	911.54	1217	865	62.368	76.667	34.549	19.816	16.782	12.014	-2.21911	7.81166	1.19068e-06	1.8233e-05
MSTRG.348	rna277-EQL04031.1	2876	ncr:NCU07058	47.79	hypothetical protein; K14567 U3 small nucleolar RNA-associated protein 14	YML093w	40.46	[S] KOG2172 Uncharacterized conserved protein	gi|531867265|gb|EQL04031.1|	97.25	Utp14 protein [Ophiocordyceps sinensis CO18]	sp|Q04500|UTP14_YEAST	40.46	U3 small nucleolar RNA-associated protein 14 OS=Saccharomyces cerevisiae (strain ATCC 204508 / S288c) GN=UTP14 PE=1 SV=1	GO:0006364,GO:0032040	752	1286	2475	2836	326	304	33.476	62.244	94.806	140.968	10.126	9.513	-2.207	6.08051	2.15724e-06	2.99213e-05
MSTRG.8641	MSTRG.8641.1	2833	pan:PODANSg5532	85.71	hypothetical protein	-	-	-	gi|531858708|gb|EQK98354.1|	97.69	cyclopropane-fatty-acyl-phospholipid synthase [Ophiocordyceps sinensis CO18]	sp|P0A9H7|CFA_ECOLI	31.17	Cyclopropane-fatty-acyl-phospholipid synthase OS=Escherichia coli (strain K12) GN=cfa PE=1 SV=2	GO:0008610	5660.41	5650.5	401.69	79.48	2237.37	1247.82	404.579	441.806	24.056	7.034	110.818	60.955	-2.19955	8.53715	4.69391e-06	5.74898e-05
MSTRG.498	MSTRG.498.1	4855	fgr:FG02460.1	83.65	hypothetical protein; K14950 cation-transporting ATPase 13A1 [EC:3.6.3.-]	YEL031w	57	[P] KOG0209 P-type ATPase	gi|531867138|gb|EQL03909.1|	99.32	cation-transporting ATPase 4 [Ophiocordyceps sinensis CO18]	sp|P39986|ATC6_YEAST	57	Manganese-transporting ATPase 1 OS=Saccharomyces cerevisiae (strain ATCC 204508 / S288c) GN=SPF1 PE=1 SV=1	GO:0005524,GO:0006200,GO:0016021,GO:0019829,GO:0046872,GO:0098655	2449	3325	5270	5189	937	853	63.023	92.984	116.821	149.235	16.824	15.419	-2.19701	7.577	1.41493e-06	2.09862e-05
MSTRG.9229	MSTRG.9229.1	1548	fgr:FG10304.1	64.15	hypothetical protein; K11129 H/ACA ribonucleoprotein complex subunit 2	YDL208w	62.79	[A] KOG3167 Box H/ACA snoRNP component, involved in ribosomal RNA pseudouridinylation	gi|531857562|gb|EQK98042.1|	100	Ribosomal protein L7Ae/L30e/S12e/Gadd45 [Ophiocordyceps sinensis CO18]	sp|P32495|NHP2_YEAST	62.79	H/ACA ribonucleoprotein complex subunit 2 OS=Saccharomyces cerevisiae (strain ATCC 204508 / S288c) GN=NHP2 PE=1 SV=2	GO:0005840,GO:0042254	2521.31	3549.5	1818.4	1559.09	963.98	928.08	243.85	373.805	150.888	201.408	67.244	63.096	-2.19017	7.6516	1.67332e-06	2.41585e-05
MSTRG.1723	rna1378-EQL02914.1	1317	fgr:FG02783.1	82.63	hypothetical protein; K00559 sterol 24-C-methyltransferase [EC:2.1.1.41]	SPBC16E9.05	53.68	[IR] KOG1269 SAM-dependent methyltransferases	gi|531866074|gb|EQL02914.1|	100	sterol 24-C-methyltransferase [Ophiocordyceps sinensis CO18]	sp|Q9P3R1|ERG6_NEUCR	70.68	Sterol 24-C-methyltransferase erg-4 OS=Neurospora crassa (strain ATCC 24698 / 74-OR23-1A / CBS 708.71 / DSM 1257 / FGSC 987) GN=erg-4 PE=3 SV=1	GO:0003838,GO:0005741,GO:0005811,GO:0006694,GO:0032259	2432	3222	1261	1103	940	841	299.15	431.861	132.825	150.876	80.574	72.714	-2.17338	7.55027	1.62809e-06	2.35996e-05
MSTRG.4917	MSTRG.4917.1	749	fgr:FG07186.1	89.36	hypothetical protein; K02930 large subunit ribosomal protein L4e	YDR012w	56.38	[A] KOG1475 Ribosomal protein RPL1/RPL2/RL4L4	gi|591476855|gb|EXM08007.1|	93.62	50S ribosomal protein L4e [Fusarium oxysporum f. sp. cubense tropical race 4 54006]	sp|P49626|RL4B_YEAST	56.38	60S ribosomal protein L4-B OS=Saccharomyces cerevisiae (strain ATCC 204508 / S288c) GN=RPL4B PE=1 SV=2	GO:0003735,GO:0005840,GO:0006412,GO:0042254,GO:0043227	3136	2633	460	122	758	1043	656.772	602.378	82.059	28.292	110.511	153.598	-2.17053	7.56644	1.51553e-06	2.22053e-05
MSTRG.1167	rna968-EQL03317.1	1874	pan:PODANSg7440	67.74	hypothetical protein	-	-	-	gi|531866516|gb|EQL03317.1|	99.73	Stress-responsive protein Ish1 [Ophiocordyceps sinensis CO18]	sp|Q9Y7X6|ISH1_SCHPO	24.79	Stress response protein ish1 OS=Schizosaccharomyces pombe (strain 972 / ATCC 24843) GN=ish1 PE=1 SV=1	GO:0005524,GO:0005737,GO:0016787,GO:0030163	12718	6965	1592	2295	4108	2042	996.195	593.711	107.071	200.363	224.325	112.397	-2.16274	9.32562	3.53047e-05	0.00032705
MSTRG.1212	rna1000-EQL03299.1	5191	fgr:FG09638.1	87.81	hypothetical protein; K11541 carbamoyl-phosphate synthase / aspartate carbamoyltransferase [EC:6.3.5.5 2.1.3.2]	SPAC22G7.06c	74.58	[R] KOG0370 Multifunctional pyrimidine synthesis protein CAD (includes carbamoyl-phophate synthetase, aspartate transcarbamylase, and glutamine amidotransferase)	gi|531866496|gb|EQL03299.1|	100	aspartate carbamoyltransferase catalytic subunit [Ophiocordyceps sinensis CO18]	sp|O93937|PYR1_EMENI	81.13	Protein pyrABCN OS=Emericella nidulans (strain FGSC A4 / ATCC 38163 / CBS 112.46 / NRRL 194 / M139) GN=pyrABCN PE=3 SV=2	GO:0004070,GO:0005524,GO:0006207,GO:0006522,GO:0006531,GO:0006543,GO:0009347,GO:0016597,GO:0046872,GO:0070409	641	544	813	297	202	171	17.173	15.84	18.759	8.894	3.776	3.221	-2.16097	5.28809	4.39595e-06	5.44827e-05
MSTRG.913	MSTRG.913.1	2065	fgr:FG01717.1	78.88	hypothetical protein; K13076 delta8-fatty-acid desaturase [EC:1.14.19.4]	At2g46210	35.74	[I] KOG4232 Delta 6-fatty acid desaturase/delta-8 sphingolipid desaturase	gi|531866768|gb|EQL03556.1|	100	fatty acid desaturase [Ophiocordyceps sinensis CO18]	sp|Q6CMK7|SLD1_KLULA	49.4	Delta(8)-fatty-acid desaturase OS=Kluyveromyces lactis (strain ATCC 8585 / CBS 2359 / DSM 70799 / NBRC 1267 / NRRL Y-1140 / WM37) GN=SLD PE=3 SV=1	GO:0005506,GO:0006633,GO:0016717,GO:0020037,GO:0055114	1798	2100	1047	2525	867	373	130.076	166.253	64.942	204.136	44.047	19.104	-2.15927	7.01298	1.00138e-05	0.000110373
MSTRG.10566	MSTRG.10566.1	2968	fgr:FG09454.1	82.62	hypothetical protein; K14293 importin subunit beta-1	SPAC1B1.03c	46.17	[YU] KOG1241 Karyopherin (importin) beta 1	gi|302895727|ref|XP_003046744.1|	83.2	predicted protein [Nectria haematococca mpVI 77-13-4]	sp|O13864|IMB1_SCHPO	46.17	Importin subunit beta-1 OS=Schizosaccharomyces pombe (strain 972 / ATCC 24843) GN=kap95 PE=3 SV=1	GO:0000176,GO:0005087,GO:0005643,GO:0005737,GO:0006606,GO:0006612,GO:0006656,GO:0008536,GO:0008565,GO:0032853,GO:0051292,GO:0060188	2871	4452	4127	5990	1214	1125	137.314	231.52	169.796	319.822	40.494	37.805	-2.15767	7.9306	3.8473e-06	4.90259e-05
MSTRG.3946	rna3000-EQL01289.1	1380	pcs:Pc21g21580	55.85	Pc21g21580	-	-	-	gi|531864183|gb|EQL01289.1|	100	Protein kinase-like domain protein [Ophiocordyceps sinensis CO18]	-	-	-	GO:0016301,GO:0016310	1274	1984	608	708	555	490	123.494	209.396	50.543	76.42	37.498	33.382	-2.15175	6.76404	1.04818e-06	1.63272e-05
MSTRG.367	MSTRG.367.1	6978	pan:PODANSg740	54.9	hypothetical protein	Hs7108333_2	23.48	[R] KOG4155 FOG: WD40 repeat	gi|531867224|gb|EQL03991.1|	100	hnwd1 [Ophiocordyceps sinensis CO18]	sp|Q00808|HETE1_PODAS	52.6	Vegetative incompatibility protein HET-E-1 OS=Podospora anserina GN=HET-E1 PE=3 SV=1	GO:0009116,GO:0016740	260.51	268.23	441.38	323.48	71	98	4.494	5.029	6.559	6.239	0.863	1.185	-2.14149	4.1384	8.39733e-05	0.000673337
MSTRG.292	MSTRG.292.1	2320	fgr:FG08773.1	87.29	similar to mannose-1-phosphate guanylyltransferase; K00966 mannose-1-phosphate guanylyltransferase [EC:2.7.7.13]	SPCC1906.01	72.24	[M] KOG1322 GDP-mannose pyrophosphorylase/mannose-1-phosphate guanylyltransferase	gi|629687381|ref|XP_007808986.1|	92.98	Mannose-1-phosphate guanyltransferase [Metarhizium acridum CQMa 102]	sp|O74624|MPG1_HYPJE	92.31	Mannose-1-phosphate guanyltransferase OS=Hypocrea jecorina GN=mpg1 PE=1 SV=1	GO:0004475,GO:0005525,GO:0005737,GO:0006000,GO:0006013,GO:0007049,GO:0009298	1978.42	2220.59	885.1	774.74	770.7	597.82	119.915	146.387	46.109	52.382	32.568	25.458	-2.11962	7.1264	1.42946e-06	2.11728e-05
MSTRG.6897	MSTRG.6897.1	5232	act:ACLA_082710	57.4	abc transporter	SPCC737.09c	42.86	[P] KOG0056 Heavy metal exporter HMT1, ABC superfamily	gi|531861123|gb|EQK99315.1|	100	ABC transporter [Ophiocordyceps sinensis CO18]	sp|Q02592|HMT1_SCHPO	41.09	Heavy metal tolerance protein OS=Schizosaccharomyces pombe (strain 972 / ATCC 24843) GN=hmt1 PE=2 SV=3	GO:0005524,GO:0006200,GO:0016021,GO:0042626,GO:0055085	16927.2	23561	13526	10787.9	6030	7355	698.208	1001.18	430.937	435.508	139.643	147.481	-2.10355	10.4041	1.234e-05	0.000132649
MSTRG.4941	rna3686-EQL00594.1	3725	fgr:FG01217.1	86.35	hypothetical protein; K01955 carbamoyl-phosphate synthase large subunit [EC:6.3.5.5]	SPBC215.08c	66.61	[R] KOG0370 Multifunctional pyrimidine synthesis protein CAD (includes carbamoyl-phophate synthetase, aspartate transcarbamylase, and glutamine amidotransferase)	gi|531863258|gb|EQL00594.1|	95.39	carbamoyl-phosphate synthase arginine-specific large chain [Ophiocordyceps sinensis CO18]	sp|O94313|CARB_SCHPO	66.61	Carbamoyl-phosphate synthase arginine-specific large chain OS=Schizosaccharomyces pombe (strain 972 / ATCC 24843) GN=arg4 PE=3 SV=1	GO:0003824,GO:0005524,GO:0005951,GO:0006807,GO:0046872	3989	4512	4933	2937	1595	1211	138.33	170.053	147.27	113.763	38.577	29.503	-2.1023	8.14695	3.51824e-06	4.54733e-05
MSTRG.4795	MSTRG.4795.1	4367	pan:PODANSg2929	81.47	hypothetical protein; K13126 polyadenylate-binding protein	SPAC57A7.04c	64.71	[AJ] KOG0123 Polyadenylate-binding protein (RRM superfamily)	gi|531863411|gb|EQL00707.1|	96.15	polyadenylate-binding protein [Ophiocordyceps sinensis CO18]	sp|Q2GSX8|PABP_CHAGB	82.72	Polyadenylate-binding protein, cytoplasmic and nuclear OS=Chaetomium globosum (strain ATCC 6205 / CBS 148.51 / DSM 1962 / NBRC 6347 / NRRL 1970) GN=PAB1 PE=3 SV=1	GO:0000166,GO:0003723,GO:0005634,GO:0005737,GO:0006397,GO:0006417,GO:0051028	7300.02	8806.22	10252.4	11136.8	2957.47	2375.02	310.542	399.917	357.645	505.574	87.462	60.56	-2.09968	9.07099	5.52817e-06	6.61735e-05
MSTRG.4553	MSTRG.4553.1	2815	pan:PODANSg8883	52.15	hypothetical protein; K05349 beta-glucosidase [EC:3.2.1.21]	-	-	-	gi|531863626|gb|EQL00879.1|	100	Glycoside hydrolase, family 3 [Ophiocordyceps sinensis CO18]	sp|Q4WR62|BGLM_ASPFU	47.8	Probable beta-glucosidase M OS=Neosartorya fumigata (strain ATCC MYA-4609 / Af293 / CBS 101355 / FGSC A1100) GN=bglM PE=3 SV=1	GO:0000272,GO:0004553	4608.13	2312.09	1369.9	360.71	1339.32	917.93	243.274	133.594	62.122	21.603	49.292	34.619	-2.09668	7.82789	1.74957e-05	0.000180048
MSTRG.8676	MSTRG.8676.1	1833	fgr:FG09535.1	66.44	hypothetical protein	SPBC1711.08	33.55	[S] KOG2936 Uncharacterized conserved protein	gi|531858655|gb|EQK98337.1|	83.39	Activator of Hsp90 ATPase [Ophiocordyceps sinensis CO18]	sp|Q9P782|YNY8_SCHPO	33.55	Uncharacterized protein C1711.08 OS=Schizosaccharomyces pombe (strain 972 / ATCC 24843) GN=SPBC1711.08 PE=2 SV=1	GO:0001671,GO:0006950,GO:0032781,GO:0051087	11460.7	9557.73	9941.92	3225	4260	2701.69	1440.2	1323.59	1061.77	447.642	366.69	232.603	-2.08936	9.44608	1.02121e-05	0.000112106
MSTRG.9967	MSTRG.9967.1	5090	fgr:FG08532.1	82.5	hypothetical protein; K03235 elongation factor 3	YPL226w_2	67.86	[EJ] KOG0062 ATPase component of ABC transporters with duplicated ATPase domains/Translation elongation factor EF-3b	gi|629694293|ref|XP_007812438.1|	85.58	elongation factor 3 [Metarhizium acridum CQMa 102]	sp|Q08972|NEW1_YEAST	50.94	[NU+] prion formation protein 1 OS=Saccharomyces cerevisiae (strain ATCC 204508 / S288c) GN=NEW1 PE=1 SV=1	GO:0003746,GO:0005524,GO:0005634,GO:0005739,GO:0005840,GO:0005844,GO:0006200,GO:0006448,GO:0016887,GO:0042274	2122.01	3997.06	4091.27	11692.6	1025.47	1035	50.626	103.569	84.035	311.67	17.048	17.349	-2.08657	7.69015	1.8915e-05	0.000191746
MSTRG.7259	rna5193-EQK99094.1	1318	act:ACLA_066520	54.43	protein kinase domain protein	At3g44850	47.27	[T] KOG1290 Serine/threonine protein kinase	gi|531860680|gb|EQK99094.1|	100	protein kinase domain protein [Ophiocordyceps sinensis CO18]	sp|P36616|DSK1_SCHPO	44.04	Protein kinase dsk1 OS=Schizosaccharomyces pombe (strain 972 / ATCC 24843) GN=dsk1 PE=3 SV=2	GO:0004672,GO:0005524,GO:0006468	848	678	965	178	240	265	92.604	80.643	90.316	21.634	18.268	20.342	-2.0858	5.66444	4.00216e-06	5.07572e-05
MSTRG.7028	MSTRG.7028.2	5170	fgr:FG06885.1	79.55	hypothetical protein	SPAPYUK71.03c	33.87	[R] KOG1012 Ca2+-dependent lipid-binding protein CLB1/vesicle protein vp115/Granuphilin A, contains C2 domain	gi|629700603|ref|XP_007815593.1|	82.54	membrane bound C2 domain protein (vp115), putative [Metarhizium acridum CQMa 102]	sp|Q9UT00|YKH3_SCHPO	33.87	Uncharacterized protein PYUK71.03c OS=Schizosaccharomyces pombe (strain 972 / ATCC 24843) GN=SPAPYUK71.03c PE=1 SV=1	GO:0004298,GO:0005634,GO:0005737,GO:0005839,GO:0016021,GO:0051603	6470	8707	3566	2385	2646	2452	442.91	734.417	170.881	151.754	113.947	139.346	-2.08108	8.992	7.55106e-06	8.62967e-05
MSTRG.7840	MSTRG.7840.1	3558	fgr:FG08935.1	79.8	hypothetical protein; K00728 dolichyl-phosphate-mannose-protein mannosyltransferase [EC:2.4.1.109]	YDL095w	43.13	[O] KOG3359 Dolichyl-phosphate-mannose:protein O-mannosyl transferase	gi|531859925|gb|EQK98761.1|	99.59	glycosyltransferase family 39 [Ophiocordyceps sinensis CO18]	sp|O74189|PMT1_CANAL	44.71	Dolichyl-phosphate-mannose--protein mannosyltransferase 1 OS=Candida albicans (strain SC5314 / ATCC MYA-2876) GN=PMT1 PE=2 SV=1	GO:0000136,GO:0004169,GO:0035269	5185	4025	3662	2350	1622	1446	235.088	194.559	146.407	124.256	49.118	42.57	-2.0771	8.25617	3.36368e-06	4.37131e-05
MSTRG.218	MSTRG.218.1	2243	fgr:FG06087.1	58.14	hypothetical protein	-	-	-	gi|531867352|gb|EQL04114.1|	100	glycoside hydrolase [Ophiocordyceps sinensis CO18]	-	-	-	GO:0008152,GO:0016787	3657	4203	1016	3061	787	1858	355.918	436.15	84.842	337.694	50.786	113.265	-2.06882	8.04075	5.95939e-05	0.000505083
MSTRG.7101	MSTRG.7101.1	2291	ncr:NCU07347	61.3	hypothetical protein	-	-	-	gi|531860872|gb|EQK99196.1|	100	Glycoside hydrolase, superfamily [Ophiocordyceps sinensis CO18]	sp|Q2U492|BTGC_ASPOR	59.65	Probable glucan endo-1,3-beta-glucosidase btgC OS=Aspergillus oryzae (strain ATCC 42149 / RIB 40) GN=btgC PE=3 SV=1	GO:0004553,GO:0005975	3497.06	3641.21	2770.51	2444.67	1002.65	1410.59	227.095	247.498	158.449	183.411	45.092	58.497	-2.06138	7.90032	5.67834e-06	6.75243e-05
MSTRG.10962	MSTRG.10962.1	1739	fgr:FG09447.1	60.87	hypothetical protein	SPAC1420.04c_1	37.27	[J] KOG2539 Mitochondrial/chloroplast ribosome small subunit component	gi|531851856|gb|EQK97378.1|	100	37S ribosomal protein Rsm22 [Ophiocordyceps sinensis CO18]	sp|Q9UTM2|CO111_SCHPO	37.27	Rsm22-cox11 tandem protein 1, mitochondrial OS=Schizosaccharomyces pombe (strain 972 / ATCC 24843) GN=cox1101 PE=1 SV=2	GO:0005840,GO:0006412,GO:0008168,GO:0032259	850	1112	1214	1005	281	387	104.673	145.032	126.711	137.937	24.003	31.653	-2.0581	6.046	5.43595e-06	6.52134e-05
MSTRG.3337	rna2559-EQL01729.1	1278	fgr:FG10169.1	64.96	hypothetical protein	Hs8922995	28.03	[T] KOG4306 Glycosylphosphatidylinositol-specific phospholipase C	gi|531864710|gb|EQL01729.1|	100	tat pathway signal sequence [Ophiocordyceps sinensis CO18]	sp|Q9NUJ7|PLCX1_HUMAN	28.03	PI-PLC X domain-containing protein 1 OS=Homo sapiens GN=PLCXD1 PE=2 SV=1	GO:0006629,GO:0008081	710	1438	624	537	468	274	75.363	166.253	56.778	63.44	34.626	20.438	-2.05388	6.18922	4.64578e-05	0.000412422
MSTRG.3560	MSTRG.3560.1	2440	fgr:FG05143.1	73.22	hypothetical protein; K01526 guanosine-diphosphatase [EC:3.6.1.42]	SPAC824.08	51.53	[F] KOG1385 Nucleoside phosphatase	gi|531864511|gb|EQL01563.1|	95.25	guanosine diphosphatase [Ophiocordyceps sinensis CO18]	sp|Q8TGG8|GDA1_ASPFU	62.72	Probable guanosine-diphosphatase OS=Neosartorya fumigata (strain ATCC MYA-4609 / Af293 / CBS 101355 / FGSC A1100) GN=gda1 PE=3 SV=2	GO:0004382,GO:0008152,GO:0045134	4507	7050	4187	7125	2008	1974	265.075	439.511	221.675	495.938	82.408	77.461	-2.04832	8.60956	1.59702e-05	0.000165605
MSTRG.4626	MSTRG.4626.1	3633	fgr:FG00843.1	81.52	hypothetical protein; K03021 DNA-directed RNA polymerase III subunit RPC2 [EC:2.7.7.6]	SPAC4G9.08c	61.69	[K] KOG0215 RNA polymerase III, second largest subunit	gi|531863575|gb|EQL00839.1|	99.17	DNA-directed RNA polymerase III polypeptide [Ophiocordyceps sinensis CO18]	sp|Q10233|RPC2_SCHPO	61.69	DNA-directed RNA polymerase III subunit RPC2 OS=Schizosaccharomyces pombe (strain 972 / ATCC 24843) GN=rpc2 PE=2 SV=1	GO:0003677,GO:0003899,GO:0005730,GO:0006144,GO:0006206,GO:0006351,GO:0032549	1596	930	284	101	580	280	55.695	35.292	8.535	3.94	14.118	6.862	-2.04045	6.39008	1.87543e-05	0.000191009
MSTRG.7560	MSTRG.7560.1	4059	fgr:FG00831.1	62.39	hypothetical protein	SPAC2C4.17c	27	[M] KOG4629 Predicted mechanosensitive ion channel	gi|531860294|gb|EQK98920.1|	96.42	Mechanosensitive ion channel family protein [Ophiocordyceps sinensis CO18]	sp|O14050|YEYH_SCHPO	27	Uncharacterized MscS family protein C2C4.17c OS=Schizosaccharomyces pombe (strain 972 / ATCC 24843) GN=SPAC2C4.17c PE=3 SV=1	GO:0005509,GO:0016020,GO:0016301,GO:0016310,GO:0055085	5131	3885	2721	3613	1797	1311	188.165	151.228	86.113	150.614	45.109	32.698	-2.02808	8.23426	7.98529e-06	9.04028e-05
MSTRG.9182	rna6215-EQK98071.1	1497	fgr:FG01353.1	81.08	hypothetical protein; K11483 histone deacetylase HOS2 [EC:3.5.1.98]	SPAC3G9.07c	49.53	[B] KOG1342 Histone deacetylase complex, catalytic component RPD3	gi|531857649|gb|EQK98071.1|	100	histone deacetylase phd1 [Ophiocordyceps sinensis CO18]	sp|O13298|PHD1_SCHPO	49.53	Histone deacetylase phd1 OS=Schizosaccharomyces pombe (strain 972 / ATCC 24843) GN=phd1 PE=1 SV=1	GO:0000118,GO:0006355,GO:0032041,GO:0046969,GO:0046970,GO:0061647,GO:0070932,GO:0070933,GO:0097372	1037	1516	539	416	437	455	91.418	145.471	40.774	40.854	26.85	28.187	-2.02559	6.43488	1.96787e-06	2.7783e-05
MSTRG.10573	rna6797-EQK97489.1	698	mgr:MGG_06700	72.73	MG06700.4; hypothetical protein	SPBC1778.09	60.53	[R] KOG1102 Rab6 GTPase activator GAPCenA and related TBC domain proteins	gi|531853753|gb|EQK97489.1|	100	GTPase activating protein [Ophiocordyceps sinensis CO18]	sp|Q9Y7J5|YOI9_SCHPO	60.53	TBC domain-containing protein C1778.09 OS=Schizosaccharomyces pombe (strain 972 / ATCC 24843) GN=SPBC1778.09 PE=3 SV=1	GO:0005097,GO:0032851	555	781	394	257	234	234	142.756	219.743	86.076	73.003	41.88	42.333	-2.02061	5.50202	2.04296e-05	0.0002045
MSTRG.9693	MSTRG.9693.1	5060	fgr:FG04102.1	78.63	hypothetical protein; K00654 serine palmitoyltransferase [EC:2.3.1.50]	YDR062w	54.63	[O] KOG1357 Serine palmitoyltransferase	gi|531856524|gb|EQK97818.1|	100	serine palmitoyltransferase 2 [Ophiocordyceps sinensis CO18]	sp|Q09925|LCB2_SCHPO	57.93	Serine palmitoyltransferase 2 OS=Schizosaccharomyces pombe (strain 972 / ATCC 24843) GN=lcb2 PE=3 SV=1	GO:0004758,GO:0006687,GO:0030148,GO:0030170,GO:0035339,GO:0042967	2867	3359	2476.8	4410	1028.51	1144.87	128.496	162.264	93.368	225.896	31.78	33.356	-2.01999	7.71475	5.58409e-06	6.66225e-05
MSTRG.448	MSTRG.448.1	2281	act:ACLA_041030	70.48	40S ribosomal protein S0; K02998 small subunit ribosomal protein SAe	SPBC685.06	77.18	[J] KOG0830 40S ribosomal protein SA (P40)/Laminin receptor 1	gi|531867147|gb|EQL03917.1|	91.3	Ribosomal protein S2, eukaryotic/archaeal [Ophiocordyceps sinensis CO18]	sp|A1CL63|RSSA_ASPCL	70.48	40S ribosomal protein S0 OS=Aspergillus clavatus (strain ATCC 1007 / CBS 513.65 / DSM 816 / NCTC 3887 / NRRL 1) GN=rps0 PE=3 SV=1	GO:0000028,GO:0003735,GO:0006412,GO:0022627	9685.82	9598.5	4995.25	5837.75	2733.41	3979.5	1099.82	1076.64	302.602	459.023	134.389	197.194	-2.01809	9.34075	1.63566e-05	0.000169289
MSTRG.1168	rna969-EQL03318.1	2330	bfu:BC1G_03375	68.57	hypothetical protein ; K14824 ribosome biogenesis protein ERB1	YMR049c	47.73	[J] KOG0650 WD40 repeat nucleolar protein Bop1, involved in ribosome biogenesis	gi|531866517|gb|EQL03318.1|	100	eukaryotic ribosome biogenesis protein 1 [Ophiocordyceps sinensis CO18]	sp|A6RRD4|ERB1_BOTFB	68.57	Ribosome biogenesis protein erb1 OS=Botryotinia fuckeliana (strain B05.10) GN=erb1 PE=3 SV=1	GO:0000463,GO:0000466,GO:0005654,GO:0030687,GO:0043021,GO:0070545	987	1585	1926	1627	436	469	54.408	95.016	91.29	100.082	16.757	18.165	-2.01786	6.4497	3.74852e-06	4.78798e-05
MSTRG.6951	rna4991-EQK99294.1	917	fgr:FG07069.1	81.43	hypothetical protein; K04564 superoxide dismutase, Fe-Mn family [EC:1.15.1.1]	SPBC16A3.14	27.94	[P] KOG0876 Manganese superoxide dismutase	gi|531861075|gb|EQK99294.1|	100	superoxide dismutase [Ophiocordyceps sinensis CO18]	sp|O42919|RT26A_SCHPO	27.94	Putative 37S ribosomal protein S26A, mitochondrial OS=Schizosaccharomyces pombe (strain 972 / ATCC 24843) GN=SPBC16A3.14 PE=3 SV=3	GO:0004784,GO:0005840,GO:0019430,GO:0046872,GO:0055114	1541	1480	422	874	517	539	268.835	281.762	62.845	169.113	62.812	66.106	-2.01281	6.66781	7.77913e-07	1.26057e-05
MSTRG.9030	rna6142-EQK98144.1	4020	fgr:FG05016.1	54.05	hypothetical protein; K10908 DNA-directed RNA polymerase, mitochondrial [EC:2.7.7.6]	YFL036w	36.98	[KL] KOG1038 Mitochondrial/chloroplast DNA-directed RNA polymerase RPO41, provides primers for DNA replication-initiation	gi|531857935|gb|EQK98144.1|	98.21	DNA-directed RNA polymerase [Ophiocordyceps sinensis CO18]	sp|P38671|RPOM_NEUCR	44.23	DNA-directed RNA polymerase, mitochondrial OS=Neurospora crassa (strain ATCC 24698 / 74-OR23-1A / CBS 708.71 / DSM 1257 / FGSC 987) GN=cyt-5 PE=3 SV=2	GO:0003677,GO:0003899,GO:0005730,GO:0006144,GO:0006206,GO:0006351	1006	1222	1772	1895	426	361	30.608	40.409	46.424	64.412	9.038	7.714	-2.0056	6.23735	1.96122e-06	2.77298e-05
MSTRG.1930	rna1526-EQL02749.1	1602	pan:PODANSg2997	59.07	hypothetical protein; K11121 NAD-dependent histone deacetylase SIR2 [EC:3.5.1.-]	YOL068c	45.4	[BK] KOG2684 Sirtuin 5 and related class III sirtuins (SIR2 family)	gi|531865895|gb|EQL02749.1|	95.75	NAD-dependent histone deacetylase [Ophiocordyceps sinensis CO18]	sp|C8V3W5|HST1_EMENI	51.82	NAD-dependent protein deacetylase hst1 OS=Emericella nidulans (strain FGSC A4 / ATCC 38163 / CBS 112.46 / NRRL 194 / M139) GN=AN10449 PE=3 SV=1	GO:0000118,GO:0006342,GO:0008270,GO:0016575,GO:0017136,GO:0070403	809	813	865	311	306	265	69.221	75.727	63.523	29.65	18.251	15.936	-2.00468	5.77478	6.75484e-06	7.85196e-05
MSTRG.7068	MSTRG.7068.1	5470	ncr:NCU02815	79.03	similar to histidine kinase	At5g35750	31.36	[T] KOG0519 Sensory transduction histidine kinase	gi|594721431|gb|EXV04318.1|	86.7	histidine kinase [Metarhizium robertsii]	sp|Q5A599|NIK1_CANAL	57.72	Histidine protein kinase NIK1 OS=Candida albicans (strain SC5314 / ATCC MYA-2876) GN=NIK1 PE=1 SV=2	GO:0000155,GO:0000160,GO:0009365,GO:0016021,GO:0023014	4439.09	3957.04	5032.17	2629.32	1658.93	1294.14	102.291	99.079	99.899	67.725	26.667	20.947	-2.00353	8.14118	7.15897e-06	8.25983e-05
MSTRG.3070	MSTRG.3070.1	1982	fgr:FG09292.1	52.65	hypothetical protein	YGL251c	22.99	[A] KOG0952 DNA/RNA helicase MER3/SLH1, DEAD-box superfamily	gi|531864975|gb|EQL01946.1|	100	meiotic helicase [Ophiocordyceps sinensis CO18]	sp|P51979|HFM1_YEAST	22.99	ATP-dependent DNA helicase MER3 OS=Saccharomyces cerevisiae (strain ATCC 204508 / S288c) GN=HFM1 PE=1 SV=3	GO:0004386,GO:0043170,GO:0044238	110.15	200.97	212.86	268.74	860.95	919.47	10.884	22.312	19.826	31.877	56.089	57.137	2.00224	5.41709	7.16454e-05	0.000591075
MSTRG.2296	rna1799-EQL02479.1	1241	ncr:NCU07318	71.28	mannitol-1-phosphate 5-dehydrogenase; K00009 mannitol-1-phosphate 5-dehydrogenase [EC:1.1.1.17]	-	-	-	gi|531865591|gb|EQL02479.1|	100	mannitol-1-phosphate 5-dehydrogenase [Ophiocordyceps sinensis CO18]	sp|Q7SA44|MTLD_NEUCR	71.28	Mannitol-1-phosphate 5-dehydrogenase OS=Neurospora crassa (strain ATCC 24698 / 74-OR23-1A / CBS 708.71 / DSM 1257 / FGSC 987) GN=NCU07318 PE=3 SV=1	GO:0006000,GO:0006013,GO:0008926,GO:0019594,GO:0050662,GO:0055114	1380	1320	1116	558	8856	6851	161.385	168.172	111.793	72.585	721.702	563.115	2.04204	8.54146	6.34722e-06	7.44188e-05
MSTRG.8309	MSTRG.8309.1	2862	fgr:FG05293.1	59.93	hypothetical protein; K14713 solute carrier family 39 (zinc transporter), member 7	SPAP8A3.03	25.31	[P] KOG2693 Putative zinc transporter	gi|531859239|gb|EQK98524.1|	100	GPI-anchored cell wall beta-1,3-endoglucanase EglC [Ophiocordyceps sinensis CO18]	sp|Q0C7P6|EGLC_ASPTN	51.35	Probable glucan endo-1,3-beta-glucosidase eglC OS=Aspergillus terreus (strain NIH 2624 / FGSC A1156) GN=eglC PE=3 SV=1	GO:0004553,GO:0005975	7561.59	9120.38	46446.4	37781.5	57748.3	39850.3	638.629	843.253	3616.87	3851.48	3704.32	2410.28	2.04281	11.1753	1.99601e-05	0.000200383
MSTRG.1650	rna1330-EQL02939.1	1643	bmy:Bm1_31570	33.74	Cam kinase protein 1; K08794 calcium/calmodulin-dependent protein kinase I [EC:2.7.11.17]	CE25046	35.06	[T] KOG0032 Ca2+/calmodulin-dependent protein kinase, EF-Hand protein superfamily	gi|531866102|gb|EQL02939.1|	99.62	Protein kinase-like domain protein [Ophiocordyceps sinensis CO18]	sp|Q9TXJ0|CMK1_CAEEL	35.06	Calcium/calmodulin-dependent protein kinase type 1 OS=Caenorhabditis elegans GN=cmk-1 PE=1 SV=1	GO:0004674,GO:0005524,GO:0006468,GO:0009069	103	132	746	1515	800	579	8.456	11.789	52.547	138.533	45.765	33.391	2.04541	5.0406	5.12659e-05	0.000446347
MSTRG.3295	MSTRG.3295.1	2311	fgr:FG09984.1	64.93	hypothetical protein; K01663 glutamine amidotransferase / cyclase [EC:2.4.2.- 4.1.3.-]	SPBC887.20c	48.85	[E] KOG0623 Glutamine amidotransferase/cyclase	gi|531864743|gb|EQL01756.1|	100	imidazole glycerol phosphate synthase hisHF [Ophiocordyceps sinensis CO18]	sp|Q9P4P9|HIS5_EMENI	63.48	Imidazole glycerol phosphate synthase hisHF OS=Emericella nidulans (strain FGSC A4 / ATCC 38163 / CBS 112.46 / NRRL 194 / M139) GN=hisHF PE=3 SV=2	GO:0000105,GO:0005737,GO:0016763	117	63	132	55	579	469	13.729	8.052	13.582	7.912	47.333	38.718	2.05758	4.646	0.00012811	0.000976062
MSTRG.1323	rna1095-EQL03197.1	1679	fgr:FG04085.1	69.65	hypothetical protein; K00849 galactokinase [EC:2.7.1.6]	YBR020w	43.79	[G] KOG0631 Galactokinase	gi|531866387|gb|EQL03197.1|	99.37	galactokinase [Ophiocordyceps sinensis CO18]	sp|P09608|GAL1_KLULA	43.63	Galactokinase OS=Kluyveromyces lactis (strain ATCC 8585 / CBS 2359 / DSM 70799 / NBRC 1267 / NRRL Y-1140 / WM37) GN=GAL1 PE=2 SV=2	GO:0000411,GO:0004335,GO:0005524,GO:0005737,GO:0033499,GO:0046835	177	82	259	94	699	822	14.587	7.349	18.323	8.633	40.154	47.607	2.07656	5.17749	7.00515e-05	0.000581015
MSTRG.3912	MSTRG.3912.1	3475	act:ACLA_060130	43.8	benzoate 4-monooxygenase cytochrome P450	Hs22043571	22.97	[Q] KOG0159 Cytochrome P450 CYP11/CYP12/CYP24/CYP27 subfamilies	gi|531864224|gb|EQL01322.1|	88.17	cytochrome P450 [Ophiocordyceps sinensis CO18]	sp|Q00278|AFLD_ASPPA	42.57	Norsolorinic acid ketoreductase OS=Aspergillus parasiticus GN=nor-1 PE=1 SV=1	GO:0004497,GO:0005506,GO:0016705,GO:0020037,GO:0055114	1793	1802	6225	9697	10110	11477	177.417	152.394	389.068	503.337	800.292	880.218	2.08849	8.99316	4.06324e-06	5.13557e-05
MSTRG.10334	MSTRG.10334.1	2078	fgr:FG05446.1	76.84	hypothetical protein; K01480 agmatinase [EC:3.5.3.11]	SPBC8E4.03	54.7	[E] KOG2964 Arginase family protein	gi|531854652|gb|EQK97576.1|	100	Ureohydrolase [Ophiocordyceps sinensis CO18]	sp|O42887|SPEB2_SCHPO	54.7	Putative agmatinase 2 OS=Schizosaccharomyces pombe (strain 972 / ATCC 24843) GN=SPBC8E4.03 PE=3 SV=1	GO:0006807,GO:0016813,GO:0046872	472	383	327	406	2581	2585	47.25	42.88	25.439	43.969	182.137	176.361	2.10274	6.92892	4.27428e-07	7.4969e-06
MSTRG.7292	rna5213-EQK99070.1	801	ang:ANI_1_1502124	50.62	An14g05450; alpha-galactosidase A	-	-	-	gi|531860633|gb|EQK99070.1|	100	alpha-galactosidase A [Ophiocordyceps sinensis CO18]	-	-	-	GO:0005524,GO:0008152,GO:0016772	97.75	78.65	105.7	75.7	445.67	627.72	18.686	16.417	17.228	16.032	59.318	84.368	2.10965	4.67437	5.37763e-05	0.00046374
MSTRG.6290	rna4563-EQK99722.1	618	pan:PODANSg297	70.76	hypothetical protein	SPAC1002.07c	40.83	[E] KOG3216 Diamine acetyltransferase	gi|531861779|gb|EQK99722.1|	89.27	acetyltransferase [Ophiocordyceps sinensis CO18]	sp|P79081|ATS1_SCHPO	40.83	N-acetyltransferase ats1 OS=Schizosaccharomyces pombe (strain 972 / ATCC 24843) GN=ats1 PE=2 SV=1	GO:0008080,GO:0042967	165	118	82	39	849	887	53.731	42.115	22.581	13.973	192.205	203.206	2.12755	5.35693	6.1082e-06	7.1927e-05
MSTRG.6889	MSTRG.6889.1	1105	ang:ANI_1_228014	70.7	An01g01830; catalase-peroxidase; K03782 catalase/peroxidase [EC:1.11.1.6 1.11.1.7]	-	-	-	gi|596656089|ref|XP_007274155.1|	75.12	bifunctional catalase-peroxidase cat2 [Colletotrichum gloeosporioides Nara gc5]	sp|Q0CD12|KATG_ASPTN	71.36	Catalase-peroxidase OS=Aspergillus terreus (strain NIH 2624 / FGSC A1156) GN=katG PE=3 SV=1	GO:0004096,GO:0006568,GO:0006804,GO:0015947,GO:0020037,GO:0042744,GO:0046872,GO:0055114	668	483	1930	1042	2923	4129	84.542	66.621	209.113	146.622	257.764	367.307	2.12817	7.37428	2.77193e-06	3.69262e-05
MSTRG.8846	rna6041-EQK98244.1	903	fgr:FG08619.1	70.82	hypothetical protein; K03137 transcription initiation factor TFIIE subunit beta	YKR062w	33.94	[K] KOG3095 Transcription initiation factor IIE, beta subunit	gi|531858342|gb|EQK98244.1|	100	Transcription factor TFIIE beta subunit, DNA-binding domain protein [Ophiocordyceps sinensis CO18]	sp|P36145|T2EB_YEAST	33.94	Transcription initiation factor IIE subunit beta OS=Saccharomyces cerevisiae (strain ATCC 204508 / S288c) GN=TFA2 PE=1 SV=3	GO:0003677,GO:0003743,GO:0005673,GO:0005840,GO:0006367,GO:0006446	210	224	580	1014	1405	1293	34.278	39.883	80.862	183.651	159.711	148.35	2.13532	5.98793	8.35315e-07	1.33959e-05
MSTRG.4397	MSTRG.4397.1	3074	mgr:MGG_03619	79.97	MG03619.4; hypothetical protein	SPAC17A2.05	48.89	[C] KOG2404 Fumarate reductase, flavoprotein subunit	gi|531863772|gb|EQL00985.1|	97.07	flavocytochrome c [Ophiocordyceps sinensis CO18]	sp|O13755|OSM1_SCHPO	48.89	Fumarate reductase OS=Schizosaccharomyces pombe (strain 972 / ATCC 24843) GN=osm1 PE=3 SV=1	GO:0000104,GO:0006118,GO:0006119,GO:0018874,GO:0019643,GO:0020037,GO:0045281	1766	1248	10992	13010	9056	9585	90.515	63.373	497.576	772.01	320.643	297.946	2.14102	8.77134	2.94192e-06	3.88569e-05
MSTRG.6865	MSTRG.6865.2	2477	fgr:FG08801.1	59.09	hypothetical protein	-	-	-	gi|531861185|gb|EQK99350.1|	100	WW domain binding protein 11 [Ophiocordyceps sinensis CO18]	-	-	-	GO:0001522,GO:0006396,GO:0031429,GO:0042254	123.21	124.11	237.12	149.36	515.07	1021.59	8.174	6.973	15.373	13.566	24.6	61.604	2.14209	5.18323	4.96646e-05	0.000435548
MSTRG.6647	MSTRG.6647.1	2766	ure:UREG_00417	66.43	NAD-dependent aldehyde dehydrogenase	SPAC1002.12c	44.48	[C] KOG2451 Aldehyde dehydrogenase	gi|531861404|gb|EQK99473.1|	100	Aldehyde dehydrogenase domain protein [Ophiocordyceps sinensis CO18]	sp|Q8BWF0|SSDH_MOUSE	47.77	Succinate-semialdehyde dehydrogenase, mitochondrial OS=Mus musculus GN=Aldh5a1 PE=1 SV=1	GO:0016620,GO:0055114	120	152	89	110	1171	543	14.407	19.49	8.173	11.58	99.065	40.569	2.14618	5.33104	4.84296e-05	0.000426786
MSTRG.6373	MSTRG.6373.3	3889	fgr:FG01557.1	37.1	hypothetical protein	-	-	-	gi|531861695|gb|EQK99666.1|	100	Histidine phosphatase superfamily, clade-2 [Ophiocordyceps sinensis CO18]	-	-	-	GO:0003993,GO:0006771,GO:0016311,GO:0019497	300	260	773	396	992	2548	16.236	14.762	36.507	20.871	38.693	99.233	2.17084	6.37733	1.38132e-05	0.000145743
MSTRG.8932	MSTRG.8932.1	2289	afv:AFLA_031570	59.01	pyruvate decarboxylase PdcA, putative; K01568 pyruvate decarboxylase [EC:4.1.1.1]	SPAC3G9.11c	43.15	[EH] KOG1184 Thiamine pyrophosphate-requiring enzyme	gi|589106083|ref|XP_006965064.1|	71.72	pyruvate decarboxylase [Trichoderma reesei QM6a]	sp|Q2UKV4|PDC_ASPOR	59.01	Pyruvate decarboxylase OS=Aspergillus oryzae (strain ATCC 42149 / RIB 40) GN=pdcA PE=3 SV=1	GO:0000287,GO:0008152,GO:0016831,GO:0030976	414	325	376	163	2393	2286	28.745	24.155	22.08	11.915	120.288	115.521	2.17084	6.77353	1.51935e-07	3.02671e-06
MSTRG.2504	MSTRG.2504.1	2554	mgr:MGG_06011	86.85	MG06011.4; similar to glutathione-dependent formaldehyde dehydrogenase; K00121 S-(hydroxymethyl)glutathione dehydrogenase / alcohol dehydrogenase [EC:1.1.1.284 1.1.1.1]	SPCC13B11.04c	72.64	[Q] KOG0022 Alcohol dehydrogenase, class III	gi|531865433|gb|EQL02335.1|	100	glutathione-dependent formaldehyde dehydrogenase [Ophiocordyceps sinensis CO18]	sp|P0CL53|FADH_ASPOR	77.83	S-(hydroxymethyl)glutathione dehydrogenase OS=Aspergillus oryzae (strain ATCC 42149 / RIB 40) GN=FDH1 PE=3 SV=1	GO:0006069,GO:0008270,GO:0051903	876	346	1258	414	4794	2917	77.554	27.817	58.42	24.885	181.174	110.413	2.18223	7.4884	3.14193e-05	0.000296884
MSTRG.6232	MSTRG.6232.1	10307	fgr:FG09406.1	66.06	hypothetical protein; K03128 transcription initiation factor TFIID subunit 2	SPAC3A12.05c	32.85	[K] KOG1932 TATA binding protein associated factor	gi|531861840|gb|EQK99760.1|	100	hypothetical protein OCS_04528 [Ophiocordyceps sinensis CO18]	sp|P87121|TAF2_SCHPO	32.85	Transcription initiation factor TFIID subunit 2 OS=Schizosaccharomyces pombe (strain 972 / ATCC 24843) GN=taf2 PE=3 SV=3	GO:0003743,GO:0005634,GO:0005840,GO:0006355,GO:0006446	5927	4941	17038	27838	43935	25664	696.797	522.023	1872.48	4040.78	4283.23	1798.45	2.18324	10.6603	7.94064e-06	8.99912e-05
MSTRG.4539	MSTRG.4539.1	1365	ncr:NCU10107	74.48	similar to ribose 5-phosphate isomerase; K01808 ribose 5-phosphate isomerase B [EC:5.3.1.6]	-	-	-	gi|531863641|gb|EQL00889.1|	100	ribose 5-phosphate isomerase [Ophiocordyceps sinensis CO18]	sp|P0CL19|RPIB_COCIM	62.86	Putative ribose 5-phosphate isomerase OS=Coccidioides immitis (strain RS) GN=CIMG_07932 PE=1 SV=1	GO:0004751,GO:0006098,GO:0015976	88.9	97.6	300.37	225.49	627.68	588.92	12.352	10.435	25.29	24.655	98.152	89.343	2.20012	4.83463	1.27092e-05	0.000135995
MSTRG.193	rna161-EQL04138.1	2003	fgr:FG04314.1	65.45	hypothetical protein; K03544 ATP-dependent Clp protease ATP-binding subunit ClpX	YBR227c	35.89	[O] KOG0745 Putative ATP-dependent Clp-type protease (AAA+ ATPase superfamily)	gi|531867377|gb|EQL04138.1|	95.65	Clp protease, ATP-binding subunit ClpX [Ophiocordyceps sinensis CO18]	sp|P38323|MCX1_YEAST	35.89	Mitochondrial clpX-like chaperone MCX1 OS=Saccharomyces cerevisiae (strain ATCC 204508 / S288c) GN=MCX1 PE=1 SV=1	GO:0005524,GO:0006457,GO:0006508,GO:0008233,GO:0051082	408	128	200	84	1718	1700	32.358	11.049	13.619	7.42	94.99	94.749	2.20461	6.31575	2.19785e-05	0.000217918
MSTRG.6643	rna4809-EQK99483.1	964	fgr:FG00654.1	76.13	hypothetical protein	At3g20970	47.6	[O] KOG2358 NifU-like domain-containing proteins	gi|531861415|gb|EQK99483.1|	99.62	NifU-like protein [Ophiocordyceps sinensis CO18]	sp|Q9UUB8|YH9J_SCHPO	48.02	NifU-like protein C1709.19c OS=Schizosaccharomyces pombe (strain 972 / ATCC 24843) GN=SPBC1709.19c PE=3 SV=1	GO:0005506,GO:0005737,GO:0016226,GO:0051536	287	116	178	69	1476	1154	46.437	20.481	24.604	12.395	166.351	131.273	2.23046	5.93313	9.02297e-06	0.000100888
MSTRG.11142	MSTRG.11142.1	517	ncr:NCU04039	54.05	hypothetical protein	-	-	-	gi|531850645|gb|EQK97337.1|	100	Acyl-CoA N-acyltransferase [Ophiocordyceps sinensis CO18]	-	-	-	GO:0008080,GO:0042967	116	87	303	318	609	745	48.628	38.541	105.791	148.242	190.072	237.93	2.24748	4.98038	8.07333e-06	9.12093e-05
MSTRG.2756	rna2122-EQL02155.1	2418	cim:CIMG_03124	50.92	hypothetical protein	-	-	-	gi|531865229|gb|EQL02155.1|	96.52	serine/threonine-protein kinase Sgk2 [Ophiocordyceps sinensis CO18]	-	-	-	GO:0004672,GO:0005524,GO:0006468	90	65	70	40	501	545	4.765	3.737	3.182	2.362	18.483	20.254	2.2642	4.60782	1.34178e-05	0.000142542
MSTRG.5229	MSTRG.5229.1	1434	pan:PODANSg3118	77.71	hypothetical protein; K00606 3-methyl-2-oxobutanoate hydroxymethyltransferase [EC:2.1.2.11]	At3g61530	48.17	[H] KOG2949 Ketopantoate hydroxymethyltransferase	gi|531863004|gb|EQL00410.1|	95.01	Ketopantoate hydroxymethyltransferase [Ophiocordyceps sinensis CO18]	sp|Q9Y7B6|PANB_EMENI	63.61	3-methyl-2-oxobutanoate hydroxymethyltransferase OS=Emericella nidulans (strain FGSC A4 / ATCC 38163 / CBS 112.46 / NRRL 194 / M139) GN=panB PE=3 SV=1	GO:0003864,GO:0008168,GO:0015940,GO:0032259	231	212	721	2345	1390	1617	23.202	24.168	66.547	286.921	102.626	125.191	2.26767	6.12158	1.23052e-07	2.50182e-06
MSTRG.4367	rna3292-EQL00994.1	1025	fgr:FG09034.1	76.21	hypothetical protein	YIL003w	47.78	[D] KOG3022 Predicted ATPase, nucleotide-binding	gi|531863784|gb|EQL00994.1|	100	cytosolic Fe-S cluster assembling factor cfd1 [Ophiocordyceps sinensis CO18]	sp|Q4I174|CFD1_GIBZE	79.27	Cytosolic Fe-S cluster assembly factor CFD1 OS=Gibberella zeae (strain PH-1 / ATCC MYA-4620 / FGSC 9075 / NRRL 31084) GN=CFD1 PE=3 SV=2	GO:0002098,GO:0005524,GO:0005737,GO:0016226,GO:0046872,GO:0051539	159	71	328	277	812	768	23.71	11.538	41.813	45.861	84.342	80.498	2.30215	5.19069	1.24174e-05	0.000133349
MSTRG.796	rna655-EQL03652.1	1743	fgr:FG10934.1	66.67	hypothetical protein; K01466 allantoinase [EC:3.5.2.5]	YIR027c	40.9	[F] KOG2584 Dihydroorotase and related enzymes	gi|531866869|gb|EQL03652.1|	100	allantoinase [Ophiocordyceps sinensis CO18]	sp|P32375|ALN_YEAST	40.9	Allantoinase OS=Saccharomyces cerevisiae (strain ATCC 204508 / S288c) GN=DAL1 PE=3 SV=2	GO:0000256,GO:0000737,GO:0004038,GO:0006144,GO:0008270,GO:0016888,GO:0050897	266	145	261	265	1568	1283	30.01	17.884	25.049	33.35	123.043	101.813	2.31121	6.03559	6.40805e-07	1.05733e-05
MSTRG.1653	MSTRG.1653.1	1873	mgr:MGG_02902	41.12	MG02902.4; hypothetical protein	-	-	-	gi|531866111|gb|EQL02948.1|	91.81	Protein kinase-like domain protein [Ophiocordyceps sinensis CO18]	-	-	-	GO:0005524,GO:0016301,GO:0016310,GO:0016773,GO:0046677	468	484	1747	7084	3934	2755	35.508	39.92	113.556	598.476	206.787	146.639	2.31147	7.26195	2.52788e-07	4.68347e-06
MSTRG.7403	MSTRG.7403.1	1456	fgr:FG07261.1	54.79	hypothetical protein	At5g45920	26.1	[I] KOG3035 Isoamyl acetate-hydrolyzing esterase	gi|531860507|gb|EQK99013.1|	94.08	GDSL Lipase/Acylhydrolase family protein [Ophiocordyceps sinensis CO18]	sp|Q9DB29|IAH1_MOUSE	27.52	Isoamyl acetate-hydrolyzing esterase 1 homolog OS=Mus musculus GN=Iah1 PE=1 SV=1	GO:0008152,GO:0016787	67	35	76	16	408	302	8.016	4.64	8.025	2.31	30.261	22.342	2.31372	4.04523	5.80383e-05	0.000494985
MSTRG.5298	MSTRG.5298.1	3389	cpw:CPC735_068350	45.42	hypothetical protein	-	-	-	gi|531862934|gb|EQL00355.1|	100	serine/threonine-protein kinase Sgk2 [Ophiocordyceps sinensis CO18]	-	-	-	GO:0004672,GO:0006468	46.37	85.49	134.32	107.23	356.33	575.53	6.91	10.121	12.877	10.096	34.436	49.292	2.31783	4.43659	7.5361e-05	0.000616111
MSTRG.8275	MSTRG.8275.2	1798	fgr:FG01485.1	63.21	hypothetical protein; K01792 glucose-6-phosphate 1-epimerase [EC:5.1.3.15]	YMR099c	36.46	[G] KOG1594 Uncharacterized enzymes related to aldose 1-epimerase	gi|531859277|gb|EQK98543.1|	89.2	Aldose 1-epimerase family protein [Ophiocordyceps sinensis CO18]	sp|Q03161|YMY9_YEAST	36.46	Glucose-6-phosphate 1-epimerase OS=Saccharomyces cerevisiae (strain ATCC 204508 / S288c) GN=YMR099C PE=1 SV=1	GO:0005975,GO:0016853,GO:0030246	305.77	295.82	80.22	50.2	2138.99	2120.89	26.115	30.389	5.928	5.508	159.413	157.301	2.32549	6.61196	1.6514e-08	4.28929e-07
MSTRG.4788	MSTRG.4788.1	623	fgr:FG01262.1	69.39	hypothetical protein	-	-	-	gi|531863421|gb|EQL00715.1|	100	Molybdenum cofactor synthesis protein 2A [Ophiocordyceps sinensis CO18]	sp|Q0V5W8|MOC2A_PHANO	57.61	Molybdopterin synthase sulfur carrier subunit OS=Phaeosphaeria nodorum (strain SN15 / ATCC MYA-4574 / FGSC 10173) GN=cnxG PE=3 SV=2	GO:0000166,GO:0003735,GO:0005829,GO:0005840,GO:0006412,GO:0006777,GO:0019008,GO:0030366,GO:0042254	63	86	127	46	414	651	49.271	72.541	76.14	30.393	218.175	352.74	2.33221	4.62443	2.23833e-05	0.000221124
MSTRG.2634	rna2037-EQL02254.1	1755	pno:SNOG_02086	27.34	hypothetical protein	-	-	-	gi|531865339|gb|EQL02254.1|	100	HET-s/LopB domain protein [Ophiocordyceps sinensis CO18]	-	-	-	GO:0004672,GO:0005524,GO:0006468	112	83	191	131	707	683	8.231	6.635	12.051	10.734	36.22	35.269	2.34224	5.00081	2.64791e-06	3.5668e-05
MSTRG.3396	MSTRG.3396.1	2293	ssl:SS1G_02686	37.67	hypothetical protein	-	-	-	gi|531864645|gb|EQL01672.1|	100	Protein kinase-like domain protein [Ophiocordyceps sinensis CO18]	-	-	-	GO:0004672,GO:0005524,GO:0006468,GO:0046677	259.69	129.73	152.13	28	1384.47	1379.63	26.363	12.278	13.35	3.543	68.589	82.323	2.34543	5.9865	6.12625e-07	1.01701e-05
MSTRG.856	MSTRG.856.1	1710	pcs:Pc22g15840	46.3	Pc22g15840	7296535	35.77	[T] KOG1290 Serine/threonine protein kinase	gi|531866804|gb|EQL03590.1|	94.64	protein kinase [Ophiocordyceps sinensis CO18]	sp|Q9UPE1|SRPK3_HUMAN	36.44	SRSF protein kinase 3 OS=Homo sapiens GN=SRPK3 PE=1 SV=2	GO:0004672,GO:0005524,GO:0006468	72	47	93	89	373	476	6.436	4.653	7.162	9.093	23.223	30.144	2.34727	4.29726	1.74449e-05	0.000179696
MSTRG.4245	MSTRG.4245.1	2150	fgr:FG00718.1	67.48	hypothetical protein	At1g79440	37.92	[C] KOG2451 Aldehyde dehydrogenase	gi|531863903|gb|EQL01082.1|	100	aldehyde dehydrogenase [Ophiocordyceps sinensis CO18]	sp|O05619|VDH_PSEUH	45.78	Vanillin dehydrogenase OS=Pseudomonas sp. (strain HR199 / DSM 7063) GN=vdh PE=1 SV=1	GO:0018485,GO:0018916,GO:0050608,GO:0055114	236	197	560	328	1692	1445	19.984	18.374	42.222	32.671	103.771	90.572	2.36256	6.16489	3.12834e-08	7.63245e-07
MSTRG.3765	rna2877-EQL01410.1	2389	fgr:FG06550.1	58.39	hypothetical protein	-	-	-	gi|531864331|gb|EQL01410.1|	99.69	glycosyltransferase family 2 [Ophiocordyceps sinensis CO18]	-	-	-	GO:0008152,GO:0016740	33	61	154	117	343	356	3.003	6.007	11.977	11.831	21.646	22.667	2.37915	4.01487	5.29885e-05	0.000457674
MSTRG.7751	rna5474-EQK98813.1	1299	fgr:FG09289.1	64.52	hypothetical protein	-	-	-	gi|531860061|gb|EQK98813.1|	97.97	glycoside hydrolase family 16 protein [Ophiocordyceps sinensis CO18]	sp|Q8J0P4|CRF1_ASPFU	43.82	Probable glycosidase crf1 OS=Neosartorya fumigata (strain ATCC MYA-4609 / Af293 / CBS 101355 / FGSC A1100) GN=crf1 PE=1 SV=2	GO:0004553,GO:0005975	127	42	397	2474	435	793	21.858	7.889	58.327	472.234	52.131	95.943	2.39308	4.81866	0.000113822	0.000880177
MSTRG.9859	rna6530-EQK97756.1	1562	fgr:FG03865.1	54.3	hypothetical protein	-	-	-	gi|531856170|gb|EQK97756.1|	91.52	NHL repeat-containing protein [Ophiocordyceps sinensis CO18]	-	-	-	GO:0005975,GO:0016901,GO:0048038,GO:0055114	42	32	48	40	198	354	4.256	3.599	4.193	4.452	13.993	24.098	2.40795	3.67805	8.49663e-05	0.000680294
MSTRG.5030	rna3737-EQL00553.1	1308	afv:AFLA_053520	38.28	O-methyltransferase, putative	-	-	-	gi|531863193|gb|EQL00553.1|	94.48	O-methyltransferase-like protein [Ophiocordyceps sinensis CO18]	sp|Q9P900|OMTB_ASPFL	23.82	Demethylsterigmatocystin 6-O-methyltransferase OS=Aspergillus flavus GN=omtB PE=3 SV=1	GO:0008171,GO:0032259	44	65	170	130	405	426	4.844	7.801	16.05	15.938	31.091	32.978	2.42085	4.25445	1.18326e-05	0.000127701
MSTRG.1545	MSTRG.1545.1	648	mgr:MGG_00459	45.5	MG00459.4; hypothetical protein	-	-	-	gi|531866205|gb|EQL03033.1|	100	hypothetical protein OCS_01257 [Ophiocordyceps sinensis CO18]	-	-	-	GO:0005737,GO:0006629,GO:0016021,GO:0016627,GO:0055114	173	60	781	220	943	801	66.308	25.196	242.197	91.585	243.099	207.146	2.43123	5.31089	1.16114e-05	0.000125562
MSTRG.2798	MSTRG.2798.1	4398	fgr:FG04995.1	72.78	hypothetical protein	SPBC839.06	46.18	[P] KOG0202 Ca2+ transporting ATPase	gi|531865190|gb|EQL02121.1|	99.53	calcium-transporting ATPase 3 [Ophiocordyceps sinensis CO18]	sp|P22189|ATC3_SCHPO	46.18	Calcium-transporting ATPase 3 OS=Schizosaccharomyces pombe (strain 972 / ATCC 24843) GN=cta3 PE=1 SV=1	GO:0005524,GO:0005849,GO:0008440,GO:0016021,GO:0016310,GO:0019829,GO:0031124,GO:0046872,GO:0098655	426	335	3242.48	6533.81	3757.39	2030.57	13.492	10.51	86.558	234.675	80.599	42.236	2.43225	7.0327	1.43465e-07	2.87911e-06
MSTRG.4157	rna3147-EQL01135.1	1855	fgr:FG06563.1	50.37	hypothetical protein	SPBC947.05c	25.38	[PQ] KOG0039 Ferric reductase, NADH/NADPH oxidase and related proteins	gi|531863971|gb|EQL01135.1|	88.22	Flavoprotein transmembrane component [Ophiocordyceps sinensis CO18]	sp|O94727|FRP2_SCHPO	25.38	Ferric/cupric reductase transmembrane component 2 OS=Schizosaccharomyces pombe (strain 972 / ATCC 24843) GN=frp2 PE=3 SV=1	GO:0016021,GO:0016491,GO:0055114	102	70	203	92	545	760	12.002	8.98	20.457	12.04	44.686	62.859	2.43611	4.89766	3.05132e-06	4.01554e-05
MSTRG.10759	MSTRG.10759.1	2195	fgr:FG10893.1	64.44	hypothetical protein; K00830 alanine-glyoxylate transaminase / serine-glyoxylate transaminase / serine-pyruvate transaminase [EC:2.6.1.44 2.6.1.45 2.6.1.51]	YFL030w	40.05	[R] KOG2862 Alanine-glyoxylate aminotransferase AGT1	gi|531852887|gb|EQK97431.1|	77.72	alanine--glyoxylate aminotransferase [Ophiocordyceps sinensis CO18]	sp|P43567|AGX1_YEAST	40.05	Alanine--glyoxylate aminotransferase 1 OS=Saccharomyces cerevisiae (strain ATCC 204508 / S288c) GN=AGX1 PE=1 SV=1	GO:0008152,GO:0008483,GO:0030170	1016	545	620	249	4499	7338	65.45	38.189	34.317	17.893	213.568	332.144	2.44501	8.06752	1.04499e-06	1.6301e-05
MSTRG.5356	rna3988-EQL00297.1	852	ncr:NCU09041	74.82	L-xylulose reductase	SPAC8E11.10	41.16	[R] KOG0725 Reductases with broad range of substrate specificities	gi|531862858|gb|EQL00297.1|	93.64	short chain dehydrogenase [Ophiocordyceps sinensis CO18]	sp|Q8NK50|DCXR_HYPJE	77.74	L-xylulose reductase OS=Hypocrea jecorina GN=lxr1 PE=2 SV=1	GO:0016491,GO:0055114	99	58	62	35	433	780	18.923	12.103	10.103	7.41	57.633	104.832	2.46762	4.78961	1.18025e-05	0.000127502
MSTRG.4508	MSTRG.4508.1	3209	fgr:FG06501.1	50.17	hypothetical protein	Hs4503145	27.5	[O] KOG1339 Aspartyl protease	gi|531863668|gb|EQL00909.1|	84.18	aspartic proteinase [Ophiocordyceps sinensis CO18]	sp|P11838|CARP_CRYPA	45.52	Endothiapepsin OS=Cryphonectria parasitica GN=EAPA PE=1 SV=2	GO:0004190,GO:0006508	92.08	95.96	334.99	206.23	383.78	1090.06	6.774	7.926	20.475	16.419	20.575	51.144	2.47586	5.0695	3.19522e-05	0.000299832
MSTRG.9209	rna6236-EQK98051.1	1464	aor:AOR_1_2522154	51.44	AO090003001432; lipase 2 precursor	-	-	-	gi|531857597|gb|EQK98051.1|	100	Secretory lipase family protein [Ophiocordyceps sinensis CO18]	sp|Q9P8W0|LIP5_CANAL	38.03	Lipase 5 OS=Candida albicans (strain SC5314 / ATCC MYA-2876) GN=LIP5 PE=3 SV=2	GO:0004806,GO:0016042,GO:0046486	102	149	103	249	1024	1005	9.224	14.674	7.997	25.094	64.572	63.894	2.50575	5.51778	2.49846e-07	4.64482e-06
MSTRG.9107	rna6176-EQK98109.1	828	fgr:FG01571.1	54.4	hypothetical protein	-	-	-	gi|531857775|gb|EQK98109.1|	100	hormone-sensitive lipase [Ophiocordyceps sinensis CO18]	-	-	-	GO:0008152,GO:0016787	52	49	195	162	288	539	9.506	9.783	30.421	32.838	36.676	69.3	2.53818	4.23298	1.18563e-05	0.00012783
MSTRG.8476	MSTRG.8476.2	6650	fgr:FG01433.1	89.11	similar to T49818 glutamate synthase (NADH2) (EC 1.4.1.14) B24H17.40 precursor [similarity] - Neurospora crassa; K00264 glutamate synthase (NADPH/NADH) [EC:1.4.1.13 1.4.1.14]	SPAPB1E7.07	69.17	[E] KOG0399 Glutamate synthase	gi|531858976|gb|EQK98430.1|	98.26	glutamate synthase [Ophiocordyceps sinensis CO18]	sp|Q9C102|GLT1_SCHPO	69.17	Putative glutamate synthase [NADPH] OS=Schizosaccharomyces pombe (strain 972 / ATCC 24843) GN=glt1 PE=2 SV=1	GO:0005506,GO:0005739,GO:0006118,GO:0006537,GO:0010181,GO:0016040,GO:0019676,GO:0050660,GO:0051536,GO:0055114	1120	573	3897	4437	6994	6759	37.066	21.233	103.935	153.415	158.998	169.657	2.54271	8.26616	1.5259e-07	3.02864e-06
MSTRG.1529	rna1241-EQL03046.1	1347	fgr:FG05087.1	77.46	hypothetical protein; K00626 acetyl-CoA C-acetyltransferase [EC:2.3.1.9]	Hs4557237	47.37	[I] KOG1390 Acetyl-CoA acetyltransferase	gi|531866219|gb|EQL03046.1|	95.31	acetyl-CoA acetyltransferase [Ophiocordyceps sinensis CO18]	sp|Q6AZA0|THIL_DANRE	49.32	Acetyl-CoA acetyltransferase, mitochondrial OS=Danio rerio GN=acat1 PE=2 SV=1	GO:0008152,GO:0016747	450	277	557	252	3015	2928	47.499	31.843	50.404	29.609	221.81	217.229	2.54633	7.05673	1.05926e-08	2.92632e-07
MSTRG.914	MSTRG.914.1	2213	aor:AOR_1_150134	62.82	AO090102000087; extracellular salicylate hydroxylase/monooxygenase	-	-	-	gi|531866769|gb|EQL03557.1|	93.19	extracellular salicylate hydroxylase/monooxygenase [Ophiocordyceps sinensis CO18]	-	-	-	GO:0004497,GO:0055114	84.03	56.75	296.31	204.55	637.39	528.02	5.702	4.151	17.497	14.517	33.606	27.143	2.55601	4.71476	1.30256e-06	1.96143e-05
MSTRG.3852	rna2937-EQL01352.1	1962	fgr:FG03915.1	60.47	hypothetical protein	At1g04610	28.7	[Q] KOG1399 Flavin-containing monooxygenase	gi|531864261|gb|EQL01352.1|	97.24	flavin-containing monooxygenase [Ophiocordyceps sinensis CO18]	sp|O23024|YUC3_ARATH	28.7	Probable indole-3-pyruvate monooxygenase YUCCA3 OS=Arabidopsis thaliana GN=YUC3 PE=2 SV=1	GO:0004497,GO:0055114	685	263.91	1654.5	119	5363.43	2423.55	45.805	19.201	95.066	8.873	250.079	113.888	2.5601	7.43986	6.42054e-06	7.51161e-05
MSTRG.8807	MSTRG.8807.1	679	fgr:FG03256.1	71.11	hypothetical protein	SPBC8E4.04	42.25	[R] KOG1577 Aldo/keto reductase family proteins	gi|517324680|emb|CCT74826.1|	72.22	related to 2,5-diketo-D-gluconic acid reductase [Fusarium fujikuroi IMI 58289]	sp|Q4DJ07|PGFS_TRYCC	43.02	Prostaglandin F synthase OS=Trypanosoma cruzi (strain CL Brener) GN=Tc00.1047053511287.49 PE=1 SV=2	GO:0016491,GO:0055114	139	43	61	23	684	808.92	86.157	29.46	31.423	15.458	293.843	353.284	2.56713	5.06988	1.47748e-05	0.000154836
MSTRG.9257	MSTRG.9257.1	2239	fgr:FG02485.1	69.31	hypothetical protein	-	-	-	gi|531857486|gb|EQK98025.1|	100	Protein kinase-like domain protein [Ophiocordyceps sinensis CO18]	sp|Q70FG7|DODA_BETVU	43.62	4,5-DOPA dioxygenase extradiol OS=Beta vulgaris GN=DODA PE=1 SV=1	GO:0004672,GO:0005524,GO:0006468	243.68	213.31	482.67	270.15	1715.02	2102.02	18.234	17.37	30.95	22.533	99.887	110.527	2.56858	6.41764	8.41235e-10	3.04443e-08
MSTRG.3072	rna2351-EQL01926.1	750	fgr:FG04719.1	58.92	hypothetical protein	SPAC513.07	33.88	[V] KOG1502 Flavonol reductase/cinnamoyl-CoA reductase	gi|531864952|gb|EQL01926.1|	100	NAD(P)-binding domain protein [Ophiocordyceps sinensis CO18]	sp|Q9UT59|YKJ7_SCHPO	33.88	Putative uncharacterized oxidoreductase C513.07 OS=Schizosaccharomyces pombe (strain 972 / ATCC 24843) GN=SPAC513.07 PE=3 SV=1	GO:0003824,GO:0008152,GO:0016021,GO:0050662,GO:0055085	31	29	73	61	177	332	6.481	6.622	12.998	14.12	25.762	48.801	2.58777	3.53757	4.63449e-05	0.000411757
MSTRG.1654	MSTRG.1654.1	594	mgr:MGG_02903	58.33	MG02903.4; hypothetical protein	SPAC8E11.04c	30.66	[I] KOG2112 Lysophospholipase	gi|530479643|gb|EQB58791.1|	61.65	hypothetical protein CGLO_00905 [Colletotrichum gloeosporioides Cg-14]	sp|O42881|APTH1_SCHPO	30.66	Acyl-protein thioesterase 1 OS=Schizosaccharomyces pombe (strain 972 / ATCC 24843) GN=SPAC8E11.04c PE=3 SV=1	GO:0008152,GO:0016787	119	102	224	447	983	929	34.865	32.721	55.618	144.354	200.289	191.446	2.61776	5.41618	3.31415e-08	8.02932e-07
MSTRG.1806	MSTRG.1806.1	1619	ure:UREG_01280	67.83	2-oxoisovalerate dehydrogenase alpha subunit; K00166 2-oxoisovalerate dehydrogenase E1 component, alpha subunit [EC:1.2.4.4]	CE16618	51.45	[C] KOG1182 Branched chain alpha-keto acid dehydrogenase complex, alpha subunit	gi|320593484|gb|EFX05893.1|	71.37	2-oxoisovalerate dehydrogenase complex alpha [Grosmannia clavigera kw1407]	sp|Q54M22|ODBA_DICDI	51	2-oxoisovalerate dehydrogenase subunit alpha, mitochondrial OS=Dictyostelium discoideum GN=bkdA PE=3 SV=1	GO:0003863,GO:0006550,GO:0006552,GO:0006574,GO:0017086,GO:0055114	120	123	114	26	830	1278	12.194	13.595	9.927	2.947	58.662	91.213	2.61959	5.55864	7.78473e-08	1.66049e-06
MSTRG.8532	MSTRG.8532.1	2297	fgr:FG04335.1	58.07	hypothetical protein	-	-	-	gi|531858899|gb|EQK98411.1|	90.72	Pyridine nucleotide-disulfide oxidoreductase, NAD-binding domain protein [Ophiocordyceps sinensis CO18]	-	-	-	GO:0016491,GO:0050660,GO:0055114	72	58	72	117	657	474	5.374	4.54	4.769	9.291	36.303	25.756	2.62507	4.66209	8.30719e-07	1.33419e-05
MSTRG.3688	MSTRG.3688.1	2176	pan:PODANSg2201	43.75	hypothetical protein	SPCC18B5.11c	38.68	[D] KOG0615 Serine/threonine protein kinase Chk2 and related proteins	gi|531864391|gb|EQL01463.1|	100	Protein kinase-like domain protein [Ophiocordyceps sinensis CO18]	sp|Q09170|CDS1_SCHPO	38.68	Serine/threonine-protein kinase cds1 OS=Schizosaccharomyces pombe (strain 972 / ATCC 24843) GN=cds1 PE=1 SV=2	GO:0004674,GO:0005524,GO:0006468,GO:0009069	253	78	130	50	1357	1479	15.931	5.042	6.643	3.407	56.397	62.095	2.63083	5.981	1.399e-06	2.08067e-05
MSTRG.10382	MSTRG.10382.1	873	fgr:FG07058.1	64.8	hypothetical protein; K00452 3-hydroxyanthranilate 3,4-dioxygenase [EC:1.13.11.6]	YJR025c	48.47	[E] KOG3995 3-hydroxyanthranilate oxygenase HAAO	gi|358378047|gb|EHK15730.1|	64.8	hypothetical protein TRIVIDRAFT_86998 [Trichoderma virens Gv29-8]	sp|Q7SDX3|3HAO_NEUCR	62.24	3-hydroxyanthranilate 3,4-dioxygenase OS=Neurospora crassa (strain ATCC 24698 / 74-OR23-1A / CBS 708.71 / DSM 1257 / FGSC 987) GN=bna1 PE=3 SV=1	GO:0005506,GO:0009072,GO:0009435,GO:0051213	69	112	196	166	477	1122	15.648	28.256	37.203	43.917	76.723	185.777	2.63529	5.16245	7.45346e-06	8.55415e-05
MSTRG.7121	MSTRG.7121.1	2872	ncr:NCU09646	71.2	3-ketoacyl-CoA thiolase	Hs4501853	38.61	[I] KOG1389 3-oxoacyl CoA thiolase	gi|531860847|gb|EQK99184.1|	88.13	acetyl-CoA acetyltransferase [Ophiocordyceps sinensis CO18]	sp|P33291|THIKB_CANTR	41	3-ketoacyl-CoA thiolase B, peroxisomal OS=Candida tropicalis PE=3 SV=1	GO:0008152,GO:0016747	115	193	682.5	2046.69	1063.01	1686.4	22.355	36.296	190.16	961.535	166.376	288.784	2.64759	5.93624	1.13557e-07	2.33293e-06
MSTRG.3819	MSTRG.3819.1	2005	pan:PODANSg8568	30.14	hypothetical protein	-	-	-	gi|531864285|gb|EQL01371.1|	100	Chloroperoxidase [Ophiocordyceps sinensis CO18]	sp|Q00668|STCC_EMENI	29.28	Putative sterigmatocystin biosynthesis peroxidase stcC OS=Emericella nidulans (strain FGSC A4 / ATCC 38163 / CBS 112.46 / NRRL 194 / M139) GN=stcC PE=3 SV=2	GO:0004601,GO:0006804,GO:0006979,GO:0055114	83.22	139	194.26	398.28	816.7	1194.8	5.306	9.619	10.91	28.313	36.386	53.32	2.66926	5.48482	2.81028e-07	5.16263e-06
MSTRG.10495	MSTRG.10495.1	1616	pno:SNOG_06627	63.31	hypothetical protein	-	-	-	gi|531854078|gb|EQK97517.1|	65.84	fungal specific transcription factor domain-containing protein [Ophiocordyceps sinensis CO18]	sp|Q9UTA7|YL8B_SCHPO	23.17	Uncharacterized transcriptional regulatory protein C25B8.11 OS=Schizosaccharomyces pombe (strain 972 / ATCC 24843) GN=SPAC25B8.11 PE=3 SV=1	GO:0000981,GO:0003677,GO:0005634,GO:0006357,GO:0008270	34	56	639	644	369	477	4.042	7.099	63.652	84.76	31.639	38.937	2.72115	4.23875	2.49576e-06	3.37021e-05
MSTRG.5756	MSTRG.5756.1	3755	afv:AFLA_077740	73.65	acyl-CoA dehydrogenase	Hs4557233	27.52	[I] KOG0139 Short-chain acyl-CoA dehydrogenase	gi|531862306|gb|EQL00043.1|	100	acyl-CoA dehydrogenase [Ophiocordyceps sinensis CO18]	sp|Q07417|ACADS_MOUSE	27.85	Short-chain specific acyl-CoA dehydrogenase, mitochondrial OS=Mus musculus GN=Acads PE=1 SV=2	GO:0003995,GO:0006118,GO:0050660,GO:0055114	304	137	255	83	2283	1796	18.821	8.98	10.131	4.348	122.545	88.712	2.73098	6.48835	8.20403e-09	2.30754e-07
MSTRG.8660	MSTRG.8660.1	4210	afv:AFLA_061140	44.27	cytochrome P450, putative	CE01658	27.72	[Q] KOG0158 Cytochrome P450 CYP3/CYP5/CYP6/CYP9 subfamilies	gi|531858685|gb|EQK98345.1|	87.66	Cytochrome P450 [Ophiocordyceps sinensis CO18]	sp|Q12608|STCB_EMENI	30.42	Probable sterigmatocystin biosynthesis P450 monooxygenase STCB OS=Emericella nidulans (strain FGSC A4 / ATCC 38163 / CBS 112.46 / NRRL 194 / M139) GN=stcB PE=3 SV=2	GO:0004497,GO:0005506,GO:0016705,GO:0020037,GO:0055114	2259	1993	6605.94	15275	10812.8	28909.8	84.52	70.133	216.554	666.702	416.521	897.084	2.73444	9.77444	9.70981e-07	1.53004e-05
MSTRG.6374	rna4624-EQK99667.1	1084	fgr:FG01555.1	60.43	hypothetical protein	-	-	-	gi|531861696|gb|EQK99667.1|	94.93	ribonuclease Z [Ophiocordyceps sinensis CO18]	-	-	-	GO:0003700,GO:0005667,GO:0006355,GO:0043565,GO:0045449	69	175	778	2207	1083	1277	9.506	26.275	91.68	337.788	103.929	123.638	2.75174	5.70178	7.09839e-07	1.16065e-05
MSTRG.2864	MSTRG.2864.1	3492	fgr:FG05044.1	56.02	hypothetical protein	-	-	-	gi|531865153|gb|EQL02089.1|	100	actin depolymerizing protein [Ophiocordyceps sinensis CO18]	-	-	-	GO:0016307,GO:0046854	1723.72	416.56	6924.2	2103.37	14432.6	5545.07	184.982	39.444	823.994	242.356	1613.8	607.747	2.75526	8.7704	4.49855e-05	0.000401651
MSTRG.715	MSTRG.715.1	1129	fgr:FG00278.1	85.38	hypothetical protein; K01012 biotin synthetase [EC:2.8.1.6]	YGR286c	59.77	[H] KOG2900 Biotin synthase	gi|531866951|gb|EQL03730.1|	100	Biotin synthase [Ophiocordyceps sinensis CO18]	sp|P32451|BIOB_YEAST	59.77	Biotin synthase, mitochondrial OS=Saccharomyces cerevisiae (strain ATCC 204508 / S288c) GN=BIO2 PE=1 SV=2	GO:0004076,GO:0009102,GO:0046872,GO:0051537,GO:0051539	101	66	133	73	614	970	15.355	10.849	16.505	12.594	66.091	104.402	2.76001	5.13031	1.7727e-07	3.44297e-06
MSTRG.10884	MSTRG.10884.1	1404	fgr:FG01564.1	62.62	hypothetical protein	-	-	-	gi|632919682|gb|KDB19071.1|	74.72	transcription factor [Villosiclava virens]	sp|G2TRN9|YAOB_SCHPO	24.86	Uncharacterized transcriptional regulatory protein C11D3.11c OS=Schizosaccharomyces pombe (strain 972 / ATCC 24843) GN=SPAC11D3.11c PE=1 SV=1	GO:0000981,GO:0003677,GO:0005634,GO:0006357,GO:0008270	44	63	148	13	316	716	4.177	6.522	12.061	1.38	20.924	47.8	2.76453	4.5192	6.47855e-06	7.56319e-05
MSTRG.10746	MSTRG.10746.1	2054	fgr:FG00177.1	85.12	hypothetical protein	At3g51680	34.62	[R] KOG0725 Reductases with broad range of substrate specificities	gi|531852959|gb|EQK97436.1|	99.54	short-chain dehydrogenase/reductase family protein [Ophiocordyceps sinensis CO18]	sp|Q9LBG2|LVR_LEIAQ	36.82	Levodione reductase OS=Leifsonia aquatica GN=lvr PE=1 SV=1	GO:0016491,GO:0055114	520	213	632	263	3142	3831	50.66	18.173	44.513	21.352	210.854	241.984	2.77702	7.25676	5.24361e-08	1.17867e-06
MSTRG.8083	MSTRG.8083.1	1373	fgr:FG06918.1	40.34	hypothetical protein	-	-	-	gi|531859561|gb|EQK98643.1|	91.32	long chain fatty alcohol oxidase [Ophiocordyceps sinensis CO18]	-	-	-	GO:0016491	9.8	18.92	137.79	35.15	142.76	144.33	0.96	2.007	11.523	3.815	9.702	9.89	2.78769	2.70604	6.31577e-05	0.000531553
MSTRG.3563	rna2727-EQL01566.1	853	fgr:FG05140.1	78.79	hypothetical protein; K00249 acyl-CoA dehydrogenase [EC:1.3.99.3]	At3g06810	63.04	[R] KOG1469 Predicted acyl-CoA dehydrogenase	gi|666408315|gb|KEY73295.1|	85.21	hypothetical protein S7711_01414 [Stachybotrys chartarum IBT 7711]	sp|Q5ZHT1|ACD11_CHICK	51.56	Acyl-CoA dehydrogenase family member 11 OS=Gallus gallus GN=ACAD11 PE=2 SV=1	GO:0003995,GO:0006118,GO:0050660,GO:0055114	194	127	398	345	1749	1375	38.636	27.629	67.568	76.117	242.534	192.561	2.7942	6.09676	8.16742e-10	2.98565e-08
MSTRG.3489	MSTRG.3489.1	2359	fgr:FG04458.1	54.23	similar to flavohemoglobin; K05916 nitric oxide dioxygenase [EC:1.14.12.17]	YGR234w	34.22	[C] KOG3378 Globins and related hemoproteins	gi|531864577|gb|EQL01616.1|	100	flavohemoglobin [Ophiocordyceps sinensis CO18]	sp|Q7TTP0|HMP_BORPE	45.45	Flavohemoprotein OS=Bordetella pertussis (strain Tohama I / ATCC BAA-589 / NCTC 13251) GN=hmp PE=3 SV=1	GO:0005506,GO:0015671,GO:0016491,GO:0019825,GO:0020037,GO:0055114	3557	762	17832	21251	17589	23871	255.795	59.836	1169.86	1820.08	944.234	1147.09	2.80529	9.82367	1.55025e-05	0.000161679
MSTRG.8430	rna5827-EQK98457.1	734	fgr:FG01018.1	70.37	hypothetical protein; K00851 gluconokinase [EC:2.7.1.12]	SPAC4G9.12	45.11	[G] KOG3354 Gluconate kinase	gi|531859050|gb|EQK98457.1|	100	glucokinase [Ophiocordyceps sinensis CO18]	sp|Q10242|GNTK_SCHPO	45.11	Probable gluconokinase OS=Schizosaccharomyces pombe (strain 972 / ATCC 24843) GN=SPAC4G9.12 PE=3 SV=1	GO:0005975,GO:0016301,GO:0016310	101	54	217	57	727	821	24.489	14.31	44.717	15.269	122.653	139.978	2.83737	5.08591	6.98557e-08	1.5108e-06
MSTRG.2908	MSTRG.2908.1	2858	ncr:NCU07240	64.4	similar to aldo-keto reductase AKR7; K00540 [EC:1.-.-.-]	SPCC965.06	25.9	[C] KOG1575 Voltage-gated shaker-like K+ channel, subunit beta/KCNAB	gi|531865118|gb|EQL02061.1|	87.94	aldo/keto reductase [Ophiocordyceps sinensis CO18]	sp|Q8CG45|ARK72_RAT	36.29	Aflatoxin B1 aldehyde reductase member 2 OS=Rattus norvegicus GN=Akr7a2 PE=1 SV=2	GO:0016491,GO:0055114	330	80.64	189.75	90.2	2328.69	1839.55	30.439	6.823	13.545	9.866	161.537	122.436	2.87757	6.50149	6.26185e-07	1.03635e-05
MSTRG.3492	MSTRG.3492.1	1452	mgr:MGG_00296	59.75	MG00296.4; hypothetical protein	-	-	-	gi|594717525|gb|EXV00423.1|	70.67	glycoside hydrolase family 92 protein [Metarhizium robertsii]	sp|O86365|Y584_MYCTU	22.05	Uncharacterized glycosidase Rv0584 OS=Mycobacterium tuberculosis (strain ATCC 25618 / H37Rv) GN=Rv0584 PE=3 SV=1	GO:0005975,GO:0016787,GO:0030246	154	40	209	250	1458	539	14.068	3.976	16.375	25.428	92.824	34.593	2.89251	5.43851	2.10288e-05	0.000209458
MSTRG.10754	MSTRG.10754.1	2167	fgr:FG00486.1	65.6	hypothetical protein	7296188	47.87	[R] KOG3009 Predicted carbohydrate kinase, contains PfkB domain	gi|589098303|ref|XP_006961174.1|	68	hypothetical protein TRIREDRAFT_54283 [Trichoderma reesei QM6a]	sp|B8II14|PSUG_METNO	48.63	Pseudouridine-5'-phosphate glycosidase OS=Methylobacterium nodulans (strain ORS2060 / LMG 21967) GN=psuG PE=3 SV=1	GO:0008152,GO:0016798	449	294	1543	730	5371	2492	30.428	21.647	89.323	54.88	252.593	117.355	2.9132	7.40797	1.75861e-08	4.546e-07
MSTRG.5655	MSTRG.5655.1	3501	fgr:FG07162.1	61.94	hypothetical protein	YCL064c	36.33	[E] KOG1250 Threonine/serine dehydratases	gi|531862393|gb|EQL00094.1|	94.15	serine family amino acid catabolism- protein [Ophiocordyceps sinensis CO18]	sp|B5VKE8|SDHL_YEAS6	40.13	L-serine dehydratase OS=Saccharomyces cerevisiae (strain AWRI1631) GN=SDL1 PE=3 SV=1	GO:0006520,GO:0030170	75.88	150.7	181.98	82.87	936.54	1527.09	6.029	11.438	11.949	7.274	46.761	80.296	2.92571	5.74426	6.63092e-08	1.44272e-06
MSTRG.7774	rna5486-EQK98798.1	1440	fgr:FG02657.1	70.47	hypothetical protein; K00463 indoleamine 2,3-dioxygenase [EC:1.13.11.52]	-	-	-	gi|531860031|gb|EQK98798.1|	100	Indoleamine 2,3-dioxygenase subfamily [Ophiocordyceps sinensis CO18]	sp|P47125|I23O_YEAST	42.6	Indoleamine 2,3-dioxygenase OS=Saccharomyces cerevisiae (strain ATCC 204508 / S288c) GN=BNA2 PE=1 SV=1	GO:0005737,GO:0020037,GO:0034354,GO:0051213,GO:0055114	56	50	155	221	424	719	5.16	5.017	12.265	22.7	27.256	46.598	2.93622	4.64293	1.80014e-07	3.48379e-06
MSTRG.1069	MSTRG.1069.1	2198	ncr:NCU04500	55.84	similar to chitinase 4; K01183 chitinase [EC:3.2.1.14]	YLR286c	44.24	[M] KOG4701 Chitinase	gi|531866617|gb|EQL03413.1|	99.56	chitinase [Ophiocordyceps sinensis CO18]	sp|Q12713|CHI33_TRIHA	59.82	Endochitinase 33 OS=Trichoderma harzianum GN=chit33 PE=1 SV=1	GO:0004553,GO:0005975	158	126	160	147	1199	1881	10.658	9.745	10.845	13.294	56.405	101.699	2.94879	6.06177	3.46453e-10	1.35891e-08
MSTRG.3377	MSTRG.3377.2	3437	fgr:FG01751.1	34.34	hypothetical protein	-	-	-	gi|531864673|gb|EQL01696.1|	99.61	serine/threonine-protein kinase Sgk2 [Ophiocordyceps sinensis CO18]	-	-	-	GO:0004672,GO:0005524,GO:0006468	25	14	27	9	222	210.67	3.782	2.232	4.203	1.819	25.721	24.519	2.98076	3.25808	3.23755e-06	4.23495e-05
MSTRG.5352	MSTRG.5352.1	1956	fgr:FG09364.1	74.11	hypothetical protein	CE12214	28.74	[Q] KOG0023 Alcohol dehydrogenase, class V	gi|531862854|gb|EQL00293.1|	100	alcohol dehydrogenase [Ophiocordyceps sinensis CO18]	sp|P12311|ADH1_GEOSE	35.82	Alcohol dehydrogenase OS=Geobacillus stearothermophilus GN=adhT PE=1 SV=2	GO:0008270,GO:0016491,GO:0016747,GO:0055114	118	100	194	68	395	2035	9.134	9.281	16.746	8.351	25.862	130.465	2.99161	5.72156	1.27667e-05	0.000136426
MSTRG.3458	rna2651-EQL01639.1	4143	ssl:SS1G_06184	47.97	hypothetical protein	SPCC663.03	30.2	[Q] KOG0055 Multidrug/pheromone exporter, ABC superfamily	gi|531864607|gb|EQL01639.1|	97.68	multidrug resistance protein 1 [Ophiocordyceps sinensis CO18]	sp|P36619|PMD1_SCHPO	30.2	Leptomycin B resistance protein pmd1 OS=Schizosaccharomyces pombe (strain 972 / ATCC 24843) GN=pmd1 PE=3 SV=2	GO:0005524,GO:0006200,GO:0016021,GO:0042626,GO:0055085	18	22	153	137	196	258	0.531	0.715	3.906	4.536	4.05	5.371	2.99769	3.325	2.13201e-06	2.9676e-05
MSTRG.7186	rna5141-EQK99142.1	801	fgr:FG06018.1	56.23	hypothetical protein	-	-	-	gi|531860766|gb|EQK99142.1|	100	Acyl-CoA N-acyltransferase [Ophiocordyceps sinensis CO18]	-	-	-	GO:0008080,GO:0042967	154	62	124	39	1777	666	29.434	12.943	20.216	8.257	236.509	89.51	3.01916	5.71349	8.45374e-07	1.35173e-05
MSTRG.3080	MSTRG.3080.1	2398	fgr:FG09061.1	83.77	hypothetical protein; K14333 2,3-dihydroxybenzoate decarboxylase [EC:4.1.1.46]	Hs21264328	24.38	[R] KOG4245 Predicted metal-dependent hydrolase of the TIM-barrel fold	gi|531864962|gb|EQL01936.1|	99.59	amidohydrolase family protein [Ophiocordyceps sinensis CO18]	sp|P80402|DBD23_ASPOR	77.22	2,3-dihydroxybenzoate decarboxylase OS=Aspergillus oryzae (strain ATCC 42149 / RIB 40) GN=AO090005000447 PE=1 SV=2	GO:0008152,GO:0016787,GO:0016829	685	406	2031	3682	5277	7143	79.597	47.721	146.695	406.087	352.165	401.848	3.02728	8.05962	5.79115e-10	2.22172e-08
MSTRG.2629	rna2034-EQL02251.1	1302	fgr:FG09979.1	59.15	hypothetical protein; K12663 delta(3,5)-Delta(2,4)-dienoyl-CoA isomerase [EC:5.3.3.-]	7289286	36.73	[I] KOG1681 Enoyl-CoA isomerase	gi|531865336|gb|EQL02251.1|	88.98	enoyl-CoA hydratase/isomerase family protein [Ophiocordyceps sinensis CO18]	sp|O35459|ECH1_MOUSE	34.19	Delta(3,5)-Delta(2,4)-dienoyl-CoA isomerase, mitochondrial OS=Mus musculus GN=Ech1 PE=1 SV=1	GO:0008152,GO:0016853	59	99	367.89	1592.93	909	940.9	10.015	18.336	53.336	300.017	107.481	112.3	3.03685	5.3183	4.60406e-09	1.37325e-07
MSTRG.837	MSTRG.837.1	925	bfu:BC1G_14472	70.41	hypothetical protein	-	-	-	gi|667660567|ref|XP_008602115.1|	75.57	glycosyl hydrolase family 92 [Beauveria bassiana ARSEF 2860]	sp|O86365|Y584_MYCTU	33.16	Uncharacterized glycosidase Rv0584 OS=Mycobacterium tuberculosis (strain ATCC 25618 / H37Rv) GN=Rv0584 PE=3 SV=1	GO:0005975,GO:0016787,GO:0030246	136.24	52	121.11	211.24	1254.98	892.56	23.1	9.619	17.534	39.726	148.166	106.377	3.03747	5.52998	3.65102e-08	8.7119e-07
MSTRG.2110	MSTRG.2110.1	2989	ppl:POSPLDRAFT_89254	55.26	hypothetical protein	-	-	-	gi|531865757|gb|EQL02629.1|	100	protein kinase subdomain-containing protein PKL/CAK/Fmp29 [Ophiocordyceps sinensis CO18]	sp|C4Y3M4|AIM9_CLAL4	25.19	Altered inheritance of mitochondria protein 9, mitochondrial OS=Clavispora lusitaniae (strain ATCC 42720) GN=AIM9 PE=3 SV=1	GO:0016301,GO:0016310	8.47	10.74	6.22	2.11	104.86	120.7	0.474	1.731	0.343	0.105	11.296	12.488	3.0562	2.34707	2.22364e-05	0.000220073
MSTRG.1497	MSTRG.1497.1	3309	fgr:FG00792.1	70.96	hypothetical protein	YPL140c	35.67	[T] KOG0581 Mitogen-activated protein kinase kinase (MAP2K)	gi|531866262|gb|EQL03086.1|	100	serine/threonine protein kinase-like protein [Ophiocordyceps sinensis CO18]	sp|Q55CE0|MKCF_DICDI	30.17	Probable serine/threonine-protein kinase mkcF OS=Dictyostelium discoideum GN=mkcF PE=3 SV=1	GO:0004674,GO:0005524,GO:0006468,GO:0009069	1854	1156	11470	6803	10089	25314	70.113	47.721	556.321	440.117	265.259	672.976	3.07645	9.56779	6.06477e-08	1.33832e-06
MSTRG.8663	MSTRG.8663.1	1576	fgr:FG10201.1	67.31	hypothetical protein; K10773 endonuclease III [EC:4.2.99.18]	SPAC30D11.07	60.14	[L] KOG1921 Endonuclease III	gi|629689921|ref|XP_007810252.1|	72.89	putative DNA repair protein NTG1 [Metarhizium acridum CQMa 102]	sp|C8VC05|NTH_EMENI	68.03	Endonuclease III homolog OS=Emericella nidulans (strain FGSC A4 / ATCC 38163 / CBS 112.46 / NRRL 194 / M139) GN=nth1 PE=3 SV=2	GO:0003677,GO:0004519,GO:0006284,GO:0090305	23.98	6.9	35.15	20.18	203.29	166.92	2.077	0.652	2.607	1.944	12.267	10.153	3.0942	3.02492	1.65239e-05	0.000170695
MSTRG.9928	MSTRG.9928.1	1287	pan:PODANSg4843	65.32	hypothetical protein; K10768 alkylated DNA repair protein alkB homolog 6	7297712	30.95	[S] KOG3200 Uncharacterized conserved protein	gi|358391811|gb|EHK41215.1|	72	hypothetical protein TRIATDRAFT_227724 [Trichoderma atroviride IMI 206040]	sp|Q5PQ59|ALKB6_XENLA	35.61	Alpha-ketoglutarate-dependent dioxygenase alkB homolog 6 OS=Xenopus laevis GN=alkbh6 PE=2 SV=1	GO:0051213	42.24	15.01	61.24	42.35	260.79	426.32	5.261	2.032	6.531	5.863	22.625	37.305	3.11486	3.89872	2.7006e-06	3.61864e-05
MSTRG.9489	MSTRG.9489.1	6436	fgr:FG08466.1	61.94	hypothetical protein	At1g63440	29.72	[P] KOG0207 Cation transport ATPase	gi|594723012|gb|EXV05898.1|	67.16	copper-(or silver)-translocating P-type ATPase [Metarhizium robertsii]	sp|Q8CN02|COPA_STAES	29.72	Copper-exporting P-type ATPase A OS=Staphylococcus epidermidis (strain ATCC 12228) GN=copA PE=3 SV=1	GO:0005524,GO:0008152,GO:0016021,GO:0019829,GO:0030001,GO:0046872,GO:0098655	213.26	113.41	606.27	387.95	2828	1203	3.895	2.258	9.546	7.922	36.054	15.445	3.14214	6.4208	2.24909e-09	7.20304e-08
MSTRG.1544	MSTRG.1544.1	1951	fgr:FG09280.1	84.67	hypothetical protein; K03841 fructose-1,6-bisphosphatase I [EC:3.1.3.11]	SPBC1198.14c	61.69	[G] KOG1458 Fructose-1,6-bisphosphatase	gi|531866204|gb|EQL03032.1|	99.62	Fructose-1,6-bisphosphatase class 1/Sedoheputulose-1,7-bisphosphatase [Ophiocordyceps sinensis CO18]	sp|P09202|F16P_SCHPO	61.69	Fructose-1,6-bisphosphatase OS=Schizosaccharomyces pombe (strain 972 / ATCC 24843) GN=fbp1 PE=3 SV=1	GO:0005829,GO:0006000,GO:0006013,GO:0006094,GO:0006096,GO:0006098,GO:0015976,GO:0016311,GO:0042132,GO:0072593	341	254	1065	324	2433	5060	40.318	35.23	98.536	40.813	205.659	430.667	3.16847	7.31904	6.86601e-10	2.54417e-08
MSTRG.7200	MSTRG.7200.1	435	fgr:FG10193.1	68.52	hypothetical protein	7294176	45.1	[C] KOG0537 Cytochrome b5	gi|589108633|ref|XP_006966339.1|	75.93	predicted protein [Trichoderma reesei QM6a]	sp|Q8X0J4|CYB5L_NEUCR	64.71	Putative cytochrome b5 B11H24.095 OS=Neurospora crassa (strain ATCC 24698 / 74-OR23-1A / CBS 708.71 / DSM 1257 / FGSC 987) GN=B11H24.095 PE=3 SV=1	GO:0020037,GO:0046872	20.76	31	50.95	55.38	309.99	358.61	11.482	16.931	21.923	33.747	108.029	127.622	3.1747	3.85394	1.70905e-07	3.35239e-06
MSTRG.4901	rna3651-EQL00635.1	672	fgr:FG00964.1	48.79	hypothetical protein	-	-	-	gi|531863312|gb|EQL00635.1|	100	hypothetical protein OCS_03652 [Ophiocordyceps sinensis CO18]	-	-	-	GO:0010181,GO:0016491,GO:0055114	57	54	170	92	785	660	13.91	14.41	35.254	24.812	133.285	113.248	3.20267	4.94632	8.26501e-10	3.01118e-08
MSTRG.7201	MSTRG.7201.1	435	fgr:FG10193.1	68.52	hypothetical protein	7294176	45.1	[C] KOG0537 Cytochrome b5	gi|589108633|ref|XP_006966339.1|	75.93	predicted protein [Trichoderma reesei QM6a]	sp|Q8X0J4|CYB5L_NEUCR	64.71	Putative cytochrome b5 B11H24.095 OS=Neurospora crassa (strain ATCC 24698 / 74-OR23-1A / CBS 708.71 / DSM 1257 / FGSC 987) GN=B11H24.095 PE=3 SV=1	GO:0020037,GO:0046872	17.24	31	48.05	44.62	304.01	348.39	8.547	16.931	19.946	24.132	104.585	121.611	3.24807	3.81057	2.20647e-07	4.1662e-06
MSTRG.661	MSTRG.661.1	1495	afm:AFUA_3G03780	48.33	hypothetical protein	-	-	-	gi|531866992|gb|EQL03769.1|	100	phosphotransferase family protein [Ophiocordyceps sinensis CO18]	-	-	-	GO:0008152,GO:0016772	6.86	10.22	18.58	23.45	98.74	134.35	1.061	1.618	2.134	4.076	8.009	11.715	3.25922	2.37097	1.13487e-05	0.00012309
MSTRG.775	MSTRG.775.1	807	mgr:MGG_04895	94.07	MG04895.4; isocitrate lyase; K01637 isocitrate lyase [EC:4.1.3.1]	YER065c	64.96	[C] KOG1260 Isocitrate lyase	gi|667645225|ref|XP_008594444.1|	93.22	isocitrate lyase [Beauveria bassiana ARSEF 2860]	sp|P0CT06|ACEA_MAGO7	94.07	Isocitrate lyase OS=Magnaporthe oryzae (strain 70-15 / ATCC MYA-4617 / FGSC 8958) GN=ICL1 PE=3 SV=1	GO:0004451,GO:0006097	243.37	159.96	1394.59	1374.8	2124.53	3384.07	50.412	36.195	246.112	315.328	306.376	492.92	3.28844	6.86322	2.34488e-12	1.38361e-10
MSTRG.5422	rna4036-EQL00244.1	977	pno:SNOG_06874	63.78	hypothetical protein; K01555 fumarylacetoacetase [EC:3.7.1.2]	7292429	60.11	[G] KOG2843 Fumarylacetoacetase	gi|632914620|gb|KDB14255.1|	80.1	fumarylacetoacetate hydrolase [Villosiclava virens]	sp|Q00770|FAAA_EMENI	63.21	Fumarylacetoacetase OS=Emericella nidulans (strain FGSC A4 / ATCC 38163 / CBS 112.46 / NRRL 194 / M139) GN=fahA PE=1 SV=3	GO:0004334,GO:0006570,GO:0042207	203	110	255	78	2319	1963	32.573	19.252	34.957	13.89	259.159	221.415	3.29074	6.4969	1.01385e-12	6.56002e-11
MSTRG.2367	MSTRG.2367.1	1455	fgr:FG06307.1	65.79	hypothetical protein	-	-	-	gi|531865541|gb|EQL02433.1|	100	spt10-like protein [Ophiocordyceps sinensis CO18]	sp|Q09927|AZET_SCHPO	40.46	L-azetidine-2-carboxylic acid acetyltransferase OS=Schizosaccharomyces pombe (strain 972 / ATCC 24843) GN=ppr1 PE=1 SV=1	GO:0008080,GO:0042967	37.77	58.99	230	111.31	564.62	792.49	4.9	7.588	24.474	15.991	66.041	78.585	3.29673	4.85061	4.46202e-09	1.33823e-07
MSTRG.4825	rna3605-EQL00684.1	1101	pan:PODANSg3076	41.74	hypothetical protein	-	-	-	gi|531863380|gb|EQL00684.1|	100	glycosyl transferase [Ophiocordyceps sinensis CO18]	-	-	-	GO:0008152,GO:0016740	12	10	96	35	157	153	1.524	1.38	10.446	4.943	13.91	13.672	3.31053	2.7595	1.31798e-06	1.97642e-05
MSTRG.4913	rna3665-EQL00620.1	1901	fgr:FG07192.1	79.81	CT1B_FUSSO CUTINASE TRANSCRIPTION FACTOR 1 BETA	-	-	-	gi|531863294|gb|EQL00620.1|	98.43	Cutinase transcription factor 1 beta [Ophiocordyceps sinensis CO18]	sp|P52959|CTF1B_FUSSO	80.44	Cutinase transcription factor 1 beta OS=Fusarium solani subsp. pisi GN=CTF1-BETA PE=2 SV=1	GO:0000981,GO:0003677,GO:0005634,GO:0006357,GO:0008270	52	33	416	578	669	530	5.374	3.712	36.831	66.439	48.147	38.463	3.32707	4.66761	2.24675e-09	7.20304e-08
MSTRG.2331	rna1831-EQL02463.1	2355	pno:SNOG_09022	47.61	hypothetical protein	HsM7661898	24.31	[GMO] KOG1066 Glucosidase II catalytic (alpha) subunit and related enzymes, glycosyl hydrolase family 31	gi|531865573|gb|EQL02463.1|	100	Glycoside hydrolase, family 31 [Ophiocordyceps sinensis CO18]	sp|Q9P999|XYLS_SULSO	26.61	Alpha-xylosidase OS=Sulfolobus solfataricus (strain ATCC 35092 / DSM 1617 / JCM 11322 / P2) GN=xylS PE=1 SV=1	GO:0004553,GO:0005975	258	107	332	143	3872	1334	13.661	6.158	15.122	8.455	143.021	49.652	3.35369	6.76781	1.84629e-08	4.75004e-07
MSTRG.2923	rna2246-EQL02040.1	1521	fgr:FG10065.1	41.79	hypothetical protein; K00459 nitronate monooxygenase [EC:1.13.12.16]	-	-	-	gi|531865093|gb|EQL02040.1|	76.69	2-nitropropane dioxygenase [Ophiocordyceps sinensis CO18]	sp|Q01284|2NPD_NEUCR	35.99	Nitronate monooxygenase OS=Neurospora crassa (strain ATCC 24698 / 74-OR23-1A / CBS 708.71 / DSM 1257 / FGSC 987) GN=ncd-2 PE=1 SV=1	GO:0004497	202	124	757	762	2593	2102	24.929	16.68	79.99	104.566	222.972	182.329	3.36144	6.62277	1.2276e-13	9.00541e-12
MSTRG.5164	MSTRG.5164.1	1628	pcs:Pc21g23490	40.21	Pc21g23490; K04713 C4-hydroxylase [EC:1.14.-.-]	SPBC887.15c	33.68	[I] KOG0874 Sphingolipid hydroxylase	gi|531863053|gb|EQL00445.1|	100	sphinganine hydroxylase Sur2 [Ophiocordyceps sinensis CO18]	sp|O94298|SUR2_SCHPO	33.68	Sphingolipid C4-hydroxylase sur2 OS=Schizosaccharomyces pombe (strain 972 / ATCC 24843) GN=sur2 PE=3 SV=1	GO:0005506,GO:0006633,GO:0016021,GO:0016491,GO:0055114	84.19	35.1	132.94	175.85	1477.54	279.32	9.665	4.327	13.072	22.784	118.927	23.053	3.39895	5.20157	7.70444e-06	8.75886e-05
MSTRG.7123	rna5099-EQK99185.1	1017	fgr:FG04244.1	55	hypothetical protein	-	-	-	gi|531860848|gb|EQK99185.1|	93.49	F5/8 type C domain protein [Ophiocordyceps sinensis CO18]	sp|Q09788|ASL1_SCHPO	26.46	Alkali-sensitive linkage protein 1 OS=Schizosaccharomyces pombe (strain 972 / ATCC 24843) GN=asl1 PE=1 SV=1	GO:0005975	110	187	1326	4802	1202	3319	16.8	31.141	173.07	814.16	127.857	356.277	3.41993	6.56993	2.63679e-09	8.32199e-08
MSTRG.838	MSTRG.838.1	2740	afv:AFLA_038530	48.78	elastinolytic metalloproteinase Mep	-	-	-	gi|531866792|gb|EQL03578.1|	98.92	elastinolytic metalloproteinase Mep [Ophiocordyceps sinensis CO18]	sp|B8NC58|MEP1_ASPFN	48.78	Extracellular metalloproteinase mep OS=Aspergillus flavus (strain ATCC 200026 / FGSC A1120 / NRRL 3357 / JCM 12722 / SRRC 167) GN=mep PE=3 SV=1	GO:0004222,GO:0005615,GO:0006508,GO:0008270	23.76	3	76.89	47.76	227.02	179.44	1.073	0.201	2.969	2.467	7.196	5.687	3.43661	3.12397	2.48159e-05	0.000241422
MSTRG.44	rna39-EQL04248.1	2450	pan:PODANSg6658	47.11	hypothetical protein	-	-	-	gi|531867492|gb|EQL04248.1|	96.39	Nucleoside phosphorylase domain protein [Ophiocordyceps sinensis CO18]	-	-	-	GO:0003824,GO:0009116,GO:0043531	18	25	70	20	347	328	2.36	3.574	7.849	2.916	31.688	30.223	3.46125	3.84015	1.457e-08	3.83949e-07
MSTRG.7386	MSTRG.7386.1	2600	bfu:BC1G_09443	84.19	malate synthase ; K01638 malate synthase [EC:2.3.3.9]	YIR031c	66.87	[C] KOG1261 Malate synthase	gi|531860534|gb|EQK99022.1|	100	malate synthase [Ophiocordyceps sinensis CO18]	sp|P28344|MASY_EMENI	83.18	Malate synthase, glyoxysomal OS=Emericella nidulans (strain FGSC A4 / ATCC 38163 / CBS 112.46 / NRRL 194 / M139) GN=acuE PE=3 SV=3	GO:0004474,GO:0006090,GO:0006097,GO:0006099	939.3	476.72	2300.06	1494.03	12669.9	9497.65	65.055	35.43	137.696	117.431	620.213	459.547	3.4879	8.84779	2.18092e-11	1.05706e-09
MSTRG.11131	rna6941-EQK97345.1	534	fgr:FG08462.1	82.93	hypothetical protein	SPAC139.04c	34.57	[R] KOG2820 FAD-dependent oxidoreductase	gi|531850734|gb|EQK97345.1|	100	sarcosine oxidase [Ophiocordyceps sinensis CO18]	sp|Q9UTM9|FAP2_SCHPO	34.57	L-saccharopine oxidase OS=Schizosaccharomyces pombe (strain 972 / ATCC 24843) GN=fap2 PE=1 SV=1	GO:0016491,GO:0055114	17	13	20	11	408	74	17.173	14.686	16.412	11.82	284.456	52.776	3.49782	3.35449	3.71342e-05	0.000342537
MSTRG.10155	rna6651-EQK97636.1	858	cim:CIMG_03093	48.4	hypothetical protein; K07046	-	-	-	gi|531855280|gb|EQK97636.1|	100	Amidohydrolase family protein [Ophiocordyceps sinensis CO18]	sp|A6XIG6|SLMH_HYDIT	29.86	4-sulfomuconolactone hydrolase OS=Hydrogenophaga intermedia PE=1 SV=1	GO:0008152,GO:0016787	36	15	77	56	275	538	6.277	2.86	11.467	10.838	33.415	65.983	3.51494	4.10312	1.13981e-07	2.33488e-06
MSTRG.3496	MSTRG.3496.1	1725	afv:AFLA_061140	48.71	cytochrome P450, putative	7302303	25	[Q] KOG0158 Cytochrome P450 CYP3/CYP5/CYP6/CYP9 subfamilies	gi|531864580|gb|EQL01619.1|	93.29	Cytochrome P450 [Ophiocordyceps sinensis CO18]	sp|P17549|CP53_ASPNG	29.21	Benzoate 4-monooxygenase OS=Aspergillus niger GN=bphA PE=1 SV=1	GO:0004497,GO:0005506,GO:0016705,GO:0020037,GO:0055114	180	521	840	490	7563	4742	14.508	45.689	59.422	45.223	424.854	268.522	3.6046	7.98913	2.83063e-09	8.90787e-08
MSTRG.3676	rna2814-EQL01477.1	1928	cpw:CPC735_025000	27.47	AMP-binding enzyme, putative	At3g16170	27.96	[I] KOG1176 Acyl-CoA synthetase	gi|531864408|gb|EQL01477.1|	99.6	acyl-CoA synthetase [Ophiocordyceps sinensis CO18]	sp|Q58DN7|ACSF3_BOVIN	29.66	Acyl-CoA synthetase family member 3, mitochondrial OS=Bos taurus GN=ACSF3 PE=2 SV=1	GO:0003824,GO:0008152	9	32	22	30	292	429	0.689	2.659	1.438	2.55	15.529	23.001	3.60809	3.92482	4.50475e-07	7.80783e-06
MSTRG.104	rna92-EQL04193.1	2583	fgr:FG08601.1	86.17	similar to phosphoenolpyruvate carboxykinase; K01610 phosphoenolpyruvate carboxykinase (ATP) [EC:4.1.1.49]	-	-	-	gi|531867435|gb|EQL04193.1|	94.49	phosphoenolpyruvate carboxykinase [Ophiocordyceps sinensis CO18]	sp|Q7RVS9|PCKA_NEUCR	84.47	Phosphoenolpyruvate carboxykinase [ATP] OS=Neurospora crassa (strain ATCC 24698 / 74-OR23-1A / CBS 708.71 / DSM 1257 / FGSC 987) GN=acu-6 PE=3 SV=2	GO:0004612,GO:0005524,GO:0006094,GO:0006099,GO:0015976,GO:0016301,GO:0016310	1054	1611	28723	13032	25856	20513	77.294	128.552	1809.15	1065.46	1321.97	1057.1	3.60917	9.90283	3.1248e-12	1.80457e-10
MSTRG.6522	rna4726-EQK99555.1	1531	nfi:NFIA_101560	37.22	hypothetical protein	-	-	-	gi|531861520|gb|EQK99555.1|	91.27	Chloramphenicol acetyltransferase-like domain protein [Ophiocordyceps sinensis CO18]	-	-	-	GO:0008152,GO:0016740	34	7	543	75	477	245	3.252	0.727	44.578	7.995	31.821	16.48	3.66194	3.9166	1.20239e-06	1.83781e-05
MSTRG.3376	MSTRG.3376.1	1959	fgr:FG01751.1	34.55	hypothetical protein	-	-	-	gi|531864672|gb|EQL01695.1|	99.6	serine/threonine-protein kinase Sgk2 [Ophiocordyceps sinensis CO18]	-	-	-	GO:0004672,GO:0005524,GO:0006468	152	68	189	98	2078	1873.33	11.437	5.819	12.432	8.434	110.892	98.926	3.68758	6.34917	5.67279e-14	4.39737e-12
MSTRG.2715	rna2103-EQL02178.1	1104	fgr:FG08467.1	64.21	hypothetical protein	YNL289w	46.45	[R] KOG1674 Cyclin	gi|531865255|gb|EQL02178.1|	100	cyclin [Ophiocordyceps sinensis CO18]	sp|P24867|PCL1_YEAST	46.45	PHO85 cyclin-1 OS=Saccharomyces cerevisiae (strain ATCC 204508 / S288c) GN=PCL1 PE=1 SV=1	GO:0000079,GO:0019901	31	20	169	440	435	514	3.929	2.759	18.332	61.987	38.403	45.773	3.72546	4.30516	1.89531e-10	7.8241e-09
MSTRG.10154	MSTRG.10154.1	2015	fgr:FG04576.1	39.08	hypothetical protein	-	-	-	gi|531855279|gb|EQK97635.1|	84.32	N-terminal fungal transcription regulatory domain-containing protein [Ophiocordyceps sinensis CO18]	-	-	-	GO:0006351	113	66	368	360	1403	1950	8.05	5.142	22.303	28.449	68.713	96.618	3.74374	6.11175	2.46507e-14	1.96789e-12
MSTRG.6489	MSTRG.6489.1	2586	nfi:NFIA_007690	38.68	FAD binding domain protein	-	-	-	gi|531861571|gb|EQK99588.1|	99.8	FAD binding domain protein [Ophiocordyceps sinensis CO18]	-	-	-	GO:0016491,GO:0055114	128	81	1860	96	3305	809	6.571	4.515	82.05	5.424	116.437	28.626	3.80536	6.39302	1.96373e-09	6.40248e-08
MSTRG.1624	MSTRG.1624.1	1604	fgr:FG10322.1	74.29	hypothetical protein	At1g03030	40.35	[FH] KOG2702 Predicted panthothenate kinase/uridine kinase-related protein	gi|572274642|gb|ETR98145.1|	78.33	P-loop containing nucleoside triphosphate hydrolase protein [Trichoderma reesei RUT C-30]	sp|A7A245|YFH7_YEAS7	34	ATP-dependent kinase YFH7 OS=Saccharomyces cerevisiae (strain YJM789) GN=YFH7 PE=3 SV=1	GO:0005524,GO:0016020,GO:0016301,GO:0016310,GO:0016787,GO:0055085	2.38	2.57	2.41	1.26	55.7	47.24	0.226	0.263	0.195	0.136	3.644	3.115	3.8086	1.23275	1.97334e-05	0.000198619
MSTRG.3938	MSTRG.3938.1	3336	bfu:BC1G_07752	34.66	hypothetical protein	SPAP7G5.04c	24.24	[Q] KOG1178 Non-ribosomal peptide synthetase/alpha-aminoadipate reductase and related enzymes	gi|531864181|gb|EQL01287.1|	97.98	NRPS-like enzyme [Ophiocordyceps sinensis CO18]	sp|Q75BB3|LYS2_ASHGO	24.87	L-aminoadipate-semialdehyde dehydrogenase large subunit OS=Ashbya gossypii (strain ATCC 10895 / CBS 109.51 / FGSC 9923 / NRRL Y-1056) GN=LYS2 PE=3 SV=2	GO:0003824,GO:0008152	208	176	491	285	3884	3717	7.756	7.199	15.716	12.019	102.784	98.961	3.81271	7.28265	3.49605e-16	3.64967e-14
MSTRG.5989	MSTRG.5989.1	766	fgr:FG10967.1	73.68	hypothetical protein; K01476 arginase [EC:3.5.3.1]	YPL111w	47.01	[E] KOG2965 Arginase	gi|358386115|gb|EHK23711.1|	78.14	hypothetical protein TRIVIDRAFT_36504 [Trichoderma virens Gv29-8]	sp|P33280|ARGI_NEUCR	72	Arginase OS=Neurospora crassa (strain ATCC 24698 / 74-OR23-1A / CBS 708.71 / DSM 1257 / FGSC 987) GN=aga-1 PE=1 SV=3	GO:0004053,GO:0005634,GO:0005829,GO:0006560,GO:0008270,GO:0019547,GO:0030145,GO:0043332,GO:0090368,GO:0090369	120.97	152.67	256.5	624.81	1955.69	3542.46	28.192	38.879	50.84	160.982	317.14	580.464	3.82455	6.8191	1.20009e-14	1.03328e-12
MSTRG.2337	MSTRG.2337.1	1194	pan:PODANSg2340	53.04	hypothetical protein	SPCC825.04c	32.5	[R] KOG2488 Acetyltransferase (GNAT) domain-containing protein	gi|531865556|gb|EQL02447.1|	87.79	acetyltransferase [Ophiocordyceps sinensis CO18]	sp|Q9USH6|YJQ4_SCHPO	32.5	Uncharacterized N-acetyltransferase C825.04c OS=Schizosaccharomyces pombe (strain 972 / ATCC 24843) GN=SPCC825.04c PE=3 SV=1	GO:0008080,GO:0042967	24	21	43	53	292	613	3.41	3.7	6.318	10.138	29.929	63.385	3.83317	4.23355	1.93925e-09	6.34171e-08
MSTRG.4752	rna3550-EQL00731.1	990	ssl:SS1G_07964	34.86	hypothetical protein	At1g35190	25.44	[QR] KOG0143 Iron/ascorbate family oxidoreductases	gi|531863443|gb|EQL00731.1|	82.07	Oxoglutarate/iron-dependent oxygenase [Ophiocordyceps sinensis CO18]	-	-	-	GO:0016706,GO:0046872,GO:0055114	24	153	197	397	2244	1524	4.268	29.674	29.883	78.239	277.733	190.428	3.86993	6.26735	9.68265e-08	2.03336e-06
MSTRG.2850	rna2199-EQL02084.1	465	fgr:FG05035.1	94.81	hypothetical protein; K06215 pyridoxine biosynthesis protein [EC:4.-.-.-]	SPAC29B12.04	62.34	[H] KOG1606 Stationary phase-induced protein, SOR/SNZ family	gi|531865148|gb|EQL02084.1|	100	pyridoxine biosynthesis protein [Ophiocordyceps sinensis CO18]	sp|O59905|PDX1_CERNC	74.68	Pyridoxine biosynthesis protein PDX1 OS=Cercospora nicotianae GN=PDX1 PE=1 SV=1	GO:0003824,GO:0042823	88.61	79.52	537.07	492.53	1789.69	1770.41	38.85	38.34	197.841	236.316	544.918	546.45	3.9	6.18579	1.2742e-17	1.75114e-15
MSTRG.3682	rna2818-EQL01460.1	1260	ang:ANI_1_1040034	44.36	An03g01390; FAD binding domain protein	At5g67030	28.89	[CR] KOG2614 Kynurenine 3-monooxygenase and related flavoprotein monooxygenases	gi|531864388|gb|EQL01460.1|	100	monooxygenase [Ophiocordyceps sinensis CO18]	sp|P9WM51|Y1260_MYCTU	33.97	Uncharacterized protein Rv1260 OS=Mycobacterium tuberculosis (strain ATCC 25618 / H37Rv) GN=Rv1260 PE=1 SV=1	GO:0004497,GO:0055114	83	92	402	411	1276	2422	8.965	10.823	37.193	49.383	96.011	183.777	3.90264	6.24387	8.35478e-15	7.31515e-13
MSTRG.3006	rna2304-EQL01988.1	1614	ngr:NAEGRDRAFT_81982	24.76	cytochrome p450 family protein	At3g14620	28.57	[QI] KOG0157 Cytochrome P450 CYP4/CYP19/CYP26 subfamilies	gi|531865026|gb|EQL01988.1|	100	Cytochrome P450 [Ophiocordyceps sinensis CO18]	sp|Q05047|C72A1_CATRO	29.28	Secologanin synthase OS=Catharanthus roseus GN=CYP72A1 PE=2 SV=1	GO:0004497,GO:0005506,GO:0016705,GO:0020037,GO:0055114	284	50	140	59	6012	958	22.953	4.402	9.713	5.32	338.778	54.417	3.91733	7.14317	8.43266e-06	9.47758e-05
MSTRG.5988	MSTRG.5988.1	1701	fgr:FG10967.1	73.47	hypothetical protein; K01476 arginase [EC:3.5.3.1]	YPL111w	46.59	[E] KOG2965 Arginase	gi|358386115|gb|EHK23711.1|	77.96	hypothetical protein TRIVIDRAFT_36504 [Trichoderma virens Gv29-8]	sp|P33280|ARGI_NEUCR	71.77	Arginase OS=Neurospora crassa (strain ATCC 24698 / 74-OR23-1A / CBS 708.71 / DSM 1257 / FGSC 987) GN=aga-1 PE=1 SV=3	GO:0004053,GO:0005634,GO:0005829,GO:0006560,GO:0008270,GO:0019547,GO:0030145,GO:0043332,GO:0090368,GO:0090369	26.03	21.33	30.5	131.19	315.31	715.54	3.534	3.148	3.535	19.774	29.788	68.203	3.96094	4.41161	8.75402e-10	3.13821e-08
MSTRG.6942	rna4985-EQK99296.1	702	bam:Bamb_6429	54.11	aspartate racemase; K01779 aspartate racemase [EC:5.1.1.13]	-	-	-	gi|531861078|gb|EQK99296.1|	100	aspartate racemase [Ophiocordyceps sinensis CO18]	sp|P03813|YGEA_ECOLI	41.15	Uncharacterized protein YgeA OS=Escherichia coli (strain K12) GN=ygeA PE=1 SV=1	GO:0006520,GO:0036361	11	25	59	18	333	472	2.518	6.258	11.504	4.567	53.135	76.092	3.96299	4.05758	1.66989e-09	5.57847e-08
MSTRG.2219	MSTRG.2219.1	1882	fgr:FG04453.1	67.66	hypothetical protein; K10734 GINS complex subunit 3	YOL146w	29.58	[S] KOG1106 Uncharacterized conserved protein	gi|531865677|gb|EQL02557.1|	100	DNA replication complex GINS protein psf-3 [Ophiocordyceps sinensis CO18]	sp|Q4IEA5|PSF3_GIBZE	67.66	DNA replication complex GINS protein PSF3 OS=Gibberella zeae (strain PH-1 / ATCC MYA-4620 / FGSC 9075 / NRRL 31084) GN=PSF3 PE=3 SV=1	GO:0005634,GO:0006260	308.25	159.02	717.4	650.78	4934.23	5683.53	24.466	13.369	48.326	55.957	317.115	331.898	4.02735	7.75192	5.49213e-15	4.92794e-13
MSTRG.75	rna72-EQL04237.1	3627	fgr:FG10960.1	64.54	hypothetical protein; K11987 prostaglandin-endoperoxide synthase 2 [EC:1.14.99.1]	Hs4506265	28.39	[R] KOG2408 Peroxidase/oxygenase	gi|531867480|gb|EQL04237.1|	95.5	heme peroxidase [Ophiocordyceps sinensis CO18]	sp|Q4WY82|PPOC_ASPFU	48.92	Linoleate 10R-lipoxygenase OS=Neosartorya fumigata (strain ATCC MYA-4609 / Af293 / CBS 101355 / FGSC A1100) GN=ppoC PE=1 SV=2	GO:0004601,GO:0005506,GO:0006804,GO:0006979,GO:0016705,GO:0020037,GO:0055114	225	60	196	27	2884	3596	8.095	2.345	6.077	1.087	72.398	90.932	4.04212	7.04019	1.37615e-11	7.01449e-10
MSTRG.68	MSTRG.68.1	1716	pno:SNOG_16466	66.67	hypothetical protein	CE05969	46.58	[CR] KOG0134 NADH:flavin oxidoreductase/12-oxophytodienoate reductase	gi|342869580|gb|EGU73208.1|	72.73	hypothetical protein FOXB_16284 [Fusarium oxysporum Fo5176]	sp|P32382|NADO_THEBR	32.5	NADH oxidase OS=Thermoanaerobacter brockii PE=1 SV=1	GO:0010181,GO:0016491,GO:0055114	227	375.14	1295.43	471.21	7459.49	6908	19.69	35.343	96.355	44.293	453.48	418.697	4.06386	8.18443	3.74334e-15	3.44419e-13
MSTRG.2849	MSTRG.2849.1	817	fgr:FG05035.1	94.03	hypothetical protein; K06215 pyridoxine biosynthesis protein [EC:4.-.-.-]	SPAC29B12.04	69.09	[H] KOG1606 Stationary phase-induced protein, SOR/SNZ family	gi|531865148|gb|EQL02084.1|	100	pyridoxine biosynthesis protein [Ophiocordyceps sinensis CO18]	sp|O59905|PDX1_CERNC	70.9	Pyridoxine biosynthesis protein PDX1 OS=Cercospora nicotianae GN=PDX1 PE=1 SV=1	GO:0003824,GO:0042823	96.39	122.48	852.93	722.47	2587.31	3158.59	22.592	31.392	170.074	187.278	422.157	520.765	4.2158	6.8578	1.93602e-19	3.62402e-17
MSTRG.10253	MSTRG.10253.1	435	fgr:FG01141.1	74.83	hypothetical protein; K00294 1-pyrroline-5-carboxylate dehydrogenase [EC:1.5.1.12]	SPBC24C6.04	55.86	[E] KOG2455 Delta-1-pyrroline-5-carboxylate dehydrogenase	gi|666398932|gb|KEY64786.1|	83.92	hypothetical protein S7711_08065 [Stachybotrys chartarum IBT 7711]	sp|Q9P8I0|PUT2_EMENI	66.43	Delta-1-pyrroline-5-carboxylate dehydrogenase, mitochondrial OS=Emericella nidulans (strain FGSC A4 / ATCC 38163 / CBS 112.46 / NRRL 194 / M139) GN=prnC PE=3 SV=2	GO:0003842,GO:0006525,GO:0006537,GO:0006561,GO:0016620,GO:0055114	50	59	322	50	1594	1354	24.782	32.22	133.651	27.048	548.379	472.64	4.2521	5.8944	9.8405e-18	1.38751e-15
MSTRG.9624	rna6443-EQK97843.1	1434	pan:PODANSg5505	52.1	hypothetical protein	-	-	-	gi|531856687|gb|EQK97843.1|	100	cellulase family protein [Ophiocordyceps sinensis CO18]	sp|P23548|GUN_PAEPO	21.05	Endoglucanase OS=Paenibacillus polymyxa PE=3 SV=2	GO:0004553,GO:0005975	379	262	930	848	9213	8263	35.124	26.438	73.932	87.53	595.131	538.149	4.2803	8.45522	1.42216e-17	1.93005e-15
MSTRG.10672	MSTRG.10672.1	2741	fgr:FG05120.1	62.45	hypothetical protein	-	-	-	gi|358384769|gb|EHK22366.1|	66.31	hypothetical protein TRIVIDRAFT_54183 [Trichoderma virens Gv29-8]	sp|P49413|UAY_EMENI	38.48	Positive regulator of purine utilization OS=Emericella nidulans (strain FGSC A4 / ATCC 38163 / CBS 112.46 / NRRL 194 / M139) GN=uaY PE=3 SV=2	GO:0005488,GO:0006351	251	183	503	250	9009	3327	11.494	9.105	19.817	13.9	287.693	107.035	4.3341	7.94601	1.59602e-13	1.13255e-11
MSTRG.9697	rna6473-EQK97814.1	1437	afm:AFUA_4G09390	43.33	DUF563 domain protein	7295961	24.9	[S] KOG4698 Uncharacterized conserved protein	gi|531856508|gb|EQK97814.1|	100	glycosyltransferase family 61 protein [Ophiocordyceps sinensis CO18]	sp|Q5NDL3|EOGT_CHICK	23.97	EGF domain-specific O-linked N-acetylglucosamine transferase OS=Gallus gallus GN=EOGT PE=2 SV=2	GO:0008152,GO:0016757	37	50	20	106	381	2193	3.421	5.029	1.586	10.911	24.551	142.479	4.38569	5.70205	1.24691e-08	3.35924e-07
MSTRG.6855	rna4931-EQK99353.1	1408	ncr:NCU10691	85.66	3-ketoacyl-CoA thiolase	YIL160c	52.12	[I] KOG1389 3-oxoacyl CoA thiolase	gi|531861195|gb|EQK99353.1|	100	3-ketoacyl-CoA thiolase [Ophiocordyceps sinensis CO18]	sp|Q05493|THIK_YARLI	58.87	3-ketoacyl-CoA thiolase, peroxisomal OS=Yarrowia lipolytica (strain CLIB 122 / E 150) GN=POT1 PE=3 SV=1	GO:0008152,GO:0016747	244	178	862	1346	6573	6148	26.34	20.932	79.758	161.724	494.563	466.497	4.42359	7.99104	4.55205e-19	7.97122e-17
MSTRG.5423	MSTRG.5423.1	3249	fgr:FG01740.1	45.71	hypothetical protein	Hs13184046	24.48	[QI] KOG0157 Cytochrome P450 CYP4/CYP19/CYP26 subfamilies	gi|531862785|gb|EQL00245.1|	99.73	cytochrome P450 3A17 [Ophiocordyceps sinensis CO18]	sp|O13317|TRI11_FUSSP	34.95	Isotrichodermin C-15 hydroxylase OS=Fusarium sporotrichioides GN=TRI11 PE=3 SV=1	GO:0004497,GO:0005506,GO:0016705,GO:0020037,GO:0055114	290.07	452.72	1472.59	2038.02	12211.3	11284.6	21.79	38.403	97.385	176.252	682.784	657.557	4.47139	8.87338	4.42445e-17	5.58561e-15
MSTRG.3155	rna2414-EQL01866.1	378	pcs:Pc14g00190	55.83	Pc14g00190; K00008 L-iditol 2-dehydrogenase [EC:1.1.1.14]	SPBC1773.05c	32.76	[Q] KOG0024 Sorbitol dehydrogenase	gi|531864879|gb|EQL01866.1|	100	Alcohol dehydrogenase superfamily, zinc-type [Ophiocordyceps sinensis CO18]	sp|Q763T4|LAD_ASPOZ	44.44	L-arabinitol 4-dehydrogenase OS=Aspergillus oryzae GN=ladA PE=1 SV=1	GO:0006059,GO:0008270,GO:0050019,GO:0055114	87	27	258	280	1810	1829	57.355	19.703	141.054	199.799	826.726	849.828	4.52329	6.18539	1.76743e-15	1.72245e-13
MSTRG.587	rna483-EQL03799.1	933	plu:plu3986	42.9	hypothetical protein	Hs8393177	26.63	[H] KOG1270 Methyltransferases	gi|531867024|gb|EQL03799.1|	100	methyltransferase type 12 [Ophiocordyceps sinensis CO18]	sp|Q9NZJ6|COQ3_HUMAN	26.67	Hexaprenyldihydroxybenzoate methyltransferase, mitochondrial OS=Homo sapiens GN=COQ3 PE=1 SV=3	GO:0008168,GO:0032259	7	8	82	29	459	133	1.095	1.367	10.966	5.038	50.031	14.629	4.77778	3.57785	5.16533e-09	1.53644e-07
MSTRG.5445	MSTRG.5445.1	2225	fgr:FG07834.1	42.67	hypothetical protein	SPBC2F12.09c	33.33	[K] KOG1414 Transcriptional activator FOSB/c-Fos and related bZIP transcription factors	gi|531862779|gb|EQL00243.1|	100	Basic-Leucine zipper transcription factor [Ophiocordyceps sinensis CO18]	sp|P78962|ATF21_SCHPO	33.33	Transcription factor atf21 OS=Schizosaccharomyces pombe (strain 972 / ATCC 24843) GN=atf21 PE=3 SV=1	GO:0003700,GO:0005634,GO:0005667,GO:0006355,GO:0043565,GO:0045449	0	4.26	2	1.63	120.55	50.28	0	0.276	0.362	0.105	6.183	2.089	4.82538	1.86032	3.60323e-06	4.64611e-05
MSTRG.3459	rna2654-EQL01634.1	930	uma:UM04922.1	52.36	hypothetical protein	SPAC2F3.05c	45.49	[R] KOG1577 Aldo/keto reductase family proteins	gi|531864601|gb|EQL01634.1|	100	2,5-diketo-D-gluconic acid reductase A [Ophiocordyceps sinensis CO18]	sp|A0QV10|Y2408_MYCS2	48.84	Uncharacterized oxidoreductase MSMEG_2408/MSMEI_2347 OS=Mycobacterium smegmatis (strain ATCC 700084 / mc(2)155) GN=MSMEG_2408 PE=1 SV=1	GO:0016491,GO:0055114	22	4	2	1	919	118	3.455	0.69	0.269	0.178	100.576	13.032	4.8335	4.36788	1.29977e-06	1.95994e-05
MSTRG.9556	MSTRG.9556.1	2826	mgr:MGG_08631	55.06	MG08631.4; hypothetical protein	Hs11034825	35.38	[IE] KOG1430 C-3 sterol dehydrogenase/3-beta-hydroxysteroid dehydrogenase and related dehydrogenases	gi|531856842|gb|EQK97873.1|	84.28	NAD dependent epimerase/dehydratase family protein [Ophiocordyceps sinensis CO18]	sp|Q99LB6|MAT2B_MOUSE	35.74	Methionine adenosyltransferase 2 subunit beta OS=Mus musculus GN=Mat2b PE=2 SV=1	GO:0008831,GO:0009225,GO:0019872,GO:0030639,GO:0045226,GO:0055114	51	49	208	195	1938	2212	2.845	3.336	10.743	15.301	88.591	96.838	4.87622	6.3621	6.85491e-25	4.13466e-22
MSTRG.2696	MSTRG.2696.1	8605	act:ACLA_055790	50.16	polyketide synthase, putative	CE09880	38.07	[I] KOG1202 Animal-type fatty acid synthase and related proteins	gi|121714693|ref|XP_001274957.1|	50.16	polyketide synthase, putative [Aspergillus clavatus NRRL 1]	sp|Q9Y7D5|LOVF_ASPTE	44.65	Lovastatin diketide synthase LovF OS=Aspergillus terreus GN=lovF PE=1 SV=1	GO:0003824,GO:0005488,GO:0008152	18.82	13.16	213.36	93.41	1271.1	85.9	0.35	0.263	3.358	1.923	12.566	1.106	4.89893	4.74825	1.80707e-06	2.58149e-05
MSTRG.11169	MSTRG.11169.1	691	vpo:Kpol_1013p77	60.4	hypothetical protein ; K04565 Cu/Zn superoxide dismutase [EC:1.15.1.1]	YJR104c	62.38	[P] KOG0441 Cu2+/Zn2+ superoxide dismutase SOD1	gi|531850430|gb|EQK97331.1|	83	Superoxide dismutase [Ophiocordyceps sinensis CO18]	sp|Q8J0N3|SODC_ISATE	64.36	Superoxide dismutase [Cu-Zn] OS=Isaria tenuipes GN=SOD1 PE=3 SV=3	GO:0006801,GO:0016209,GO:0016491,GO:0046872,GO:0055114	268	183	358	480	9720	9295	96.352	72.19	110.411	189.619	2433.35	2359.29	4.90965	8.5521	2.75913e-21	7.13236e-19
MSTRG.847	MSTRG.847.1	2006	pan:PODANSg855	47.86	hypothetical protein; K13690 alpha-1,3-mannosyltransferase [EC:2.4.1.-]	-	-	-	gi|531866798|gb|EQL03584.1|	100	alpha-1,3-mannosyltransferase CMT1 [Ophiocordyceps sinensis CO18]	sp|Q6U1Z4|CMT1_CRYNJ	35.8	Alpha-1,3-mannosyltransferase CMT1 OS=Cryptococcus neoformans var. neoformans serotype D (strain JEC21 / ATCC MYA-565) GN=CMT1 PE=1 SV=1	GO:0008152,GO:0016757	4	5	31	244	162	234	0.248	0.339	1.688	17.213	7.262	10.513	4.93018	3.01629	1.10277e-10	4.7323e-09
MSTRG.472	MSTRG.472.1	1130	fgr:FG04768.1	63.85	hypothetical protein	-	-	-	gi|531867122|gb|EQL03893.1|	100	endo-1,3(4)-beta-glucanase [Ophiocordyceps sinensis CO18]	sp|P45798|GUB_RHOMR	30.92	Beta-glucanase OS=Rhodothermus marinus GN=bglA PE=1 SV=1	GO:0005975,GO:0052736	132	57	136.39	232	4199.35	4062.18	20.876	8.93	17.599	43.06	468.975	446.585	4.97167	7.34883	1.75529e-19	3.34379e-17
MSTRG.2127	rna1680-EQL02618.1	754	ssl:SS1G_09476	46.28	hypothetical protein	-	-	-	gi|531865744|gb|EQL02619.1|	100	alpha beta hydrolase fold family [Ophiocordyceps sinensis CO18]	-	-	-	GO:0008152,GO:0016787	2	0	4	0	82.75	21.36	0.463	0	0.779	0	13.205	3.44	5.07397	1.1921	5.40428e-05	0.000465669
MSTRG.4727	rna3532-EQL00758.1	1059	pan:PODANSg3076	39.01	hypothetical protein	At2g38150	25.43	[G] KOG1928 Alpha-1,4-N-acetylglucosaminyltransferase	gi|531863477|gb|EQL00758.1|	100	glycosyl transferase [Ophiocordyceps sinensis CO18]	-	-	-	GO:0008152,GO:0016740	0	2	9	3	60	51	0	0.288	1.03	0.449	5.577	4.783	5.1481	1.28082	1.50638e-06	2.2131e-05
MSTRG.3944	MSTRG.3944.1	1189	uma:UM04480.1	56.5	hypothetical protein	CE12212	33.33	[Q] KOG0023 Alcohol dehydrogenase, class V	gi|531864182|gb|EQL01288.1|	91.59	Alcohol dehydrogenase superfamily, zinc-type [Ophiocordyceps sinensis CO18]	sp|P42327|ADH2_GEOSE	36.44	Alcohol dehydrogenase OS=Geobacillus stearothermophilus GN=adh PE=1 SV=1	GO:0008270,GO:0016491,GO:0055114	145	124	207	144	6233	7258	19.182	18.073	24.446	22.157	601.198	706.832	5.15436	8.05127	1.10214e-23	4.78636e-21
MSTRG.5782	MSTRG.5782.1	1217	ssl:SS1G_13315	66.54	hypothetical protein ; K00059 3-oxoacyl-[acyl-carrier protein] reductase [EC:1.1.1.100]	At4g13180	35.36	[R] KOG0725 Reductases with broad range of substrate specificities	gi|531862269|gb|EQL00022.1|	94.01	NAD(P)-binding domain protein [Ophiocordyceps sinensis CO18]	sp|Q00791|STCU_EMENI	48.73	Versicolorin reductase OS=Emericella nidulans (strain FGSC A4 / ATCC 38163 / CBS 112.46 / NRRL 194 / M139) GN=stcU PE=3 SV=2	GO:0016491,GO:0055114	2	0	0	0	22	87	0.384	0	0	0	2.805	11.408	5.1544	1.26128	4.36486e-05	0.000392946
MSTRG.3370	MSTRG.3370.1	1284	ang:ANI_1_478054	46.36	An06g01160; protein kinase domain-containing protein	Hs4507221	44.87	[T] KOG1290 Serine/threonine protein kinase	gi|672375955|gb|KFG78262.1|	73.04	CMGC/SRPK protein kinase [Metarhizium anisopliae]	sp|O54781|SRPK2_MOUSE	44.87	SRSF protein kinase 2 OS=Mus musculus GN=Srpk2 PE=1 SV=2	GO:0004674,GO:0005524,GO:0006468,GO:0009069	8	1	24	2	99	377	1.242	0.138	2.542	0.272	8.54	32.812	5.22716	3.2694	6.4861e-08	1.41975e-06
MSTRG.3757	rna2873-EQL01406.1	1498	pcs:Pc22g19240	53.58	Pc22g19240	At1g34540	27.22	[QI] KOG0157 Cytochrome P450 CYP4/CYP19/CYP26 subfamilies	gi|531864327|gb|EQL01406.1|	100	cytochrome P450 52A12 [Ophiocordyceps sinensis CO18]	sp|P30607|CP52B_CANTR	46.42	Cytochrome P450 52A2 OS=Candida tropicalis GN=CYP52A2 PE=1 SV=1	GO:0005506,GO:0006118,GO:0016712,GO:0020037,GO:0055114	1	1	1	0	43	93	0.09	0.1	0.083	0	2.764	6.029	5.45593	1.54503	5.99218e-07	1.00088e-05
MSTRG.10163	MSTRG.10163.1	1744	fgr:FG08448.1	73.73	hypothetical protein	SPAC31A2.12	37.01	[R] KOG3780 Thioredoxin binding protein TBP-2/VDUP1	gi|531855249|gb|EQK97632.1|	100	arrestin domain-containing protein [Ophiocordyceps sinensis CO18]	sp|Q2UM46|CRED_ASPOR	44.4	Probable HECT-type ubiquitin ligase-interacting protein creD OS=Aspergillus oryzae (strain ATCC 42149 / RIB 40) GN=creD PE=3 SV=2	GO:0008152,GO:0016874	47	40	216	118	4918	1957	3.952	4.026	15.966	11.643	291.718	117.328	5.80219	7.06019	4.97875e-22	1.46093e-19
MSTRG.2416	MSTRG.2416.1	5137	ncr:NCU08056	62.73	similar to ABC drug exporter AtrF	YDR011w	36.97	[Q] KOG0065 Pleiotropic drug resistance proteins (PDR1-15), ABC superfamily	gi|531865515|gb|EQL02410.1|	96.7	ABC drug exporter AtrF [Ophiocordyceps sinensis CO18]	sp|Q8T675|ABCGJ_DICDI	38.57	ABC transporter G family member 19 OS=Dictyostelium discoideum GN=abcG19 PE=3 SV=1	GO:0005524,GO:0006200,GO:0016021,GO:0042626,GO:0055085	9	19	40	44	276	2068	0.565	1.304	1.67	2.017	8.582	88.58	5.87162	5.52593	1.91076e-10	7.85799e-09
MSTRG.1711	rna1367-EQL02903.1	617	cci:CC1G_02824	70.83	metalloprotease	-	-	-	gi|531866063|gb|EQL02903.1|	100	metalloprotease 1 [Ophiocordyceps sinensis CO18]	sp|E4USP0|MEP8_ARTGP	54.84	Extracellular metalloprotease MGYG_03559 OS=Arthroderma gypseum (strain ATCC MYA-4604 / CBS 118893) GN=MGYG_03559 PE=3 SV=1	GO:0006508,GO:0008237	0	1.45	13.02	16.73	66.55	64.99	0	0.652	4.444	7.441	18.757	18.551	6.27401	1.49045	5.20115e-08	1.17399e-06
MSTRG.1475	rna1193-EQL03094.1	1387	pan:PODANSg8228	45.35	hypothetical protein	-	-	-	gi|531866273|gb|EQL03094.1|	100	serum paraoxonase/arylesterase family protein [Ophiocordyceps sinensis CO18]	sp|P52430|PON1_MOUSE	34.4	Serum paraoxonase/arylesterase 1 OS=Mus musculus GN=Pon1 PE=1 SV=2	GO:0004064,GO:0008152	25	10	78	9	2243	1977	2.518	1.091	6.726	1.003	157.155	139.68	6.42263	6.3532	1.05414e-30	1.4306e-27
MSTRG.10421	MSTRG.10421.1	987	mgr:MGG_06973	54.49	MG06973.4; hypothetical protein	At1g69500	32.46	[QI] KOG0157 Cytochrome P450 CYP4/CYP19/CYP26 subfamilies	gi|629700661|ref|XP_007815622.1|	62.67	cytochrome P450 alkane hydroxylase [Metarhizium acridum CQMa 102]	sp|P16496|CP52C_CANMA	36.36	Cytochrome P450 52A3-A OS=Candida maltosa GN=CYP52A3-A PE=1 SV=3	GO:0004497,GO:0005506,GO:0016705,GO:0020037,GO:0055114	1	0	66	11	121	28	0.158	0	8.776	1.902	13.114	3.063	6.45514	1.64331	4.9527e-07	8.52163e-06
MSTRG.9822	MSTRG.9822.1	763	ure:UREG_05476	43	hypothetical protein	-	-	-	gi|531856250|gb|EQK97765.1|	100	phosphotransferase family protein [Ophiocordyceps sinensis CO18]	-	-	-	GO:0005524,GO:0008152,GO:0016773,GO:0046677	1.69	0	5.38	5.72	156.46	131.04	0.474	0	1.29	1.787	30.775	26.063	6.53598	2.53718	2.60018e-11	1.25467e-09
MSTRG.577	rna475-EQL03791.1	1053	sus:Acid_4084	54.21	acetamidase/formamidase	-	-	-	gi|531867016|gb|EQL03791.1|	100	acetamidase/formamidase [Ophiocordyceps sinensis CO18]	sp|Q9URY7|FMDA_SCHPO	25.36	Putative formamidase C869.04 OS=Schizosaccharomyces pombe (strain 972 / ATCC 24843) GN=SPAC869.04 PE=3 SV=1	GO:0006807,GO:0016811	2	0	2	2	200	143	0.271	0	0.232	0.303	18.716	13.505	6.79182	2.78071	2.46623e-12	1.43956e-10
MSTRG.3348	rna2569-EQL01717.1	1010	pcs:Pc16g04540	52.48	Pc16g04540	Hs6601590	43.01	[R] KOG0510 Ankyrin repeat protein	gi|531864697|gb|EQL01717.1|	100	Ankyrin repeat-containing domain protein [Ophiocordyceps sinensis CO18]	sp|Q9D2X0|ANR39_MOUSE	40	Ankyrin repeat domain-containing protein 39 OS=Mus musculus GN=Ankrd39 PE=2 SV=1	GO:0003700,GO:0005667,GO:0006355,GO:0043565,GO:0045449	6	5	123	135	1171	1029	0.96	0.865	16.718	23.84	129.766	115.091	7.12169	5.4118	1.16651e-28	1.15135e-25
MSTRG.363	MSTRG.363.1	2160	afv:AFLA_037670	42.39	oxidase, putative	-	-	-	gi|531867220|gb|EQL03987.1|	84.72	oxidase [Ophiocordyceps sinensis CO18]	-	-	-	GO:0004601,GO:0006804,GO:0006979,GO:0055114	0	0	0	0	36	15	0	0	0	0	1.801	0.755	7.44995	0.275121	1.92828e-05	0.000194748
MSTRG.5167	MSTRG.5167.1	1054	yli:YALI0E17347g	28.5	YALI0E17347p; K04713 C4-hydroxylase [EC:1.14.-.-]	YDR297w	37.1	[I] KOG0874 Sphingolipid hydroxylase	gi|531863055|gb|EQL00447.1|	89.89	C4-hydroxylase [Ophiocordyceps sinensis CO18]	sp|P38992|SUR2_YEAST	37.1	Sphingolipid C4-hydroxylase SUR2 OS=Saccharomyces cerevisiae (strain ATCC 204508 / S288c) GN=SUR2 PE=1 SV=1	GO:0005506,GO:0006633,GO:0016021,GO:0016491,GO:0055114	3	1	5	11	1361	75	0.429	0.151	0.659	1.85	145.743	8.021	7.92086	4.78791	1.21058e-09	4.18574e-08
MSTRG.5685	MSTRG.5685.1	676	fgr:FG01254.1	75	hypothetical protein; K07055	YHR070w	49.15	[A] KOG2078 tRNA modification enzyme	gi|531862368|gb|EQL00082.1|	100	tRNA (guanine) methyltransferase Trm5 [Ophiocordyceps sinensis CO18]	sp|C7YK87|TRM5_NECH7	77.68	tRNA (guanine(37)-N1)-methyltransferase OS=Nectria haematococca (strain 77-13-4 / ATCC MYA-4622 / FGSC 9596 / MPVI) GN=TRM5 PE=3 SV=1	GO:0005634,GO:0005759,GO:0030488,GO:0052906	0	0	0	0	63	24	0	0	0	0	22.791	8.337	8.21648	0.933391	5.62015e-07	9.46015e-06
MSTRG.833	rna693-EQL03614.1	1863	ddi:DDB_G0291301	41.46	amine oxidase	CE18635	56.1	[H] KOG0685 Flavin-containing amine oxidase	gi|531866829|gb|EQL03614.1|	100	amine oxidase (flavin-containing) [Ophiocordyceps sinensis CO18]	sp|Q54EW2|Y9130_DICDI	41.46	Putative bifunctional amine oxidase DDB_G0291301 OS=Dictyostelium discoideum GN=DDB_G0291301 PE=1 SV=1	GO:0016491,GO:0055114	2	0	2	0	135	1272	0.147	0	0.13	0	6.889	65.421	8.84283	4.77474	3.63934e-12	2.07959e-10
MSTRG.10613	rna6811-EQK97475.1	739	ang:ANI_1_1568134	43.28	An15g05110; cytochrome P450 monooxygenase	At2g42250	36.56	[Q] KOG0156 Cytochrome P450 CYP2 subfamily	gi|531853598|gb|EQK97475.1|	88.27	cytochrome P450 [Ophiocordyceps sinensis CO18]	sp|A1DA65|FTMG_NEOFI	38.41	Fumitremorgin C monooxygenase OS=Neosartorya fischeri (strain ATCC 1020 / DSM 3700 / FGSC A1164 / NRRL 181) GN=ftmP450-3 PE=3 SV=1	GO:0004497,GO:0005506,GO:0016705,GO:0020037,GO:0055114	1	0	43	39	996	818	0.237	0	8.804	10.389	166.965	138.583	10.0593	5.12627	8.77463e-31	1.36095e-27
MSTRG.5168	MSTRG.5168.1	1517	bfu:BC1G_07290	49.11	hypothetical protein	At1g63380	29.81	[R] KOG0725 Reductases with broad range of substrate specificities	gi|531863056|gb|EQL00448.1|	86.98	gluconate 5-dehydrogenase [Ophiocordyceps sinensis CO18]	sp|Q9RPT1|RHLG_PSEAE	31.79	Rhamnolipids biosynthesis 3-oxoacyl-[acyl-carrier-protein] reductase OS=Pseudomonas aeruginosa (strain ATCC 15692 / PAO1 / 1C / PRS 101 / LMG 12228) GN=rhlG PE=1 SV=1	GO:0016491,GO:0055114	0	1	35	10	2207	228	0	0.188	3.869	1.693	205.808	19.64	10.4656	5.53977	2.11134e-15	2.02857e-13
MSTRG.5121	MSTRG.5121.1	1517	mgr:MGG_08976	52.22	MG08976.4; hypothetical protein	YGL037c	36.41	[V] KOG4003 Pyrazinamidase/nicotinamidase PNC1	gi|531863106|gb|EQL00488.1|	93.33	nicotinamidase [Ophiocordyceps sinensis CO18]	sp|P53184|PNC1_YEAST	36.41	Nicotinamidase OS=Saccharomyces cerevisiae (strain ATCC 204508 / S288c) GN=PNC1 PE=1 SV=1	GO:0003824,GO:0008152	0	0	1	0	291	188	0	0	0.139	0	30.12	20.824	10.6758	3.23501	2.98744e-16	3.21135e-14
MSTRG.5177	rna3841-EQL00452.1	799	nfi:NFIA_023150	55.21	hypothetical protein	7300387	38.02	[Q] KOG1208 Dehydrogenases with different specificities (related to short-chain alcohol dehydrogenases)	gi|531863060|gb|EQL00452.1|	95.11	NAD(P)-binding domain protein [Ophiocordyceps sinensis CO18]	sp|Q8NBN7|RDH13_HUMAN	43.01	Retinol dehydrogenase 13 OS=Homo sapiens GN=RDH13 PE=1 SV=2	GO:0016491,GO:0055114	0	0	0	3	495	8	0	0	0	0.69	71.643	1.167	10.7377	3.29564	5.67767e-07	9.54218e-06
MSTRG.5169	MSTRG.5169.1	1128	pno:SNOG_01397	49.62	hypothetical protein	At1g63380	27.35	[R] KOG0725 Reductases with broad range of substrate specificities	gi|531863057|gb|EQL00449.1|	90.4	short chain dehydrogenase/reductase [Ophiocordyceps sinensis CO18]	sp|Q9RPT1|RHLG_PSEAE	30.99	Rhamnolipids biosynthesis 3-oxoacyl-[acyl-carrier-protein] reductase OS=Pseudomonas aeruginosa (strain ATCC 15692 / PAO1 / 1C / PRS 101 / LMG 12228) GN=rhlG PE=1 SV=1	GO:0016491,GO:0055114	0	1	8	5	2794	378	0	0.188	1.141	0.941	325.199	44.343	10.8486	5.91949	1.12226e-18	1.84612e-16
MSTRG.4675	rna3486-EQL00799.1	1968	fgr:FG11236.1	61.24	hypothetical protein; K01114 phospholipase C [EC:3.1.4.3]	-	-	-	gi|531863527|gb|EQL00799.1|	100	extracellular phospholipase C [Ophiocordyceps sinensis CO18]	sp|P15713|PHLN_PSEAE	32.86	Non-hemolytic phospholipase C OS=Pseudomonas aeruginosa (strain ATCC 15692 / PAO1 / 1C / PRS 101 / LMG 12228) GN=plcN PE=3 SV=2	GO:0008152,GO:0016788	0	0	0	0	416	454	0	0	0	0	19.994	21.991	11.5392	4.07943	6.8718e-23	2.26082e-20

## Sheet: DF_vs_CM
Supplemental information 4-1. Differentially expressed genes involved in enriched GO terms in FB vs. DF with log2FC | ≥2, p < 0.001.																						Supplemetnal information 4-3.DEGs involved in enriched GO terms in DF vs.CM with log2FC | ≥2, FDR < 0.001.
Table S3. FB vs DF, Differentially expressed genes involved in enriched GO terms between different growth stages ,|log2FC | ≥2, p < 0.001
Gene_ID	representative_transcript_id	representative_transcript_length	KEGG_accession	KEGG_identity	KEGG_description	KOG_accession	KOG_identity	KOG_description	NR_accession	NR_identity	NR_description	SwissProt_accession	SwissProt_identity	SwissProt_description	GO	count_FB-1	count_FB-2	count_DF-1	count_DF-2	count_CM-1	count_CM-2	TMM_FB-1	TMM_FB-2	TMM_DF-1	TMM_DF-2	TMM_CM-1	TMM_CM-2	DF_vs_CM_logFC	DF_vs_CM_logCPM	DF_vs_CM_PValue	DF_vs_CM_FDR
MSTRG.2384	MSTRG.2384.1	1627	fgr:FG00469.1	85.44	hypothetical protein	SPCC4G3.08	57.37	[RT] KOG0598 Ribosomal protein S6 kinase and related proteins	gi|666407383|gb|KEY72580.1|	87.13	hypothetical protein S7711_05649 [Stachybotrys chartarum IBT 7711]	sp|Q12706|PSK1_SCHPO	57.37	Serine/threonine-protein kinase psk1 OS=Schizosaccharomyces pombe (strain 972 / ATCC 24843) GN=psk1 PE=3 SV=1	GO:0004674,GO:0005524,GO:0006468,GO:0009069	0	128.48	1040.89	1491.5	0	0	0	11.2	71.575	133.129	0	0	-13.6213	6.14296	2.73926e-31	1.4944e-27
MSTRG.9491	MSTRG.9491.1	2722	fgr:FG08466.1	61.94	hypothetical protein	At1g63440	29.72	[P] KOG0207 Cation transport ATPase	gi|594723012|gb|EXV05898.1|	67.16	copper-(or silver)-translocating P-type ATPase [Metarhizium robertsii]	sp|Q8CN02|COPA_STAES	29.72	Copper-exporting P-type ATPase A OS=Staphylococcus epidermidis (strain ATCC 12228) GN=copA PE=3 SV=1	GO:0005524,GO:0008152,GO:0016021,GO:0019829,GO:0030001,GO:0046872,GO:0098655	616.18	271.27	562.73	433.05	0	0	30.586	14.649	24.029	23.996	0	0	-12.2102	4.735	3.82794e-24	6.96111e-21
MSTRG.9968	MSTRG.9968.1	2789	fgr:FG08532.1	82.44	hypothetical protein; K03235 elongation factor 3	YPL226w_2	68.38	[EJ] KOG0062 ATPase component of ABC transporters with duplicated ATPase domains/Translation elongation factor EF-3b	gi|629694293|ref|XP_007812438.1|	86.15	elongation factor 3 [Metarhizium acridum CQMa 102]	sp|Q08972|NEW1_YEAST	48.29	[NU+] prion formation protein 1 OS=Saccharomyces cerevisiae (strain ATCC 204508 / S288c) GN=NEW1 PE=1 SV=1	GO:0003746,GO:0005524,GO:0005634,GO:0005739,GO:0005840,GO:0005844,GO:0006200,GO:0006448,GO:0016887,GO:0042274	207.99	643.94	5000.73	18676.4	263.53	0	9.168	30.853	189.631	919.008	8.101	0	-7.09425	9.45685	4.26878e-05	0.000481164
MSTRG.10037	MSTRG.10037.1	3287	fgr:FG06330.1	82.84	MSH2_NEUCR DNA mismatch repair protein MSH2; K08735 DNA mismatch repair protein MSH2	YOL090w	44.43	[L] KOG0219 Mismatch repair ATPase MSH2 (MutS family)	gi|594723418|gb|EXV06304.1|	84.89	mismatch repair ATPase (MutS family) [Metarhizium robertsii]	sp|O13396|MSH2_NEUCR	78.14	DNA mismatch repair protein msh-2 OS=Neurospora crassa (strain ATCC 24698 / 74-OR23-1A / CBS 708.71 / DSM 1257 / FGSC 987) GN=msh-2 PE=3 SV=1	GO:0000228,GO:0000400,GO:0000403,GO:0000404,GO:0000406,GO:0000710,GO:0000735,GO:0005524,GO:0006200,GO:0006311,GO:0016887,GO:0030466,GO:0032137,GO:0032138,GO:0032301,GO:0032302	23.24	27.21	189.97	268.89	8.73	6.86	0.881	1.116	6.169	11.34	0.232	0.184	-5.34015	3.71888	5.91889e-11	5.42698e-09
MSTRG.4516	MSTRG.4516.1	2937	ncr:NCU02741	73.3	DNA repair protein RAD51; K04482 DNA repair protein RAD51	SPAC644.14c	83.97	[L] KOG1433 DNA repair protein RAD51/RHP55	gi|531863656|gb|EQL00901.1|	78.33	DNA repair protein RAD51 [Ophiocordyceps sinensis CO18]	sp|P36601|RAD51_SCHPO	83.97	DNA repair protein rhp51 OS=Schizosaccharomyces pombe (strain 972 / ATCC 24843) GN=rhp51 PE=1 SV=1	GO:0003684,GO:0005524,GO:0006200,GO:0006281,GO:0008094	230251	185087	318178	75762.3	6243.76	6993.72	44669.6	38590.9	55123	16890.6	718.598	815.604	-5.24682	13.2866	5.1727e-13	8.81864e-11
MSTRG.502	rna409-EQL03861.1	729	fgr:FG02470.1	65.1	hypothetical protein; K02542 minichromosome maintenance protein 6	SPBC211.04c	33.14	[L] KOG0480 DNA replication licensing factor, MCM6 component	gi|531867089|gb|EQL03861.1|	90.91	DNA replication licensing factor mcm6 [Ophiocordyceps sinensis CO18]	sp|P49731|MCM6_SCHPO	33.14	DNA replication licensing factor mcm6 OS=Schizosaccharomyces pombe (strain 972 / ATCC 24843) GN=mcm6 PE=1 SV=2	GO:0003677,GO:0003678,GO:0005524,GO:0005634,GO:0005657,GO:0006270,GO:0032508,GO:0042555	38	32	366	591	33	23	9.326	8.591	76.39	160.376	5.636	3.975	-4.62458	4.80971	6.9081e-11	6.22928e-09
MSTRG.10779	MSTRG.10779.1	1875	pan:PODANSg5281	81.16	hypothetical protein	SPBC16D10.08c	60.93	[O] KOG1051 Chaperone HSP104 and related ATP-dependent Clp proteases	gi|632918532|gb|KDB17961.1|	88.85	heat shock protein 101 [Villosiclava virens]	sp|P31540|HSP98_NEUCR	78.54	Heat shock protein hsp98 OS=Neurospora crassa (strain ATCC 24698 / 74-OR23-1A / CBS 708.71 / DSM 1257 / FGSC 987) GN=hsp98 PE=1 SV=2	GO:0005524,GO:0019538	20457.5	9792.5	15533	4244	693	343	1395.13	726.54	910.088	322.748	32.95	16.437	-4.61776	9.00127	1.14153e-10	9.57376e-09
MSTRG.10780	MSTRG.10780.1	1875	pan:PODANSg5281	81.16	hypothetical protein	SPBC16D10.08c	60.93	[O] KOG1051 Chaperone HSP104 and related ATP-dependent Clp proteases	gi|632918532|gb|KDB17961.1|	88.85	heat shock protein 101 [Villosiclava virens]	sp|P31540|HSP98_NEUCR	78.54	Heat shock protein hsp98 OS=Neurospora crassa (strain ATCC 24698 / 74-OR23-1A / CBS 708.71 / DSM 1257 / FGSC 987) GN=hsp98 PE=1 SV=2	GO:0005524,GO:0019538	20457.5	9792.5	15533	4244	693	343	1395.13	726.54	910.088	322.748	32.95	16.437	-4.61776	9.00127	1.14945e-10	9.57376e-09
MSTRG.6184	MSTRG.6184.1	5366	fgr:FG00838.1	95.9	HS70_NEUCR Heat shock 70 kDa protein (HSP70); K03283 heat shock 70kDa protein 1/8	SPCC1739.13	79.02	[O] KOG0101 Molecular chaperones HSP70/HSC70, HSP70 superfamily	gi|531861881|gb|EQK99789.1|	100	heat shock protein 70-2 [Ophiocordyceps sinensis CO18]	sp|Q01233|HSP70_NEUCR	92.3	Heat shock 70 kDa protein OS=Neurospora crassa (strain ATCC 24698 / 74-OR23-1A / CBS 708.71 / DSM 1257 / FGSC 987) GN=hsps-1 PE=2 SV=2	GO:0005524	317911	318256	429665	146371	17090.7	16626	19020.9	20484.7	22187.4	9835.42	707.227	673.669	-4.47492	13.8892	3.49625e-12	4.54138e-10
MSTRG.9998	MSTRG.9998.1	3098	fgr:FG07549.1	75.11	hypothetical protein; K08737 DNA mismatch repair protein MSH6	SPCC285.16c	47.06	[L] KOG0217 Mismatch repair ATPase MSH6 (MutS family)	gi|629686799|ref|XP_007808695.1|	68.19	DNA mismatch repair protein msh6 [Metarhizium acridum CQMa 102]	sp|O74502|MSH6_SCHPO	47.06	DNA mismatch repair protein msh6 OS=Schizosaccharomyces pombe (strain 972 / ATCC 24843) GN=msh6 PE=1 SV=1	GO:0005524,GO:0006298,GO:0030983	359	230	2629.88	4572.96	260	217	15.242	10.748	95.585	218.486	7.719	6.459	-4.46002	7.73267	3.15195e-12	4.19401e-10
MSTRG.6183	MSTRG.6183.1	3273	fgr:FG00838.1	95.9	HS70_NEUCR Heat shock 70 kDa protein (HSP70); K03283 heat shock 70kDa protein 1/8	SPCC1739.13	79.02	[O] KOG0101 Molecular chaperones HSP70/HSC70, HSP70 superfamily	gi|531861881|gb|EQK99789.1|	100	heat shock protein 70-2 [Ophiocordyceps sinensis CO18]	sp|Q01233|HSP70_NEUCR	92.3	Heat shock 70 kDa protein OS=Neurospora crassa (strain ATCC 24698 / 74-OR23-1A / CBS 708.71 / DSM 1257 / FGSC 987) GN=hsps-1 PE=2 SV=2	GO:0005524	37835.8	35469.7	60210.5	19812.3	3306.32	2338.99	8554.11	8755.89	11568.3	4945.2	495.501	313.145	-4.20323	11.0514	1.11018e-10	9.39008e-09
MSTRG.1872	MSTRG.1872.2	2354	fgr:FG07115.1	71.4	hypothetical protein; K06676 condensin complex subunit 2	SPCC306.03c	62.5	[BD] KOG2328 Chromosome condensation complex Condensin, subunit H	gi|531865949|gb|EQL02797.1|	100	condensin complex component cnd2 [Ophiocordyceps sinensis CO18]	sp|Q9Y7R3|CND2_SCHPO	62.5	Condensin complex subunit 2 OS=Schizosaccharomyces pombe (strain 972 / ATCC 24843) GN=cnd2 PE=1 SV=1	GO:0000796,GO:0007076,GO:0051301	643	379	3687	3791	313	268	39.889	25.823	196.44	269.007	13.794	11.952	-4.17672	7.7474	4.43458e-13	7.80414e-11
MSTRG.507	rna408-EQL03860.1	1944	fgr:FG02470.1	79.08	hypothetical protein; K02542 minichromosome maintenance protein 6	SPBC211.04c	59.6	[L] KOG0480 DNA replication licensing factor, MCM6 component	gi|531867088|gb|EQL03860.1|	96.45	DNA replication licensing factor mcm6 [Ophiocordyceps sinensis CO18]	sp|P49731|MCM6_SCHPO	59.6	DNA replication licensing factor mcm6 OS=Schizosaccharomyces pombe (strain 972 / ATCC 24843) GN=mcm6 PE=1 SV=2	GO:0000727,GO:0003688,GO:0005524,GO:0005656,GO:0005737,GO:0006200,GO:0006267,GO:0006268,GO:0006270,GO:0006271,GO:0009378,GO:0009379,GO:0031261,GO:0031298,GO:0042555,GO:0043140,GO:0043142,GO:0046809	284	314	1388	2437	176	156	19.363	23.302	81.326	185.334	8.366	7.477	-4.07	6.84015	3.00066e-11	3.27402e-09
MSTRG.11221	rna6962-EQK97324.1	621	mgr:MGG_06459	78.24	MG06459.4; hypothetical protein	SPBC16D10.08c	60.82	[O] KOG1051 Chaperone HSP104 and related ATP-dependent Clp proteases	gi|531850098|gb|EQK97324.1|	100	heat shock protein 101 [Ophiocordyceps sinensis CO18]	sp|P31540|HSP98_NEUCR	76.61	Heat shock protein hsp98 OS=Neurospora crassa (strain ATCC 24698 / 74-OR23-1A / CBS 708.71 / DSM 1257 / FGSC 987) GN=hsp98 PE=1 SV=2	GO:0005524	16477.9	11601.7	7836.13	2320.86	448.06	333.17	4513.58	3477.97	1821.28	701.516	85.379	64.193	-4.06972	8.07253	2.75483e-10	1.97749e-08
MSTRG.1871	MSTRG.1871.1	1646	mgr:MGG_01639	55.11	MG01639.4; hypothetical protein; K06676 condensin complex subunit 2	YBL097w	33.82	[BD] KOG2328 Chromosome condensation complex Condensin, subunit H	gi|531865948|gb|EQL02796.1|	85.8	condensin complex component cnd2 [Ophiocordyceps sinensis CO18]	sp|P38170|CND2_YEAST	33.82	Condensin complex subunit 2 OS=Saccharomyces cerevisiae (strain ATCC 204508 / S288c) GN=BRN1 PE=1 SV=3	GO:0000796,GO:0007076	396.82	221.51	1418.23	1719.42	94.15	190.63	97.007	63.285	302.435	466.068	15.471	31.829	-3.96595	6.52385	8.76481e-11	7.58991e-09
MSTRG.11220	MSTRG.11220.2	773	mgr:MGG_06459	76.58	MG06459.4; hypothetical protein	SPBC16D10.08c	59.75	[O] KOG1051 Chaperone HSP104 and related ATP-dependent Clp proteases	gi|531850098|gb|EQK97324.1|	100	heat shock protein 101 [Ophiocordyceps sinensis CO18]	sp|P31540|HSP98_NEUCR	74.84	Heat shock protein hsp98 OS=Neurospora crassa (strain ATCC 24698 / 74-OR23-1A / CBS 708.71 / DSM 1257 / FGSC 987) GN=hsp98 PE=1 SV=2	GO:0005524	3927.06	2935.27	2152.87	624.14	87.94	142.83	1297.5	1061.49	599.415	225.153	20.019	33.049	-3.95234	6.2087	1.43912e-09	8.26433e-08
MSTRG.5053	MSTRG.5053.1	3032	fgr:FG01425.1	86.14	PMA1_NEUCR Plasma membrane ATPase (Proton pump); K01535 H+-transporting ATPase [EC:3.6.3.6]	YGL008c	75.79	[P] KOG0205 Plasma membrane H+-transporting ATPase	gi|590045136|gb|EXK46994.1|	85.79	plasma membrane ATPase [Fusarium oxysporum f. sp. melonis 26406]	sp|P07038|PMA1_NEUCR	83.51	Plasma membrane ATPase OS=Neurospora crassa (strain ATCC 24698 / 74-OR23-1A / CBS 708.71 / DSM 1257 / FGSC 987) GN=pma-1 PE=1 SV=1	GO:0005524,GO:0006200,GO:0006754,GO:0016021,GO:0019829,GO:0046872,GO:0098655	9100.28	9240.52	80933.2	65099.3	8539.52	4912.82	502.06	554.907	3811.82	3980.08	326.901	190.358	-3.90633	12.0238	1.00931e-10	8.60357e-09
MSTRG.2515	MSTRG.2515.1	14956	fgr:FG07258.1	70.78	hypothetical protein; K14572 midasin	YLR106c	46.02	[R] KOG1808 AAA ATPase containing von Willebrand factor type A (vWA) domain	gi|531865422|gb|EQL02325.1|	99.76	ATPase, AAA-5 [Ophiocordyceps sinensis CO18]	sp|Q12019|MDN1_YEAST	46.02	Midasin OS=Saccharomyces cerevisiae (strain ATCC 204508 / S288c) GN=MDN1 PE=1 SV=1	GO:0005524,GO:0005634,GO:0006200,GO:0006461,GO:0016887	2289	3117	9138	5318	551	875	17.794	26.312	61.259	46.247	2.988	4.783	-3.77179	8.66254	1.85518e-10	1.44585e-08
MSTRG.3961	MSTRG.3961.1	2465	fgr:FG09795.1	68.27	hypothetical protein; K14569 ribosome biogenesis protein BMS1	SPBC31E1.06	39.84	[J] KOG1951 GTP-binding protein AARP2 involved in 40S ribosome biogenesis	gi|322707405|gb|EFY98983.1|	72.13	ribosome biogenesis protein (Bms1) [Metarhizium anisopliae ARSEF 23]	sp|O94653|BMS1_SCHPO	39.84	Ribosome biogenesis protein bms1 OS=Schizosaccharomyces pombe (strain 972 / ATCC 24843) GN=bms1 PE=1 SV=2	GO:0003924,GO:0005525,GO:0005634,GO:0005739,GO:0006184,GO:0006364,GO:0030686,GO:0034511,GO:0042255	477	640	1909	2757	291	247	25.392	37.061	87.403	163.814	10.806	9.241	-3.64202	7.13564	6.41404e-10	4.13092e-08
MSTRG.348	rna277-EQL04031.1	2876	ncr:NCU07058	47.79	hypothetical protein; K14567 U3 small nucleolar RNA-associated protein 14	YML093w	40.46	[S] KOG2172 Uncharacterized conserved protein	gi|531867265|gb|EQL04031.1|	97.25	Utp14 protein [Ophiocordyceps sinensis CO18]	sp|Q04500|UTP14_YEAST	40.46	U3 small nucleolar RNA-associated protein 14 OS=Saccharomyces cerevisiae (strain ATCC 204508 / S288c) GN=UTP14 PE=1 SV=1	GO:0006364,GO:0032040	752	1286	2475	2836	326	304	33.476	62.244	94.806	140.968	10.126	9.513	-3.57746	7.30371	4.19567e-10	2.82586e-08
MSTRG.9967	MSTRG.9967.1	5090	fgr:FG08532.1	82.5	hypothetical protein; K03235 elongation factor 3	YPL226w_2	67.86	[EJ] KOG0062 ATPase component of ABC transporters with duplicated ATPase domains/Translation elongation factor EF-3b	gi|629694293|ref|XP_007812438.1|	85.58	elongation factor 3 [Metarhizium acridum CQMa 102]	sp|Q08972|NEW1_YEAST	50.94	[NU+] prion formation protein 1 OS=Saccharomyces cerevisiae (strain ATCC 204508 / S288c) GN=NEW1 PE=1 SV=1	GO:0003746,GO:0005524,GO:0005634,GO:0005739,GO:0005840,GO:0005844,GO:0006200,GO:0006448,GO:0016887,GO:0042274	2122.01	3997.06	4091.27	11692.6	1025.47	1035	50.626	103.569	84.035	311.67	17.048	17.349	-3.5241	8.96282	4.87741e-07	1.22339e-05
MSTRG.7017	rna5031-EQK99255.1	871	pan:PODANSg1954	86.6	hypothetical protein; K08737 DNA mismatch repair protein MSH6	YDR097c	54.87	[L] KOG0217 Mismatch repair ATPase MSH6 (MutS family)	gi|531860969|gb|EQK99255.1|	95.8	DNA mismatch repair protein msh6 [Ophiocordyceps sinensis CO18]	sp|Q03834|MSH6_YEAST	54.87	DNA mismatch repair protein MSH6 OS=Saccharomyces cerevisiae (strain ATCC 204508 / S288c) GN=MSH6 PE=1 SV=1	GO:0005524,GO:0006298,GO:0022402,GO:0030983,GO:0050794,GO:1902589	190	119	1073	1721	120	237	36.874	25.221	177.551	370.082	16.218	32.338	-3.50223	6.41738	2.08143e-08	8.80251e-07
MSTRG.10423	MSTRG.10423.1	1909	pan:PODANSg9150	84.84	hypothetical protein; K02540 minichromosome maintenance protein 2	SPBC4.04c	60.84	[L] KOG0477 DNA replication licensing factor, MCM2 component	gi|629684509|ref|XP_007807550.1|	84.12	DNA replication licensing factor mcm2 [Metarhizium acridum CQMa 102]	sp|P40377|MCM2_SCHPO	60.84	DNA replication licensing factor mcm2 OS=Schizosaccharomyces pombe (strain 972 / ATCC 24843) GN=mcm2 PE=1 SV=1	GO:0000727,GO:0000785,GO:0003678,GO:0003682,GO:0003688,GO:0003697,GO:0005524,GO:0005656,GO:0005737,GO:0006267,GO:0006270,GO:0006271,GO:0031261,GO:0031298,GO:0032508,GO:0042555,GO:0046809	287	200	1506	2290	328	171	19.905	15.088	89.741	177.109	15.861	8.337	-3.4587	6.85761	1.16571e-08	5.27761e-07
MSTRG.11085	MSTRG.11085.1	1343	fgr:FG05687.1	79.58	hypothetical protein; K14776 ATP-dependent RNA helicase DDX10/DBP4 [EC:3.6.4.13]	SPAC1093.05	50.47	[A] KOG0343 RNA Helicase	gi|672794737|gb|KFH45304.1|	80.61	ATP-dependent RNA helicase-like protein [Acremonium chrysogenum ATCC 11550]	sp|Q4IAS1|DBP4_GIBZE	79.58	ATP-dependent RNA helicase DBP4 OS=Gibberella zeae (strain PH-1 / ATCC MYA-4620 / FGSC 9075 / NRRL 31084) GN=DBP4 PE=3 SV=1	GO:0003723,GO:0005524,GO:0006200,GO:0008026	286	413	577	772	87	98	28.621	45.012	49.523	86.025	6.067	6.898	-3.38191	5.36069	2.61862e-08	1.0701e-06
MSTRG.4382	rna3296-EQL00986.1	5150	fgr:FG06804.1	93.35	hypothetical protein; K11594 ATP-dependent RNA helicase [EC:3.6.4.13]	SPCC1795.11	77.48	[A] KOG0335 ATP-dependent RNA helicase	gi|531863775|gb|EQL00986.1|	93.68	ATP-dependent RNA helicase DED1 [Ophiocordyceps sinensis CO18]	sp|Q4I7K4|DED1_GIBZE	93.35	ATP-dependent RNA helicase DED1 OS=Gibberella zeae (strain PH-1 / ATCC MYA-4620 / FGSC 9075 / NRRL 31084) GN=DED1 PE=3 SV=1	GO:0003676,GO:0005524,GO:0006200,GO:0008026	5816.97	6516	19995	28026	3875	2751	199.704	243.133	590.991	1074.84	92.791	66.352	-3.38115	10.5164	2.39406e-08	9.85312e-07
MSTRG.4722	MSTRG.4722.2	3081	cdu:CD36_71850	72.34	ATP-dependent molecular chaperone, HSP90 family, putative; K04079 molecular chaperone HtpG	YMR186w	76.59	[O] KOG0019 Molecular chaperone (HSP90 family)	gi|531863491|gb|EQL00771.1|	100	heat shock protein 90 [Ophiocordyceps sinensis CO18]	sp|O43109|HSP90_PODAS	88.64	Heat shock protein 90 homolog OS=Podospora anserina GN=MOD-E PE=3 SV=1	GO:0005524,GO:0006457,GO:0006950,GO:0051082	187969	167868	122961	42120.8	11087.8	9754.67	10036.6	9738.31	5563.22	2482.99	405.134	353.389	-3.36652	12.1567	4.18988e-08	1.60971e-06
MSTRG.4314	rna3262-EQL01031.1	3654	fgr:FG06101.1	66.18	hypothetical protein; K14780 ATP-dependent RNA helicase DHX37/DHR1 [EC:3.6.4.13]	SPAPB1A10.06c	39.58	[AJ] KOG0926 DEAH-box RNA helicase	gi|531863831|gb|EQL01031.1|	100	DEAH-box RNA helicase [Ophiocordyceps sinensis CO18]	sp|Q9HDY4|YK16_SCHPO	39.58	Putative ATP-dependent RNA helicase PB1A10.06c OS=Schizosaccharomyces pombe (strain 972 / ATCC 24843) GN=SPAPB1A10.06c PE=3 SV=1	GO:0003676,GO:0005524,GO:0006200,GO:0008026	565	801	1075	1809	233	175	18.652	28.746	30.56	66.721	5.37	4.063	-3.36167	6.47959	1.7285e-08	7.51379e-07
MSTRG.7709	MSTRG.7709.2	3579	fgr:FG04702.1	70.08	hypothetical protein; K00010 myo-inositol 2-dehydrogenase [EC:1.1.1.18]	CE07721	34.84	[P] KOG0203 Na+/K+ ATPase, alpha subunit	gi|531860134|gb|EQK98841.1|	93.64	NAD(P)-binding domain protein [Ophiocordyceps sinensis CO18]	sp|P35317|AT1A_HYDVU	34.3	Sodium/potassium-transporting ATPase subunit alpha OS=Hydra vulgaris PE=2 SV=1	GO:0005524,GO:0016021,GO:0016491,GO:0019829,GO:0046872,GO:0055114,GO:0098655	4033	15834	22129	38770	3791	4948	220.535	970.163	1088.03	2522.02	144.556	187.006	-3.34522	10.8841	9.73719e-08	3.23452e-06
MSTRG.2681	rna2079-EQL02208.1	1749	fgr:FG00534.1	68.89	hypothetical protein	-	-	-	gi|531865288|gb|EQL02208.1|	100	Protein kinase-like domain protein [Ophiocordyceps sinensis CO18]	-	-	-	GO:0004672,GO:0005524,GO:0006468	204.45	39.41	3814.73	2254.77	524.41	284.5	15.084	3.161	241.668	185.417	26.966	14.743	-3.34273	7.44647	9.21126e-09	4.29505e-07
MSTRG.613	MSTRG.613.1	3481	fgr:FG10791.1	88.44	hypothetical protein; K12614 ATP-dependent RNA helicase DDX6/DHH1 [EC:3.6.4.13]	SPBC776.09	80.35	[A] KOG0326 ATP-dependent RNA helicase	gi|672376646|gb|KFG78933.1|	90.83	ATP-dependent RNA helicase DHH1 [Metarhizium anisopliae]	sp|Q4HW67|DHH1_GIBZE	88.44	ATP-dependent RNA helicase DHH1 OS=Gibberella zeae (strain PH-1 / ATCC MYA-4620 / FGSC 9075 / NRRL 31084) GN=DHH1 PE=3 SV=1	GO:0003676,GO:0005524,GO:0006200,GO:0008026	975	1146.85	532.92	352.75	78.09	48.37	33.894	43.332	15.948	13.702	1.892	1.185	-3.25649	4.6951	1.63199e-07	4.9463e-06
MSTRG.10127	MSTRG.10127.1	2730	fgr:FG00504.1	88.22	hypothetical protein; K02212 minichromosome maintenance protein 4 (cell division control protein 54)	YPR019w	69.97	[L] KOG0478 DNA replication licensing factor, MCM4 component	gi|672385536|gb|KFG87623.1|	89.32	cell division control protein 54 [Metarhizium anisopliae]	sp|P29458|MCM4_SCHPO	73.15	DNA replication licensing factor mcm4 OS=Schizosaccharomyces pombe (strain 972 / ATCC 24843) GN=mcm4 PE=1 SV=2	GO:0000727,GO:0003688,GO:0003697,GO:0005524,GO:0005656,GO:0005737,GO:0006200,GO:0006267,GO:0006268,GO:0006270,GO:0006271,GO:0009378,GO:0009379,GO:0031261,GO:0031298,GO:0042555,GO:0043140,GO:0043142,GO:0046809,GO:0051301	351	242	1425	2780	331	341	16.529	12.391	57.733	146.162	10.873	11.285	-3.19948	7.0521	1.41654e-07	4.35376e-06
MSTRG.5267	rna3907-EQL00375.1	3246	fgr:FG05081.1	76.27	hypothetical protein; K14554 U3 small nucleolar RNA-associated protein 21	SPCC1672.07	35.66	[R] KOG1539 WD repeat protein	gi|531862958|gb|EQL00375.1|	99.78	WD repeat containing protein 36 [Ophiocordyceps sinensis CO18]	sp|O14053|UTP21_SCHPO	35.66	U3 small nucleolar RNA-associated protein 21 homolog OS=Schizosaccharomyces pombe (strain 972 / ATCC 24843) GN=SPCC1672.07 PE=3 SV=1	GO:0006364,GO:0032040	1010	1226	1924	2234	365	308	39.494	52.123	64.756	97.574	9.951	8.46	-3.13067	6.99214	9.312e-09	4.32354e-07
MSTRG.5056	MSTRG.5056.1	1080	fgr:FG01425.1	91.09	PMA1_NEUCR Plasma membrane ATPase (Proton pump); K01535 H+-transporting ATPase [EC:3.6.3.6]	SPAC1071.10c	76.92	[P] KOG0205 Plasma membrane H+-transporting ATPase	gi|573992303|ref|XP_006674072.1|	93	Plasma membrane ATPase (Proton pump) [Cordyceps militaris CM01]	sp|P07038|PMA1_NEUCR	87.85	Plasma membrane ATPase OS=Neurospora crassa (strain ATCC 24698 / 74-OR23-1A / CBS 708.71 / DSM 1257 / FGSC 987) GN=pma-1 PE=1 SV=1	GO:0005524,GO:0006200,GO:0006754,GO:0016021,GO:0019829,GO:0046872,GO:0098655	4223.5	6304	27372	22106	3327.69	4640	585.271	952.329	3244.91	3403.78	321.274	451.973	-3.09939	10.529	4.32346e-08	1.64367e-06
MSTRG.1931	MSTRG.1931.1	4957	fgr:FG09515.1	73.81	hypothetical protein; K01537 Ca2+-transporting ATPase [EC:3.6.3.8]	SPAPB2B4.04c	49.85	[P] KOG0204 Calcium transporting ATPase	gi|531865896|gb|EQL02750.1|	100	ATPase, P-type, calcium-transporting, PMCA-type [Ophiocordyceps sinensis CO18]	sp|Q9HDW7|ATC2_SCHPO	49.85	Calcium-transporting ATPase 2 OS=Schizosaccharomyces pombe (strain 972 / ATCC 24843) GN=pmc1 PE=3 SV=1	GO:0005388,GO:0005524,GO:0008152,GO:0016021,GO:0016529,GO:0046872,GO:0070588	6789	6483	22084	21124	3573	3665	173.127	174.769	494.747	621.166	64.14	63.921	-3.06104	10.3555	4.55693e-08	1.70871e-06
MSTRG.10703	rna6838-EQK97448.1	1980	fgr:FG00695.1	79.24	hypothetical protein; K14843 pescadillo	SPBC19F5.05c	50	[A] KOG2481 Protein required for normal rRNA processing	gi|531853177|gb|EQK97448.1|	100	pescadillo [Ophiocordyceps sinensis CO18]	sp|Q2HCV1|PESC_CHAGB	66.82	Pescadillo homolog OS=Chaetomium globosum (strain ATCC 6205 / CBS 148.51 / DSM 1962 / NBRC 6347 / NRRL 1970) GN=NOP7 PE=3 SV=1	GO:0000462,GO:0000463,GO:0000466,GO:0005654,GO:0007049,GO:0030687,GO:0043021,GO:0070545	871	1403	2760	3755	580	556	55.887	97.926	152.178	268.725	25.945	25.063	-3.03957	7.66548	8.72325e-08	2.96787e-06
MSTRG.498	MSTRG.498.1	4855	fgr:FG02460.1	83.65	hypothetical protein; K14950 cation-transporting ATPase 13A1 [EC:3.6.3.-]	YEL031w	57	[P] KOG0209 P-type ATPase	gi|531867138|gb|EQL03909.1|	99.32	cation-transporting ATPase 4 [Ophiocordyceps sinensis CO18]	sp|P39986|ATC6_YEAST	57	Manganese-transporting ATPase 1 OS=Saccharomyces cerevisiae (strain ATCC 204508 / S288c) GN=SPF1 PE=1 SV=1	GO:0005524,GO:0006200,GO:0016021,GO:0019829,GO:0046872,GO:0098655	2449	3325	5270	5189	937	853	63.023	92.984	116.821	149.235	16.824	15.419	-3.03321	8.31535	3.33738e-08	1.31459e-06
MSTRG.2030	MSTRG.2030.1	2982	fgr:FG06154.1	86.64	similar to 70 kDa heat shock protein; K04043 molecular chaperone DnaK	YJR045c	71.93	[O] KOG0102 Molecular chaperones mortalin/PBP74/GRP75, HSP70 superfamily	gi|531865828|gb|EQL02692.1|	93	heat shock 70 kDa protein [Ophiocordyceps sinensis CO18]	sp|Q5B0C0|HSP7M_EMENI	80.03	Heat shock 70 kDa protein OS=Emericella nidulans (strain FGSC A4 / ATCC 38163 / CBS 112.46 / NRRL 194 / M139) GN=AN6010 PE=1 SV=1	GO:0005524,GO:0005739,GO:0006626,GO:0042026,GO:0051082	14147.3	15369.4	22327.5	14403.7	3376.99	2767.51	651.94	737.991	911.146	757.075	107.141	83.183	-3.02168	10.0839	5.49796e-08	2.00629e-06
MSTRG.879	MSTRG.879.1	1015	mgr:MGG_06420	83.49	MG06420.4; similar to serine/threonine protein kinase FSK; K08286 protein-serine/threonine kinase [EC:2.7.11.-]	SPAC29A4.16	64.91	[D] KOG0590 Checkpoint kinase and related serine/threonine protein kinases	gi|590073031|gb|EXL00556.1|	89.82	HAL protein kinase [Fusarium oxysporum f. sp. raphani 54005]	sp|O14019|HAL4_SCHPO	64.91	Serine/threonine-protein kinase hal4 OS=Schizosaccharomyces pombe (strain 972 / ATCC 24843) GN=hal4 PE=1 SV=1	GO:0004674,GO:0005524,GO:0006468,GO:0009069	38.77	0	410.6	1340.19	208.5	157.79	5.453	0	49.393	209.393	20.426	15.594	-2.85332	5.86824	4.64936e-05	0.000515541
MSTRG.7792	rna5495-EQK98791.1	3169	fgr:FG02510.1	77.3	hypothetical protein; K06678 condensin complex subunit 3	SPCC188.03	33.83	[BD] KOG2025 Chromosome condensation complex Condensin, subunit G	gi|531860009|gb|EQK98791.1|	99.78	Armadillo-type fold protein [Ophiocordyceps sinensis CO18]	sp|Q10429|CND3_SCHPO	33.83	Condensin complex subunit 3 OS=Schizosaccharomyces pombe (strain 972 / ATCC 24843) GN=cnd3 PE=1 SV=1	GO:0000796,GO:0007076	390	219	1570	1616	298	322	15.332	9.356	53.113	70.944	8.167	8.89	-2.85177	6.62696	6.33421e-08	2.28849e-06
MSTRG.5699	MSTRG.5699.1	3414	bfu:BC1G_10502	50.94	hypothetical protein ; K14766 nucleolar protein 14	SPBC3F6.04c	31.17	[J] KOG2147 Nucleolar protein involved in 40S ribosome biogenesis	gi|531862361|gb|EQL00077.1|	97.83	nucleolar protein [Ophiocordyceps sinensis CO18]	sp|Q6C2F4|NOP14_YARLI	30.7	Probable nucleolar complex protein 14 OS=Yarrowia lipolytica (strain CLIB 122 / E 150) GN=NOP14 PE=3 SV=1	GO:0032040	1452	1690	2064	2420	515	372	55.673	69.519	68.579	103.688	13.844	10.039	-2.84269	7.13429	3.00441e-07	8.01493e-06
MSTRG.2584	MSTRG.2584.1	5075	ncr:NCU06230	58.4	hypothetical protein	SPBC16E9.13	44.54	[T] KOG0583 Serine/threonine protein kinase	gi|531865356|gb|EQL02267.1|	100	Protein kinase-like domain protein [Ophiocordyceps sinensis CO18]	sp|O14328|KSP1_SCHPO	44.54	Serine/threonine-protein kinase ksp1 OS=Schizosaccharomyces pombe (strain 972 / ATCC 24843) GN=ksp1 PE=1 SV=1	GO:0004674,GO:0005524,GO:0006468,GO:0009069	427.35	407.66	1353.08	948.85	202.33	255.29	25.155	22.65	40.719	33.632	9.329	13.102	-2.7821	6.12706	1.8781e-07	5.56848e-06
MSTRG.2015	rna1594-EQL02682.1	2125	fgr:FG06165.1	77.56	hypothetical protein; K06943 nucleolar GTP-binding protein	YPL093w	68.75	[R] KOG1490 GTP-binding protein CRFG/NOG1 (ODN superfamily)	gi|531865818|gb|EQL02682.1|	99.26	nucleolar GTP-binding protein [Ophiocordyceps sinensis CO18]	sp|Q74ZK6|NOG1_ASHGO	70.31	Nucleolar GTP-binding protein 1 OS=Ashbya gossypii (strain ATCC 10895 / CBS 109.51 / FGSC 9923 / NRRL Y-1056) GN=NOG1 PE=3 SV=1	GO:0000054,GO:0005525,GO:0005730,GO:0006364,GO:0016787,GO:0030687,GO:0042273	1318	2574	4646	4280	923	895	85.434	181.503	258.785	309.423	41.714	40.762	-2.775	8.11018	2.37059e-07	6.77158e-06
MSTRG.4332	MSTRG.4332.1	4598	fgr:FG01015.1	85.84	hypothetical protein; K03695 ATP-dependent Clp protease ATP-binding subunit ClpB	SPBC4F6.17c	64.55	[O] KOG1051 Chaperone HSP104 and related ATP-dependent Clp proteases	gi|531863819|gb|EQL01020.1|	100	heat shock protein 78 [Ophiocordyceps sinensis CO18]	sp|O74402|HSP78_SCHPO	64.55	Heat shock protein 78, mitochondrial OS=Schizosaccharomyces pombe (strain 972 / ATCC 24843) GN=hsp78 PE=3 SV=1	GO:0005524	56495.5	36660	20638.1	3862.86	2363.85	2155.7	2621.46	1740.61	807.415	170.712	59.833	48.406	-2.77423	9.42296	5.13065e-05	0.000555914
MSTRG.8113	rna5656-EQK98628.1	3400	fgr:FG05904.1	65.38	hypothetical protein; K15083 DNA repair protein RAD16	YBR114w	51.27	[L] KOG1002 Nucleotide excision repair protein RAD16	gi|531859509|gb|EQK98628.1|	98.23	DNA repair protein RAD16 [Ophiocordyceps sinensis CO18]	sp|P31244|RAD16_YEAST	51.27	DNA repair protein RAD16 OS=Saccharomyces cerevisiae (strain ATCC 204508 / S288c) GN=RAD16 PE=1 SV=1	GO:0003677,GO:0005524,GO:0006200,GO:0008026,GO:0008270	321	311	1546	3502	533	568	11.889	12.529	49.3	144.908	13.769	14.787	-2.76413	7.37773	1.10803e-05	0.000160982
MSTRG.3401	MSTRG.3401.1	4688	fgr:FG05149.1	77.3	hypothetical protein; K01530 phospholipid-translocating ATPase [EC:3.6.3.1]	YIL048w	51.85	[P] KOG0210 P-type ATPase	gi|531864648|gb|EQL01675.1|	96.76	P-type ATPase-like protein [Ophiocordyceps sinensis CO18]	sp|P40527|ATC7_YEAST	51.85	Probable phospholipid-transporting ATPase NEO1 OS=Saccharomyces cerevisiae (strain ATCC 204508 / S288c) GN=NEO1 PE=1 SV=1	GO:0000139,GO:0000287,GO:0004012,GO:0005524,GO:0005768,GO:0006890,GO:0006897,GO:0007033,GO:0008152,GO:0015917,GO:0016021,GO:0019829,GO:0030137,GO:0045332,GO:0098655	1407	1769	4298	6997	1305	1151	36.92	50.443	97.135	205.17	23.887	21.219	-2.73917	8.51255	3.55223e-06	6.33307e-05
MSTRG.8156	MSTRG.8156.1	3753	pan:PODANSg6269	65.86	hypothetical protein; K09489 heat shock 70kDa protein 4	YPL106c	43.28	[O] KOG0103 Molecular chaperones HSP105/HSP110/SSE1, HSP70 superfamily	gi|302882363|ref|XP_003040092.1|	73.28	predicted protein [Nectria haematococca mpVI 77-13-4]	sp|O74225|HSP88_NEUCR	71.07	Heat shock protein hsp88 OS=Neurospora crassa (strain ATCC 24698 / 74-OR23-1A / CBS 708.71 / DSM 1257 / FGSC 987) GN=hsp88 PE=1 SV=1	GO:0005524	19342	16207	19527.7	9370.2	3126.77	2683.66	717.707	673.188	642.193	399.869	83.371	71.792	-2.72625	9.74344	1.32775e-06	2.76472e-05
MSTRG.4230	MSTRG.4230.1	5017	fgr:FG09509.1	79.11	hypothetical protein; K10742 DNA replication ATP-dependent helicase Dna2 [EC:3.6.4.12]	YHR164c	38.55	[L] KOG1805 DNA replication helicase	gi|531863911|gb|EQL01088.1|	99.89	DNA replication factor Dna2 [Ophiocordyceps sinensis CO18]	sp|P38859|DNA2_YEAST	38.55	DNA replication ATP-dependent helicase/nuclease DNA2 OS=Saccharomyces cerevisiae (strain ATCC 204508 / S288c) GN=DNA2 PE=1 SV=1	GO:0000737,GO:0004386,GO:0006200,GO:0017108,GO:0033567,GO:0043142	194	118	641	1074	196	194	4.923	3.248	13.87	30.194	3.436	3.387	-2.67579	5.80606	5.7445e-06	9.27192e-05
MSTRG.3479	rna2664-EQL01625.1	3457	pan:PODANSg415	84	hypothetical protein; K03235 elongation factor 3	YNL014w_2	72.87	[EJ] KOG0062 ATPase component of ABC transporters with duplicated ATPase domains/Translation elongation factor EF-3b	gi|531864588|gb|EQL01625.1|	97.85	elongation factor 3 [Ophiocordyceps sinensis CO18]	sp|O93796|EF3_CANGA	64.46	Elongation factor 3 OS=Candida glabrata (strain ATCC 2001 / CBS 138 / JCM 3761 / NBRC 0622 / NRRL Y-65) GN=TEF3 PE=3 SV=2	GO:0003746,GO:0005524,GO:0006200,GO:0006415,GO:0006448,GO:0016887,GO:0022626	8519	14200	9964	7730	2276	1660	327.748	593.849	329.943	332.144	61.069	44.869	-2.63019	9.09816	1.76409e-06	3.48447e-05
MSTRG.3972	MSTRG.3972.1	3660	mgr:MGG_09300	82.75	MG09300.4; hypothetical protein; K02210 minichromosome maintenance protein 7 (cell division control protein 47)	SPBC25D12.03c	64.09	[L] KOG0482 DNA replication licensing factor, MCM7 component	gi|531864156|gb|EQL01265.1|	88.67	DNA replication licensing factor mcm7 [Ophiocordyceps sinensis CO18]	sp|O75001|MCM7_SCHPO	64.09	DNA replication licensing factor mcm7 OS=Schizosaccharomyces pombe (strain 972 / ATCC 24843) GN=mcm7 PE=1 SV=1	GO:0000727,GO:0000785,GO:0003682,GO:0003688,GO:0003697,GO:0003712,GO:0005524,GO:0005656,GO:0005667,GO:0006200,GO:0006267,GO:0006268,GO:0006270,GO:0006271,GO:0006348,GO:0006357,GO:0009378,GO:0009379,GO:0030466,GO:0031261,GO:0031298,GO:0042555,GO:0043140,GO:0043142,GO:0045449,GO:0046809,GO:0051301	521	621	1287	985	242	266	20.684	25.309	45.042	44.073	6.631	7.486	-2.62002	6.1389	6.07617e-07	1.47327e-05
MSTRG.844	MSTRG.844.1	2553	ssl:SS1G_08798	64.78	hypothetical protein	At5g63630	38.61	[A] KOG0342 ATP-dependent RNA helicase pitchoune	gi|531866797|gb|EQL03583.1|	97.33	ATP-dependent RNA helicase [Ophiocordyceps sinensis CO18]	sp|Q0UG00|MS116_PHANO	43.99	ATP-dependent RNA helicase MSS116, mitochondrial OS=Phaeosphaeria nodorum (strain SN15 / ATCC MYA-4574 / FGSC 10173) GN=MSS116 PE=3 SV=1	GO:0003676,GO:0005524,GO:0006200,GO:0008026	1546.21	2716.2	2021.87	4956.77	870.41	821.82	83.504	151.704	88.293	285.165	34.153	28.003	-2.61852	7.87099	3.74119e-05	0.000437088
MSTRG.4819	MSTRG.4819.1	5628	fgr:FG05751.1	82.11	hypothetical protein; K11681 helicase SWR1 [EC:3.6.4.12]	YDR334w	53.89	[R] KOG0391 SNF2 family DNA-dependent ATPase	gi|531863389|gb|EQL00692.1|	100	helicase SWR1 [Ophiocordyceps sinensis CO18]	sp|Q4IAK7|SWR1_GIBZE	82.11	Helicase SWR1 OS=Gibberella zeae (strain PH-1 / ATCC MYA-4620 / FGSC 9075 / NRRL 31084) GN=SWR1 PE=3 SV=1	GO:0003677,GO:0005524,GO:0005634,GO:0006200,GO:0006355,GO:0008026,GO:0016568	753	886	1908	2835	579	549	16.19	20.694	35.95	69.512	8.781	8.293	-2.60058	7.27112	5.27803e-06	8.6731e-05
MSTRG.2959	MSTRG.2959.1	4153	fgr:FG01265.1	84.64	hypothetical protein; K05853 Ca2+ transporting ATPase, sarcoplasmic/endoplasmic reticulum [EC:3.6.3.8]	CE18885	54.2	[P] KOG0202 Ca2+ transporting ATPase	gi|531865057|gb|EQL02013.1|	99.66	ATPase, P-type, calcium-transporting [Ophiocordyceps sinensis CO18]	sp|Q7PPA5|ATC1_ANOGA	55.01	Calcium-transporting ATPase sarcoplasmic/endoplasmic reticulum type OS=Anopheles gambiae GN=Ca-P60A PE=3 SV=5	GO:0005388,GO:0005524,GO:0008152,GO:0016021,GO:0016529,GO:0046872,GO:0070588	4997.59	3878.89	5478.52	3439.24	1095.8	956.07	188.391	157.474	170.018	139.923	28.385	25.133	-2.55881	8.09792	1.49965e-06	3.04853e-05
MSTRG.795	MSTRG.795.1	6103	fgr:FG10944.1	75.56	hypothetical protein; K06675 structural maintenance of chromosome 4	SPBC146.03c	40.58	[BD] KOG0996 Structural maintenance of chromosome protein 4 (chromosome condensation complex Condensin, subunit C)	gi|531866872|gb|EQL03655.1|	98.34	condensin subunit Cut3 [Ophiocordyceps sinensis CO18]	sp|P41004|SMC4_SCHPO	40.58	Structural maintenance of chromosomes protein 4 OS=Schizosaccharomyces pombe (strain 972 / ATCC 24843) GN=cut3 PE=1 SV=2	GO:0003677,GO:0005524,GO:0005634,GO:0005694,GO:0051276	680	375	2819	888	402	414	16.348	9.682	55.646	23.745	6.673	6.669	-2.55713	6.76763	6.59213e-06	0.000103353
MSTRG.1866	MSTRG.1866.1	4296	fgr:FG07112.1	70.7	hypothetical protein; K08736 DNA mismatch repair protein MSH3	Hs4505249	39.24	[L] KOG0218 Mismatch repair MSH3	gi|531865953|gb|EQL02801.1|	98.19	DNA mismatch repair protein msh3 [Ophiocordyceps sinensis CO18]	sp|Q2HFD4|MSH3_CHAGB	59.95	DNA mismatch repair protein MSH3 OS=Chaetomium globosum (strain ATCC 6205 / CBS 148.51 / DSM 1962 / NBRC 6347 / NRRL 1970) GN=MSH3 PE=3 SV=1	GO:0005524,GO:0006298,GO:0030983	820.37	1925.92	896.83	2199.05	310.36	473.21	38.816	102.604	31.729	105.172	9.628	15.427	-2.55625	6.7078	5.28036e-05	0.000568747
MSTRG.5090	MSTRG.5090.1	4767	fgr:FG10269.1	88.82	hypothetical protein	YOR304w	56.14	[K] KOG0385 Chromatin remodeling complex WSTF-ISWI, small subunit	gi|531863130|gb|EQL00508.1|	95.78	chromatin remodelling complex ATPase chain ISW1 [Ophiocordyceps sinensis CO18]	sp|Q5A310|ISW2_CANAL	55.51	ISWI chromatin-remodeling complex ATPase ISW2 OS=Candida albicans (strain SC5314 / ATCC MYA-2876) GN=ISW2 PE=2 SV=1	GO:0000785,GO:0003677,GO:0005524,GO:0005634,GO:0008152,GO:0016818,GO:0031491,GO:0043044	1118.64	950.68	4128.96	5445.13	1216.44	1123.48	29.863	27.529	95.548	163.846	22.476	20.982	-2.55013	8.27935	5.15517e-06	8.49668e-05
MSTRG.3344	rna2565-EQL01713.1	1721	nfi:NFIA_086990	57.58	mitochondrial DnaJ chaperone (Mdj1), putative; K03686 molecular chaperone DnaJ	SPCC4G3.14	42.86	[O] KOG0715 Molecular chaperone (DnaJ superfamily)	gi|531864693|gb|EQL01713.1|	95.71	Heat shock protein DnaJ [Ophiocordyceps sinensis CO18]	sp|C8V213|MDJ1_EMENI	56.29	DnaJ homolog 1, mitochondrial OS=Emericella nidulans (strain FGSC A4 / ATCC 38163 / CBS 112.46 / NRRL 194 / M139) GN=AN10778 PE=3 SV=1	GO:0005524,GO:0006457,GO:0009408,GO:0016491,GO:0031072,GO:0046872,GO:0051082,GO:0055114	13505	11250	11864	5291	2130	1760	1101.02	998.206	830.321	480.689	121.06	100.831	-2.54591	9.00919	6.29139e-06	9.90554e-05
MSTRG.6362	MSTRG.6362.1	4135	fgr:FG06874.1	70.85	hypothetical protein; K03163 DNA topoisomerase I [EC:5.99.1.2]	SPBC1703.14c	51.06	[L] KOG0981 DNA topoisomerase I	gi|531861699|gb|EQK99668.1|	97.21	topoisomerase I [Ophiocordyceps sinensis CO18]	sp|Q00313|TOP1_CANAX	56.02	DNA topoisomerase 1 OS=Candida albicans GN=TOP1 PE=3 SV=1	GO:0003677,GO:0003917,GO:0003918,GO:0005694,GO:0006200,GO:0006265	2175.8	2390.93	5200.87	9118.25	1800.84	1815.11	79.552	93.624	168.886	387.766	49.209	45.176	-2.53022	8.89077	2.23411e-05	0.000288478
MSTRG.2249	rna1763-EQL02526.1	13242	fgr:FG09607.1	86.12	DYHC_FUSSO Dynein heavy chain, cytosolic (DYHC); K10413 dynein heavy chain 1, cytosolic	7292540	49.03	[Z] KOG3595 Dyneins, heavy chain	gi|531865643|gb|EQL02526.1|	99.22	Dynein heavy chain, cytoplasmic [Ophiocordyceps sinensis CO18]	sp|P78716|DYHC_FUSSO	86.77	Dynein heavy chain, cytoplasmic OS=Fusarium solani subsp. pisi GN=DHC1 PE=3 SV=1	GO:0003777,GO:0005524,GO:0005874,GO:0006200,GO:0007018,GO:0016887,GO:0030286	1353	886	4539	3954	1252	839	12.002	8.528	34.716	39.224	7.744	5.23	-2.49617	8.07124	4.04216e-06	6.95287e-05
MSTRG.4240	MSTRG.4240.1	2824	fgr:FG09513.1	79.65	hypothetical protein	SPBP23A10.10	29.96	[T] KOG2137 Protein kinase	gi|531863916|gb|EQL01093.1|	99.64	protein kinase domain-containing protein ppk32 [Ophiocordyceps sinensis CO18]	sp|Q9P7X5|PPK32_SCHPO	29.96	Protein kinase domain-containing protein ppk32 OS=Schizosaccharomyces pombe (strain 972 / ATCC 24843) GN=ppk32 PE=1 SV=1	GO:0004180,GO:0004672,GO:0005524,GO:0006468	370	423	1198	2040	525	324	18.178	22.688	52.25	114.15	17.994	11.68	-2.47354	6.75262	1.9889e-05	0.000261142
MSTRG.1434	MSTRG.1434.1	2331	fgr:FG06777.1	87.55	hypothetical protein; K02209 minichromosome maintenance protein 5 (cell division control protein 46)	SPAC3F10.01	64.78	[L] KOG0481 DNA replication licensing factor, MCM5 component	gi|531866310|gb|EQL03127.1|	99.37	DNA replication licensing factor mcm5 [Ophiocordyceps sinensis CO18]	sp|P41389|MCM5_SCHPO	64.78	DNA replication licensing factor mcm5 OS=Schizosaccharomyces pombe (strain 972 / ATCC 24843) GN=mcm5 PE=1 SV=2	GO:0000727,GO:0000784,GO:0000785,GO:0003678,GO:0003682,GO:0003688,GO:0003697,GO:0005524,GO:0005656,GO:0005737,GO:0006267,GO:0006343,GO:0030174,GO:0031261,GO:0031298,GO:0031939,GO:0032508,GO:0042555,GO:0046809	365	450	1505	2685	565	539	21.226	28.47	75.166	174.214	22.874	21.965	-2.47028	7.12909	2.1719e-05	0.000282114
MSTRG.1168	rna969-EQL03318.1	2330	bfu:BC1G_03375	68.57	hypothetical protein ; K14824 ribosome biogenesis protein ERB1	YMR049c	47.73	[J] KOG0650 WD40 repeat nucleolar protein Bop1, involved in ribosome biogenesis	gi|531866517|gb|EQL03318.1|	100	eukaryotic ribosome biogenesis protein 1 [Ophiocordyceps sinensis CO18]	sp|A6RRD4|ERB1_BOTFB	68.57	Ribosome biogenesis protein erb1 OS=Botryotinia fuckeliana (strain B05.10) GN=erb1 PE=3 SV=1	GO:0000463,GO:0000466,GO:0005654,GO:0030687,GO:0043021,GO:0070545	987	1585	1926	1627	436	469	54.408	95.016	91.29	100.082	16.757	18.165	-2.44278	6.81972	1.52501e-06	3.09281e-05
MSTRG.2768	rna2134-EQL02139.1	1995	fgr:FG06243.1	72.56	hypothetical protein; K14835 ribosomal RNA methyltransferase Nop2 [EC:2.1.1.-]	YNL061w	61.01	[A] KOG1122 tRNA and rRNA cytosine-C5-methylase (nucleolar protein NOL1/NOP2)	gi|531865210|gb|EQL02139.1|	100	tRNA (cytosine-5-)-methyltransferase NCL1 [Ophiocordyceps sinensis CO18]	sp|P40991|NOP2_YEAST	61.01	25S rRNA (cytosine(2870)-C(5))-methyltransferase OS=Saccharomyces cerevisiae (strain ATCC 204508 / S288c) GN=NOP2 PE=1 SV=1	GO:0003723,GO:0006364,GO:0008757,GO:0030687,GO:0032259	792	1226	1421	1768	405	435	50.389	84.857	77.698	125.468	17.969	19.447	-2.43488	6.70565	3.89065e-06	6.74896e-05
MSTRG.5068	MSTRG.5068.1	3118	pan:PODANSg5658	62.26	hypothetical protein; K14439 SWI/SNF-related matrix-associated actin-dependent regulator of chromatin subfamily A containing DEAD/H box 1 [EC:3.6.4.12]	SPCC1235.05c	39.56	[B] KOG0389 SNF2 family DNA-dependent ATPase	gi|302922109|ref|XP_003053398.1|	79.49	hypothetical protein NECHADRAFT_65429 [Nectria haematococca mpVI 77-13-4]	sp|O74842|FFT2_SCHPO	39.56	ATP-dependent helicase fft2 OS=Schizosaccharomyces pombe (strain 972 / ATCC 24843) GN=fft2 PE=1 SV=1	GO:0003677,GO:0004386,GO:0005524,GO:0008152	372	364	873	1157	255	284	15.332	16.304	30.829	52.779	7.246	8.24	-2.42936	6.06203	1.01984e-05	0.000150574
MSTRG.1531	MSTRG.1531.1	4094	fgr:FG05088.1	86.2	similar to kinesin	SPAC1834.07	65.57	[Z] KOG0240 Kinesin (SMY1 subfamily)	gi|531866221|gb|EQL03048.1|	99.88	kinesin [Ophiocordyceps sinensis CO18]	sp|Q86Z98|KINH_GIBMO	87.28	Kinesin heavy chain OS=Gibberella moniliformis GN=KLP1 PE=3 SV=1	GO:0003777,GO:0005524,GO:0005737,GO:0005871,GO:0005874,GO:0007018,GO:0008017,GO:0008152,GO:0045298	1012	1358	4532	7087	1545	1585	35.553	52.462	137.538	278.403	37.473	38.252	-2.426	8.59431	2.74156e-05	0.000342256
MSTRG.2446	MSTRG.2446.2	6927	fgr:FG10189.1	80.77	hypothetical protein	7302884	53.81	[Z] KOG0245 Kinesin-like protein	gi|531865483|gb|EQL02380.1|	100	kinesin [Ophiocordyceps sinensis CO18]	sp|Q7PHR1|KIF1A_ANOGA	53.94	Kinesin-like protein unc-104 OS=Anopheles gambiae GN=unc-104 PE=3 SV=3	GO:0003777,GO:0005524,GO:0005871,GO:0005874,GO:0007018,GO:0008017,GO:0008152,GO:0045298	694.92	602.2	2659.5	3301.51	897.01	698.5	14.745	14.611	49.69	81.05	13.28	10.022	-2.41315	7.61092	1.14909e-05	0.000166062
MSTRG.10317	MSTRG.10317.1	769	fgr:FG01964.1	86.59	similar to AF484941_1 class V chitin synthase; K00698 chitin synthase [EC:2.4.1.16]	-	-	-	gi|94469539|gb|ABF20219.1|	93.9	class V chitin synthase [Neotyphodium lolii]	-	-	-	GO:0003774,GO:0005524,GO:0008152,GO:0016459	96	34	472	514	165	98	19.397	7.5	81.252	114.996	23.206	13.918	-2.40277	5.00665	5.69386e-05	0.000603748
MSTRG.1084	rna889-EQL03388.1	1468	fgr:FG04028.1	81.82	hypothetical protein; K14777 ATP-dependent RNA helicase DDX47/RRP3 [EC:3.6.4.13]	SPAC823.08c	65.95	[A] KOG0330 ATP-dependent RNA helicase	gi|531866591|gb|EQL03388.1|	100	ATP-dependent rRNA helicase RRP3 [Ophiocordyceps sinensis CO18]	sp|Q4IFI0|RRP3_GIBZE	81.82	ATP-dependent rRNA helicase RRP3 OS=Gibberella zeae (strain PH-1 / ATCC MYA-4620 / FGSC 9075 / NRRL 31084) GN=RRP3 PE=3 SV=1	GO:0003676,GO:0005524,GO:0006200,GO:0008026	301	338	613	673	130	213	31.252	38.215	54.561	77.779	9.404	15.541	-2.4024	5.38972	3.57966e-05	0.000423619
MSTRG.10887	MSTRG.10887.1	2103	fgr:FG01964.1	79.65	similar to AF484941_1 class V chitin synthase; K00698 chitin synthase [EC:2.4.1.16]	Hs11037057	23.78	[N] KOG4229 Myosin VII, myosin IXB and related myosins	gi|672382450|gb|KFG84576.1|	84.96	class V chitin synthase [Metarhizium anisopliae]	sp|Q4P9K9|CHS8_USTMA	31.25	Chitin synthase 8 OS=Ustilago maydis (strain 521 / FGSC 9021) GN=CHS8 PE=3 SV=1	GO:0003677,GO:0003774,GO:0004100,GO:0005524,GO:0006031,GO:0016459,GO:0020037	1062	631	4117	4591	1402	966	63.723	41.187	212.342	307.322	58.662	40.727	-2.3788	8.15163	1.54953e-05	0.000212933
MSTRG.4990	MSTRG.4990.1	1684	aor:AOR_1_6174	63.25	AO090005000005; serine-threonine protein kinase	SPBC530.14c	26.79	[T] KOG1290 Serine/threonine protein kinase	gi|531863218|gb|EQL00566.1|	99.18	serine/threonine protein kinase [Ophiocordyceps sinensis CO18]	sp|P36616|DSK1_SCHPO	26.79	Protein kinase dsk1 OS=Schizosaccharomyces pombe (strain 972 / ATCC 24843) GN=dsk1 PE=3 SV=2	GO:0004674,GO:0005524,GO:0006468,GO:0009069	365	115	1313	953	326	278	31.026	10.623	95.956	90.185	19.496	16.533	-2.36149	6.16864	5.43796e-06	8.88228e-05
MSTRG.9612	rna6435-EQK97851.1	2731	mgr:MGG_05193	97.21	MG05193.4; cell division control protein Cdc48; K13525 transitional endoplasmic reticulum ATPase	YDL126c	86.23	[O] KOG0730 AAA+-type ATPase	gi|531856712|gb|EQK97851.1|	99.4	cell division cycle protein [Ophiocordyceps sinensis CO18]	sp|Q5AWS6|CDC48_EMENI	93.01	Cell division control protein 48 OS=Emericella nidulans (strain FGSC A4 / ATCC 38163 / CBS 112.46 / NRRL 194 / M139) GN=cdc48 PE=1 SV=2	GO:0005524,GO:0008152,GO:0016787,GO:0043581,GO:0051301	15200	10406	16748	7826	3237	3137	766.617	570.685	726.497	440.556	113.847	111.168	-2.35621	9.56141	2.19452e-05	0.000284714
MSTRG.8380	MSTRG.8380.1	3470	fgr:FG08595.1	79.29	hypothetical protein; K01530 phospholipid-translocating ATPase [EC:3.6.3.1]	SPAC24B11.12c	50.06	[R] KOG0206 P-type ATPase	gi|629683801|ref|XP_007807196.1|	81.01	phospholipid-translocating P-type ATPase domain-containing protein [Metarhizium acridum CQMa 102]	sp|Q09891|ATCX_SCHPO	50.06	Putative phospholipid-transporting ATPase C24B11.12c OS=Schizosaccharomyces pombe (strain 972 / ATCC 24843) GN=SPAC24B11.12c PE=3 SV=1	GO:0000287,GO:0004012,GO:0005524,GO:0005739,GO:0005886,GO:0006886,GO:0006897,GO:0007163,GO:0008152,GO:0015917,GO:0016021,GO:0019829,GO:0045332,GO:0098655	624	532	3352	3566	1186	732	22.197	20.568	102.655	141.71	29.431	18.297	-2.34608	7.82018	1.94361e-05	0.000257052
MSTRG.1047	rna856-EQL03437.1	2624	fgr:FG05108.1	62.31	hypothetical protein	At5g63630	35.57	[A] KOG0342 ATP-dependent RNA helicase pitchoune	gi|531866642|gb|EQL03437.1|	100	ATP-dependent RNA helicase [Ophiocordyceps sinensis CO18]	sp|Q4WRP2|MS116_ASPFU	44.92	ATP-dependent RNA helicase mss116, mitochondrial OS=Neosartorya fumigata (strain ATCC MYA-4609 / Af293 / CBS 101355 / FGSC A1100) GN=mss116 PE=3 SV=1	GO:0003676,GO:0005524,GO:0006200,GO:0008026	4580.63	5111.92	9970.35	7191.44	2560.55	2116.59	340.687	436.426	536.403	508.187	108.137	113.915	-2.329	9.09218	1.52323e-05	0.000210864
MSTRG.6829	rna4916-EQK99366.1	987	fgr:FG09562.1	65.06	hypothetical protein	Hs21489973	25.57	[B] KOG4718 Non-SMC (structural maintenance of chromosomes) element 1 protein (NSE1)	gi|531861215|gb|EQK99366.1|	100	Nse1 non-SMC component of SMC5-6 complex [Ophiocordyceps sinensis CO18]	sp|Q8WV22|NSE1_HUMAN	25.57	Non-structural maintenance of chromosomes element 1 homolog OS=Homo sapiens GN=NSMCE1 PE=1 SV=5	GO:0006281,GO:0030915	371	434	590	662	217	140	54.047	68.929	73.487	107.105	22.019	14.339	-2.3099	5.36853	6.16169e-05	0.000646135
MSTRG.3446	MSTRG.3446.1	5316	fgr:FG05174.1	88.6	hypothetical protein; K10807 ribonucleoside-diphosphate reductase subunit M1 [EC:1.17.4.1]	SPAC1F7.05	74.02	[F] KOG1112 Ribonucleotide reductase, alpha subunit	gi|531864625|gb|EQL01655.1|	96.96	ribonucleoside-diphosphate reductase large chain [Ophiocordyceps sinensis CO18]	sp|Q9UW15|RIR1_NEUCR	84.4	Ribonucleoside-diphosphate reductase large chain OS=Neurospora crassa (strain ATCC 24698 / 74-OR23-1A / CBS 708.71 / DSM 1257 / FGSC 987) GN=rnr-1 PE=1 SV=2	GO:0004748,GO:0005524,GO:0005971,GO:0006144,GO:0006206,GO:0006260,GO:0009186,GO:0055114	1550.77	834.71	2382.53	1518.29	496.39	577.76	47.115	27.654	64.849	55.319	11.097	11.873	-2.30089	6.9478	6.19836e-06	9.79346e-05
MSTRG.1272	MSTRG.1272.1	5758	fgr:FG06754.1	76.08	hypothetical protein; K06669 structural maintenance of chromosome 3 (chondroitin sulfate proteoglycan 6)	SPAC10F6.09c	41.4	[D] KOG0964 Structural maintenance of chromosome protein 3 (sister chromatid cohesion complex Cohesin, subunit SMC3)	gi|531866417|gb|EQL03224.1|	98.05	RecF/RecN/SMC [Ophiocordyceps sinensis CO18]	sp|Q00737|SUDA_EMENI	52.42	Chromosome segregation protein sudA OS=Emericella nidulans (strain FGSC A4 / ATCC 38163 / CBS 112.46 / NRRL 194 / M139) GN=sudA PE=2 SV=3	GO:0000785,GO:0003682,GO:0005524,GO:0006281,GO:0007064,GO:0008280	204.07	206.31	1289.15	2348.2	565.42	554.98	6.639	7.437	34.976	84.165	12.118	11.9	-2.24717	6.96338	8.2938e-05	0.000819689
MSTRG.2533	rna1979-EQL02307.1	1708	mgr:MGG_01100	74.77	MG01100.4; hypothetical protein; K14768 U3 small nucleolar RNA-associated protein 7	SPAC959.03c	50	[A] KOG1272 WD40-repeat-containing subunit of the 18S rRNA processing complex	gi|531865402|gb|EQL02307.1|	100	small nucleolar ribonucleoprotein complex subunit [Ophiocordyceps sinensis CO18]	sp|Q9P4X3|UTP7_SCHPO	50	Probable U3 small nucleolar RNA-associated protein 7 OS=Schizosaccharomyces pombe (strain 972 / ATCC 24843) GN=utp7 PE=3 SV=1	GO:0000447,GO:0000472,GO:0000480,GO:0019013,GO:0030686,GO:0032040	477	752	905	949	285	273	37.36	64.101	60.869	82.848	15.562	15.024	-2.22469	5.94142	2.36048e-05	0.00030229
MSTRG.2059	MSTRG.2059.1	7530	fgr:FG08133.1	87.56	hypothetical protein; K07203 FKBP12-rapamycin complex-associated protein	SPBC30D10.10c	44.23	[L] KOG0891 DNA-dependent protein kinase	gi|672384267|gb|KFG86366.1|	90.07	TOR kinase [Metarhizium anisopliae]	sp|Q9Y7K2|TOR2_SCHPO	48.8	Phosphatidylinositol 3-kinase tor2 OS=Schizosaccharomyces pombe (strain 972 / ATCC 24843) GN=tor2 PE=1 SV=2	GO:0005524,GO:0008144,GO:0016301,GO:0016310,GO:0016773	2325	2264	5309	5080	1684	1687	37.247	39.406	73.32	91.01	18.824	18.99	-2.10722	8.4375	7.04173e-05	0.000720753
MSTRG.9104	MSTRG.9104.4	4142	pan:PODANSg6163	66.49	hypothetical protein; K06628 cell division control protein 45	SPAC17D4.02	39.95	[L] KOG2475 CDC45 (cell division cycle 45)-like protein	gi|531857793|gb|EQK98113.1|	94.02	CDC45 family [Ophiocordyceps sinensis CO18]	sp|O74113|CDC45_SCHPO	39.95	Cell division control protein 45 homolog OS=Schizosaccharomyces pombe (strain 972 / ATCC 24843) GN=sna41 PE=1 SV=1	GO:0005509,GO:0006270,GO:0051301	261.22	120.77	924.75	928.57	347.53	262.49	17.534	8.817	45.163	59.75	14.74	10.574	-2.09212	5.96119	7.21782e-05	0.000732592
MSTRG.5875	MSTRG.5875.1	2715	fgr:FG08875.1	80.38	hypothetical protein; K00958 sulfate adenylyltransferase [EC:2.7.7.4]	YJR010w	53.25	[P] KOG0636 ATP sulfurylase (sulfate adenylyltransferase)	gi|531862171|gb|EQK99959.1|	92.83	Sulfate adenylyltransferase [Ophiocordyceps sinensis CO18]	sp|Q4I1N3|MET3_GIBZE	80.38	Sulfate adenylyltransferase OS=Gibberella zeae (strain PH-1 / ATCC MYA-4620 / FGSC 9075 / NRRL 31084) GN=MET3 PE=3 SV=2	GO:0000103,GO:0004020,GO:0004781,GO:0005524,GO:0005737,GO:0006144,GO:0009086,GO:0016310,GO:0019344,GO:0070814	3152	1643	564	376	3180	2858	208.59	118.92	32.072	26.745	150.399	140.329	2.23738	7.14907	1.53437e-05	0.000211729
MSTRG.7917	MSTRG.7917.1	3057	fgr:FG09851.1	83.82	hypothetical protein	SPAC328.04	66.26	[O] KOG0740 AAA+-type ATPase	gi|531859836|gb|EQK98730.1|	94.71	AAA family ATPase [Ophiocordyceps sinensis CO18]	sp|Q9P3U2|YKX4_SCHPO	66.26	Uncharacterized AAA domain-containing protein C328.04 OS=Schizosaccharomyces pombe (strain 972 / ATCC 24843) GN=SPAC328.04 PE=3 SV=1	GO:0005524	374	203	101	126	883	713	17.082	9.444	3.72	6.459	28.858	22.667	2.30409	5.22483	6.8723e-05	0.00070873
MSTRG.5904	MSTRG.5904.1	1413	fgr:FG09853.1	90.13	hypothetical protein; K14568 essential for mitotic growth 1	YLR186w	72.37	[J] KOG3073 Protein required for 18S rRNA maturation and 40S ribosome biogenesis	gi|531862148|gb|EQK99949.1|	100	Ribosomal biogenesis, methyltransferase, EMG1/NEP1 [Ophiocordyceps sinensis CO18]	sp|Q9P8P7|NEP1_CANAX	75.5	Ribosomal RNA small subunit methyltransferase NEP1 OS=Candida albicans GN=NEP1 PE=3 SV=1	GO:0000447,GO:0000472,GO:0000480,GO:0003723,GO:0005730,GO:0005737,GO:0005880,GO:0008168,GO:0030686,GO:0032040,GO:0032259,GO:0042803	748	1104	380	101	1507	1658	99.875	167.62	43.437	13.158	148.789	158.249	2.3548	6.19961	8.37872e-05	0.000825092
MSTRG.7994	MSTRG.7994.1	3513	ure:UREG_05084	35.38	hypothetical protein	At1g49180_1	36.81	[OUT] KOG0595 Serine/threonine-protein kinase involved in autophagy	gi|531859737|gb|EQK98694.1|	100	CAMK family protein kinase [Ophiocordyceps sinensis CO18]	sp|P25323|MYLKA_DICDI	35.66	Myosin light chain kinase A OS=Dictyostelium discoideum GN=mlkA PE=1 SV=2	GO:0004674,GO:0005524,GO:0006468,GO:0009069	295	150	125	42	760	567	15.942	8.503	5.863	3.407	27.323	19.648	2.60312	4.91356	3.28264e-05	0.000394894
MSTRG.4196	rna3171-EQL01122.1	1731	fgr:FG05249.1	80.15	hypothetical protein; K01881 prolyl-tRNA synthetase [EC:6.1.1.15]	YHR020w	55.08	[J] KOG4163 Prolyl-tRNA synthetase	gi|531863955|gb|EQL01122.1|	96.32	prolyl-tRNA synthetase [Ophiocordyceps sinensis CO18]	sp|P38708|YHI0_YEAST	55.08	Putative proline--tRNA ligase YHR020W OS=Saccharomyces cerevisiae (strain ATCC 204508 / S288c) GN=YHR020W PE=1 SV=1	GO:0004827,GO:0005524,GO:0005840,GO:0006433,GO:0006525,GO:0006560,GO:0051276	526	342	134	37	840	626	40.86	28.909	8.934	3.209	45.491	34.172	2.72798	5.03936	2.48777e-05	0.000314897
MSTRG.2756	rna2122-EQL02155.1	2418	cim:CIMG_03124	50.92	hypothetical protein	-	-	-	gi|531865229|gb|EQL02155.1|	96.52	serine/threonine-protein kinase Sgk2 [Ophiocordyceps sinensis CO18]	-	-	-	GO:0004672,GO:0005524,GO:0006468	90	65	70	40	501	545	4.765	3.737	3.182	2.362	18.483	20.254	2.81449	4.54662	3.62401e-06	6.43999e-05
MSTRG.287	rna232-EQL04078.1	1677	ncr:NCU03415	85.38	aldehyde dehydrogenase; K00128 aldehyde dehydrogenase (NAD+) [EC:1.2.1.3]	SPAC9E9.09c	65.89	[C] KOG2450 Aldehyde dehydrogenase	gi|531867314|gb|EQL04078.1|	98.68	aldehyde dehydrogenase [Ophiocordyceps sinensis CO18]	sp|P40108|ALDH_DAVTA	78.19	Aldehyde dehydrogenase OS=Davidiella tassiana GN=CLAH10 PE=1 SV=2	GO:0016620,GO:0030472,GO:0042729,GO:0055114,GO:0072686	2919	2319	833	271	6789	4372	257.917	223.054	63.161	26.672	418.148	271.479	2.95921	7.93085	9.77884e-07	2.18194e-05
MSTRG.4753	MSTRG.4753.1	1306	scm:SCHCODRAFT_56595	45.95	hypothetical protein; K01866 tyrosyl-tRNA synthetase [EC:6.1.1.1]	YGR185c	39.55	[J] KOG2144 Tyrosyl-tRNA synthetase, cytoplasmic	gi|531863444|gb|EQL00732.1|	100	tyrosyl-tRNA synthetase [Ophiocordyceps sinensis CO18]	sp|Q5ZJ08|SYYC_CHICK	41.61	Tyrosine--tRNA ligase, cytoplasmic OS=Gallus gallus GN=YARS PE=2 SV=1	GO:0000162,GO:0004831,GO:0005524,GO:0005737,GO:0006437,GO:0006571,GO:0009094	588	518	121	64	1308	651	69.797	67.575	12.265	8.183	109.556	54.496	2.97779	5.4246	1.14871e-06	2.47211e-05
MSTRG.3377	MSTRG.3377.2	3437	fgr:FG01751.1	34.34	hypothetical protein	-	-	-	gi|531864673|gb|EQL01696.1|	99.61	serine/threonine-protein kinase Sgk2 [Ophiocordyceps sinensis CO18]	-	-	-	GO:0004672,GO:0005524,GO:0006468	25	14	27	9	222	210.67	3.782	2.232	4.203	1.819	25.721	24.519	3.18389	3.25361	1.8056e-05	0.000241544
MSTRG.193	rna161-EQL04138.1	2003	fgr:FG04314.1	65.45	hypothetical protein; K03544 ATP-dependent Clp protease ATP-binding subunit ClpX	YBR227c	35.89	[O] KOG0745 Putative ATP-dependent Clp-type protease (AAA+ ATPase superfamily)	gi|531867377|gb|EQL04138.1|	95.65	Clp protease, ATP-binding subunit ClpX [Ophiocordyceps sinensis CO18]	sp|P38323|MCX1_YEAST	35.89	Mitochondrial clpX-like chaperone MCX1 OS=Saccharomyces cerevisiae (strain ATCC 204508 / S288c) GN=MCX1 PE=1 SV=1	GO:0005524,GO:0006457,GO:0006508,GO:0008233,GO:0051082	408	128	200	84	1718	1700	32.358	11.049	13.619	7.42	94.99	94.749	3.18571	6.20345	1.54201e-08	6.83939e-07
MSTRG.9316	rna6296-EQK97992.1	825	pno:SNOG_08548	53.14	hypothetical protein	-	-	-	gi|531857374|gb|EQK97992.1|	100	Protein kinase-like domain protein [Ophiocordyceps sinensis CO18]	-	-	-	GO:0005524,GO:0016301,GO:0016310,GO:0016773,GO:0046677	65	54	33	7	273	231	11.945	10.836	5.177	1.421	34.933	29.845	3.28135	3.4582	2.83941e-05	0.000352456
MSTRG.7721	MSTRG.7721.2	945	pan:PODANSg6204	86.96	hypothetical protein; K02151 V-type H+-transporting ATPase subunit F [EC:3.6.3.14]	YGR020c	73.91	[C] KOG3432 Vacuolar H+-ATPase V1 sector, subunit F	gi|672796584|gb|KFH47129.1|	90.2	V-type proton ATPase subunit F-like protein [Acremonium chrysogenum ATCC 11550]	sp|Q9Y756|VATF_NEUCR	57.65	V-type proton ATPase subunit F OS=Neurospora crassa (strain ATCC 24698 / 74-OR23-1A / CBS 708.71 / DSM 1257 / FGSC 987) GN=vma-7 PE=3 SV=1	GO:0006119,GO:0015991,GO:0033180,GO:0046961	710	658	198	136	2078	2538	203.182	206.549	42.518	35.639	407.939	433.545	3.33939	6.62188	3.77039e-10	2.60371e-08
MSTRG.3376	MSTRG.3376.1	1959	fgr:FG01751.1	34.55	hypothetical protein	-	-	-	gi|531864672|gb|EQL01695.1|	99.6	serine/threonine-protein kinase Sgk2 [Ophiocordyceps sinensis CO18]	-	-	-	GO:0004672,GO:0005524,GO:0006468	152	68	189	98	2078	1873.33	11.437	5.819	12.432	8.434	110.892	98.926	3.36012	6.39553	6.98171e-10	4.37285e-08
MSTRG.8460	rna5842-EQK98442.1	829	pcs:Pc17g00280	56.91	Pc17g00280	CE05780	32.56	[T] KOG0032 Ca2+/calmodulin-dependent protein kinase, EF-Hand protein superfamily	gi|531859003|gb|EQK98442.1|	99.01	Protein kinase-like domain protein [Ophiocordyceps sinensis CO18]	sp|P83104|M3K7L_DROME	28.28	Putative mitogen-activated protein kinase kinase kinase 7-like OS=Drosophila melanogaster GN=Takl1 PE=2 SV=1	GO:0004672,GO:0005524,GO:0006468	206	154	46	11	580	271	40.6	33.148	7.728	2.404	79.594	37.559	3.52529	4.18006	3.91442e-06	6.7794e-05
MSTRG.3688	MSTRG.3688.1	2176	pan:PODANSg2201	43.75	hypothetical protein	SPCC18B5.11c	38.68	[D] KOG0615 Serine/threonine protein kinase Chk2 and related proteins	gi|531864391|gb|EQL01463.1|	100	Protein kinase-like domain protein [Ophiocordyceps sinensis CO18]	sp|Q09170|CDS1_SCHPO	38.68	Serine/threonine-protein kinase cds1 OS=Schizosaccharomyces pombe (strain 972 / ATCC 24843) GN=cds1 PE=1 SV=2	GO:0004674,GO:0005524,GO:0006468,GO:0009069	253	78	130	50	1357	1479	15.931	5.042	6.643	3.407	56.397	62.095	3.57968	5.90088	1.00272e-09	5.97895e-08
MSTRG.3396	MSTRG.3396.1	2293	ssl:SS1G_02686	37.67	hypothetical protein	-	-	-	gi|531864645|gb|EQL01672.1|	100	Protein kinase-like domain protein [Ophiocordyceps sinensis CO18]	-	-	-	GO:0004672,GO:0005524,GO:0006468,GO:0046677	259.69	129.73	152.13	28	1384.47	1379.63	26.363	12.278	13.35	3.543	68.589	82.323	3.59623	5.86238	1.85689e-07	5.52059e-06
MSTRG.9822	MSTRG.9822.1	763	ure:UREG_05476	43	hypothetical protein	-	-	-	gi|531856250|gb|EQK97765.1|	100	phosphotransferase family protein [Ophiocordyceps sinensis CO18]	-	-	-	GO:0005524,GO:0008152,GO:0016773,GO:0046677	1.69	0	5.38	5.72	156.46	131.04	0.474	0	1.29	1.787	30.775	26.063	4.19556	2.6103	5.81294e-07	1.42528e-05
MSTRG.2416	MSTRG.2416.1	5137	ncr:NCU08056	62.73	similar to ABC drug exporter AtrF	YDR011w	36.97	[Q] KOG0065 Pleiotropic drug resistance proteins (PDR1-15), ABC superfamily	gi|531865515|gb|EQL02410.1|	96.7	ABC drug exporter AtrF [Ophiocordyceps sinensis CO18]	sp|Q8T675|ABCGJ_DICDI	38.57	ABC transporter G family member 19 OS=Dictyostelium discoideum GN=abcG19 PE=3 SV=1	GO:0005524,GO:0006200,GO:0016021,GO:0042626,GO:0055085	9	19	40	44	276	2068	0.565	1.304	1.67	2.017	8.582	88.58	4.30688	5.5859	9.95157e-07	2.21595e-05
MSTRG.1624	MSTRG.1624.1	1604	fgr:FG10322.1	74.29	hypothetical protein	At1g03030	40.35	[FH] KOG2702 Predicted panthothenate kinase/uridine kinase-related protein	gi|572274642|gb|ETR98145.1|	78.33	P-loop containing nucleoside triphosphate hydrolase protein [Trichoderma reesei RUT C-30]	sp|A7A245|YFH7_YEAS7	34	ATP-dependent kinase YFH7 OS=Saccharomyces cerevisiae (strain YJM789) GN=YFH7 PE=3 SV=1	GO:0005524,GO:0016020,GO:0016301,GO:0016310,GO:0016787,GO:0055085	2.38	2.57	2.41	1.26	55.7	47.24	0.226	0.263	0.195	0.136	3.644	3.115	4.56104	1.2076	1.44122e-05	0.000200623
MSTRG.3811	MSTRG.3811.1	644	fgr:FG10885.1	90.16	SUCB_NEUCR Probable succinyl-CoA ligase [GDP-forming] beta-chain, mitochondrial precursor (Succinyl-CoA synthetase, beta chain) (SCS-beta); K01900 succinyl-CoA synthetase beta subunit [EC:6.2.1.4 6.2.1.5]	SPCC1620.08	68.03	[C] KOG2799 Succinyl-CoA synthetase, beta subunit	gi|632915042|gb|KDB14658.1|	93.44	putative succinyl-CoA ligase [Villosiclava virens]	sp|Q9P567|SUCB_NEUCR	86.89	Probable succinyl-CoA ligase [GDP-forming] subunit beta, mitochondrial OS=Neurospora crassa (strain ATCC 24698 / 74-OR23-1A / CBS 708.71 / DSM 1257 / FGSC 987) GN=B9J10.140 PE=3 SV=1	GO:0004774,GO:0005524,GO:0008152,GO:0042709,GO:0046872	6.02	4.53	0	0	35.63	24.87	1.84	1.518	0	0	7.569	5.344	7.72656	0.497919	5.38896e-06	8.82867e-05
