# Supplementary material for: Comparative transcriptome analysis revealed genes involved in the fruiting body development of Ophiocordyceps sinensis
Source: PeerJ. 2020 Jan 16;8:e8379. doi: 10.7717/peerj.8379 (PMC6970007; doi:10.7717/peerj.8379)
Supplement: Supplemental Information 6 — The expression patterns of DEGs across the three growth stages were clustered using hierarchical clustering. For each cluster, GO term enrichment analysis were conducted with a threshold value of p ≤ 0.01. [file peerj-08-8379-s006.xlsx]

## Sheet: Sheet1
Supplemental information 6. GO enrichment of DEGs in different clusters.
DEGs enriched GO terms in cluster 1,p ≤ 0.01
GO	Class	Annotated	Significant	Expected	Pvalue	AdjustedP(fdr)	Term
GO:0016491	MF	385	48	19.57	2.8e-05	0.009828	oxidoreductase activity
GO:0016620	MF	15	5	0.76	0.00063	0.110565	oxidoreductase activity, acting on the aldehyde or oxo group of donors, NAD or NADP as acceptor
GO:0005506	MF	63	10	3.2	0.00106	0.12402	iron ion binding
GO:0003824	MF	2081	136	105.75	0.0017	0.149175	catalytic activity
GO:0016813	MF	7	3	0.36	0.00387	0.25155	hydrolase activity, acting on carbon-nitrogen (but not peptide) bonds, in linear amidines
GO:0008080	MF	14	4	0.71	0.0043	0.25155	N-acetyltransferase activity
GO:0004672	MF	131	9	6.66	0.00831	0.416687	protein kinase activity
GO:0055114	BP	390	48	18.91	2.5e-11	2.445e-08	oxidation-reduction process
GO:0008152	BP	2491	137	120.75	9.4e-05	0.045966	metabolic process
GO:0051171	BP	229	6	11.1	0.0026	0.75795	regulation of nitrogen compound metabolic process
GO:0005975	BP	166	17	8.05	0.0031	0.75795	carbohydrate metabolic process
GO:0072525	BP	12	3	0.58	0.0067	1	pyridine-containing compound biosynthetic process
GO:0005829	CC	40	5	0.96	0.0021	0.4767	cytosol
DEGs enriched GO terms in cluster4, p ≤ 0.01
GO	Class	Annotated	Significant	Expected	Pvalue	AdjustedP(fdr)	Term
GO:0020037	MF	66	9	1.4	6.7e-06	0.0023517	heme binding
GO:0005506	MF	63	7	1.33	0.00029	0.050895	iron ion binding
GO:0004497	MF	60	6	1.27	0.00144	0.16848	monooxygenase activity
GO:0016705	MF	61	5	1.29	0.00861	0.755528	oxidoreductase activity, acting on paired donors, with incorporation or reduction of molecular oxygen
GO:0008152	BP	2491	54	47.29	0.0022	1	metabolic process
DEGs enriched GO terms in cluster5, p ≤ 0.01
GO	Class	Annotated	Significant	Expected	Pvalue	AdjustedP(fdr)	Term
GO:0003735	MF	58	23	2.75	1.2e-16	4.212e-14	structural constituent of ribosome
GO:0060589	MF	26	3	1.23	0.0022	0.2925	nucleoside-triphosphatase regulator activity
GO:0004298	MF	13	4	0.62	0.0025	0.2925	threonine-type endopeptidase activity
GO:0008289	MF	22	3	1.04	0.0065	0.570375	lipid binding
GO:0006412	BP	166	30	7.71	9.1e-18	8.8998e-15	translation
GO:0042254	BP	117	27	5.43	2e-12	9.78e-10	ribosome biogenesis
GO:0000272	BP	10	4	0.46	0.00075	0.2445	polysaccharide catabolic process
GO:0042255	BP	6	3	0.28	0.00177	0.412716	ribosome assembly
GO:0006414	BP	25	4	1.16	0.00211	0.412716	translational elongation
GO:0051603	BP	39	4	1.81	0.00675	1	proteolysis involved in cellular protein catabolic process
GO:0005982	BP	10	3	0.46	0.00925	1	starch metabolic process
GO:0005985	BP	10	3	0.46	0.00925	1	sucrose metabolic process
GO:0015935	CC	11	8	0.68	2.3e-08	5.221e-06	small ribosomal subunit
GO:0005840	CC	162	33	10	3.9e-07	4.4265e-05	ribosome
GO:0005839	CC	13	4	0.8	0.0065	0.380225	proteasome core complex
GO:0022626	CC	7	3	0.43	0.0067	0.380225	cytosolic ribosome
DEGs enriched GO terms in cluster 6, p≤0.01
GO	Class	Annotated	Significant	Expected	Pvalue	AdjustedP(fdr)	Term
GO:0003688	MF	7	4	0.25	4.6e-05	0.016146	DNA replication origin binding
GO:0003678	MF	18	5	0.63	0.00016	0.02808	DNA helicase activity
GO:0005524	MF	454	30	15.95	0.00025	0.02925	ATP binding
GO:0022891	MF	124	10	4.36	0.00074	0.064935	substrate-specific transmembrane transporter activity
GO:0003697	MF	8	3	0.28	0.00207	0.145314	single-stranded DNA binding
GO:0030983	MF	9	3	0.32	0.00303	0.177255	mismatched DNA binding
GO:0016887	MF	133	14	4.67	0.00431	0.216116	ATPase activity
GO:0003777	MF	11	3	0.39	0.00566	0.248333	microtubule motor activity
GO:0003682	MF	23	4	0.81	0.0076	0.2964	chromatin binding
GO:0006270	BP	13	6	0.48	2.9e-06	0.0028362	DNA replication initiation
GO:0000727	BP	6	4	0.22	2.4e-05	0.010758	double-strand break repair via break-induced replication
GO:0006267	BP	7	4	0.26	5.5e-05	0.010758	pre-replicative complex assembly involved in nuclear cell cycle DNA replication
GO:0006271	BP	7	4	0.26	5.5e-05	0.010758	DNA strand elongation involved in DNA replication
GO:0000070	BP	7	4	0.26	5.5e-05	0.010758	mitotic sister chromatid segregation
GO:0006200	BP	94	12	3.44	0.00012	0.01956	ATP catabolic process
GO:0032508	BP	18	5	0.66	0.00035	0.0489	DNA duplex unwinding
GO:0006323	BP	9	3	0.33	0.00341	0.416872	DNA packaging
GO:0006298	BP	10	3	0.37	0.00475	0.516167	mismatch repair
GO:0007018	BP	12	3	0.44	0.00825	0.80685	microtubule-based movement
GO:0042555	CC	7	5	0.26	1.2e-06	0.0002724	MCM complex
GO:0031261	CC	6	4	0.22	2.5e-05	0.00141875	DNA replication preinitiation complex
GO:0005656	CC	6	4	0.22	2.5e-05	0.00141875	nuclear pre-replicative complex
GO:0031298	CC	6	4	0.22	2.5e-05	0.00141875	replication fork protection complex
GO:0046809	CC	7	4	0.26	5.6e-05	0.0025424	replication compartment
GO:0044815	CC	7	3	0.26	0.0015	0.05675	DNA packaging complex
GO:0000793	CC	21	4	0.78	0.0064	0.207543	condensed chromosome
DEGs enriched GO terms in cluster 7, p ≤ 0.01
GO	Class	Annotated	Significant	Expected	Pvalue	AdjustedP(fdr)	Term
GO:0008026	MF	41	7	1.36	0.00018	0.06318	ATP-dependent helicase activity
GO:0005524	MF	454	28	15.02	0.00048	0.08424	ATP binding
GO:0003676	MF	518	32	17.14	0.00371	0.40716	nucleic acid binding
GO:0019829	MF	34	5	1.12	0.00464	0.40716	cation-transporting ATPase activity
GO:0051082	MF	13	3	0.43	0.00789	0.541041	unfolded protein binding
GO:0006200	BP	94	12	3.19	5.6e-05	0.054768	ATP catabolic process
GO:0019538	BP	597	16	20.24	0.0039	1	protein metabolic process
GO:0030686	CC	10	3	0.45	0.0082	1	90S preribosome
