# Supplementary material for: Comparative transcriptome analysis revealed genes involved in the fruiting body development of Ophiocordyceps sinensis
Source: PeerJ. 2020 Jan 16;8:e8379. doi: 10.7717/peerj.8379 (PMC6970007; doi:10.7717/peerj.8379)
Supplement: Supplemental Information 8 — DSG: different splicing gene, p ≤ 0.01 was used to judge the significant enriched GO terms. [file peerj-08-8379-s008.xlsx]

## Sheet: Sheet1
Supplemental information 8. GO enrichment of DSGs between different growth stages.
DSGs in FB vs. DF, p ≤ 0.01.
GO	Class	Pvalue	Term
GO:0043021	MF	0.0029	ribonucleoprotein complex binding
GO:0004497	MF	0.0045	monooxygenase activity
GO:0016705	MF	0.0051	oxidoreductase activity, acting on paired donors, with incorporation or reduction of molecular oxygen
GO:0020037	MF	0.008	heme binding
GO:0009166	BP	0.0083	nucleotide catabolic process
GO:0009098	BP	0.0098	leucine biosynthetic process
GO:0009099	BP	0.0098	valine biosynthetic process
GO:0005657	CC	0.007	replication fork
DSGs in FB vs.CM comparison, p ≤ 0.01.
GO	Class	Pvalue	Term
GO:0003684	MF	0.0086	damaged DNA binding
GO:0016705	MF	0.0091	oxidoreductase activity, acting on paired donors, with incorporation or reduction of molecular oxygen
DSGs in DF vs. CM comparison, p ≤ 0.01.
GO	Class	Pvalue	Term
GO:1901363	MF	0.0015	heterocyclic compound binding
GO:0097159	MF	0.0023	organic cyclic compound binding
GO:0016705	MF	0.004	oxidoreductase activity, acting on paired donors, with incorporation or reduction of molecular oxygen
GO:0020037	MF	0.0044	heme binding
GO:0005509	MF	0.0046	calcium ion binding
GO:0005506	MF	0.0087	iron ion binding
GO:0060249	BP	0.0039	anatomical structure homeostasis
GO:0000162	BP	0.0039	tryptophan biosynthetic process
GO:0006571	BP	0.0039	tyrosine biosynthetic process
GO:0009094	BP	0.0039	L-phenylalanine biosynthetic process
